# Supplementary material for: Functional Genomic Analyses of Exopolysaccharide-Producing Streptococcus thermophilus ASCC 1275 in Response to Milk Fermentation Conditions
Source: Front Microbiol. 2019 Aug 23;10:1975. doi: 10.3389/fmicb.2019.01975 (PMC6716118; doi:10.3389/fmicb.2019.01975)
Supplement: TABLE S1 — List of RNA-seq analysis results including DEGs from comparisons between two selected conditions. [file Table_1.XLSX]

## Sheet: functional classification
Locus_tag	GenBank_annotation	KEGG orthology number	ko annotation abbreviation	ko description	COG function	COG category	COG description	PANTHER accession for pathway enrichment analysis
T303_00005	DNA-binding protein	K06346	jag	spoIIIJ-associated protein	COG1847	R	General function prediction only	PTHR35800:SF1
T303_00010	preprotein translocase subunit YidC	K03217	yidC, spoIIIJ, OXA1, ccfA	YidC/Oxa1 family membrane protein insertase	not assigned	not assigned	not assigned	PTHR12428:SF14
T303_00015	ribonuclease P	K03536	rnpA	ribonuclease P protein component [EC:3.1.26.5]	COG0594	J	Translation, ribosomal structure and biogenesis	PTHR33992:SF1
T303_00020	argininosuccinate lyase	K01755	argH, ASL	argininosuccinate lyase [EC:4.3.2.1]	COG0165	E	Amino acid transport and metabolism	PTHR43814:SF1
T303_00025	argininosuccinate synthase	K01940	argG, ASS1	argininosuccinate synthase [EC:6.3.4.5]	COG0137	E	Amino acid transport and metabolism	PTHR11587:SF2
T303_00030	glutamyl-tRNA synthase	K09698	gltX	nondiscriminating glutamyl-tRNA synthetase [EC:6.1.1.24]	COG0008	J	Translation, ribosomal structure and biogenesis	PTHR43311:SF2
T303_00040	50S ribosomal protein L1	K02863	RP-L1, MRPL1, rplA	large subunit ribosomal protein L1	COG0081	J	Translation, ribosomal structure and biogenesis	PTHR36427:SF2
T303_00045	50S ribosomal protein L11	K02867	RP-L11, MRPL11, rplK	large subunit ribosomal protein L11	COG0080	J	Translation, ribosomal structure and biogenesis	PTHR11661:SF7
T303_00050	Integral membrane protein	not assigned	not assigned	not assigned	not assigned	not assigned	not assigned	NOHIT
T303_00055	carbonic anhydrases	K01673	cynT, can	carbonic anhydrase [EC:4.2.1.1]	COG0288	P	Inorganic ion transport and metabolism	PTHR43175
T303_00065	hypothetical protein	not assigned	not assigned	not assigned	not assigned	not assigned	not assigned	NOHIT
T303_00070	DNA repair protein RadA	K04485	radA, sms	DNA repair protein RadA/Sms	COG1066	O	Posttranslational modification, protein turnover, chaperones	PTHR32472:SF10
T303_00075	dUTPase	K01520	dut, DUT	dUTP pyrophosphatase [EC:3.6.1.23]	COG0756	F,V	Nucleotide transport and metabolism	PTHR11241
T303_00095	membrane-bound protein	K16926	htsT	energy-coupling factor transport system substrate-specific component	not assigned	not assigned	not assigned	NOHIT
T303_00100	NAD(P)H-dependent glycerol-3-phosphate dehydrogenase	K00057	gpsA	glycerol-3-phosphate dehydrogenase (NAD(P)+) [EC:1.1.1.94]	COG0240	C	Energy production and conversion	PTHR11728:SF1
T303_00105	UDP glucose pyrophosphorylase	K00963	UGP2, galU, galF	UTP--glucose-1-phosphate uridylyltransferase [EC:2.7.7.9]	COG1210	M	Cell wall/membrane/envelope biogenesis	PTHR43197:SF1
T303_00110	membrane protein	not assigned	not assigned	not assigned	COG0705	O	Posttranslational modification, protein turnover, chaperones	PTHR43731:SF14
T303_00115	5-formyltetrahydrofolate cyclo-ligase	K01934	MTHFS	5-formyltetrahydrofolate cyclo-ligase [EC:6.3.3.2]	COG0212	H	Coenzyme transport and metabolism	PTHR23407:SF1
T303_00120	N-acetyldiaminopimelate deacetylase	K05823	dapL	N-acetyldiaminopimelate deacetylase [EC:3.5.1.47]	COG1473	R	General function prediction only	PTHR11014:SF98
T303_00125	2,3,4,5-tetrahydropyridine-2,6-carboxylate N-succinyltransferase	K00674	dapD	2,3,4,5-tetrahydropyridine-2,6-dicarboxylate N-succinyltransferase[EC:2.3.1.117]	COG2171	E	Amino acid transport and metabolism	PTHR43300:SF4
T303_00130	hypothetical protein	K07025	K07025	putative hydrolase of the HAD superfamily	not assigned	not assigned	not assigned	PTHR46470
T303_00135	haloacid dehalogenase	not assigned	not assigned	not assigned	not assigned	not assigned	not assigned	NOHIT
T303_00140	rRNA (guanine-N1)-methyltransferase	K00563	rlmA1	23S rRNA (guanine745-N1)-methyltransferase [EC:2.1.1.187]	not assigned	not assigned	not assigned	PTHR42912:SF45
T303_00150	hypothetical protein	not assigned	not assigned	not assigned	not assigned	not assigned	not assigned	NOHIT
T303_00155	cytidine/deoxycytidylate deaminase	K11991	tadA	tRNA(adenine34) deaminase [EC:3.5.4.33]	COG0590	J	Translation, ribosomal structure and biogenesis	PTHR11079
T303_00160	single-stranded DNA-binding protein	K03111	ssb	single-strand DNA-binding protein	not assigned	not assigned	not assigned	PTHR10302:SF10
T303_00165	oxidoreductase	not assigned	not assigned	not assigned	COG0425	O	Posttranslational modification, protein turnover, chaperones	PTHR33279
T303_00170	3-isopropylmalate dehydratase large subunit	K07112	K07112	uncharacterized protein	COG2391	R	General function prediction only	PTHR30574:SF1
T303_00175	tRNA-binding protein	K06878	K06878	tRNA-binding protein	COG0073	J	Translation, ribosomal structure and biogenesis	PTHR11586:SF1
T303_00180	thioredoxin	not assigned	not assigned	not assigned	COG0526	O	Posttranslational modification, protein turnover, chaperones	PTHR10438:SF301
T303_00185	membrane protein	not assigned	not assigned	not assigned	not assigned	not assigned	not assigned	NOHIT
T303_00190	glutamyl aminopeptidase	K01261	pepA	glutamyl aminopeptidase [EC:3.4.11.7]	COG1363	E,G	Amino acid transport and metabolism	PTHR32481:SF0
T303_00195	pyrroline-5-carboxylate reductase	K00286	proC	pyrroline-5-carboxylate reductase [EC:1.5.1.2]	COG0345	E	Amino acid transport and metabolism	PTHR11645
T303_00200	CAAX amino terminal protease	K07052	K07052	uncharacterized protein	COG1266	O	Posttranslational modification, protein turnover, chaperones	PTHR43592:SF12
T303_00205	CAAX amino terminal protease	not assigned	not assigned	not assigned	not assigned	not assigned	not assigned	NOHIT
T303_00210	CAAX amino terminal protease	not assigned	not assigned	not assigned	not assigned	not assigned	not assigned	PTHR43592:SF12
T303_00220	acetate kinase	K00925	ackA	acetate kinase [EC:2.7.2.1]	COG0282	C	Energy production and conversion	PTHR21060:SF15
T303_00225	adenine methyltransferase	K00571	E2.1.1.72	site-specific DNA-methyltransferase (adenine-specific) [EC:2.1.1.72]	COG0827	L	Replication, recombination and repair	PTHR33841:SF5
T303_00230	competence protein ComG	not assigned	not assigned	not assigned	not assigned	not assigned	not assigned	NOHIT
T303_00235	competence protein ComG	K02248	comGF	competence protein ComGF	COG4940	X	Mobilome - prophages, transposons	PTHR39583:SF2
T303_00240	Type II secretory pathway, pseudopilin PulG	not assigned	not assigned	not assigned	not assigned	not assigned	not assigned	PTHR38779:SF2
T303_00245	competence protein	K02246	comGD	competence protein ComGD	COG2165	U,N,W	Intracellular trafficking, secretion, and vesicular transport	NOHIT
T303_00250	competence protein ComGC	K02245	comGC	competence protein ComGC	COG4537	X	Mobilome - prophages, transposons	PTHR30093:SF18
T303_00255	competence protein CglB	K02244	comGB	competence protein ComGB	COG1459	U,N,W	Intracellular trafficking, secretion, and vesicular transport	PTHR30012:SF0
T303_00260	competence protein CglA	K02243	comGA	competence protein ComGA	not assigned	not assigned	not assigned	PTHR30258
T303_00265	superoxide dismutase	not assigned	not assigned	not assigned	COG4699	S	Function unknown	NOHIT
T303_00270	DNA-directed RNA polymerase subunit beta'	K03046	rpoC	DNA-directed RNA polymerase subunit beta' [EC:2.7.7.6]	COG0086	K	Transcription	PTHR19376
T303_00275	DNA-directed RNA polymerase subunit beta	K03043	rpoB	DNA-directed RNA polymerase subunit beta [EC:2.7.7.6]	COG0085	K	Transcription	PTHR20856:SF20
T303_00280	penicillin-binding protein 1B	K03693	pbp1b	penicillin-binding protein 1B	COG0744	M	Cell wall/membrane/envelope biogenesis	PTHR32282:SF21
T303_00290	ketol-acid reductoisomerase	K00053	ilvC	ketol-acid reductoisomerase [EC:1.1.1.86]	COG0059	E,H	Amino acid transport and metabolism	PTHR21371:SF1
T303_00295	acetolactate synthase	K01653	E2.2.1.6S, ilvH, ilvN	acetolactate synthase I/III small subunit [EC:2.2.1.6]	COG0440	E	Amino acid transport and metabolism	PTHR30239:SF0
T303_00300	acetolactate synthase	K01652	E2.2.1.6L, ilvB, ilvG, ilvI	acetolactate synthase I/II/III large subunit[EC:2.2.1.6]	COG0028	E,H	Amino acid transport and metabolism	PTHR18968:SF13
T303_00310	dihydroxyacetone kinase	K07030	K07030	uncharacterized protein	COG1461	R	General function prediction only	PTHR33434:SF4
T303_00315	hypothetical protein	not assigned	not assigned	not assigned	COG1302	S	Function unknown	PTHR34297:SF2
T303_00320	sodium:solute antiporter	not assigned	not assigned	not assigned	COG0534	V	Defense mechanisms	PTHR43549:SF1
T303_00325	threonine synthase	K01733	thrC	threonine synthase [EC:4.2.3.1]	COG0498	E	Amino acid transport and metabolism	PTHR43515:SF2
T303_00330	hypothetical protein	not assigned	not assigned	not assigned	not assigned	not assigned	not assigned	NOHIT
T303_00350	endopeptidase	K07386	pepO	putative endopeptidase [EC:3.4.24.-]	COG3590	O	Posttranslational modification, protein turnover, chaperones	PTHR11733:SF197
T303_00355	glutamate racemase	K01226	treC	trehalose-6-phosphate hydrolase [EC:3.2.1.93]	not assigned	not assigned	not assigned	PTHR10357:SF184
T303_00360	alpha-amylase	K01226	treC	trehalose-6-phosphate hydrolase [EC:3.2.1.93]	not assigned	not assigned	not assigned	PTHR10357:SF184
T303_00365	alpha,alpha-phosphotrehalase	K01226	treC	trehalose-6-phosphate hydrolase [EC:3.2.1.93]	not assigned	not assigned	not assigned	PTHR10357:SF179
T303_00370	hypothetical protein	not assigned	not assigned	not assigned	not assigned	not assigned	not assigned	PTHR10357:SF179
T303_00380	GntR family transcriptional regulator	K03486	treR2, treR	GntR family transcriptional regulator, trehalose operon transcriptional repressor	not assigned	not assigned	not assigned	PTHR43488:SF1
T303_00385	trehalose operon transcriptional repressor	K03486	treR2, treR	GntR family transcriptional regulator, trehalose operon transcriptional repressor	not assigned	not assigned	not assigned	PTHR43488:SF1
T303_00390	hypothetical protein	not assigned	not assigned	not assigned	COG4475	S	Function unknown	NOHIT
T303_00395	hypothetical protein	not assigned	not assigned	not assigned	not assigned	not assigned	not assigned	NOHIT
T303_00410	DNA recombinase	not assigned	not assigned	not assigned	not assigned	not assigned	not assigned	PTHR30349:SF53
T303_00415	hypothetical protein	not assigned	not assigned	not assigned	not assigned	not assigned	not assigned	NOHIT
T303_00420	ArsR family transcriptional regulator	not assigned	not assigned	not assigned	COG0640	K	Transcription	PTHR33154:SF18
T303_00425	cadmium transporter	K01534	zntA	Cd2+/Zn2+-exporting ATPase [EC:3.6.3.3 3.6.3.5]	COG2217	P	Inorganic ion transport and metabolism	PTHR43338:SF1
T303_00435	restriction endonuclease subunit M	K03427	hsdM	type I restriction enzyme M protein [EC:2.1.1.72]	COG0286	V	Defense mechanisms	PTHR42933:SF1
T303_00445	DNA-binding protein	not assigned	not assigned	not assigned	not assigned	not assigned	not assigned	NOHIT
T303_00455	transposase IS905	not assigned	not assigned	not assigned	COG3328	X	Mobilome - prophages, transposons	PTHR33217
T303_00465	fructose-1,6-bisphosphate aldolase	K01624	FBA, fbaA	fructose-bisphosphate aldolase, class II [EC:4.1.2.13]	COG0191	G	Carbohydrate transport and metabolism	PTHR30304:SF0
T303_00470	tRNA Leu	K14228	tRNA-Leu	tRNA Leu	not assigned	not assigned	not assigned	NOHIT
T303_00485	transposase ISApl1	not assigned	not assigned	not assigned	not assigned	not assigned	not assigned	PTHR10948:SF23
T303_00490	50S ribosomal protein L17	K02879	RP-L17, MRPL17, rplQ	large subunit ribosomal protein L17	COG0203	J	Translation, ribosomal structure and biogenesis	PTHR14413
T303_00495	DNA-directed RNA polymerase subunit alpha	K03040	rpoA	DNA-directed RNA polymerase subunit alpha [EC:2.7.7.6]	COG0202	K	Transcription	PTHR32108:SF0
T303_00500	30S ribosomal protein S11	K02948	RP-S11, MRPS11, rpsK	small subunit ribosomal protein S11	COG0100	J	Translation, ribosomal structure and biogenesis	PTHR11759:SF13
T303_00505	30S ribosomal protein S13	K02952	RP-S13, rpsM	small subunit ribosomal protein S13	COG0099	J	Translation, ribosomal structure and biogenesis	PTHR10871:SF1
T303_00510	50S ribosomal protein L36	K02919	RP-L36, MRPL36, rpmJ	large subunit ribosomal protein L36	COG0257	J	Translation, ribosomal structure and biogenesis	PTHR42888:SF1
T303_00515	translation initiation factor IF-1	K02518	infA	translation initiation factor IF-1	COG0361	J	Translation, ribosomal structure and biogenesis	PTHR33370:SF1
T303_00520	adenylate kinase	K00939	adk, AK	adenylate kinase [EC:2.7.4.3]	COG0563	F	Nucleotide transport and metabolism	PTHR23359:SF22
T303_00525	preprotein translocase subunit SecY	K03076	secY	preprotein translocase subunit SecY	COG0201	U	Intracellular trafficking, secretion, and vesicular transport	PTHR10906:SF2
T303_00530	50S ribosomal protein L15	K02876	RP-L15, MRPL15, rplO	large subunit ribosomal protein L15	COG0200	J	Translation, ribosomal structure and biogenesis	PTHR12934:SF11
T303_00535	50S ribosomal protein L30	K02907	RP-L30, MRPL30, rpmD	large subunit ribosomal protein L30	COG1841	J	Translation, ribosomal structure and biogenesis	PTHR15892:SF2
T303_00540	30S ribosomal protein S5	K02988	RP-S5, MRPS5, rpsE	small subunit ribosomal protein S5	COG0098	J	Translation, ribosomal structure and biogenesis	PTHR13718:SF61
T303_00545	50S ribosomal protein L18	K02881	RP-L18, MRPL18, rplR	large subunit ribosomal protein L18	COG0256	J	Translation, ribosomal structure and biogenesis	PTHR12899:SF3
T303_00550	50S ribosomal protein L6	K02933	RP-L6, MRPL6, rplF	large subunit ribosomal protein L6	COG0097	J	Translation, ribosomal structure and biogenesis	PTHR11655:SF14
T303_00555	30S ribosomal protein S8	K02994	RP-S8, rpsH	small subunit ribosomal protein S8	COG0096	J	Translation, ribosomal structure and biogenesis	PTHR11758:SF20
T303_00560	30S ribosomal protein S14	K02954	RP-S14, MRPS14, rpsN	small subunit ribosomal protein S14	COG0199	J	Translation, ribosomal structure and biogenesis	PTHR19836:SF24
T303_00565	50S ribosomal protein L5	K02931	RP-L5, MRPL5, rplE	large subunit ribosomal protein L5	COG0094	J	Translation, ribosomal structure and biogenesis	PTHR11994:SF4
T303_00570	50S ribosomal protein L24	K02895	RP-L24, MRPL24, rplX	large subunit ribosomal protein L24	COG0198	J	Translation, ribosomal structure and biogenesis	PTHR12903
T303_00575	50S ribosomal protein L14	K02874	RP-L14, MRPL14, rplN	large subunit ribosomal protein L14	COG0093	J	Translation, ribosomal structure and biogenesis	PTHR11761:SF3
T303_00580	30S ribosomal protein S17	K02961	RP-S17, MRPS17, rpsQ	small subunit ribosomal protein S17	COG0186	J	Translation, ribosomal structure and biogenesis	PTHR10744:SF1
T303_00585	50S ribosomal protein L29	K02904	RP-L29, rpmC	large subunit ribosomal protein L29	COG0255	J	Translation, ribosomal structure and biogenesis	PTHR10916:SF0
T303_00590	50S ribosomal protein L16	K02878	RP-L16, MRPL16, rplP	large subunit ribosomal protein L16	COG0197	J	Translation, ribosomal structure and biogenesis	PTHR12220:SF13
T303_00595	30S ribosomal protein S3	K02982	RP-S3, rpsC	small subunit ribosomal protein S3	COG0092	J	Translation, ribosomal structure and biogenesis	PTHR11760:SF19
T303_00600	50S ribosomal protein L22	K02890	RP-L22, MRPL22, rplV	large subunit ribosomal protein L22	COG0091	J	Translation, ribosomal structure and biogenesis	PTHR13501:SF8
T303_00605	30S ribosomal protein S19	K02965	RP-S19, rpsS	small subunit ribosomal protein S19	COG0185	J	Translation, ribosomal structure and biogenesis	PTHR11880:SF9
T303_00610	50S ribosomal protein L2	K02886	RP-L2, MRPL2, rplB	large subunit ribosomal protein L2	COG0090	J	Translation, ribosomal structure and biogenesis	PTHR13691:SF5
T303_00615	50S ribosomal protein L23	K02892	RP-L23, MRPL23, rplW	large subunit ribosomal protein L23	COG0089	J	Translation, ribosomal structure and biogenesis	PTHR11620:SF55
T303_00620	50S ribosomal protein L4	K02926	RP-L4, MRPL4, rplD	large subunit ribosomal protein L4	COG0088	J	Translation, ribosomal structure and biogenesis	PTHR10746
T303_00625	50S ribosomal protein L3	K02906	RP-L3, MRPL3, rplC	large subunit ribosomal protein L3	COG0087	J	Translation, ribosomal structure and biogenesis	PTHR11229:SF8
T303_00630	30S ribosomal protein S10	K02946	RP-S10, MRPS10, rpsJ	small subunit ribosomal protein S10	COG0051	J	Translation, ribosomal structure and biogenesis	PTHR11700:SF9
T303_00635	Holliday junction DNA helicase RuvB	K03551	ruvB	holliday junction DNA helicase RuvB [EC:3.6.4.12]	COG2255	L	Replication, recombination and repair	PTHR42848:SF1
T303_00640	acyltransferase	not assigned	not assigned	not assigned	COG1835	M	Cell wall/membrane/envelope biogenesis	PTHR23028:SF53
T303_00645	membrane protein	not assigned	not assigned	not assigned	not assigned	not assigned	not assigned	PTHR23084:SF123
T303_00650	phosphotyrosine protein phosphatase	K01104	E3.1.3.48	protein-tyrosine phosphatase [EC:3.1.3.48]	COG0394	T	Signal transduction mechanisms	PTHR11717
T303_00655	adenylosuccinate synthetase	K01939	purA, ADSS	adenylosuccinate synthase [EC:6.3.4.4]	COG0104	F	Nucleotide transport and metabolism	PTHR11846:SF0
T303_00660	topology modulation protein	not assigned	not assigned	not assigned	COG0563	F	Nucleotide transport and metabolism	PTHR37816:SF1
T303_00665	multidrug-efflux transporter	not assigned	not assigned	not assigned	not assigned	not assigned	not assigned	PTHR23530:SF1
T303_00670	bacteriocin biosynthesis protein	not assigned	not assigned	not assigned	COG0476	H	Coenzyme transport and metabolism	PTHR10953:SF102
T303_00685	ABC transporter ATP-binding protein	not assigned	not assigned	not assigned	COG1132	V	Defense mechanisms	PTHR24221:SF424
T303_00690	hypothetical protein	not assigned	not assigned	not assigned	not assigned	not assigned	not assigned	PTHR37038
T303_00695	MutR family transcriptional regulator	not assigned	not assigned	not assigned	not assigned	not assigned	not assigned	PTHR37038:SF12
T303_00700	hypothetical protein	not assigned	not assigned	not assigned	not assigned	not assigned	not assigned	NOHIT
T303_00710	ABC transporter ATP-binding protein	not assigned	not assigned	not assigned	COG1132	V	Defense mechanisms	PTHR24222
T303_00720	hypothetical protein	not assigned	not assigned	not assigned	not assigned	not assigned	not assigned	NOHIT
T303_00730	replication initiator protein	not assigned	not assigned	not assigned	not assigned	not assigned	not assigned	NOHIT
T303_00735	hypothetical protein	not assigned	not assigned	not assigned	not assigned	not assigned	not assigned	NOHIT
T303_00740	integrase	not assigned	not assigned	not assigned	not assigned	not assigned	not assigned	PTHR30349:SF55
T303_00745	tRNA Lys	K14229	tRNA-Lys	tRNA Lys	not assigned	not assigned	not assigned	NOHIT
T303_00750	recombinase RarA	K07478	ycaJ	putative ATPase	COG2256	L	Replication, recombination and repair	PTHR13779:SF7
T303_00755	50S ribosomal protein L28	K02902	RP-L28, MRPL28, rpmB	large subunit ribosomal protein L28	COG0227	J	Translation, ribosomal structure and biogenesis	PTHR39080:SF1
T303_00760	hypothetical protein	not assigned	not assigned	not assigned	COG4472	S	Function unknown	PTHR40067:SF1
T303_00765	Holliday junction resolvase	K07447	ruvX	putative holliday junction resolvase [EC:3.1.-.-]	COG0816	K	Transcription	PTHR33317:SF1
T303_00770	hypothetical protein	not assigned	not assigned	not assigned	COG3906	S	Function unknown	PTHR40066:SF1
T303_00775	4-amino-4-deoxy-L-arabinose transferase glycosyltransferase-like protein of PMT family	not assigned	not assigned	not assigned	not assigned	not assigned	not assigned	NOHIT
T303_00780	ribonucleoside triphosphate reductase	K21636	nrdD	ribonucleoside-triphosphate reductase (formate) [EC:1.1.98.6]	COG1328	F	Nucleotide transport and metabolism	PTHR21075:SF0
T303_00785	hypothetical protein	not assigned	not assigned	not assigned	not assigned	not assigned	not assigned	NOHIT
T303_00790	GNAT family acetyltransferase	not assigned	not assigned	not assigned	COG3981	R	General function prediction only	PTHR39173:SF1
T303_00795	anaerobic ribonucleoside-triphosphate reductase activating protein	K04068	nrdG	anaerobic ribonucleoside-triphosphate reductase activating protein[EC:1.97.1.4]	COG0602	R	General function prediction only	PTHR30352:SF2
T303_00800	hypothetical protein	K09861	K09861	uncharacterized protein	COG3022	P	Inorganic ion transport and metabolism	PTHR30283:SF3
T303_00805	tyrosyl-tRNA synthetase	not assigned	not assigned	not assigned	COG1284	S	Function unknown	PTHR33545:SF8
T303_00810	aspartyl-tRNA synthetase	K01876	aspS	aspartyl-tRNA synthetase [EC:6.1.1.12]	COG0173	J	Translation, ribosomal structure and biogenesis	PTHR22594:SF5
T303_00815	hypothetical protein	not assigned	not assigned	not assigned	not assigned	not assigned	not assigned	NOHIT
T303_00820	histidyl-tRNA synthase	K01892	HARS, hisS	histidyl-tRNA synthetase [EC:6.1.1.21]	COG0124	J	Translation, ribosomal structure and biogenesis	PTHR43707:SF1
T303_00830	methionine synthase	not assigned	not assigned	not assigned	not assigned	not assigned	not assigned	PTHR43844:SF1
T303_00835	50S ribosomal protein L32	K02911	RP-L32, MRPL32, rpmF	large subunit ribosomal protein L32	COG0333	J	Translation, ribosomal structure and biogenesis	PTHR35534:SF1
T303_00840	50S ribosomal protein L33	K02913	RP-L33, MRPL33, rpmG	large subunit ribosomal protein L33	COG0267	J	Translation, ribosomal structure and biogenesis	PTHR43168:SF2
T303_00860	hypothetical protein	not assigned	not assigned	not assigned	not assigned	not assigned	not assigned	NOHIT
T303_00865	Transglycosylase associated protein	not assigned	not assigned	not assigned	COG2261	R	General function prediction only	PTHR33884:SF3
T303_00870	membrane protein	not assigned	not assigned	not assigned	not assigned	not assigned	not assigned	NOHIT
T303_00875	membrane protein	not assigned	not assigned	not assigned	COG5547	S	Function unknown	NOHIT
T303_00880	General stress regulator, Gls24 family	not assigned	not assigned	not assigned	COG1302	S	Function unknown	PTHR34297:SF3
T303_00885	hypothetical protein	not assigned	not assigned	not assigned	not assigned	not assigned	not assigned	PTHR34977:SF1
T303_00910	hypothetical protein	not assigned	not assigned	not assigned	not assigned	not assigned	not assigned	NOHIT
T303_00915	membrane protein	K01421	yhgE	putative membrane protein	COG1511	S	Function unknown	PTHR43077:SF5
T303_00920	TetR family transcriptional regulator	not assigned	not assigned	not assigned	COG1309	K	Transcription	PTHR43479
T303_00925	membrane protein	K08987	K08987	putative membrane protein	COG3759	S	Function unknown	PTHR38446:SF1
T303_00935	30S ribosomal protein S4	K02986	RP-S4, rpsD	small subunit ribosomal protein S4	COG0522	J	Translation, ribosomal structure and biogenesis	PTHR11831:SF4
T303_00940	hypothetical protein	not assigned	not assigned	not assigned	COG4466	S	Function unknown	PTHR40026:SF1
T303_00945	DNA helicase	K02314	dnaB	replicative DNA helicase [EC:3.6.4.12]	COG0305	L	Replication, recombination and repair	PTHR30153:SF2
T303_00950	50S ribosomal protein L9	K02939	RP-L9, MRPL9, rplI	large subunit ribosomal protein L9	COG0359	J	Translation, ribosomal structure and biogenesis	PTHR21368:SF18
T303_00955	DHH family phosphoesterase	not assigned	not assigned	not assigned	COG3887	T	Signal transduction mechanisms	PTHR12112:SF18
T303_00960	tRNA uridine 5-carboxymethylaminomethyl modification protein	K03495	gidA, mnmG, MTO1	tRNA uridine 5-carboxymethylaminomethyl modification enzyme	COG0445	J	Translation, ribosomal structure and biogenesis	PTHR11806:SF0
T303_00965	NUDIX hydrolase	not assigned	not assigned	not assigned	COG1051	F	Nucleotide transport and metabolism	PTHR43046
T303_00970	thiouridylase	K00566	mnmA, trmU	tRNA-uridine 2-sulfurtransferase [EC:2.8.1.13]	COG0482	J	Translation, ribosomal structure and biogenesis	PTHR11933:SF5
T303_00975	membrane protein	not assigned	not assigned	not assigned	not assigned	not assigned	not assigned	NOHIT
T303_00980	hypothetical protein	not assigned	not assigned	not assigned	not assigned	not assigned	not assigned	NOHIT
T303_00985	peptidoglycan-binding protein LysM	not assigned	not assigned	not assigned	not assigned	not assigned	not assigned	PTHR33734:SF12
T303_00990	transporter	K16785	ecfT	energy-coupling factor transport system permease protein	COG0619	H	Coenzyme transport and metabolism	PTHR33514:SF4
T303_00995	cobalt ABC transporter ATP-binding protein	K16787	ecfA2	energy-coupling factor transport system ATP-binding protein [EC:3.6.3.-]	COG1122	P,R	Inorganic ion transport and metabolism	PTHR43553:SF8
T303_01000	cobalt ABC transporter ATP-binding protein	K16786	ecfA1	energy-coupling factor transport system ATP-binding protein [EC:3.6.3.-]	COG1122	P,R	Inorganic ion transport and metabolism	PTHR43553:SF12
T303_01005	CDP-diacylglycerol--glycerol-3-phosphate 3-phosphatidyltransferase	K00995	pgsA, PGS1	CDP-diacylglycerol---glycerol-3-phosphate 3-phosphatidyltransferase [EC:2.7.8.5]	COG0558	I	Lipid transport and metabolism	PTHR14269:SF11
T303_01010	membrane protein	not assigned	not assigned	not assigned	COG1426	D	Cell cycle control, cell division, chromosome partitioning	PTHR34475:SF1
T303_01015	peptidase M16	not assigned	not assigned	not assigned	COG0612	R	General function prediction only	PTHR11851:SF134
T303_01020	peptidase M16	not assigned	not assigned	not assigned	COG0612	R	General function prediction only	PTHR11851:SF186
T303_01025	hypothetical protein	not assigned	not assigned	not assigned	COG2501	J	Translation, ribosomal structure and biogenesis	PTHR32319:SF3
T303_01030	recombinase RecF	K03629	recF	DNA replication and repair protein RecF	COG1195	L	Replication, recombination and repair	PTHR32182:SF0
T303_01035	inosine 5'-monophosphate dehydrogenase	K00088	IMPDH, guaB	IMP dehydrogenase [EC:1.1.1.205]	COG0516	F	Nucleotide transport and metabolism	PTHR11911:SF111
T303_01040	tryptophanyl-tRNA synthase	K01867	WARS, trpS	tryptophanyl-tRNA synthetase [EC:6.1.1.2]	COG0180	J	Translation, ribosomal structure and biogenesis	PTHR10055:SF9
T303_01045	membrane protein	not assigned	not assigned	not assigned	COG1284	S	Function unknown	PTHR33545
T303_01050	ABC transporter ATP-binding protein	not assigned	not assigned	not assigned	COG0488	R	General function prediction only	PTHR19211:SF96
T303_01055	ABC transporter permease	not assigned	not assigned	not assigned	COG4485	S	Function unknown	PTHR38454:SF1
T303_01060	tRNA Asn	K14220	tRNA-Asn	tRNA Asn	not assigned	not assigned	not assigned	NOHIT
T303_01065	tRNA Glu	K14224	tRNA-Glu	tRNA Glu	not assigned	not assigned	not assigned	NOHIT
T303_01070	tRNA Arg	K14219	tRNA-Arg	tRNA Arg	not assigned	not assigned	not assigned	NOHIT
T303_01080	50S rRNA methyltransferase	K00783	rlmH	23S rRNA (pseudouridine1915-N3)-methyltransferase [EC:2.1.1.177]	COG1576	J	Translation, ribosomal structure and biogenesis	PTHR33603:SF1
T303_01085	serine protease	K04771	degP, htrA	serine protease Do [EC:3.4.21.107]	COG0265	O	Posttranslational modification, protein turnover, chaperones	PTHR43019:SF4
T303_01090	plasmid partitioning protein ParB	K03497	parB, spo0J	chromosome partitioning protein, ParB family	COG1475	D	Cell cycle control, cell division, chromosome partitioning	PTHR33375:SF1
T303_01095	chromosomal replication initiation protein DnaA	K02313	dnaA	chromosomal replication initiator protein	COG0593	L	Replication, recombination and repair	PTHR30050:SF2
T303_01100	DNA polymerase III subunit beta	K02338	dnaN	DNA polymerase III subunit beta [EC:2.7.7.7]	COG0592	L	Replication, recombination and repair	PTHR30478:SF0
T303_01105	hypothetical protein	not assigned	not assigned	not assigned	COG4481	S	Function unknown	PTHR38455:SF1
T303_01110	GTP-binding protein YchF	K06942	ychF	ribosome-binding ATPase	COG0012	J	Translation, ribosomal structure and biogenesis	PTHR23305:SF12
T303_01115	peptidyl-tRNA hydrolase	K01056	PTH1, pth, spoVC	peptidyl-tRNA hydrolase, PTH1 family [EC:3.1.1.29]	COG0193	J	Translation, ribosomal structure and biogenesis	PTHR17224
T303_01120	transcription-repair coupling factor	K03723	mfd	transcription-repair coupling factor (superfamily II helicase) [EC:3.6.4.-]	COG1197	L,K	Replication, recombination and repair	PTHR24029:SF1
T303_01125	hypothetical protein	not assigned	not assigned	not assigned	COG1188	J	Translation, ribosomal structure and biogenesis	PTHR21600:SF19
T303_01130	septum formation initiation protein	K13052	divIC, divA	cell division protein DivIC	COG2919	D	Cell cycle control, cell division, chromosome partitioning	PTHR40027:SF1
T303_01135	recombinase	not assigned	not assigned	not assigned	not assigned	not assigned	not assigned	NOHIT
T303_01140	beta-lactamase	K01467	ampC	beta-lactamase class C [EC:3.5.2.6]	COG2367	V	Defense mechanisms	PTHR35333:SF3
T303_01145	tRNA(Ile)-lysidine synthetase	K04075	tilS, mesJ	tRNA(Ile)-lysidine synthase [EC:6.3.4.19]	COG0037	J	Translation, ribosomal structure and biogenesis	PTHR43033:SF1
T303_01150	hypoxanthine phosphoribosyltransferase	K00760	hprT, hpt, HPRT1	hypoxanthine phosphoribosyltransferase [EC:2.4.2.8]	COG0634	F	Nucleotide transport and metabolism	PTHR43340:SF1
T303_01155	cell division protein FtsH	K03798	ftsH, hflB	cell division protease FtsH [EC:3.4.24.-]	COG0465	O	Posttranslational modification, protein turnover, chaperones	PTHR23076:SF97
T303_01165	transposase	not assigned	not assigned	not assigned	COG2963	X	Mobilome - prophages, transposons	PTHR33795:SF1
T303_01175	transposase	K07497	K07497	putative transposase	not assigned	not assigned	not assigned	PTHR42648:SF3
T303_01180	16S ribosomal RNA	K01977	16SrRNA, rrs	16S ribosomal RNA	not assigned	not assigned	not assigned	NOHIT
T303_01185	tRNA Ala	K14218	tRNA-Ala	tRNA Ala	not assigned	not assigned	not assigned	NOHIT
T303_01190	23S ribosomal RNA	K01980	23SrRNA, rrl	23S ribosomal RNA	not assigned	not assigned	not assigned	NOHIT
T303_01195	5S ribosomal RNA	K01985	5SrRNA, rrf	5S ribosomal RNA	not assigned	not assigned	not assigned	NOHIT
T303_01200	tRNA Val	K14237	tRNA-Val	tRNA Val	not assigned	not assigned	not assigned	NOHIT
T303_01205	tRNA Asp	K14221	tRNA-Asp	tRNA Asp	not assigned	not assigned	not assigned	NOHIT
T303_01210	tRNA Lys	K14229	tRNA-Lys	tRNA Lys	not assigned	not assigned	not assigned	NOHIT
T303_01215	tRNA Leu	K14228	tRNA-Leu	tRNA Leu	not assigned	not assigned	not assigned	NOHIT
T303_01220	tRNA Thr	K14234	tRNA-Thr	tRNA Thr	not assigned	not assigned	not assigned	NOHIT
T303_01225	tRNA Gly	K14225	tRNA-Gly	tRNA Gly	not assigned	not assigned	not assigned	NOHIT
T303_01230	tRNA Leu	K14228	tRNA-Leu	tRNA Leu	not assigned	not assigned	not assigned	NOHIT
T303_01235	tRNA Arg	K14219	tRNA-Arg	tRNA Arg	not assigned	not assigned	not assigned	NOHIT
T303_01240	tRNA Pro	K14232	tRNA-Pro	tRNA Pro	not assigned	not assigned	not assigned	NOHIT
T303_01245	tRNA Met	K14230	tRNA-Met	tRNA Met	not assigned	not assigned	not assigned	NOHIT
T303_01250	tRNA Met	K14230	tRNA-Met	tRNA Met	not assigned	not assigned	not assigned	NOHIT
T303_01255	tRNA Ser	K14233	tRNA-Ser	tRNA Ser	not assigned	not assigned	not assigned	NOHIT
T303_01260	tRNA Met	K14230	tRNA-Met	tRNA Met	not assigned	not assigned	not assigned	NOHIT
T303_01265	tRNA Phe	K14231	tRNA-Phe	tRNA Phe	not assigned	not assigned	not assigned	NOHIT
T303_01270	tRNA Gly	K14225	tRNA-Gly	tRNA Gly	not assigned	not assigned	not assigned	NOHIT
T303_01275	tRNA Ile	K14227	tRNA-Ile	tRNA Ile	not assigned	not assigned	not assigned	NOHIT
T303_01280	tRNA Ser	K14233	tRNA-Ser	tRNA Ser	not assigned	not assigned	not assigned	NOHIT
T303_01285	rod shape-determining protein MreC	K03570	mreC	rod shape-determining protein MreC	COG1792	D	Cell cycle control, cell division, chromosome partitioning	PTHR34138:SF1
T303_01290	rod shape-determining protein MreD	K03571	mreD	rod shape-determining protein MreD	COG2891	M	Cell wall/membrane/envelope biogenesis	NOHIT
T303_01295	glucan binding protein	K21471	cwlO	peptidoglycan DL-endopeptidase CwlO [EC:3.4.-.-]	COG3883	S	Function unknown	PTHR47359:SF2
T303_01300	ribose-phosphate pyrophosphokinase	K00948	PRPS, prsA	ribose-phosphate pyrophosphokinase [EC:2.7.6.1]	COG0462	E,F	Amino acid transport and metabolism	PTHR10210:SF41
T303_01310	aminotransferase A	K00841	patA	ami notransferase [EC:2.6.1.-]	COG0436	E	Amino acid transport and metabolism	PTHR43795:SF24
T303_01315	DNA repair protein RecO	K03584	recO	DNA repair protein RecO (recombination protein O)	COG1381	L	Replication, recombination and repair	PTHR33991:SF1
T303_01320	phosphate acyltransferase	K03621	plsX	glycerol-3-phosphate acyltransferase PlsX [EC:2.3.1.15]	COG0416	I	Lipid transport and metabolism	PTHR30100:SF1
T303_01325	acyl carrier protein	K02078	acpP	acyl carrier protein	COG0236	I,Q	Lipid transport and metabolism	PTHR20863:SF28
T303_01330	phosphoribosylaminoimidazole-succinocarboxamide synthase	K01923	purC	phosphoribosylaminoimidazole-succinocarboxamide synthase [EC:6.3.2.6]	COG0152	F	Nucleotide transport and metabolism	PTHR43599:SF3
T303_01335	phosphoribosylformylglycinamidine synthase	K01952	purL, PFAS	phosphoribosylformylglycinamidine synthase [EC:6.3.5.3]	COG0046	F	Nucleotide transport and metabolism	PTHR10099:SF1
T303_01340	amidophosphoribosyltransferase	K00764	purF, PPAT	amidophosphoribosyltransferase [EC:2.4.2.14]	COG0034	F	Nucleotide transport and metabolism	PTHR11907:SF0
T303_01345	phosphoribosylaminoimidazole synthetase	K01933	purM	phosphoribosylformylglycinamidine cyclo-ligase [EC:6.3.3.1]	COG0150	F	Nucleotide transport and metabolism	PTHR10520
T303_01350	phosphoribosylglycinamide formyltransferase	K11175	purN	phosphoribosylglycinamide formyltransferase 1 [EC:2.1.2.2]	COG0299	F	Nucleotide transport and metabolism	PTHR43369
T303_01355	purine biosynthesis protein purH	K00602	purH	phosphoribosylaminoimidazolecarboxamide formyltransferase / IMP cyclohydrolase [EC:2.1.2.3 3.5.4.10]	COG0138	F	Nucleotide transport and metabolism	PTHR11692:SF0
T303_01360	transposase	not assigned	not assigned	not assigned	COG2963	X	Mobilome - prophages, transposons	PTHR33795:SF1
T303_01375	cell wall protein precursor, choline binding protein	not assigned	not assigned	not assigned	COG3942	M	Cell wall/membrane/envelope biogenesis	NOHIT
T303_01380	phosphoribosylamine--glycine ligase	K01945	purD	phosphoribosylamine---glycine ligase [EC:6.3.4.13]	COG0151	F	Nucleotide transport and metabolism	PTHR43472:SF1
T303_01390	phosphoribosylaminoimidazole carboxylase	K01589	purK	5-(carboxyamino)imidazole ribonucleotide synthase [EC:6.3.4.18]	COG0026	F	Nucleotide transport and metabolism	PTHR11609
T303_01405	adenylosuccinate lyase	K01756	purB, ADSL	adenylosuccinate lyase [EC:4.3.2.2]	COG0015	F	Nucleotide transport and metabolism	PTHR43172:SF1
T303_01410	hypothetical protein	not assigned	not assigned	not assigned	not assigned	not assigned	not assigned	NOHIT
T303_01415	arginyl-tRNA synthetase	K01887	RARS, argS	arginyl-tRNA synthetase [EC:6.1.1.19]	COG0018	J	Translation, ribosomal structure and biogenesis	PTHR11956
T303_01420	arginine repressor ArgR	K03402	argR, ahrC	transcriptional regulator of arginine metabolism	COG1438	K	Transcription	PTHR34471:SF1
T303_01425	hypothetical protein	not assigned	not assigned	not assigned	COG4550	T	Signal transduction mechanisms	PTHR38448:SF1
T303_01430	DNA mismatch repair protein MutS	K03555	mutS	DNA mismatch repair protein MutS	COG0249	L	Replication, recombination and repair	PTHR11361:SF34
T303_01435	hypothetical protein	not assigned	not assigned	not assigned	not assigned	not assigned	not assigned	NOHIT
T303_01440	hisitidine kinase	not assigned	not assigned	not assigned	not assigned	not assigned	not assigned	PTHR37299:SF2
T303_01445	hypothetical protein	not assigned	not assigned	not assigned	not assigned	not assigned	not assigned	NOHIT
T303_01450	DNA mismatch repair protein MutL	K03572	mutL	DNA mismatch repair protein MutL	COG0323	L	Replication, recombination and repair	PTHR10073:SF12
T303_01455	hypothetical protein	not assigned	not assigned	not assigned	not assigned	not assigned	not assigned	NOHIT
T303_01460	Holliday junction DNA helicase RuvA	K03550	ruvA	holliday junction DNA helicase RuvA [EC:3.6.4.12]	COG0632	L	Replication, recombination and repair	PTHR33796:SF1
T303_01465	3-methyladenine DNA glycosylase	K01246	tag	DNA-3-methyladenine glycosylase I [EC:3.2.2.20]	COG2818	L	Replication, recombination and repair	PTHR30037:SF4
T303_01470	damage-inducible protein A	K03742	pncC	nicotinamide-nucleotide amidase [EC:3.5.1.42]	COG1058	R	General function prediction only	PTHR13939:SF0
T303_01475	recombinase RecA	K03553	recA	recombination protein RecA	COG0468	L	Replication, recombination and repair	PTHR45900:SF1
T303_01480	arsenate reductase	not assigned	not assigned	not assigned	COG1393	P	Inorganic ion transport and metabolism	PTHR30041:SF4
T303_01485	16S ribosomal RNA	K01977	16SrRNA, rrs	16S ribosomal RNA	not assigned	not assigned	not assigned	NOHIT
T303_01490	tRNA Ala	K14218	tRNA-Ala	tRNA Ala	not assigned	not assigned	not assigned	NOHIT
T303_01495	23S ribosomal RNA	K01980	23SrRNA, rrl	23S ribosomal RNA	not assigned	not assigned	not assigned	NOHIT
T303_01500	5S ribosomal RNA	K01985	5SrRNA, rrf	5S ribosomal RNA	not assigned	not assigned	not assigned	NOHIT
T303_01505	tRNA Val	K14237	tRNA-Val	tRNA Val	not assigned	not assigned	not assigned	NOHIT
T303_01510	tRNA Gly	K14225	tRNA-Gly	tRNA Gly	not assigned	not assigned	not assigned	NOHIT
T303_01515	tRNA Ile	K14227	tRNA-Ile	tRNA Ile	not assigned	not assigned	not assigned	NOHIT
T303_01520	tRNA Glu	K14224	tRNA-Glu	tRNA Glu	not assigned	not assigned	not assigned	NOHIT
T303_01525	tRNA Ser	K14233	tRNA-Ser	tRNA Ser	not assigned	not assigned	not assigned	NOHIT
T303_01530	tRNA Met	K14230	tRNA-Met	tRNA Met	not assigned	not assigned	not assigned	NOHIT
T303_01535	tRNA Phe	K14231	tRNA-Phe	tRNA Phe	not assigned	not assigned	not assigned	NOHIT
T303_01540	tRNA Tyr	K14236	tRNA-Tyr	tRNA Tyr	not assigned	not assigned	not assigned	NOHIT
T303_01545	tRNA Trp	K14235	tRNA-Trp	tRNA Trp	not assigned	not assigned	not assigned	NOHIT
T303_01550	tRNA His	K14226	tRNA-His	tRNA His	not assigned	not assigned	not assigned	NOHIT
T303_01555	tRNA Gln	K14223	tRNA-Gln	tRNA Gln	not assigned	not assigned	not assigned	NOHIT
T303_01560	tRNA Leu	K14228	tRNA-Leu	tRNA Leu	not assigned	not assigned	not assigned	NOHIT
T303_01565	DNA polymerase III PolC	K03763	polC	DNA polymerase III subunit alpha, Gram-positive type [EC:2.7.7.7]	COG2176	L	Replication, recombination and repair	PTHR23044:SF26
T303_01570	aminopeptidase T	K19689	ampS, pepS, ampT	aminopeptidase [EC:3.4.11.-]	COG2309	E	Amino acid transport and metabolism	PTHR34448:SF3
T303_01575	membrane protein	not assigned	not assigned	not assigned	COG2261	R	General function prediction only	PTHR33884:SF3
T303_01585	MarR family transcriptional regulator	not assigned	not assigned	not assigned	COG1846	K	Transcription	PTHR33164:SF43
T303_01595	transposase	K07497	K07497	putative transposase	not assigned	not assigned	not assigned	PTHR42648:SF3
T303_01600	transposase IS861	not assigned	not assigned	not assigned	not assigned	not assigned	not assigned	PTHR42648:SF3
T303_01605	hypothetical protein	not assigned	not assigned	not assigned	not assigned	not assigned	not assigned	NOHIT
T303_01615	tRNA Cys	K14222	tRNA-Cys	tRNA Cys	not assigned	not assigned	not assigned	NOHIT
T303_01620	30S ribosomal protein S2	K02967	RP-S2, MRPS2, rpsB	small subunit ribosomal protein S2	COG0052	J	Translation, ribosomal structure and biogenesis	PTHR12534:SF0
T303_01625	elongation factor Ts	K02357	tsf, TSFM	elongation factor Ts	COG0264	J	Translation, ribosomal structure and biogenesis	PTHR11741:SF0
T303_01630	small multi-drug export	not assigned	not assigned	not assigned	COG2426	S	Function unknown	PTHR36007:SF1
T303_01635	CtsR family transcriptional regulator	K03708	ctsR	transcriptional regulator of stress and heat shock response	COG4463	K	Transcription	PTHR40028:SF1
T303_01640	ATP-dependent Clp protease ATP-binding protein	K03696	clpC	ATP-dependent Clp protease ATP-binding subunit ClpC	COG0542	O	Posttranslational modification, protein turnover, chaperones	PTHR43572:SF4
T303_01650	D-alanyl-D-alanine carboxypeptidase	K07258	dacC, dacA, dacD	serine-type D-Ala-D-Ala carboxypeptidase (penicillin-binding protein 5/6) [EC:3.4.16.4]	COG1686	M	Cell wall/membrane/envelope biogenesis	PTHR21581:SF11
T303_01655	polynucleotide phosphorylase	K00962	pnp, PNPT1	polyribonucleotide nucleotidyltransferase [EC:2.7.7.8]	COG1185	J	Translation, ribosomal structure and biogenesis	PTHR11252:SF0
T303_01660	hypothetical protein	not assigned	not assigned	not assigned	not assigned	not assigned	not assigned	NOHIT
T303_01665	serine acetyltransferase	K00640	cysE	serine O-acetyltransferase [EC:2.3.1.30]	COG1045	E	Amino acid transport and metabolism	PTHR42811
T303_01670	hypothetical protein	not assigned	not assigned	not assigned	not assigned	not assigned	not assigned	NOHIT
T303_01675	cysteinyl-tRNA synthease	K01883	CARS, cysS	cysteinyl-tRNA synthetase [EC:6.1.1.16]	COG0215	J	Translation, ribosomal structure and biogenesis	PTHR10890:SF21
T303_01680	Mini-ribonuclease 3	K11145	K11145	ribonuclease III family protein [EC:3.1.26.-]	COG1939	J	Translation, ribosomal structure and biogenesis	PTHR34276:SF1
T303_01685	hypothetical protein	not assigned	not assigned	not assigned	not assigned	not assigned	not assigned	NOHIT
T303_01690	hypothetical protein	not assigned	not assigned	not assigned	not assigned	not assigned	not assigned	NOHIT
T303_01695	hypothetical protein	not assigned	not assigned	not assigned	not assigned	not assigned	not assigned	NOHIT
T303_01700	rRNA methyltransferase	K03218	rlmB	23S rRNA (guanosine2251-2'-O)-methyltransferase [EC:2.1.1.185]	COG0566	J	Translation, ribosomal structure and biogenesis	PTHR46429:SF1
T303_01705	hypothetical protein	K06962	K06962	uncharacterized protein	COG3688	R	General function prediction only	PTHR34547:SF1
T303_01710	hypothetical protein	not assigned	not assigned	not assigned	COG1307	I	Lipid transport and metabolism	PTHR33434:SF3
T303_01715	hypothetical protein	not assigned	not assigned	not assigned	not assigned	not assigned	not assigned	PTHR46558
T303_01720	hypothetical protein	not assigned	not assigned	not assigned	not assigned	not assigned	not assigned	NOHIT
T303_01725	2-dehydropantoate 2-reductase	K00077	panE, apbA	2-dehydropantoate 2-reductase [EC:1.1.1.169]	COG1893	H	Coenzyme transport and metabolism	PTHR43765
T303_01730	50S ribosomal protein L13	K02871	RP-L13, MRPL13, rplM	large subunit ribosomal protein L13	COG0102	J	Translation, ribosomal structure and biogenesis	PTHR11545:SF2
T303_01735	30S ribosomal protein S9	K02996	RP-S9, MRPS9, rpsI	small subunit ribosomal protein S9	COG0103	J	Translation, ribosomal structure and biogenesis	PTHR21569:SF1
T303_01740	hypothetical protein	not assigned	not assigned	not assigned	not assigned	not assigned	not assigned	NOHIT
T303_01745	transposase IS1193	not assigned	not assigned	not assigned	COG3464	X	Mobilome - prophages, transposons	PTHR33498:SF1
T303_01750	DNA-binding protein	not assigned	not assigned	not assigned	not assigned	not assigned	not assigned	PTHR40661
T303_01755	bacteriocin	not assigned	not assigned	not assigned	not assigned	not assigned	not assigned	NOHIT
T303_01765	lantibiotic biosynthesis protein	K20484	nisC, spaC, epiC	lantibiotic biosynthesis protein	not assigned	not assigned	not assigned	PTHR12736
T303_01770	lantibiotic transporter	not assigned	not assigned	not assigned	not assigned	not assigned	not assigned	PTHR43266:SF5
T303_01775	ATP-dependent DNA helicase recG	not assigned	not assigned	not assigned	not assigned	not assigned	not assigned	PTHR30595:SF6
T303_01785	Fis family transcriptional regulator	not assigned	not assigned	not assigned	not assigned	not assigned	not assigned	NOHIT
T303_01790	hypothetical protein	not assigned	not assigned	not assigned	not assigned	not assigned	not assigned	NOHIT
T303_01795	hypothetical protein	not assigned	not assigned	not assigned	not assigned	not assigned	not assigned	NOHIT
T303_01800	hypothetical protein	not assigned	not assigned	not assigned	COG3942	M	Cell wall/membrane/envelope biogenesis	NOHIT
T303_01810	metallophosphatase	K07282	capA, pgsA	gamma-polyglutamate biosynthesis protein CapA	COG2843	M	Cell wall/membrane/envelope biogenesis	PTHR33393:SF10
T303_01815	hypothetical protein	K07166	K07166	ACT domain-containing protein	COG3830	T	Signal transduction mechanisms	PTHR34875:SF2
T303_01820	hypothetical protein	K09157	K09157	uncharacterized protein	COG2848	D	Cell cycle control, cell division, chromosome partitioning	PTHR37560:SF3
T303_01825	hypothetical protein	K15634	gpmB	probable phosphoglycerate mutase [EC:5.4.2.12]	not assigned	not assigned	not assigned	PTHR23029:SF83
T303_01830	D-alanyl-D-alanine carboxypeptidase	K07260	vanY	zinc D-Ala-D-Ala carboxypeptidase [EC:3.4.17.14]	COG1876	M	Cell wall/membrane/envelope biogenesis	PTHR34385:SF1
T303_01835	peptidoglycan hydrolase	not assigned	not assigned	not assigned	COG1705	M,N	Cell wall/membrane/envelope biogenesis	PTHR33308:SF8
T303_01840	HrcA family transcriptional regulator	K03705	hrcA	heat-inducible transcriptional repressor	COG1420	K	Transcription	PTHR34824:SF1
T303_01845	heat shock protein GrpE	K03687	GRPE	molecular chaperone GrpE	COG0576	O	Posttranslational modification, protein turnover, chaperones	PTHR21237:SF23
T303_01850	molecular chaperone DnaK	K04043	dnaK, HSPA9	molecular chaperone DnaK	COG0443	O	Posttranslational modification, protein turnover, chaperones	PTHR19375:SF147
T303_01855	molecular chaperone DnaJ	K03686	dnaJ	molecular chaperone DnaJ	COG0484	O	Posttranslational modification, protein turnover, chaperones	PTHR43096:SF34
T303_01860	tRNA pseudouridine synthase A	K06173	truA, PUS1	tRNA pseudouridine38-40 synthase [EC:5.4.99.12]	COG0101	J	Translation, ribosomal structure and biogenesis	PTHR11142:SF0
T303_01865	phosphomethylpyrimidine kinase	K00868	pdxK, pdxY	pyridoxine kinase [EC:2.7.1.35]	COG0351	H	Coenzyme transport and metabolism	PTHR20858:SF19
T303_01870	membrane protein	not assigned	not assigned	not assigned	COG4720	S	Function unknown	PTHR37815
T303_01875	16S ribosomal RNA	K01977	16SrRNA, rrs	16S ribosomal RNA	not assigned	not assigned	not assigned	NOHIT
T303_01880	tRNA Ala	K14218	tRNA-Ala	tRNA Ala	not assigned	not assigned	not assigned	NOHIT
T303_01885	23S ribosomal RNA	K01980	23SrRNA, rrl	23S ribosomal RNA	not assigned	not assigned	not assigned	NOHIT
T303_01890	5S ribosomal RNA	K01985	5SrRNA, rrf	5S ribosomal RNA	not assigned	not assigned	not assigned	NOHIT
T303_01895	tRNA Asn	K14220	tRNA-Asn	tRNA Asn	not assigned	not assigned	not assigned	NOHIT
T303_01900	hypothetical protein	not assigned	not assigned	not assigned	not assigned	not assigned	not assigned	NOHIT
T303_01905	CpsL protein	not assigned	not assigned	not assigned	not assigned	not assigned	not assigned	NOHIT
T303_01910	aminoacylase	not assigned	not assigned	not assigned	not assigned	not assigned	not assigned	PTHR11014:SF121
T303_01915	cyclopropane-fatty-acyl-phospholipid synthase	K00574	cfa	cyclopropane-fatty-acyl-phospholipid synthase [EC:2.1.1.79]	COG2230	I	Lipid transport and metabolism	PTHR43667:SF1
T303_01920	transposase IS1167	not assigned	not assigned	not assigned	not assigned	not assigned	not assigned	PTHR33498:SF1
T303_01925	RNA polymerase sigma70	K12296	comX1_2	competence protein ComX	not assigned	not assigned	not assigned	PTHR30385:SF7
T303_01930	mechanosensitive ion channel protein	K03442	mscS	small conductance mechanosensitive channel	COG0668	M	Cell wall/membrane/envelope biogenesis	PTHR30460:SF0
T303_01935	trigger factor	K03545	tig	trigger factor	COG0544	O	Posttranslational modification, protein turnover, chaperones	PTHR30560:SF3
T303_01940	DNA-directed RNA polymerase subunit delta	K03048	rpoE	DNA-directed RNA polymerase subunit delta	COG3343	K	Transcription	NOHIT
T303_01945	CTP synthetase	K01937	pyrG, CTPS	CTP synthase [EC:6.3.4.2]	COG0504	F	Nucleotide transport and metabolism	PTHR11550:SF0
T303_01950	hypothetical protein	not assigned	not assigned	not assigned	not assigned	not assigned	not assigned	NOHIT
T303_01955	DNA mismatch repair protein MutT	K03574	mutT, NUDT15, MTH2	8-oxo-dGTP diphosphatase [EC:3.6.1.55]	not assigned	not assigned	not assigned	PTHR43736:SF1
T303_01960	ribosomal protein L11 methyltransferase	K02687	prmA	ribosomal protein L11 methyltransferase [EC:2.1.1.-]	COG2264	J	Translation, ribosomal structure and biogenesis	PTHR43648:SF1
T303_01965	16S rRNA methyltransferase	K09761	rsmE	16S rRNA (uracil1498-N3)-methyltransferase [EC:2.1.1.193]	COG1385	J	Translation, ribosomal structure and biogenesis	PTHR30027:SF3
T303_01970	2', 3'-cyclic nucleotide 2'-phosphodiesterase	K01119	cpdB	2',3'-cyclic-nucleotide 2'-phosphodiesterase / 3'-nucleotidase [EC:3.1.4.16 3.1.3.6]	COG0737	F,V	Nucleotide transport and metabolism	PTHR11575:SF6
T303_01975	flavoprotein	K03647	nrdI	protein involved in ribonucleotide reduction	COG1780	F	Nucleotide transport and metabolism	PTHR37297:SF1
T303_01980	GTP pyrophosphokinase	K00951	relA	GTP pyrophosphokinase [EC:2.7.6.5]	COG0317	K,T	Transcription	PTHR21262:SF0
T303_01985	D-tyrosyl-tRNA(Tyr) deacylase	K07560	dtd, DTD	D-aminoacyl-tRNA deacylase [EC:3.1.1.96]	COG1490	J	Translation, ribosomal structure and biogenesis	PTHR10472:SF5
T303_01990	hypothetical protein	not assigned	not assigned	not assigned	not assigned	not assigned	not assigned	NOHIT
T303_02000	1,6-alpha-glucanhydrolase	not assigned	not assigned	not assigned	not assigned	not assigned	not assigned	NOHIT
T303_02005	threonine dehydratase	K01754	E4.3.1.19, ilvA, tdcB	threonine dehydratase [EC:4.3.1.19]	COG1171	E	Amino acid transport and metabolism	PTHR43714:SF1
T303_02010	peptide deformylase	K01462	PDF, def	peptide deformylase [EC:3.5.1.88]	COG0242	J	Translation, ribosomal structure and biogenesis	PTHR10458:SF8
T303_02015	Crp/Fnr family transcriptional regulator	not assigned	not assigned	not assigned	COG0664	T	Signal transduction mechanisms	PTHR24567:SF26
T303_02020	permease of the major facilitator superfamily	not assigned	not assigned	not assigned	COG2271	G	Carbohydrate transport and metabolism	PTHR23517:SF2
T303_02025	30S ribosomal protein S15	K02956	RP-S15, MRPS15, rpsO	small subunit ribosomal protein S15	COG0184	J	Translation, ribosomal structure and biogenesis	PTHR23321:SF26
T303_02030	glycopeptide antibiotics resistance protein	not assigned	not assigned	not assigned	not assigned	not assigned	not assigned	PTHR36834
T303_02035	hypothetical protein	not assigned	not assigned	not assigned	not assigned	not assigned	not assigned	NOHIT
T303_02040	hypothetical protein	not assigned	not assigned	not assigned	not assigned	not assigned	not assigned	NOHIT
T303_02045	hypothetical protein	not assigned	not assigned	not assigned	not assigned	not assigned	not assigned	NOHIT
T303_02050	peptide ABC transporter ATP-binding protein	K17076	K17076, lysY	putative lysine transport system ATP-binding protein [EC:3.6.3.-]	COG1126	E	Amino acid transport and metabolism	PTHR43166:SF20
T303_02055	glutamine ABC transporter substrate-binding protein	K17073	lysX1	putative lysine transport system substrate-binding protein	COG0765	E	Amino acid transport and metabolism	PTHR30614:SF20
T303_02060	UDP pyrophosphate phosphatase	K06153	bacA	undecaprenyl-diphosphatase [EC:3.6.1.27]	COG1968	I	Lipid transport and metabolism	PTHR30622:SF3
T303_02065	adapter protein mecA	K16511	mecA1_2	adapter protein MecA 1/2	COG4862	T,N,K	Signal transduction mechanisms	PTHR39161:SF1
T303_02070	UDP-N-acetylglucosamine:UDP-P N-acetylglucosaminyl-1-P transferase	K02851	wecA, tagO, rfe	UDP-GlcNAc:undecaprenyl-phosphate/decaprenyl-phosphate GlcNAc-1-phosphate transferase [EC:2.7.8.33 2.7.8.35]	COG0472	M	Cell wall/membrane/envelope biogenesis	PTHR22926:SF3
T303_02075	iron ABC transporter ATP-binding protein	K09013	sufC	Fe-S cluster assembly ATP-binding protein	COG0396	O	Posttranslational modification, protein turnover, chaperones	PTHR43204:SF1
T303_02080	Fe-S cluster assembly protein SufD	K09015	sufD	Fe-S cluster assembly protein SufD	COG0719	O	Posttranslational modification, protein turnover, chaperones	PTHR43575:SF1
T303_02085	cysteine desulfurase	K11717	sufS	cysteine desulfurase / selenocysteine lyase [EC:2.8.1.7 4.4.1.16]	COG0520	E	Amino acid transport and metabolism	PTHR43586:SF12
T303_02090	Fe-S assembly protein NifU	K04488	iscU, nifU	nitrogen fixation protein NifU and related proteins	COG0822	O	Posttranslational modification, protein turnover, chaperones	PTHR10093:SF8
T303_02095	Fe-S cluster assembly protein SufB	K09014	sufB	Fe-S cluster assembly protein SufB	COG0719	O	Posttranslational modification, protein turnover, chaperones	PTHR30508:SF1
T303_02100	hypothetical protein	not assigned	not assigned	not assigned	not assigned	not assigned	not assigned	NOHIT
T303_02105	membrane protein	K15580	oppA, mppA	oligopeptide transport system substrate-binding protein	not assigned	not assigned	not assigned	PTHR30290:SF10
T303_02110	membrane protein	K15581	oppB	oligopeptide transport system permease protein	not assigned	not assigned	not assigned	PTHR30465:SF93
T303_02115	hypothetical protein	not assigned	not assigned	not assigned	not assigned	not assigned	not assigned	NOHIT
T303_02120	hypothetical protein	K15582	oppC	oligopeptide transport system permease protein	not assigned	not assigned	not assigned	PTHR43386:SF2
T303_02125	peptide ABC transporter permease	K15582	oppC	oligopeptide transport system permease protein	not assigned	not assigned	not assigned	PTHR43386:SF2
T303_02130	peptide ABC transporter ATP-binding protein	K15583	oppD	oligopeptide transport system ATP-binding protein	not assigned	not assigned	not assigned	PTHR24220:SF607
T303_02145	hypothetical protein	not assigned	not assigned	not assigned	not assigned	not assigned	not assigned	NOHIT
T303_02150	heat shock protein Hsp33	K04083	hslO	molecular chaperone Hsp33	COG1281	O	Posttranslational modification, protein turnover, chaperones	PTHR30111:SF1
T303_02155	tRNA-dihydrouridine synthase	not assigned	not assigned	not assigned	COG0042	J	Translation, ribosomal structure and biogenesis	PTHR11082:SF25
T303_02160	peptidase	not assigned	not assigned	not assigned	not assigned	not assigned	not assigned	PTHR23513
T303_02165	MarR family transcriptional regulator	not assigned	not assigned	not assigned	COG1846	K	Transcription	PTHR42742:SF7
T303_02170	zinc ABC transporter ATP-binding protein	K09817	znuC	zinc transport system ATP-binding protein [EC:3.6.3.-]	COG1121	P	Inorganic ion transport and metabolism	PTHR42734:SF4
T303_02175	zinc ABC transporter permease	K09816	znuB	zinc transport system permease protein	COG1108	P	Inorganic ion transport and metabolism	PTHR30477:SF20
T303_02180	malate transporter	K07088	K07088	uncharacterized protein	COG0679	R	General function prediction only	PTHR36838:SF1
T303_02190	metal-dependent hydrolase	K06896	mapP	maltose 6'-phosphate phosphatase [EC:3.1.3.90]	COG3568	R	General function prediction only	PTHR15822:SF13
T303_02195	glucose-6-phosphate isomerase	K01810	GPI, pgi	glucose-6-phosphate isomerase [EC:5.3.1.9]	COG0166	G	Carbohydrate transport and metabolism	PTHR11469:SF1
T303_02200	hypothetical protein	not assigned	not assigned	not assigned	COG0217	K,J	Transcription	PTHR12532
T303_02205	preprotein translocase subunit YajC	K03210	yajC	preprotein translocase subunit YajC	COG1862	U	Intracellular trafficking, secretion, and vesicular transport	PTHR33909:SF1
T303_02210	UDP pyrophosphate synthase	K00806	uppS	undecaprenyl diphosphate synthase [EC:2.5.1.31]	COG0020	I	Lipid transport and metabolism	PTHR10291:SF0
T303_02215	cytidylyltransferase	K00981	E2.7.7.41, CDS1, CDS2, cdsA	phosphatidate cytidylyltransferase [EC:2.7.7.41]	COG0575	I	Lipid transport and metabolism	PTHR46382:SF1
T303_02220	metalloprotease RseP	K11749	rseP	regulator of sigma E protease [EC:3.4.24.-]	COG0750	O,K	Posttranslational modification, protein turnover, chaperones	PTHR42837:SF2
T303_02225	prolyl-tRNA synthetase	K01881	PARS, proS	prolyl-tRNA synthetase [EC:6.1.1.15]	COG0442	J	Translation, ribosomal structure and biogenesis	PTHR42753:SF2
T303_02230	ABC transporter permease	not assigned	not assigned	not assigned	COG2984	R	General function prediction only	PTHR35271:SF1
T303_02235	ABC transporter ATP-binding protein	K05833	ABC.X4.A	putative ABC transport system ATP-binding protein	COG1101	R	General function prediction only	PTHR42788:SF12
T303_02240	molecular chaperone GroES	K04078	groES, HSPE1	chaperonin GroES	COG0234	O	Posttranslational modification, protein turnover, chaperones	PTHR10772:SF24
T303_02245	molecular chaperone GroEL	K04077	groEL, HSPD1	chaperonin GroEL	COG0459	O	Posttranslational modification, protein turnover, chaperones	PTHR45633
T303_02265	hypothetical protein	not assigned	not assigned	not assigned	not assigned	not assigned	not assigned	NOHIT
T303_02270	hypothetical protein	not assigned	not assigned	not assigned	not assigned	not assigned	not assigned	NOHIT
T303_02280	RNA pseudouridylate synthase	K06180	rluD	23S rRNA pseudouridine1911/1915/1917 synthase [EC:5.4.99.23]	COG0564	J	Translation, ribosomal structure and biogenesis	PTHR21600:SF36
T303_02285	penicillin-binding protein 2A	K12555	pbp2A	penicillin-binding protein 2A [EC:2.4.1.129 3.4.16.4]	COG0744	M	Cell wall/membrane/envelope biogenesis	PTHR32282:SF21
T303_02290	preprotein translocase subunit SecE	K03073	secE	preprotein translocase subunit SecE	COG0690	U	Intracellular trafficking, secretion, and vesicular transport	PTHR33910:SF1
T303_02295	transcription antitermination protein NusG	K02601	nusG	transcriptional antiterminator NusG	COG0250	K	Transcription	PTHR30265:SF2
T303_02300	phosphoesterase	not assigned	not assigned	not assigned	not assigned	not assigned	not assigned	PTHR14969:SF40
T303_02310	cytochrome C	not assigned	not assigned	not assigned	COG1349	K,G	Transcription	PTHR30363:SF45
T303_02315	leucyl-tRNA synthase	K01869	LARS, leuS	leucyl-tRNA synthetase [EC:6.1.1.4]	COG0495	J	Translation, ribosomal structure and biogenesis	PTHR43740:SF2
T303_02330	nicotinate phosphoribosyltransferase	K00763	pncB, NAPRT1	nicotinate phosphoribosyltransferase [EC:6.3.4.21]	COG1488	H	Coenzyme transport and metabolism	PTHR11098
T303_02335	NAD synthetase	K01916	nadE	NAD+ synthase [EC:6.3.1.5]	COG0171	H	Coenzyme transport and metabolism	PTHR23090:SF7
T303_02340	membrane protein	not assigned	not assigned	not assigned	COG3152	S	Function unknown	PTHR34980:SF2
T303_02345	aminopeptidase C	K01372	BLMH, pepC	bleomycin hydrolase [EC:3.4.22.40]	COG3579	E	Amino acid transport and metabolism	PTHR10363:SF4
T303_02350	penicillin-binding protein 1A	K05366	mrcA	penicillin-binding protein 1A [EC:2.4.1.129 3.4.16.4]	COG0744	M	Cell wall/membrane/envelope biogenesis	PTHR32282:SF22
T303_02355	Holliday junction resolvase	K03700	recU	recombination protein U	COG3331	R	General function prediction only	NOHIT
T303_02360	hypothetical protein	not assigned	not assigned	not assigned	COG4474	X	Mobilome - prophages, transposons	PTHR38440:SF1
T303_02365	cell division protein GpsB	not assigned	not assigned	not assigned	not assigned	not assigned	not assigned	PTHR35794:SF1
T303_02370	M1 RNA	K01978	rnpB	M1 RNA	not assigned	not assigned	not assigned	NOHIT
T303_02375	RNA methyltransferase	K07444	ypsC	putative N6-adenine-specific DNA methylase [EC:2.1.1.-]	COG0116	J	Translation, ribosomal structure and biogenesis	PTHR47313:SF1
T303_02380	hypothetical protein	K20073	mapZ, locZ	mid-cell-anchored protein Z	not assigned	not assigned	not assigned	NOHIT
T303_02385	RNA helicase	not assigned	not assigned	not assigned	not assigned	not assigned	not assigned	PTHR10799:SF960
T303_02390	hypothetical protein	not assigned	not assigned	not assigned	not assigned	not assigned	not assigned	NOHIT
T303_02395	UDP-N-acetylmuramate--alanine ligase	K01924	murC	UDP-N-acetylmuramate--alanine ligase [EC:6.3.2.8]	COG0773	M	Cell wall/membrane/envelope biogenesis	PTHR43445:SF3
T303_02400	GNAT family acetyltransferase	not assigned	not assigned	not assigned	not assigned	not assigned	not assigned	PTHR10908:SF3
T303_02405	aminodeoxychorismate lyase	K07082	K07082	UPF0755 protein	COG1559	D	Cell cycle control, cell division, chromosome partitioning	PTHR30518:SF2
T303_02410	transcription elongation factor GreA	K03624	greA	transcription elongation factor GreA	COG0782	K	Transcription	PTHR30437:SF4
T303_02415	hypothetical protein	not assigned	not assigned	not assigned	not assigned	not assigned	not assigned	NOHIT
T303_02420	transposase	not assigned	not assigned	not assigned	not assigned	not assigned	not assigned	NOHIT
T303_02430	cytochrome oxidase biogenesis protein OxaA	K03217	yidC, spoIIIJ, OXA1, ccfA	YidC/Oxa1 family membrane protein insertase	COG0706	M	Cell wall/membrane/envelope biogenesis	PTHR12428:SF35
T303_02435	acylphosphatase	K01512	acyP	acylphosphatase [EC:3.6.1.7]	COG1254	C	Energy production and conversion	PTHR47268:SF2
T303_02440	23S rRNA methyltransferase	K03437	spoU	RNA methyltransferase, TrmH family	COG0566	J	Translation, ribosomal structure and biogenesis	PTHR43191:SF4
T303_02450	membrane protein	K06890	K06890	uncharacterized protein	COG0670	R	General function prediction only	PTHR23291:SF50
T303_02455	hypothetical protein	not assigned	not assigned	not assigned	not assigned	not assigned	not assigned	NOHIT
T303_02460	hypothetical protein	not assigned	not assigned	not assigned	not assigned	not assigned	not assigned	NOHIT
T303_02465	diaminopimelate decarboxylase	K01586	lysA	diaminopimelate decarboxylase [EC:4.1.1.20]	COG0019	E	Amino acid transport and metabolism	PTHR43727:SF2
T303_02470	TetR family transcriptional regulator	not assigned	not assigned	not assigned	not assigned	not assigned	not assigned	PTHR43479
T303_02475	hypothetical protein	K09976	K09976	uncharacterized protein	COG3763	S	Function unknown	NOHIT
T303_02480	glutamate racemase	K01776	murI	glutamate racemase [EC:5.1.1.3]	COG0796	M	Cell wall/membrane/envelope biogenesis	PTHR21198:SF2
T303_02485	deoxyribonucleotide triphosphate pyrophosphatase	K02428	rdgB	XTP/dITP diphosphohydrolase [EC:3.6.1.66]	COG0127	F	Nucleotide transport and metabolism	PTHR11067:SF9
T303_02490	metallophosphoesterase	K07095	K07095	uncharacterized protein	COG0622	R	General function prediction only	PTHR11124:SF12
T303_02495	hypothetical protein	not assigned	not assigned	not assigned	not assigned	not assigned	not assigned	PTHR43803:SF3
T303_02500	tyrosine recombinase XerD	not assigned	not assigned	not assigned	COG4974	L	Replication, recombination and repair	PTHR30349:SF41
T303_02505	segregation and condensation protein A	K05896	scpA	segregation and condensation protein A	COG1354	L	Replication, recombination and repair	PTHR33969:SF2
T303_02510	segregation protein A	K06024	scpB	segregation and condensation protein B	COG1386	K	Transcription	PTHR34298:SF2
T303_02515	ribosomal large subunit pseudouridine synthase B	K06178	rluB	23S rRNA pseudouridine2605 synthase [EC:5.4.99.22]	COG1187	J	Translation, ribosomal structure and biogenesis	PTHR21600:SF2
T303_02520	membrane protein	K08998	K08998	uncharacterized protein	COG0759	M	Cell wall/membrane/envelope biogenesis	PTHR33383:SF1
T303_02525	potassium transporter Trk	K03498	trkH, trkG, ktrB	trk system potassium uptake protein	COG0168	P	Inorganic ion transport and metabolism	PTHR32024:SF2
T303_02530	potassium transporter TrkA	K03499	trkA, ktrA	trk system potassium uptake protein	COG0569	P	Inorganic ion transport and metabolism	PTHR43004:SF2
T303_02535	RNA methyltransferase	K03216	trmL, cspR	tRNA (cytidine/uridine-2'-O-)-methyltransferase [EC:2.1.1.207]	COG0219	J	Translation, ribosomal structure and biogenesis	PTHR42971:SF1
T303_02540	riboflavin transporter	not assigned	not assigned	not assigned	COG3601	H	Coenzyme transport and metabolism	PTHR38438:SF1
T303_02545	phosphatase	K19302	bcrC	undecaprenyl-diphosphatase [EC:3.6.1.27]	COG0671	I	Lipid transport and metabolism	PTHR14969:SF13
T303_02550	XRE family transcriptional regulator	K20342	comR	HTH-type transcriptional regulator, regulator for ComX	not assigned	not assigned	not assigned	PTHR46797
T303_02560	membrane protein	not assigned	not assigned	not assigned	COG3152	S	Function unknown	PTHR34980
T303_02570	hypothetical protein	not assigned	not assigned	not assigned	not assigned	not assigned	not assigned	NOHIT
T303_02575	urease accessory protein	K03191	ureI	acid-activated urea channel	not assigned	not assigned	not assigned	NOHIT
T303_02580	urease subunit gamma	K01430	ureA	urease subunit gamma [EC:3.5.1.5]	COG0831	E	Amino acid transport and metabolism	PTHR33569:SF1
T303_02585	urease subunit beta	K01429	ureB	urease subunit beta [EC:3.5.1.5]	COG0832	E	Amino acid transport and metabolism	PTHR33569:SF1
T303_02590	urease subunit alpha	K01428	ureC	urease subunit alpha [EC:3.5.1.5]	COG0804	E	Amino acid transport and metabolism	PTHR43440:SF1
T303_02595	urease accessory protein UreE	K03187	ureE	urease accessory protein	COG2371	O	Posttranslational modification, protein turnover, chaperones	PTHR33620:SF2
T303_02600	urease accessory protein UreF	K03188	ureF	urease accessory protein	COG0830	O	Posttranslational modification, protein turnover, chaperones	PTHR33620:SF1
T303_02605	urease accessory protein UreG	K03189	ureG	urease accessory protein	COG0378	O	Posttranslational modification, protein turnover, chaperones	PTHR31715:SF0
T303_02610	urease accessory protein UreD	K03190	ureD, ureH	urease accessory protein	COG0829	O	Posttranslational modification, protein turnover, chaperones	PTHR33643:SF1
T303_02615	cobalt transporter CbiM	K02007	cbiM	cobalt/nickel transport system permease protein	COG0310	P	Inorganic ion transport and metabolism	PTHR34229:SF1
T303_02620	cobalt ABC transporter permease	K02008	cbiQ	cobalt/nickel transport system permease protein	COG0619	H	Coenzyme transport and metabolism	PTHR34857:SF2
T303_02625	cobalt ABC transporter ATP-binding protein	K02006	cbiO	cobalt/nickel transport system ATP-binding protein	COG1122	P,R	Inorganic ion transport and metabolism	PTHR43553:SF1
T303_02630	amino acid ABC transporter substrate-binding protein	K02030	ABC.PA.S	polar amino acid transport system substrate-binding protein	COG0834	E,T	Amino acid transport and metabolism	PTHR35936:SF16
T303_02635	peptide synthetase	not assigned	not assigned	not assigned	not assigned	not assigned	not assigned	PTHR45527
T303_02640	NUDIX hydrolase	not assigned	not assigned	not assigned	COG0499	H	Coenzyme transport and metabolism	PTHR43222:SF1
T303_02645	macrolide ABC transporter permease	not assigned	not assigned	not assigned	not assigned	not assigned	not assigned	PTHR23513:SF6
T303_02655	amino acid ABC transporter substrate-binding protein	K02030	ABC.PA.S	polar amino acid transport system substrate-binding protein	COG0834	E,T	Amino acid transport and metabolism	PTHR35936:SF16
T303_02660	O-sialoglycoprotein endopeptidase	K02073	metQ	D-methionine transport system substrate-binding protein	COG1464	P	Inorganic ion transport and metabolism	PTHR30429:SF3
T303_02670	methionine ABC transporter ATP-binding protein	K02071	metN	D-methionine transport system ATP-binding protein	COG1135	E	Amino acid transport and metabolism	PTHR43166:SF5
T303_02675	methionine ABC transporter permease	K02072	metI	D-methionine transport system permease protein	COG2011	E	Amino acid transport and metabolism	PTHR30450:SF1
T303_02680	serine/threonine transporter SstT	K07862	sstT	serine/threonine transporter	COG3633	E	Amino acid transport and metabolism	PTHR42865:SF8
T303_02685	DNA-directed RNA polymerase subunit delta	K09134	flA	adenosyl-fluoride synthase [EC:2.5.1.63]	COG1912	H	Coenzyme transport and metabolism	PTHR35092:SF1
T303_02690	membrane protein	K16924	mtsT	energy-coupling factor transport system substrate-specific component	COG4720	S	Function unknown	PTHR37815:SF3
T303_02695	heme ABC transporter ATP-binding protein	K16786	ecfA1	energy-coupling factor transport system ATP-binding protein [EC:3.6.3.-]	COG1123	O	Posttranslational modification, protein turnover, chaperones	PTHR43553:SF1
T303_02700	cobalt ABC transporter permease	K16785	ecfT	energy-coupling factor transport system permease protein	COG0619	H	Coenzyme transport and metabolism	PTHR33514:SF1
T303_02705	transketolase	K00615	E2.2.1.1, tktA, tktB	transketolase [EC:2.2.1.1]	COG0021	G	Carbohydrate transport and metabolism	PTHR43522:SF2
T303_02710	potassium transporter Trk	K03499	trkA, ktrA	trk system potassium uptake protein	COG0569	P	Inorganic ion transport and metabolism	PTHR43833:SF7
T303_02715	V-type Na+ -ATPase subunit J	not assigned	not assigned	not assigned	COG0168	P	Inorganic ion transport and metabolism	PTHR32024:SF1
T303_02720	16S rRNA methyltransferase	K03501	gidB, rsmG	16S rRNA (guanine527-N7)-methyltransferase [EC:2.1.1.170]	COG0357	J	Translation, ribosomal structure and biogenesis	PTHR31760:SF0
T303_02725	DNA-binding protein	K07040	K07040	uncharacterized protein	COG1399	S	Function unknown	PTHR34374:SF1
T303_02730	PhoB family transcriptional regulator	not assigned	not assigned	not assigned	COG0745	T,K	Signal transduction mechanisms	PTHR26402:SF736
T303_02735	sensor histidine kinase	not assigned	not assigned	not assigned	COG0642	T	Signal transduction mechanisms	PTHR45528
T303_02740	NrdR family transcriptional regulator	K07738	nrdR	transcriptional repressor NrdR	COG1327	K	Transcription	PTHR30455:SF2
T303_02745	chromosome replication initiation / membrane attachment protein DnaB	K03346	dnaB	replication initiation and membrane attachment protein	COG3611	L	Replication, recombination and repair	NOHIT
T303_02750	primosomal protein DnaI	K11144	dnaI	primosomal protein DnaI	COG1484	L	Replication, recombination and repair	PTHR30050:SF8
T303_02755	GTP-binding protein Der	K03977	engA, der	GTPase	COG1160	R	General function prediction only	PTHR43834:SF2
T303_02785	seryl-tRNA synthase	K01875	SARS, serS	seryl-tRNA synthetase [EC:6.1.1.11]	COG0172	J	Translation, ribosomal structure and biogenesis	PTHR43697:SF1
T303_02790	mannose operon ManO protein	not assigned	not assigned	not assigned	COG4687	S	Function unknown	NOHIT
T303_02795	PTS mannose transporter subunit IID	K02796	PTS-Man-EIID, manZ	PTS system, mannose-specific IID component	COG3716	G	Carbohydrate transport and metabolism	PTHR32502:SF5
T303_02800	PTS mannose transporter subunit IIC	K02795	PTS-Man-EIIC, manY	PTS system, mannose-specific IIC component	COG3715	G	Carbohydrate transport and metabolism	PTHR32502:SF25
T303_02805	PTS mannose transporter subunit IIAB	K02793	PTS-Man-EIIA, manX	PTS system, mannose-specific IIA component [EC:2.7.1.191]	COG3444	G	Carbohydrate transport and metabolism	PTHR33799:SF8
T303_02810	cyclase	not assigned	not assigned	not assigned	COG1878	E	Amino acid transport and metabolism	PTHR43564:SF2
T303_02815	HAD hydrolase	K21064	ycsE, yitU, ywtE	5-amino-6-(5-phospho-D-ribitylamino)uracil phosphatase[EC:3.1.3.104]	COG0561	R,H	General function prediction only	PTHR10000:SF23
T303_02820	guanine permease	K06901	pbuG	putative MFS transporter, AGZA family, xanthine/uracil permease	COG2252	F	Nucleotide transport and metabolism	PTHR43337:SF1
T303_02825	hydrolase	K06925	tsaE	tRNA threonylcarbamoyladenosine biosynthesis protein TsaE	COG0802	J	Translation, ribosomal structure and biogenesis	PTHR33540:SF2
T303_02830	GNAT family acetyltransferase	not assigned	not assigned	not assigned	not assigned	not assigned	not assigned	PTHR43617:SF13
T303_02835	transcriptional regulator	not assigned	not assigned	not assigned	COG1316	M	Cell wall/membrane/envelope biogenesis	PTHR33392
T303_02840	ribosome maturation protein RimP	K09748	rimP	ribosome maturation factor RimP	COG0779	J	Translation, ribosomal structure and biogenesis	PTHR33867:SF1
T303_02845	transcription elongation factor NusA	K02600	nusA	N utilization substance protein A	COG0195	K	Transcription	PTHR22648:SF0
T303_02850	hypothetical protein	K07742	ylxR	uncharacterized protein	COG2740	R	General function prediction only	PTHR34215:SF1
T303_02855	hypothetical protein	not assigned	not assigned	not assigned	COG1358	J	Translation, ribosomal structure and biogenesis	PTHR11449:SF5
T303_02860	translation initiation factor IF-2	K02519	infB, MTIF2	translation initiation factor IF-2	COG0532	J	Translation, ribosomal structure and biogenesis	PTHR43381:SF5
T303_02865	ribosome-binding factor A	K02834	rbfA	ribosome-binding factor A	COG0858	J	Translation, ribosomal structure and biogenesis	PTHR33515:SF1
T303_02880	UDP-N-acetylmuramoylalanyl-D-glutamate--2, 6-diaminopimelate ligase	K05362	murE	UDP-N-acetylmuramoyl-L-alanyl-D-glutamate-L-lysine ligase [EC:6.3.2.7]	COG0769	M	Cell wall/membrane/envelope biogenesis	PTHR23135:SF4
T303_02885	polysaccharide transporter	not assigned	not assigned	not assigned	COG2244	M	Cell wall/membrane/envelope biogenesis	PTHR30250:SF6
T303_02890	hydrolase	not assigned	not assigned	not assigned	not assigned	not assigned	not assigned	PTHR43294
T303_02895	cystathionine gamma-synthase	K01739	metB	cystathionine gamma-synthase [EC:2.5.1.48]	COG0626	E	Amino acid transport and metabolism	PTHR11808:SF61
T303_02900	cysteine desulfhydrase	K14155	patB, malY	cysteine-S-conjugate beta-lyase [EC:4.4.1.13]	COG1168	E,R	Amino acid transport and metabolism	PTHR43525
T303_02905	hypothetical protein	not assigned	not assigned	not assigned	not assigned	not assigned	not assigned	NOHIT
T303_02910	uracil phosphoribosyltransferase	K00761	upp, UPRT	uracil phosphoribosyltransferase [EC:2.4.2.9]	COG0035	F	Nucleotide transport and metabolism	PTHR10285:SF46
T303_02915	ATP-dependent Clp protease proteolytic subunit	K01358	clpP, CLPP	ATP-dependent Clp protease, protease subunit [EC:3.4.21.92]	COG0740	O	Posttranslational modification, protein turnover, chaperones	PTHR10381:SF11
T303_02920	hypothetical protein	not assigned	not assigned	not assigned	COG3679	T	Signal transduction mechanisms	PTHR38448:SF2
T303_02925	hypothetical protein	not assigned	not assigned	not assigned	COG4471	S	Function unknown	NOHIT
T303_02930	branched-chain amino acid ABC transporter substrate-binding protein	K01999	livK	branched-chain amino acid transport system substrate-binding protein	COG0683	E	Amino acid transport and metabolism	PTHR30483:SF6
T303_02935	ABC transporter permease	K01997	livH	branched-chain amino acid transport system permease protein	COG0559	E	Amino acid transport and metabolism	PTHR11795:SF371
T303_02940	branched-chain amino acid ABC transporter permease	K01998	livM	branched-chain amino acid transport system permease protein	COG4177	E	Amino acid transport and metabolism	PTHR30482:SF10
T303_02945	branched-chain amino acid ABC transporter ATP-binding protein	K01995	livG	branched-chain amino acid transport system ATP-binding protein	COG0411	E	Amino acid transport and metabolism	PTHR45772:SF7
T303_02950	amino acid ABC transporter ATPase	K01996	livF	branched-chain amino acid transport system ATP-binding protein	COG0410	E	Amino acid transport and metabolism	PTHR43820:SF4
T303_02960	cysteine synthase	K01738	cysK	cysteine synthase [EC:2.5.1.47]	COG0031	E	Amino acid transport and metabolism	PTHR10314:SF164
T303_02965	Xaa-Pro dipeptidase	not assigned	not assigned	not assigned	COG1739	R	General function prediction only	PTHR16301:SF0
T303_02970	competence protein	K02240	comFA	competence protein ComFA	COG4098	L	Replication, recombination and repair	PTHR30580:SF1
T303_02975	competence protein	K02242	comFC	competence protein ComFC	COG1040	R	General function prediction only	PTHR47505:SF1
T303_02985	16S ribosomal RNA	K01977	16SrRNA, rrs	16S ribosomal RNA	not assigned	not assigned	not assigned	NOHIT
T303_02990	tRNA Ala	K14218	tRNA-Ala	tRNA Ala	not assigned	not assigned	not assigned	NOHIT
T303_02995	23S ribosomal RNA	K01980	23SrRNA, rrl	23S ribosomal RNA	not assigned	not assigned	not assigned	NOHIT
T303_03000	5S ribosomal RNA	K01985	5SrRNA, rrf	5S ribosomal RNA	not assigned	not assigned	not assigned	NOHIT
T303_03005	tRNA Asn	K14220	tRNA-Asn	tRNA Asn	not assigned	not assigned	not assigned	NOHIT
T303_03010	tRNA Leu	K14228	tRNA-Leu	tRNA Leu	not assigned	not assigned	not assigned	NOHIT
T303_03015	tRNA Thr	K14234	tRNA-Thr	tRNA Thr	not assigned	not assigned	not assigned	NOHIT
T303_03020	tRNA Glu	K14224	tRNA-Glu	tRNA Glu	not assigned	not assigned	not assigned	NOHIT
T303_03025	inorganic diphosphatase PpaC	K15986	ppaC	manganese-dependent inorganic pyrophosphatase [EC:3.6.1.1]	COG1227	C,P	Energy production and conversion	PTHR12112:SF40
T303_03030	hypothetical protein	not assigned	not assigned	not assigned	not assigned	not assigned	not assigned	PTHR30136:SF7
T303_03035	hypothetical protein	K07586	ygaC	uncharacterized protein	COG3557	S	Function unknown	PTHR39159:SF1
T303_03040	recombinase RecX	K03565	recX	regulatory protein	COG2137	O	Posttranslational modification, protein turnover, chaperones	PTHR33602:SF1
T303_03045	RNA methyltransferase	not assigned	not assigned	not assigned	COG2265	J	Translation, ribosomal structure and biogenesis	PTHR11061:SF45
T303_03050	aspartate--ammonia ligase	K01914	asnA	aspartate--ammonia ligase [EC:6.3.1.1]	COG2502	E	Amino acid transport and metabolism	PTHR30073:SF5
T303_03055	aspartate kinase	K00928	lysC	aspartate kinase [EC:2.7.2.4]	COG0527	E	Amino acid transport and metabolism	PTHR21499:SF49
T303_03060	HAD family hydrolase	not assigned	not assigned	not assigned	COG0637	R,G	General function prediction only	PTHR46193
T303_03065	enoyl-CoA hydratase	K18474	fabM	trans-2-decenoyl-[acyl-carrier protein] isomerase [EC:5.3.3.14]	COG1024	I	Lipid transport and metabolism	PTHR11941:SF76
T303_03070	MarR family transcriptional regulator	not assigned	not assigned	not assigned	COG1846	K	Transcription	PTHR33164:SF52
T303_03075	3-oxoacyl-ACP synthase	K00648	fabH	3-oxoacyl-[acyl-carrier-protein] synthase III [EC:2.3.1.180]	COG0332	I	Lipid transport and metabolism	PTHR43091
T303_03080	acyl carrier protein	K02078	acpP	acyl carrier protein	COG0236	I,Q	Lipid transport and metabolism	PTHR20863:SF28
T303_03085	2-nitropropane dioxygenase	K02371	fabK	enoyl-[acyl-carrier protein] reductase II [EC:1.3.1.9]	COG2070	R	General function prediction only	PTHR32332:SF20
T303_03090	ACP S-malonyltransferase	K00645	fabD	[acyl-carrier-protein] S-malonyltransferase [EC:2.3.1.39]	COG0331	I	Lipid transport and metabolism	PTHR42681:SF1
T303_03095	3-ketoacyl-ACP reductase	K00059	fabG	3-oxoacyl-[acyl-carrier protein] reductase [EC:1.1.1.100]	COG1028	I,R,Q	Lipid transport and metabolism	PTHR42879:SF2
T303_03100	3-oxoacyl-ACP synthase	K09458	fabF	3-oxoacyl-[acyl-carrier-protein] synthase II [EC:2.3.1.179]	COG0304	I,Q	Lipid transport and metabolism	PTHR11712:SF297
T303_03105	acetyl-CoA carboxylase biotin carboxyl carrier protein subunit	K02160	accB, bccP	acetyl-CoA carboxylase biotin carboxyl carrier protein	COG0511	I,H	Lipid transport and metabolism	PTHR43416:SF4
T303_03110	3-hydroxyacyl-ACP dehydratase	K02372	fabZ	3-hydroxyacyl-[acyl-carrier-protein] dehydratase [EC:4.2.1.59]	COG0764	I	Lipid transport and metabolism	PTHR30272:SF1
T303_03115	acetyl-CoA carboxylase biotin carboxylase subunit	K01961	accC	acetyl-CoA carboxylase, biotin carboxylase subunit [EC:6.4.1.2 6.3.4.14]	COG0439	I	Lipid transport and metabolism	PTHR42761:SF2
T303_03120	acetyl-CoA carboxylase subunit beta	K01963	accD	acetyl-CoA carboxylase carboxyl transferase subunit beta [EC:6.4.1.2 2.1.3.15]	COG0777	I	Lipid transport and metabolism	PTHR42995:SF2
T303_03125	acetyl-CoA carboxylase subunit alpha	K01962	accA	acetyl-CoA carboxylase carboxyl transferase subunit alpha [EC:6.4.1.2 2.1.3.15]	COG0825	I	Lipid transport and metabolism	PTHR42853
T303_03130	S-ribosylhomocysteinase	K07173	luxS	S-ribosylhomocysteine lyase [EC:4.4.1.21]	COG1854	T	Signal transduction mechanisms	PTHR35799:SF1
T303_03140	ribonuclease	K18682	rny	ribonucrease Y [EC:3.1.-.-]	COG1418	J,R	Translation, ribosomal structure and biogenesis	PTHR12826:SF15
T303_03150	DeoR family transcriptional regulator	K03436	fruR2, fruR	DeoR family transcriptional regulator, fructose operon transcriptional repressor	COG1349	K,G	Transcription	PTHR30363:SF4
T303_03155	6-phosphofructokinase	K00882	fruK	1-phosphofructokinase [EC:2.7.1.56]	COG1105	G	Carbohydrate transport and metabolism	PTHR46566:SF1
T303_03165	glutathione reductase	K00383	GSR, gor	glutathione reductase (NADPH) [EC:1.8.1.7]	COG1249	C	Energy production and conversion	PTHR42737:SF2
T303_03170	folylpolyglutamate synthase	K11754	folC	dihydrofolate synthase / folylpolyglutamate synthase [EC:6.3.2.12 6.3.2.17]	COG0285	H	Coenzyme transport and metabolism	PTHR11136:SF0
T303_03175	hypothetical protein	not assigned	not assigned	not assigned	not assigned	not assigned	not assigned	PTHR11003:SF18
T303_03180	aminotransferase V	K04487	iscS, NFS1	cysteine desulfurase [EC:2.8.1.7]	COG1104	E	Amino acid transport and metabolism	PTHR11601:SF50
T303_03185	thiamine biosynthesis protein ThiI	K03151	thiI	tRNA uracil 4-sulfurtransferase [EC:2.8.1.4]	COG0301	H,J	Coenzyme transport and metabolism	PTHR43209:SF1
T303_03190	glycosyl transferase family 4	not assigned	not assigned	not assigned	COG0438	M	Cell wall/membrane/envelope biogenesis	PTHR12526
T303_03195	accessory Sec system glycosyltransferase GtfB	not assigned	not assigned	not assigned	not assigned	not assigned	not assigned	NOHIT
T303_03200	hypothetical protein	not assigned	not assigned	not assigned	not assigned	not assigned	not assigned	NOHIT
T303_03205	50S ribosomal protein L21	K02888	RP-L21, MRPL21, rplU	large subunit ribosomal protein L21	COG0261	J	Translation, ribosomal structure and biogenesis	PTHR21349
T303_03210	50S ribosomal protein L27	K02899	RP-L27, MRPL27, rpmA	large subunit ribosomal protein L27	COG0211	J	Translation, ribosomal structure and biogenesis	PTHR15893
T303_03215	acetyltransferase	not assigned	not assigned	not assigned	COG1670	J,O	Translation, ribosomal structure and biogenesis	PTHR43441:SF2
T303_03220	transposase	not assigned	not assigned	not assigned	COG4835	S	Function unknown	NOHIT
T303_03230	dihydrodipicolinate reductase	K00215	dapB	4-hydroxy-tetrahydrodipicolinate reductase [EC:1.17.1.8]	COG0289	E	Amino acid transport and metabolism	PTHR20836:SF0
T303_03235	CCA-adding protein	K00974	cca	tRNA nucleotidyltransferase (CCA-adding enzyme) [EC:2.7.7.72 3.1.3.-3.1.4.-]	COG0617	J	Translation, ribosomal structure and biogenesis	PTHR46173:SF1
T303_03240	antibiotic ABC transporter ATP-binding protein	K15738	uup	ABC transport system ATP-binding/permease protein	COG0488	R	General function prediction only	PTHR42855:SF1
T303_03245	hypothetical protein	not assigned	not assigned	not assigned	COG3247	S	Function unknown	PTHR34989:SF1
T303_03250	DNA mismatch repair protein MutT	not assigned	not assigned	not assigned	COG1051	F	Nucleotide transport and metabolism	PTHR43736:SF1
T303_03255	transcriptional regulator	not assigned	not assigned	not assigned	COG3172	H	Coenzyme transport and metabolism	PTHR37512:SF1
T303_03260	glutamate dehydrogenase	K00262	E1.4.1.4, gdhA	glutamate dehydrogenase (NADP+) [EC:1.4.1.4]	COG0334	E	Amino acid transport and metabolism	PTHR43571:SF1
T303_03265	peptide deformylase	K01462	PDF, def	peptide deformylase [EC:3.5.1.88]	COG0242	J	Translation, ribosomal structure and biogenesis	PTHR10458:SF14
T303_03270	MarR family transcriptional regulator	not assigned	not assigned	not assigned	COG1846	K	Transcription	PTHR33164:SF50
T303_03275	ABC transporter	K06147	ABCB-BAC	ATP-binding cassette, subfamily B, bacterial	COG1132	V	Defense mechanisms	PTHR24221:SF276
T303_03280	ABC transporter	K06147	ABCB-BAC	ATP-binding cassette, subfamily B, bacterial	COG1132	V	Defense mechanisms	PTHR24222
T303_03295	uridylate kinase	K09903	pyrH	uridylate kinase [EC:2.7.4.22]	COG0528	F	Nucleotide transport and metabolism	PTHR42833
T303_03300	ribosome recycling factor	K02838	frr, MRRF, RRF	ribosome recycling factor	COG0233	J	Translation, ribosomal structure and biogenesis	PTHR20982:SF8
T303_03305	S1 RNA-binding protein	K00243	K00243	uncharacterized protein	COG2996	R	General function prediction only	PTHR37296:SF1
T303_03310	hypothetical protein	not assigned	not assigned	not assigned	COG4479	S	Function unknown	NOHIT
T303_03315	peptigoglycan-binding protein LysM	not assigned	not assigned	not assigned	COG3942	M	Cell wall/membrane/envelope biogenesis	NOHIT
T303_03320	hypothetical protein	not assigned	not assigned	not assigned	not assigned	not assigned	not assigned	PTHR17384:SF7
T303_03325	phosphate starvation-inducible protein PhoH	K06217	phoH, phoL	phosphate starvation-inducible protein PhoH and related proteins	COG1702	T	Signal transduction mechanisms	PTHR30473:SF1
T303_03330	hypothetical protein	not assigned	not assigned	not assigned	not assigned	not assigned	not assigned	NOHIT
T303_03335	hypothetical protein	not assigned	not assigned	not assigned	not assigned	not assigned	not assigned	NOHIT
T303_03340	hypothetical protein	not assigned	not assigned	not assigned	not assigned	not assigned	not assigned	NOHIT
T303_03345	hypothetical protein	not assigned	not assigned	not assigned	not assigned	not assigned	not assigned	NOHIT
T303_03350	methionyl-tRNA synthetase	K01874	MARS, metG	methionyl-tRNA synthetase [EC:6.1.1.10]	COG0143	J	Translation, ribosomal structure and biogenesis	PTHR43326:SF1
T303_03355	LysR family transcriptional regulator	not assigned	not assigned	not assigned	COG0583	K	Transcription	PTHR30346:SF0
T303_03360	hypothetical protein	not assigned	not assigned	not assigned	not assigned	not assigned	not assigned	NOHIT
T303_03365	competence protein CoiA	K06198	coiA	competence protein CoiA	COG4469	R	General function prediction only	NOHIT
T303_03370	oligopeptidase PepB	K08602	pepF, pepB	oligoendopeptidase F [EC:3.4.24.-]	COG1164	E	Amino acid transport and metabolism	PTHR11804:SF70
T303_03375	hypothetical protein	not assigned	not assigned	not assigned	not assigned	not assigned	not assigned	NOHIT
T303_03380	O-methyltransferase	not assigned	not assigned	not assigned	COG4122	R	General function prediction only	PTHR10509:SF14
T303_03385	protease maturation protein	K07533	prsA	foldase protein PrsA [EC:5.2.1.8]	not assigned	not assigned	not assigned	PTHR47245:SF1
T303_03390	alanyl-tRNA synthase	K01872	AARS, alaS	alanyl-tRNA synthetase [EC:6.1.1.7]	COG0013	J	Translation, ribosomal structure and biogenesis	PTHR11777:SF9
T303_03395	hypothetical protein	not assigned	not assigned	not assigned	not assigned	not assigned	not assigned	PTHR13246:SF2
T303_03405	hypothetical protein	not assigned	not assigned	not assigned	not assigned	not assigned	not assigned	PTHR24023:SF929
T303_03410	cell wall protein	not assigned	not assigned	not assigned	not assigned	not assigned	not assigned	NOHIT
T303_03415	hydrolase	not assigned	not assigned	not assigned	COG0388	R	General function prediction only	PTHR23088:SF30
T303_03420	diaminopimelate aminotransferase	K08969	mtnE, mtnV	ami notransferase [EC:2.6.1.-]	COG0436	E	Amino acid transport and metabolism	PTHR42832:SF3
T303_03425	N-acetyl-gamma-glutamyl-phosphate reductase	K00145	argC	N-acetyl-gamma-glutamyl-phosphate reductase [EC:1.2.1.38]	COG0002	E	Amino acid transport and metabolism	PTHR32338:SF8
T303_03430	N-acetylglutamate synthase	K00620	argJ	glutamate N-acetyltransferase / amino-acid N-acetyltransferase [EC:2.3.1.35 2.3.1.1]	COG1364	E	Amino acid transport and metabolism	PTHR23100
T303_03435	acetylglutamate kinase	K00930	argB	acetylglutamate kinase [EC:2.7.2.8]	COG0548	E	Amino acid transport and metabolism	PTHR23342:SF0
T303_03440	acetylornithine aminotransferase	K00821	argD	acetylornithine/N-succinyldiaminopimelate ami notransferase [EC:2.6.1.11 2.6.1.17]	COG4992	E	Amino acid transport and metabolism	PTHR11986:SF79
T303_03445	polysaccharide deacetylase	not assigned	not assigned	not assigned	not assigned	not assigned	not assigned	PTHR34216:SF3
T303_03450	homoserine dehydrogenase	K00003	hom	homoserine dehydrogenase [EC:1.1.1.3]	COG0460	E	Amino acid transport and metabolism	PTHR43331:SF1
T303_03455	homoserine kinase	K00872	thrB1	homoserine kinase [EC:2.7.1.39]	COG0083	E	Amino acid transport and metabolism	PTHR20861:SF1
T303_03460	chloramphenicol-sensitivity protein (RarD) family protein	K05786	rarD	chloramphenicol-sensitive protein RarD	COG2962	S	Function unknown	PTHR22911:SF41
T303_03465	hypothetical protein	not assigned	not assigned	not assigned	not assigned	not assigned	not assigned	NOHIT
T303_03470	hypothetical protein	not assigned	not assigned	not assigned	not assigned	not assigned	not assigned	NOHIT
T303_03485	valyl-tRNA synthetase	K01873	VARS, valS	valyl-tRNA synthetase [EC:6.1.1.9]	COG0525	J	Translation, ribosomal structure and biogenesis	PTHR11946
T303_03490	hypothetical protein	not assigned	not assigned	not assigned	not assigned	not assigned	not assigned	NOHIT
T303_03495	F0F1 ATP synthase subunit C	K02110	ATPF0C, atpE	F-type H+-transporting ATPase subunit c	COG0636	C	Energy production and conversion	PTHR10031:SF0
T303_03500	F0F1 ATP synthase subunit A	K02108	ATPF0A, atpB	F-type H+-transporting ATPase subunit a	COG0356	C	Energy production and conversion	PTHR42823:SF1
T303_03505	F0F1 ATP synthase subunit B	K02109	ATPF0B, atpF	F-type H+-transporting ATPase subunit b	COG0711	C	Energy production and conversion	PTHR33445:SF1
T303_03510	F0F1 ATP synthase subunit delta	K02113	ATPF1D, atpH	F-type H+-transporting ATPase subunit delta	COG0712	C	Energy production and conversion	PTHR11910
T303_03515	F0F1 ATP synthase subunit alpha	K02111	ATPF1A, atpA	F-type H+-transporting ATPase subunit alpha [EC:7.1.2.2]	COG0056	C	Energy production and conversion	PTHR42875:SF3
T303_03520	F0F1 ATP synthase subunit gamma	K02115	ATPF1G, atpG	F-type H+-transporting ATPase subunit gamma	COG0224	C	Energy production and conversion	PTHR11693
T303_03525	F0F1 ATP synthase subunit beta	K02112	ATPF1B, atpD	F-type H+-transporting ATPase subunit beta [EC:7.1.2.2]	COG0055	C	Energy production and conversion	PTHR15184:SF8
T303_03530	F0F1 ATP synthase subunit epsilon	K02114	ATPF1E, atpC	F-type H+-transporting ATPase subunit epsilon	COG0355	C	Energy production and conversion	PTHR13822:SF10
T303_03535	cell division protein	K03588	ftsW, spoVE	cell division protein FtsW	COG0772	D	Cell cycle control, cell division, chromosome partitioning	PTHR30474:SF10
T303_03540	elongation factor Tu	K02358	tuf, TUFM	elongation factor Tu	COG0050	J	Translation, ribosomal structure and biogenesis	PTHR43721:SF17
T303_03545	triosephosphate isomerase	K01803	TPI, tpiA	triosephosphate isomerase (TIM) [EC:5.3.1.1]	COG0149	G	Carbohydrate transport and metabolism	PTHR21139:SF2
T303_03550	thymidylate kinase	K00943	tmk, DTYMK	dTMP kinase [EC:2.7.4.9]	COG0125	F	Nucleotide transport and metabolism	PTHR10344:SF4
T303_03555	DNA polymerase III subunit delta'	K02341	holB	DNA polymerase III subunit delta' [EC:2.7.7.7]	not assigned	not assigned	not assigned	PTHR11669:SF8
T303_03560	signal peptidase II	not assigned	not assigned	not assigned	COG1774	T	Signal transduction mechanisms	PTHR43830:SF3
T303_03565	DNA replication initiation control protein YabA	not assigned	not assigned	not assigned	COG4467	L	Replication, recombination and repair	NOHIT
T303_03570	16S rRNA methyltransferase	K07056	rsmI	16S rRNA (cytidine1402-2'-O)-methyltransferase [EC:2.1.1.198]	COG0313	J	Translation, ribosomal structure and biogenesis	PTHR46111:SF1
T303_03575	ammonia permease	K03320	amt, AMT, MEP	ammonium transporter, Amt family	COG0004	P	Inorganic ion transport and metabolism	PTHR43029:SF10
T303_03580	nitrogen regulatory protein P-II	K04751	glnB	nitrogen regulatory protein P-II 1	COG0347	T,E	Signal transduction mechanisms	PTHR30115:SF19
T303_03585	peptidoglycan hydrolase	not assigned	not assigned	not assigned	COG1705	N,M	Cell motility	PTHR33308:SF8
T303_03590	haloacid dehalogenase	not assigned	not assigned	not assigned	COG0561	R,H	General function prediction only	PTHR10000:SF8
T303_03600	hypothetical protein	not assigned	not assigned	not assigned	not assigned	not assigned	not assigned	NOHIT
T303_03605	phosphate transporter	not assigned	not assigned	not assigned	not assigned	not assigned	not assigned	PTHR10010:SF26
T303_03610	N-acetylglucosamine-6-phosphate deacetylase	K01443	nagA, AMDHD2	N-acetylglucosamine-6-phosphate deacetylase [EC:3.5.1.25]	COG1820	G	Carbohydrate transport and metabolism	PTHR11113:SF1
T303_03615	hypothetical protein	not assigned	not assigned	not assigned	not assigned	not assigned	not assigned	PTHR37814:SF1
T303_03620	hypothetical protein	not assigned	not assigned	not assigned	not assigned	not assigned	not assigned	PTHR37814:SF1
T303_03630	glycyl-tRNA synthase subunit alpha	K01878	glyQ	glycyl-tRNA synthetase alpha chain [EC:6.1.1.14]	COG0752	J	Translation, ribosomal structure and biogenesis	NOHIT
T303_03635	glycyl-tRNA synthase subunit beta	K01879	glyS	glycyl-tRNA synthetase beta chain [EC:6.1.1.14]	COG0751	J	Translation, ribosomal structure and biogenesis	PTHR30075:SF2
T303_03640	hypothetical protein	not assigned	not assigned	not assigned	COG4224	S	Function unknown	PTHR37300:SF1
T303_03645	amino acid transporter	K03293	TC.AAT	amino acid transporter, AAT family	COG1113	E	Amino acid transport and metabolism	PTHR43495:SF2
T303_03650	nucleotidyltransferase	not assigned	not assigned	not assigned	not assigned	not assigned	not assigned	NOHIT
T303_03660	peptidyl-prolyl cis-trans isomerase	K03767	PPIA	peptidyl-prolyl cis-trans isomerase A (cyclophilin A) [EC:5.2.1.8]	COG0652	O	Posttranslational modification, protein turnover, chaperones	PTHR45625:SF5
T303_03665	transposase IS3	not assigned	not assigned	not assigned	COG2801	X	Mobilome - prophages, transposons	PTHR42648:SF3
T303_03670	transposase IS3	not assigned	not assigned	not assigned	COG2963	X	Mobilome - prophages, transposons	PTHR33795:SF1
T303_03675	hypothetical protein	not assigned	not assigned	not assigned	not assigned	not assigned	not assigned	NOHIT
T303_03680	membrane protein	not assigned	not assigned	not assigned	not assigned	not assigned	not assigned	PTHR19282:SF159
T303_03685	hypothetical protein	not assigned	not assigned	not assigned	not assigned	not assigned	not assigned	NOHIT
T303_03690	hypothetical protein	not assigned	not assigned	not assigned	not assigned	not assigned	not assigned	NOHIT
T303_03695	LysR family transcriptional regulator	not assigned	not assigned	not assigned	COG0583	K	Transcription	PTHR30346:SF0
T303_03700	signal peptidase II	K03101	lspA	signal peptidase II [EC:3.4.23.36]	COG0597	U,M	Intracellular trafficking, secretion, and vesicular transport	PTHR33695:SF1
T303_03705	RNA pseudouridine synthase	K06180	rluD	23S rRNA pseudouridine1911/1915/1917 synthase [EC:5.4.99.23]	COG0564	J	Translation, ribosomal structure and biogenesis	PTHR21600:SF38
T303_03710	phosphoribosyl transferase	K02825	pyrR	pyrimidine operon attenuation protein / uracil phosphoribosyltransferase [EC:2.4.2.9]	COG2065	F	Nucleotide transport and metabolism	PTHR11608:SF0
T303_03715	uracil transporter	K02824	pyrP, uraA	uracil permease	COG2233	F	Nucleotide transport and metabolism	PTHR11119:SF49
T303_03720	aspartate carbamoyltransferase catalytic subunit	K00609	pyrB, PYR2	aspartate carbamoyltransferase catalytic subunit [EC:2.1.3.2]	COG0540	F	Nucleotide transport and metabolism	PTHR11405:SF16
T303_03725	carbamoyl phosphate synthase small subunit	K01956	carA, CPA1	carbamoyl-phosphate synthase small subunit [EC:6.3.5.5]	COG0505	E,F	Amino acid transport and metabolism	PTHR11405:SF4
T303_03730	carbamoyl phosphate synthase large subunit	K01955	carB, CPA2	carbamoyl-phosphate synthase large subunit [EC:6.3.5.5]	COG0458	E,F	Amino acid transport and metabolism	PTHR11405:SF50
T303_03735	transposase IS1193	not assigned	not assigned	not assigned	COG3464	X	Mobilome - prophages, transposons	PTHR33498:SF1
T303_03740	SAM-dependent methyltransferase	not assigned	not assigned	not assigned	not assigned	not assigned	not assigned	PTHR36112:SF1
T303_03745	hypothetical protein	not assigned	not assigned	not assigned	not assigned	not assigned	not assigned	NOHIT
T303_03750	hypothetical protein	K02005	ABC.CD.TX	HlyD family secretion protein	not assigned	not assigned	not assigned	PTHR32347:SF14
T303_03755	ABC transporter substrate-binding protein	not assigned	not assigned	not assigned	not assigned	not assigned	not assigned	PTHR30469
T303_03765	hypothetical protein	not assigned	not assigned	not assigned	not assigned	not assigned	not assigned	PTHR30572:SF4
T303_03770	macrolide ABC transporter	K02004	ABC.CD.P	putative ABC transport system permease protein	not assigned	not assigned	not assigned	PTHR30572:SF4
T303_03775	membrane protein	K02004	ABC.CD.P	putative ABC transport system permease protein	not assigned	not assigned	not assigned	PTHR30572:SF4
T303_03780	50S ribosomal protein L10	K02864	RP-L10, MRPL10, rplJ	large subunit ribosomal protein L10	COG0244	J	Translation, ribosomal structure and biogenesis	PTHR11560
T303_03785	50S ribosomal protein L7/L12	K02935	RP-L7, MRPL12, rplL	large subunit ribosomal protein L7/L12	COG0222	J	Translation, ribosomal structure and biogenesis	PTHR45987:SF4
T303_03795	peptide ABC transporter ATP-binding protein	K02003	ABC.CD.A	putative ABC transport system ATP-binding protein	COG1136	M	Cell wall/membrane/envelope biogenesis	PTHR24220:SF636
T303_03800	ABC transporter permease	K02004	ABC.CD.P	putative ABC transport system permease protein	not assigned	not assigned	not assigned	PTHR43738
T303_03805	hypothetical protein	not assigned	not assigned	not assigned	not assigned	not assigned	not assigned	NOHIT
T303_03810	hypothetical protein	not assigned	not assigned	not assigned	not assigned	not assigned	not assigned	NOHIT
T303_03815	hypothetical protein	not assigned	not assigned	not assigned	not assigned	not assigned	not assigned	PTHR36287:SF2
T303_03820	cell surface protein	not assigned	not assigned	not assigned	not assigned	not assigned	not assigned	PTHR36287:SF2
T303_03825	hypothetical protein	not assigned	not assigned	not assigned	not assigned	not assigned	not assigned	NOHIT
T303_03830	multidrug ABC transporter ATP-binding protein	K18887	efrA	ATP-binding cassette, subfamily B, multidrug efflux pump	COG1132	V	Defense mechanisms	PTHR24221:SF276
T303_03835	ABC transporter	K18888	efrB	ATP-binding cassette, subfamily B, multidrug efflux pump	COG1132	V	Defense mechanisms	PTHR24221:SF425
T303_03840	S-adenosylmethionine tRNA ribosyltransferase	K07568	queA	S-adenosylmethionine:tRNA ribosyltransferase-isomerase [EC:2.4.99.17]	COG0809	J	Translation, ribosomal structure and biogenesis	PTHR30307:SF0
T303_03845	glucosamine-6-phosphate isomerase	K02564	nagB, GNPDA	glucosamine-6-phosphate deaminase [EC:3.5.99.6]	COG0363	G	Carbohydrate transport and metabolism	PTHR11280:SF5
T303_03850	sensor histidine kinase	not assigned	not assigned	not assigned	not assigned	not assigned	not assigned	PTHR24421:SF10
T303_03855	response regulator	not assigned	not assigned	not assigned	COG3279	T,K	Signal transduction mechanisms	PTHR43412:SF1
T303_03860	molybdopterin biosynthesis protein MoeB	not assigned	not assigned	not assigned	COG0476	H	Coenzyme transport and metabolism	PTHR10953:SF102
T303_03865	ABC transporter ATP-binding protein	K01990	ABC-2.A	ABC-2 type transport system ATP-binding protein	COG1131	V	Defense mechanisms	PTHR42711
T303_03870	ABC transporter permease	K01992	ABC-2.P	ABC-2 type transport system permease protein	not assigned	not assigned	not assigned	PTHR43229
T303_03875	sulfurtransferase	K07146	K07146	UPF0176 protein	COG1054	R	General function prediction only	PTHR43268:SF3
T303_03880	transcriptional regulator	K07729	K07729	putative transcriptional regulator	COG1476	K	Transcription	PTHR46558:SF3
T303_03885	hypothetical protein	not assigned	not assigned	not assigned	not assigned	not assigned	not assigned	NOHIT
T303_03890	phosphorylase	not assigned	not assigned	not assigned	not assigned	not assigned	not assigned	PTHR43691:SF9
T303_03895	membrane protein	not assigned	not assigned	not assigned	COG1814	P	Inorganic ion transport and metabolism	PTHR31851:SF31
T303_03900	16S pseudouridylate synthase	K06183	rsuA	16S rRNA pseudouridine516 synthase [EC:5.4.99.19]	COG1187	J	Translation, ribosomal structure and biogenesis	PTHR21600:SF19
T303_03905	peptidase M20	not assigned	not assigned	not assigned	COG1473	R	General function prediction only	PTHR11014:SF141
T303_03910	alanine dehydrogenase	not assigned	not assigned	not assigned	not assigned	not assigned	not assigned	PTHR42795:SF1
T303_03915	alanine dehydrogenase	K00259	ald	alanine dehydrogenase [EC:1.4.1.1]	not assigned	not assigned	not assigned	PTHR42795:SF1
T303_03920	pyridine nucleotide-disulfide oxidoreductase	not assigned	not assigned	not assigned	COG1249	C	Energy production and conversion	PTHR43256:SF5
T303_03925	hypothetical protein	K09962	K09962	uncharacterized protein	COG3575	S	Function unknown	PTHR39166:SF1
T303_03930	mevalonate kinase	K00869	E2.7.1.36, MVK, mvaK1	mevalonate kinase [EC:2.7.1.36]	COG1577	I	Lipid transport and metabolism	PTHR43290
T303_03935	diphosphomevalonate decarboxylase	K01597	MVD, mvaD	diphosphomevalonate decarboxylase [EC:4.1.1.33]	COG3407	I	Lipid transport and metabolism	PTHR10977:SF4
T303_03940	phosphomevalonate kinase	K00938	E2.7.4.2, mvaK2	phosphomevalonate kinase [EC:2.7.4.2]	COG1577	I	Lipid transport and metabolism	PTHR31814:SF4
T303_03945	isopentenyl pyrophosphate isomerase	K01823	idi, IDI	isopentenyl-diphosphate Delta-isomerase [EC:5.3.3.2]	COG1304	C,R,I	Energy production and conversion	PTHR43665:SF1
T303_03950	hypothetical protein	not assigned	not assigned	not assigned	not assigned	not assigned	not assigned	NOHIT
T303_03955	N-acetylglucosamine-1-phosphate uridyltransferase	K04042	glmU	bifunctional UDP-N-acetylglucosamine pyrophosphorylase / Glucosamine-1-phosphate N-acetyltransferase [EC:2.7.7.23 2.3.1.157]	COG1207	M	Cell wall/membrane/envelope biogenesis	PTHR43584:SF3
T303_03960	ADP-ribose pyrophosphatase	K01515	nudF	ADP-ribose pyrophosphatase [EC:3.6.1.13]	COG0494	V	Defense mechanisms	PTHR11839:SF1
T303_03965	hypothetical protein	not assigned	not assigned	not assigned	not assigned	not assigned	not assigned	NOHIT
T303_03970	5'-methylthioadenosine/S-adenosylhomocysteine nucleosidase	K01243	mtnN, mtn, pfs	adenosylhomocysteine nucleosidase [EC:3.2.2.9]	COG0775	F	Nucleotide transport and metabolism	PTHR46832:SF1
T303_03975	hypothetical protein	not assigned	not assigned	not assigned	not assigned	not assigned	not assigned	NOHIT
T303_03980	peptidase	not assigned	not assigned	not assigned	not assigned	not assigned	not assigned	NOHIT
T303_03985	hypothetical protein	not assigned	not assigned	not assigned	not assigned	not assigned	not assigned	NOHIT
T303_03990	glycosyl transferase family 1	K13677	dgs, bgsA	1,2-diacylglycerol-3-alpha-glucose alpha-1,2-glucosyltransferase [EC:2.4.1.208]	COG0438	M	Cell wall/membrane/envelope biogenesis	PTHR45947:SF3
T303_03995	1,2-diacylglycerol 3-glucosyltransferase	K19002	mgs, bgsB	1,2-diacylglycerol 3-alpha-glucosyltransferase [EC:2.4.1.337]	COG0438	M	Cell wall/membrane/envelope biogenesis	PTHR45947:SF3
T303_04005	threonyl-tRNA synthase	K01868	TARS, thrS	threonyl-tRNA synthetase [EC:6.1.1.3]	COG0441	J	Translation, ribosomal structure and biogenesis	PTHR11451:SF31
T303_04010	hydrolase	not assigned	not assigned	not assigned	not assigned	not assigned	not assigned	PTHR43139
T303_04015	hypothetical protein	not assigned	not assigned	not assigned	not assigned	not assigned	not assigned	NOHIT
T303_04020	hypothetical protein	not assigned	not assigned	not assigned	not assigned	not assigned	not assigned	NOHIT
T303_04025	hemolysin III-like protein	K11068	hlyIII	hemolysin III	COG1272	U	Intracellular trafficking, secretion, and vesicular transport	PTHR20855:SF91
T303_04035	3-hydroxy-3-methylglutaryl-CoA reductase	K00054	mvaA	hydroxymethylglutaryl-CoA reductase [EC:1.1.1.88]	COG1257	I	Lipid transport and metabolism	PTHR10572:SF26
T303_04040	hydroxymethylglutaryl-CoA synthase	K01641	E2.3.3.10	hydroxymethylglutaryl-CoA synthase [EC:2.3.3.10]	COG3425	I	Lipid transport and metabolism	PTHR43323:SF2
T303_04045	thymidylate synthase	K00560	thyA, TYMS	thymidylate synthase [EC:2.1.1.45]	COG0207	F	Nucleotide transport and metabolism	PTHR11548:SF1
T303_04050	dihydrofolate reductase	K00287	DHFR, folA	dihydrofolate reductase [EC:1.5.1.3]	COG0262	H	Coenzyme transport and metabolism	PTHR22778:SF16
T303_04055	hypothetical protein	not assigned	not assigned	not assigned	not assigned	not assigned	not assigned	NOHIT
T303_04060	ATP-dependent protease	K03544	clpX, CLPX	ATP-dependent Clp protease ATP-binding subunit ClpX	COG1219	O	Posttranslational modification, protein turnover, chaperones	PTHR11262:SF4
T303_04065	GTP-binding protein YsxC	K03978	engB	GTP-binding protein	COG0218	D	Cell cycle control, cell division, chromosome partitioning	PTHR11649:SF13
T303_04070	amino acid transporter	K16235	mmuP	S-methylmethionine transporter	COG0833	E	Amino acid transport and metabolism	PTHR43341:SF5
T303_04075	homocysteine methyltransferase	K00547	mmuM, BHMT2	homocysteine S-methyltransferase [EC:2.1.1.10]	COG2040	E	Amino acid transport and metabolism	PTHR46015
T303_04080	aldose 1-epimeras	not assigned	not assigned	not assigned	not assigned	not assigned	not assigned	NOHIT
T303_04085	hypothetical protein	not assigned	not assigned	not assigned	not assigned	not assigned	not assigned	NOHIT
T303_04090	glycerol-3-phosphate acyltransferase	K08591	plsY	glycerol-3-phosphate acyltransferase PlsY [EC:2.3.1.15]	COG0344	I	Lipid transport and metabolism	PTHR30309:SF0
T303_04095	DNA topoisomerase IV subunit B	K02622	parE	topoisomerase IV subunit B [EC:5.99.1.-]	COG0187	L	Replication, recombination and repair	PTHR45866:SF6
T303_04100	DNA topoisomerase IV subunit A	K02621	parC	topoisomerase IV subunit A [EC:5.99.1.-]	COG0188	L	Replication, recombination and repair	PTHR43493:SF7
T303_04105	branched-chain amino acid aminotransferase	K00826	E2.6.1.42, ilvE	branched-chain amino acid ami notransferase [EC:2.6.1.42]	COG0115	E,H	Amino acid transport and metabolism	PTHR42825:SF2
T303_04110	branched-chain amino acid aminotransferase	not assigned	not assigned	not assigned	not assigned	not assigned	not assigned	NOHIT
T303_04115	tRNA Tyr	K14236	tRNA-Tyr	tRNA Tyr	not assigned	not assigned	not assigned	NOHIT
T303_04120	tRNA Gln	K14223	tRNA-Gln	tRNA Gln	not assigned	not assigned	not assigned	NOHIT
T303_04125	30S ribosomal protein S1	K02945	RP-S1, rpsA	small subunit ribosomal protein S1	COG0539	J	Translation, ribosomal structure and biogenesis	PTHR10724:SF7
T303_04130	tRNA Arg	K14219	tRNA-Arg	tRNA Arg	not assigned	not assigned	not assigned	NOHIT
T303_04135	hypothetical protein	not assigned	not assigned	not assigned	not assigned	not assigned	not assigned	NOHIT
T303_04140	hypothetical protein	not assigned	not assigned	not assigned	COG0398	S	Function unknown	PTHR46826:SF2
T303_04145	peptidoglycan branched peptide synthesis protein	K12554	murN	alanine adding enzyme [EC:2.3.2.-]	COG2348	M	Cell wall/membrane/envelope biogenesis	PTHR36174:SF2
T303_04155	ribose 5-phosphate isomerase	not assigned	not assigned	not assigned	not assigned	not assigned	not assigned	NOHIT
T303_04160	NUDIX hydrolase	K03574	mutT, NUDT15, MTH2	8-oxo-dGTP diphosphatase [EC:3.6.1.55]	COG0494	V	Defense mechanisms	PTHR21340:SF4
T303_04165	ATP-dependent Clp protease ATP-binding protein	K03697	clpE	ATP-dependent Clp protease ATP-binding subunit ClpE	COG0542	O	Posttranslational modification, protein turnover, chaperones	PTHR43572:SF12
T303_04170	ornithine carbamoyltransferase	K00611	OTC, argF, argI	ornithine carbamoyltransferase [EC:2.1.3.3]	COG0078	E	Amino acid transport and metabolism	PTHR45753:SF1
T303_04175	hypothetical protein	not assigned	not assigned	not assigned	COG4703	S	Function unknown	NOHIT
T303_04180	glutamine ABC transporter permease	K02029	ABC.PA.P	polar amino acid transport system permease protein	COG0765	E	Amino acid transport and metabolism	PTHR30614:SF20
T303_04185	peptide ABC transporter ATP-binding protein	K02028	ABC.PA.A	polar amino acid transport system ATP-binding protein [EC:7.4.2.1]	COG1126	E	Amino acid transport and metabolism	PTHR43166:SF4
T303_04190	iron transporter FeoA	K04758	feoA	ferrous iron transport protein A	COG1918	P	Inorganic ion transport and metabolism	PTHR42954
T303_04195	ferrous iron transporter B	K04759	feoB	ferrous iron transport protein B	COG0370	P	Inorganic ion transport and metabolism	PTHR43185:SF1
T303_04200	membrane protein	not assigned	not assigned	not assigned	not assigned	not assigned	not assigned	NOHIT
T303_04205	dTDP-4-dehydrorhamnose 3,5-epimerase	K01790	rfbC, rmlC	dTDP-4-dehydrorhamnose 3,5-epimerase [EC:5.1.3.13]	COG1898	M	Cell wall/membrane/envelope biogenesis	PTHR21047
T303_04210	transcriptional regulator	K20374	rgg3	HTH-type transcriptional regulator, SHP3-responsive repressor	not assigned	not assigned	not assigned	PTHR37038:SF12
T303_04215	lysophospholipase	not assigned	not assigned	not assigned	not assigned	not assigned	not assigned	PTHR43329:SF4
T303_04220	hypothetical protein	not assigned	not assigned	not assigned	not assigned	not assigned	not assigned	NOHIT
T303_04225	hypothetical protein	not assigned	not assigned	not assigned	not assigned	not assigned	not assigned	NOHIT
T303_04230	tetrahydrofolate dehydrogenase	K01491	folD	methylenetetrahydrofolate dehydrogenase (NADP+) / methenyltetrahydrofolate cyclohydrolase [EC:1.5.1.5 3.5.4.9]	COG0190	H	Coenzyme transport and metabolism	PTHR10025
T303_04235	carbohydrate kinase	not assigned	not assigned	not assigned	COG0063	F	Nucleotide transport and metabolism	PTHR12592:SF0
T303_04240	penicillin-binding protein 2B	K00687	pbp2B, penA	penicillin-binding protein 2B	COG0768	M,D	Cell wall/membrane/envelope biogenesis	PTHR30627:SF2
T303_04245	recombinase RecR	K06187	recR	recombination protein RecR	COG0353	L	Replication, recombination and repair	PTHR30446:SF0
T303_04255	metalloprotease	K07042	ybeY, yqfG	probable rRNA maturation factor	COG0319	J	Translation, ribosomal structure and biogenesis	PTHR22881:SF18
T303_04260	diacylglycerol kinase	K00887	dgkA	undecaprenol kinase [EC:2.7.1.66]	COG0818	I	Lipid transport and metabolism	PTHR34299:SF1
T303_04265	GTP-binding protein	K03595	era, ERAL1	GTPase	COG1159	J	Translation, ribosomal structure and biogenesis	PTHR42698:SF2
T303_04270	formamidopyrimidine-DNA glycosylase	K10563	mutM, fpg	formamidopyrimidine-DNA glycosylase [EC:3.2.2.23 4.2.99.18]	COG0266	L	Replication, recombination and repair	PTHR22993:SF9
T303_04275	dephospho-CoA kinase	K00859	coaE	dephospho-CoA kinase [EC:2.7.1.24]	COG0237	H	Coenzyme transport and metabolism	PTHR10695:SF35
T303_04285	50S ribosomal protein L33	K02913	RP-L33, MRPL33, rpmG	large subunit ribosomal protein L33	COG0267	J	Translation, ribosomal structure and biogenesis	PTHR43168:SF6
T303_04290	preprotein translocase subunit SecG	K03075	secG	preprotein translocase subunit SecG	COG1314	U	Intracellular trafficking, secretion, and vesicular transport	PTHR34182:SF1
T303_04295	ribonuclease R	K12573	rnr, vacB	ribonuclease R [EC:3.1.-.-]	COG0557	K	Transcription	PTHR23355:SF9
T303_04300	single-stranded DNA-binding protein	K03664	smpB	SsrA-binding protein	COG0691	O	Posttranslational modification, protein turnover, chaperones	PTHR30308:SF2
T303_04305	peptidyl-prolyl cis-trans isomerase	K03768	PPIB, ppiB	peptidyl-prolyl cis-trans isomerase B (cyclophilin B) [EC:5.2.1.8]	COG0652	O	Posttranslational modification, protein turnover, chaperones	PTHR45625:SF5
T303_04310	hypothetical protein	K07570	GSP13	general stress protein 13	COG1098	R	General function prediction only	PTHR10724:SF7
T303_04315	dipeptidase	K01271	pepQ	Xaa-Pro dipeptidase [EC:3.4.13.9]	COG0006	E	Amino acid transport and metabolism	PTHR46112:SF2
T303_04320	catabolite control protein A	K02529	lacI, galR	LacI family transcriptional regulator	COG1609	K	Transcription	PTHR30146:SF99
T303_04325	MmcQ protein	not assigned	not assigned	not assigned	not assigned	not assigned	not assigned	NOHIT
T303_04335	glycerate kinase	K00865	glxK, garK	glycerate 2-kinase [EC:2.7.1.165]	COG1929	G	Carbohydrate transport and metabolism	PTHR21599
T303_04340	glycogen synthase	not assigned	not assigned	not assigned	COG5506	S	Function unknown	NOHIT
T303_04345	enolase	K01689	ENO, eno	enolase [EC:4.2.1.11]	COG0148	G	Carbohydrate transport and metabolism	PTHR11902:SF1
T303_04350	isoleucyl-tRNA synthetase	not assigned	not assigned	not assigned	not assigned	not assigned	not assigned	NOHIT
T303_04355	alkaline phosphatase	K19005	ltaS	lipoteichoic acid synthase [EC:2.7.8.20]	COG1368	M	Cell wall/membrane/envelope biogenesis	PTHR47371
T303_04360	SAM-dependent methyltransferase	K06969	rlmI	23S rRNA (cytosine1962-C5)-methyltransferase [EC:2.1.1.191]	COG1092	J	Translation, ribosomal structure and biogenesis	PTHR43042:SF3
T303_04365	3-dehydroquinate dehydratase	K03785	aroD	3-dehydroquinate dehydratase I [EC:4.2.1.10]	COG0710	E	Amino acid transport and metabolism	PTHR43699:SF1
T303_04370	shikimate 5-dehydrogenase	K00014	aroE	shikimate dehydrogenase [EC:1.1.1.25]	COG0169	E	Amino acid transport and metabolism	PTHR21089:SF1
T303_04375	3-dehydroquinate synthase	K01735	aroB	3-dehydroquinate synthase [EC:4.2.3.4]	COG0337	E	Amino acid transport and metabolism	PTHR43622:SF1
T303_04380	chorismate synthase	K01736	aroC	chorismate synthase [EC:4.2.3.5]	COG0082	E	Amino acid transport and metabolism	PTHR21085:SF1
T303_04385	prephenate dehydrogenase	K04517	tyrA2	prephenate dehydrogenase [EC:1.3.1.12]	COG0287	E	Amino acid transport and metabolism	PTHR21363
T303_04390	hypothetical protein	not assigned	not assigned	not assigned	COG3679	T	Signal transduction mechanisms	NOHIT
T303_04395	L-2-hydroxyisocaproate dehydrogenase	K00016	LDH, ldh	L-lactate dehydrogenase [EC:1.1.1.27]	COG0039	C	Energy production and conversion	PTHR43128:SF7
T303_04400	3-phosphoshikimate 1-carboxyvinyltransferase	K00800	aroA	3-phosphoshikimate 1-carboxyvinyltransferase [EC:2.5.1.19]	COG0128	E	Amino acid transport and metabolism	PTHR21090:SF5
T303_04405	shikimate kinase	K00891	E2.7.1.71, aroK, aroL	shikimate kinase [EC:2.7.1.71]	COG0703	E	Amino acid transport and metabolism	PTHR21087:SF0
T303_04410	prephenate dehydratase	K04518	pheA2	prephenate dehydratase [EC:4.2.1.51]	COG0077	E	Amino acid transport and metabolism	PTHR21022:SF0
T303_04415	LytR family transcriptional regulator	not assigned	not assigned	not assigned	COG1316	M	Cell wall/membrane/envelope biogenesis	PTHR33392:SF8
T303_04420	ethanolamine utilization protein EutJ	K11041	eta	exfoliative toxin A/B	COG1275	V	Defense mechanisms	PTHR37955:SF1
T303_04425	dehydrogenase	not assigned	not assigned	not assigned	COG1960	I	Lipid transport and metabolism	PTHR43835:SF14
T303_04430	alkylhydroperoxidase	not assigned	not assigned	not assigned	COG2128	P	Inorganic ion transport and metabolism	PTHR35446:SF2
T303_04435	RNA methyltransferase	K03215	rumA	23S rRNA (uracil1939-C5)-methyltransferase [EC:2.1.1.190]	COG2265	J	Translation, ribosomal structure and biogenesis	PTHR11061
T303_04450	hypothetical protein	not assigned	not assigned	not assigned	not assigned	not assigned	not assigned	NOHIT
T303_04455	hypothetical protein	not assigned	not assigned	not assigned	not assigned	not assigned	not assigned	NOHIT
T303_04470	transposase	K07483	K07483	transposase	COG2963	X	Mobilome - prophages, transposons	PTHR33215
T303_04480	bacteriocin immunity protein	not assigned	not assigned	not assigned	not assigned	not assigned	not assigned	NOHIT
T303_04490	hypothetical protein	not assigned	not assigned	not assigned	COG3272	S	Function unknown	PTHR30087:SF0
T303_04495	pyrimidine dimer DNA glycosylase	not assigned	not assigned	not assigned	not assigned	not assigned	not assigned	NOHIT
T303_04505	hypothetical protein	not assigned	not assigned	not assigned	not assigned	not assigned	not assigned	NOHIT
T303_04515	hypothetical protein	not assigned	not assigned	not assigned	not assigned	not assigned	not assigned	NOHIT
T303_04520	hypothetical protein	not assigned	not assigned	not assigned	not assigned	not assigned	not assigned	NOHIT
T303_04525	hypothetical protein	not assigned	not assigned	not assigned	not assigned	not assigned	not assigned	NOHIT
T303_04530	CRISPR-associated protein Csn1	K09952	csn1, cas9	CRISPR-associated endonuclease Csn1 [EC:3.1.-.-]	COG3513	V	Defense mechanisms	PTHR33877:SF2
T303_04535	CRISPR-associated protein Cas1	K15342	cas1	CRISP-associated protein Cas1	COG1518	V	Defense mechanisms	PTHR34353:SF2
T303_04540	CRISPR-associated protein Cas2	K09951	cas2	CRISPR-associated protein Cas2	COG3512	V	Defense mechanisms	NOHIT
T303_04545	hypothetical protein	not assigned	not assigned	not assigned	not assigned	not assigned	not assigned	NOHIT
T303_04550	phosphate ABC transporter substrate-binding protein	K08986	ycgQ	putative membrane protein	COG3689	S	Function unknown	PTHR40047:SF1
T303_04555	membrane protein	K07089	K07089	uncharacterized protein	COG0701	S	Function unknown	PTHR34184:SF4
T303_04560	hypothetical protein	not assigned	not assigned	not assigned	not assigned	not assigned	not assigned	NOHIT
T303_04565	S1 RNA-binding protein	K06959	tex	protein Tex	COG2183	K	Transcription	PTHR10724:SF10
T303_04570	sprT-like protein	K03095	sprL	SprT-like protein	COG3091	R	General function prediction only	PTHR38773:SF1
T303_04575	membrane protein	not assigned	not assigned	not assigned	COG1983	T,K	Signal transduction mechanisms	PTHR33885:SF3
T303_04580	HPr kinase/phosphorylase	K06023	hprK, ptsK	HPr kinase/phosphorylase [EC:2.7.11.- 2.7.4.-]	COG1493	T	Signal transduction mechanisms	PTHR30305:SF1
T303_04585	prolipoprotein diacylglyceryl transferase	K13292	lgt, umpA	phosphatidylglycerol---prolipoprotein diacylglyceryl transferase [EC:2.5.1.145]	COG0682	M	Cell wall/membrane/envelope biogenesis	PTHR30589:SF0
T303_04590	chemotaxis protein	not assigned	not assigned	not assigned	COG4768	S	Function unknown	PTHR40070:SF1
T303_04595	hypothetical protein	not assigned	not assigned	not assigned	not assigned	not assigned	not assigned	PTHR35792
T303_04600	hypothetical protein	not assigned	not assigned	not assigned	not assigned	not assigned	not assigned	NOHIT
T303_04605	peptidase family U32	not assigned	not assigned	not assigned	COG0826	O	Posttranslational modification, protein turnover, chaperones	PTHR30217:SF12
T303_04610	protease	K08303	K08303	putative protease [EC:3.4.-.-]	COG0826	O	Posttranslational modification, protein turnover, chaperones	PTHR30217:SF6
T303_04615	transposase IS1193	not assigned	not assigned	not assigned	COG3464	X	Mobilome - prophages, transposons	PTHR33498:SF1
T303_04625	hypothetical protein	not assigned	not assigned	not assigned	not assigned	not assigned	not assigned	NOHIT
T303_04630	seryl-tRNA synthetase	not assigned	not assigned	not assigned	COG4443	S	Function unknown	NOHIT
T303_04635	transposase IS1193	not assigned	not assigned	not assigned	COG3464	X	Mobilome - prophages, transposons	PTHR33498:SF1
T303_04640	manganese transporter	K03322	mntH	manganese transport protein	COG1914	P	Inorganic ion transport and metabolism	PTHR11706:SF33
T303_04645	hypothetical protein	not assigned	not assigned	not assigned	not assigned	not assigned	not assigned	NOHIT
T303_04650	DNA mismatch repair protein MutT	K03574	mutT, NUDT15, MTH2	8-oxo-dGTP diphosphatase [EC:3.6.1.55]	not assigned	not assigned	not assigned	PTHR47707:SF1
T303_04655	RNA helicase	not assigned	not assigned	not assigned	COG1061	L,K	Replication, recombination and repair	PTHR24031:SF589
T303_04660	transposase IS905	not assigned	not assigned	not assigned	COG3328	X	Mobilome - prophages, transposons	PTHR33217
T303_04665	lysyl-tRNA synthetase	K04567	KARS, lysS	lysyl-tRNA synthetase, class II [EC:6.1.1.6]	COG1190	J	Translation, ribosomal structure and biogenesis	PTHR42918:SF9
T303_04670	peptidoglycan-binding protein	not assigned	not assigned	not assigned	not assigned	not assigned	not assigned	PTHR33734
T303_04675	Valyl-tRNA synthetase	not assigned	not assigned	not assigned	not assigned	not assigned	not assigned	NOHIT
T303_04680	HAD family hydrolase	K07025	K07025	putative hydrolase of the HAD superfamily	COG1011	H	Coenzyme transport and metabolism	PTHR46470
T303_04685	hypothetical protein	not assigned	not assigned	not assigned	not assigned	not assigned	not assigned	NOHIT
T303_04690	phosphoglycerate mutase	K15634	gpmB	probable phosphoglycerate mutase [EC:5.4.2.12]	COG0406	G	Carbohydrate transport and metabolism	PTHR23029:SF83
T303_04695	prolyl-tRNA synthetase	K03976	ybaK, ebsC	Cys-tRNA(Pro)/Cys-tRNA(Cys) deacylase [EC:3.1.1.-]	COG2606	J	Translation, ribosomal structure and biogenesis	PTHR30411:SF0
T303_04700	N-acetylmuramoyl-L-alanine amidase	K07273	acm	lysozyme	COG3757	M	Cell wall/membrane/envelope biogenesis	PTHR34135:SF1
T303_04705	sodium transporter	not assigned	not assigned	not assigned	not assigned	not assigned	not assigned	NOHIT
T303_04710	membrane protein	not assigned	not assigned	not assigned	not assigned	not assigned	not assigned	NOHIT
T303_04715	hypothetical protein	not assigned	not assigned	not assigned	not assigned	not assigned	not assigned	NOHIT
T303_04720	hypothetical protein	not assigned	not assigned	not assigned	not assigned	not assigned	not assigned	NOHIT
T303_04725	lipase	not assigned	not assigned	not assigned	not assigned	not assigned	not assigned	NOHIT
T303_04735	hypothetical protein	not assigned	not assigned	not assigned	not assigned	not assigned	not assigned	NOHIT
T303_04740	type I restriction-modification system restriction subunit	K01153	hsdR	type I restriction enzyme, R subunit [EC:3.1.21.3]	COG0610	V	Defense mechanisms	PTHR30195:SF15
T303_04745	hypothetical protein	not assigned	not assigned	not assigned	not assigned	not assigned	not assigned	NOHIT
T303_04750	hypothetical protein	not assigned	not assigned	not assigned	not assigned	not assigned	not assigned	NOHIT
T303_04755	hypothetical protein	not assigned	not assigned	not assigned	not assigned	not assigned	not assigned	NOHIT
T303_04760	hypothetical protein	not assigned	not assigned	not assigned	not assigned	not assigned	not assigned	NOHIT
T303_04765	type I restriction-modification system specificty subunit	K01154	hsdS	type I restriction enzyme, S subunit [EC:3.1.21.3]	COG0732	V	Defense mechanisms	PTHR30408
T303_04770	NTPase	not assigned	not assigned	not assigned	not assigned	not assigned	not assigned	NOHIT
T303_04775	hypothetical protein	not assigned	not assigned	not assigned	not assigned	not assigned	not assigned	NOHIT
T303_04780	type I restriction-modification system methyltransferase subunit	K03427	hsdM	type I restriction enzyme M protein [EC:2.1.1.72]	COG0286	V	Defense mechanisms	PTHR42933:SF1
T303_04795	cytoplasmic membrane protein	K03744	lemA	LemA protein	COG1704	S	Function unknown	PTHR34478
T303_04800	heat shock protein HtpX	K03799	htpX	heat shock protein HtpX [EC:3.4.24.-]	COG0501	O	Posttranslational modification, protein turnover, chaperones	PTHR43221:SF1
T303_04805	membrane protein	not assigned	not assigned	not assigned	not assigned	not assigned	not assigned	NOHIT
T303_04810	hypothetical protein	not assigned	not assigned	not assigned	not assigned	not assigned	not assigned	PTHR10559
T303_04815	phosphoenolpyruvate carboxylase	K01595	ppc	phosphoenolpyruvate carboxylase [EC:4.1.1.31]	COG2352	C	Energy production and conversion	PTHR30523:SF13
T303_04820	DNA polymerase III subunit delta	K02340	holA	DNA polymerase III subunit delta [EC:2.7.7.7]	COG1466	L	Replication, recombination and repair	PTHR34388:SF1
T303_04825	superoxide dismutase	K04564	SOD2	superoxide dismutase, Fe-Mn family [EC:1.15.1.1]	COG0605	P	Inorganic ion transport and metabolism	PTHR43595:SF2
T303_04830	Peptidase family S11	not assigned	not assigned	not assigned	not assigned	not assigned	not assigned	PTHR35333:SF3
T303_04835	DNA protection during starvation protein	K04047	dps	starvation-inducible DNA-binding protein	COG0783	V,P	Defense mechanisms	PTHR42932:SF1
T303_04840	Fur family transcriptional regulator	K09825	perR	Fur family transcriptional regulator, peroxide stress response regulator	COG0735	P	Inorganic ion transport and metabolism	PTHR33202:SF8
T303_04845	hypothetical protein	not assigned	not assigned	not assigned	COG4483	S	Function unknown	NOHIT
T303_04850	glucokinase	K00845	glk	glucokinase [EC:2.7.1.2]	COG1940	G,K	Carbohydrate transport and metabolism	PTHR18964:SF160
T303_04855	GTP-binding protein	K06207	typA, bipA	GTP-binding protein	COG1217	T	Signal transduction mechanisms	PTHR42908:SF8
T303_04860	membrane protein	not assigned	not assigned	not assigned	not assigned	not assigned	not assigned	NOHIT
T303_04865	UDP-N-acetylmuramoyl-L-alanyl-D-glutamate synthetase	K01925	murD	UDP-N-acetylmuramoylalanine--D-glutamate ligase [EC:6.3.2.9]	COG0771	M	Cell wall/membrane/envelope biogenesis	PTHR43692:SF1
T303_04870	UDP diphospho-muramoylpentapeptide beta-N-acetylglucosaminyltransferase	K02563	murG	UDP-N-acetylglucosamine--N-acetylmuramyl-(pentapeptide) pyrophosphoryl-undecaprenol N-acetylglucosamine transferase [EC:2.4.1.227]	COG0707	M	Cell wall/membrane/envelope biogenesis	PTHR21015:SF27
T303_04880	cell division protein FtsA	K03590	ftsA	cell division protein FtsA	COG0849	D	Cell cycle control, cell division, chromosome partitioning	PTHR32432:SF4
T303_04885	cell division protein FtsZ	K03531	ftsZ	cell division protein FtsZ	COG0206	D	Cell cycle control, cell division, chromosome partitioning	PTHR30314:SF3
T303_04890	cell division protein	K06997	yggS, PROSC	PLP dependent protein	COG0325	R	General function prediction only	PTHR10146:SF5
T303_04895	cell division protein SepF	K09772	sepF	cell division inhibitor SepF	COG1799	D	Cell cycle control, cell division, chromosome partitioning	PTHR35798:SF1
T303_04900	membrane protein	K02221	yggT	YggT family protein	not assigned	not assigned	not assigned	PTHR33219:SF5
T303_04905	RNA binding protein	not assigned	not assigned	not assigned	COG2302	R	General function prediction only	PTHR32219:SF3
T303_04910	cell division protein DivIVA	K04074	divIVA	cell division initiation protein	COG3599	D	Cell cycle control, cell division, chromosome partitioning	PTHR35794:SF2
T303_04915	isoleucyl-tRNA synthetase	K01870	IARS, ileS	isoleucyl-tRNA synthetase [EC:6.1.1.5]	COG0060	J	Translation, ribosomal structure and biogenesis	PTHR42765
T303_04925	manganese transporter NRAMP family	not assigned	not assigned	not assigned	COG1914	P	Inorganic ion transport and metabolism	PTHR11706:SF3
T303_04930	50S ribosomal protein L31	K02909	RP-L31, rpmE	large subunit ribosomal protein L31	COG0254	J	Translation, ribosomal structure and biogenesis	PTHR33280:SF1
T303_04935	thiamine biosynthesis protein ApbE	K03734	apbE	FAD:protein FMN transferase [EC:2.7.1.180]	COG1477	H	Coenzyme transport and metabolism	PTHR30040:SF2
T303_04940	oligoribonuclease	K06881	nrnA	bifunctional oligoribonuclease and PAP phosphatase NrnA [EC:3.1.3.73.1.13.3]	COG0618	F	Nucleotide transport and metabolism	PTHR47618:SF1
T303_04945	glutathione S-transferase	K11209	yghU, yfcG	GSH-dependent disulfide-bond oxidoreductase [EC:1.8.4.-]	COG0625	O	Posttranslational modification, protein turnover, chaperones	PTHR44051:SF12
T303_04950	adenosine deaminase	K01488	add, ADA	adenosine deaminase [EC:3.5.4.4]	COG1816	F	Nucleotide transport and metabolism	PTHR11409:SF43
T303_04955	thymidine kinase	K00857	tdk, TK	thymidine kinase [EC:2.7.1.21]	COG1435	F	Nucleotide transport and metabolism	PTHR11441:SF0
T303_04960	peptide chain release factor 1	K02835	prfA, MTRF1, MRF1	peptide chain release factor 1	COG0216	J	Translation, ribosomal structure and biogenesis	PTHR43804:SF4
T303_04965	N5-glutamine S-adenosyl-L-methionine-dependent methyltransferase	K02493	hemK, prmC, HEMK	release factor glutamine methyltransferase [EC:2.1.1.297]	COG2890	J	Translation, ribosomal structure and biogenesis	PTHR18895:SF74
T303_04970	tRNA threonylcarbamoyl adenosine modification protein	K07566	tsaC, rimN, SUA5	L-threonylcarbamoyladenylate synthase [EC:2.7.7.87]	COG0009	J	Translation, ribosomal structure and biogenesis	PTHR17490:SF3
T303_04975	serine hydroxymethyltransferase	K00600	glyA, SHMT	glycine hydroxymethyltransferase [EC:2.1.2.1]	COG0112	E	Amino acid transport and metabolism	PTHR11680:SF30
T303_04980	hypothetical protein	not assigned	not assigned	not assigned	not assigned	not assigned	not assigned	NOHIT
T303_04985	hypothetical protein	not assigned	not assigned	not assigned	not assigned	not assigned	not assigned	PTHR34135:SF3
T303_04990	multidrug ABC transporter ATP-binding protein	K06148	ABCC-BAC	ATP-binding cassette, subfamily C, bacterial	COG1132	V	Defense mechanisms	PTHR24222:SF44
T303_04995	sugar ABC transporter ATP-binding protein	K06147	ABCB-BAC	ATP-binding cassette, subfamily B, bacterial	COG1132	V	Defense mechanisms	PTHR24221:SF424
T303_05000	putative component involved in D-alanylation of teichoic acids	not assigned	not assigned	not assigned	not assigned	not assigned	not assigned	NOHIT
T303_05005	D-alanine--poly(phosphoribitol) ligase	K03367	dltA	D-alanine--poly(phosphoribitol) ligase subunit 1 [EC:6.1.1.13]	not assigned	not assigned	not assigned	PTHR45398:SF1
T303_05010	D-alanyl-lipoteichoic acid biosynthesis protein DltB	K03739	dltB	membrane protein involved in D-alanine export	COG1696	M	Cell wall/membrane/envelope biogenesis	PTHR13285:SF23
T303_05015	D-alanine--poly(phosphoribitol) ligase	K14188	dltC	D-alanine--poly(phosphoribitol) ligase subunit 2 [EC:6.1.1.13]	COG0236	I,Q	Lipid transport and metabolism	PTHR20863:SF28
T303_05020	D-alanyl-lipoteichoic acid biosynthesis protein DltD	K03740	dltD	D-alanine transfer protein	COG3966	M	Cell wall/membrane/envelope biogenesis	PTHR40039:SF1
T303_05030	transposase IS861	K07497	K07497	putative transposase	not assigned	not assigned	not assigned	PTHR42648:SF3
T303_05040	Ca2+, Mn2+-P-type ATPase	not assigned	not assigned	not assigned	COG0474	P	Inorganic ion transport and metabolism	PTHR24093:SF369
T303_05045	anthranilate synthase	K03342	pabBC	para-aminobenzoate synthetase / 4-amino-4-deoxychorismate lyase [EC:2.6.1.85 4.1.3.38]	COG0147	E,H	Amino acid transport and metabolism	PTHR11236:SF18
T303_05050	hypothetical protein	not assigned	not assigned	not assigned	not assigned	not assigned	not assigned	NOHIT
T303_05055	hypothetical protein	not assigned	not assigned	not assigned	not assigned	not assigned	not assigned	NOHIT
T303_05060	hypothetical protein	not assigned	not assigned	not assigned	not assigned	not assigned	not assigned	NOHIT
T303_05065	hypothetical protein	not assigned	not assigned	not assigned	not assigned	not assigned	not assigned	NOHIT
T303_05070	hypothetical protein	not assigned	not assigned	not assigned	not assigned	not assigned	not assigned	NOHIT
T303_05075	DNA primase	K06919	K06919	putative DNA primase/helicase	not assigned	not assigned	not assigned	PTHR35372:SF2
T303_05080	hypothetical protein	not assigned	not assigned	not assigned	not assigned	not assigned	not assigned	NOHIT
T303_05085	hypothetical protein	not assigned	not assigned	not assigned	not assigned	not assigned	not assigned	NOHIT
T303_05090	hypothetical protein	not assigned	not assigned	not assigned	not assigned	not assigned	not assigned	NOHIT
T303_05095	hypothetical protein	not assigned	not assigned	not assigned	not assigned	not assigned	not assigned	NOHIT
T303_05100	hypothetical protein	not assigned	not assigned	not assigned	not assigned	not assigned	not assigned	NOHIT
T303_05105	hypothetical protein	not assigned	not assigned	not assigned	not assigned	not assigned	not assigned	NOHIT
T303_05110	XRE family transcriptional regulator	not assigned	not assigned	not assigned	COG3655	K	Transcription	PTHR46797
T303_05115	XRE family transcriptional regulator	not assigned	not assigned	not assigned	COG1476	K	Transcription	PTHR46558
T303_05120	DNA integrase	not assigned	not assigned	not assigned	COG4974	L	Replication, recombination and repair	PTHR30349:SF58
T303_05125	hypothetical protein	not assigned	not assigned	not assigned	not assigned	not assigned	not assigned	NOHIT
T303_05130	5-methyltetrahydropteroyltriglutamate--homocysteine methyltransferase	K00549	metE	5-methyltetrahydropteroyltriglutamate--homocysteine methyltransferase [EC:2.1.1.14]	COG0620	E	Amino acid transport and metabolism	PTHR30519:SF0
T303_05135	5,10-methylenetetrahydrofolate reductase	K00297	metF, MTHFR	methylenetetrahydrofolate reductase (NADPH) [EC:1.5.1.20]	COG0685	E	Amino acid transport and metabolism	PTHR45754:SF2
T303_05140	phosphoglucomutase	K01835	pgm	phosphoglucomutase [EC:5.4.2.2]	COG1109	G	Carbohydrate transport and metabolism	PTHR45745:SF1
T303_05145	membrane protein	not assigned	not assigned	not assigned	COG4684	S	Function unknown	NOHIT
T303_05150	phosphopantothenoylcysteine decarboxylase	K01598	PPCDC, coaC	phosphopantothenoylcysteine decarboxylase [EC:4.1.1.36]	not assigned	not assigned	not assigned	PTHR14359:SF6
T303_05155	phosphopantothenate--cysteine ligase	K01922	PPCS, COAB	phosphopantothenate---cysteine ligase (ATP) [EC:6.3.2.51]	not assigned	not assigned	not assigned	PTHR14359:SF22
T303_05160	formate--tetrahydrofolate ligase	K01938	fhs	formate--tetrahydrofolate ligase [EC:6.3.4.3]	COG2759	F	Nucleotide transport and metabolism	PTHR43274
T303_05175	transposase IS3	not assigned	not assigned	not assigned	COG2963	X	Mobilome - prophages, transposons	PTHR33795:SF1
T303_05180	transposase IS3	not assigned	not assigned	not assigned	COG2801	X	Mobilome - prophages, transposons	PTHR42648:SF3
T303_05185	transposase IS1193	not assigned	not assigned	not assigned	COG3464	X	Mobilome - prophages, transposons	PTHR33498:SF1
T303_05190	spermidine/putrescine ABC transporter permease	K11070	potC	spermidine/putrescine transport system permease protein	not assigned	not assigned	not assigned	PTHR43848:SF2
T303_05195	spermidine/putrescine ABC transporter substrate-binding protein	K11069	potD	spermidine/putrescine transport system substrate-binding protein	COG0687	E	Amino acid transport and metabolism	PTHR30222:SF5
T303_05200	ribonuclease HII	not assigned	not assigned	not assigned	COG0038	P	Inorganic ion transport and metabolism	PTHR45711:SF5
T303_05205	cell envelope serine proteinase	K01361	E3.4.21.96	lactocepin [EC:3.4.21.96]	COG1404	O	Posttranslational modification, protein turnover, chaperones	PTHR43806:SF11
T303_05215	transposase IS3	not assigned	not assigned	not assigned	COG2801	X	Mobilome - prophages, transposons	PTHR42648
T303_05220	transposase IS1193	not assigned	not assigned	not assigned	COG3464	X	Mobilome - prophages, transposons	PTHR33498:SF1
T303_05225	30S ribosomal protein S20	K02968	RP-S20, rpsT	small subunit ribosomal protein S20	COG0268	J	Translation, ribosomal structure and biogenesis	PTHR33398
T303_05230	pantothenate kinase	K00867	coaA	type I pantothenate kinase [EC:2.7.1.33]	COG1072	H	Coenzyme transport and metabolism	PTHR10285:SF6
T303_05235	16S rRNA methyltransferase	K00564	rsmC	16S rRNA (guanine1207-N2)-methyltransferase [EC:2.1.1.172]	not assigned	not assigned	not assigned	PTHR47816:SF2
T303_05250	cytidine deaminase	K01489	cdd, CDA	cytidine deaminase [EC:3.5.4.5]	COG0295	F	Nucleotide transport and metabolism	PTHR11644
T303_05255	membrane protein	K07335	bmpA, bmpB, tmpC	basic membrane protein A and related proteins	COG1744	M	Cell wall/membrane/envelope biogenesis	PTHR34296:SF2
T303_05260	heme ABC transporter ATP-binding protein	K02056	ABC.SS.A	simple sugar transport system ATP-binding protein [EC:3.6.3.17]	COG3845	R	General function prediction only	PTHR43790:SF4
T303_05265	branched-chain amino acid ABC transporter permease	K02057	ABC.SS.P	simple sugar transport system permease protein	COG4603	R	General function prediction only	PTHR47089:SF1
T303_05270	sugar ABC transporter permease	K02057	ABC.SS.P	simple sugar transport system permease protein	COG1079	R	General function prediction only	PTHR43370:SF1
T303_05275	hypothetical protein	not assigned	not assigned	not assigned	COG0491	R	General function prediction only	PTHR46233:SF3
T303_05280	helicase DinG	K03722	dinG	ATP-dependent DNA helicase DinG [EC:3.6.4.12]	COG1199	L	Replication, recombination and repair	PTHR11472:SF60
T303_05285	hypothetical protein	not assigned	not assigned	not assigned	COG5353	S	Function unknown	NOHIT
T303_05290	aspartate aminotransferase	not assigned	not assigned	not assigned	COG0436	E	Amino acid transport and metabolism	PTHR46383:SF1
T303_05295	asparaginyl-tRNA synthase	K01893	NARS, asnS	asparaginyl-tRNA synthetase [EC:6.1.1.22]	COG0017	J	Translation, ribosomal structure and biogenesis	PTHR22594:SF16
T303_05310	translation initiation inhibitor	not assigned	not assigned	not assigned	COG0251	V	Defense mechanisms	PTHR11803:SF13
T303_05315	7-cyano-7-deazaguanine synthase	K06920	queC	7-cyano-7-deazaguanine synthase [EC:6.3.4.20]	COG0603	J	Translation, ribosomal structure and biogenesis	PTHR42914:SF1
T303_05320	6-pyruvoyl tetrahydrobiopterin synthase	K01737	queD, ptpS, PTS	6-pyruvoyltetrahydropterin/6-carboxytetrahydropterin synthase [EC:4.2.3.12 4.1.2.50]	COG0720	H	Coenzyme transport and metabolism	PTHR12589
T303_05325	7-carboxy-7-deazaguanine synthase	K10026	queE	7-carboxy-7-deazaguanine synthase [EC:4.3.99.3]	COG0602	R	General function prediction only	PTHR42836:SF1
T303_05330	7-cyano-7-deazaguanine reductase	K09457	queF	7-cyano-7-deazaguanine reductase [EC:1.7.1.13]	COG0780	J	Translation, ribosomal structure and biogenesis	PTHR34354:SF1
T303_05335	hypothetical protein	not assigned	not assigned	not assigned	not assigned	not assigned	not assigned	NOHIT
T303_05340	serine protease	not assigned	not assigned	not assigned	not assigned	not assigned	not assigned	NOHIT
T303_05345	cyclic nucleotide-binding protein	not assigned	not assigned	not assigned	COG4420	S	Function unknown	PTHR41386:SF1
T303_05350	ATPase P	K06958	rapZ	RNase adapter protein RapZ	COG1660	T	Signal transduction mechanisms	PTHR30448:SF0
T303_05355	hypothetical protein	not assigned	not assigned	not assigned	COG0391	H,G	Coenzyme transport and metabolism	PTHR30135:SF3
T303_05360	sporulation protein	K09762	K09762	uncharacterized protein	COG1481	K	Transcription	PTHR37307:SF1
T303_05370	bacteriocin	not assigned	not assigned	not assigned	not assigned	not assigned	not assigned	NOHIT
T303_05375	cold-shock protein	K03704	cspA	cold shock protein (beta-ribbon, CspA family)	COG1278	K	Transcription	PTHR11544:SF115
T303_05380	cold-shock protein	K03704	cspA	cold shock protein (beta-ribbon, CspA family)	COG1278	K	Transcription	PTHR11544:SF115
T303_05385	transposase IS3	not assigned	not assigned	not assigned	COG2801	X	Mobilome - prophages, transposons	PTHR42648:SF3
T303_05390	transposase IS3	not assigned	not assigned	not assigned	COG2963	X	Mobilome - prophages, transposons	PTHR33795:SF1
T303_05395	transposase IS905	not assigned	not assigned	not assigned	COG3328	X	Mobilome - prophages, transposons	PTHR33217
T303_05400	hypothetical protein	not assigned	not assigned	not assigned	not assigned	not assigned	not assigned	NOHIT
T303_05405	ATPase	K01533	copB	Cu2+-exporting ATPase [EC:3.6.3.4]	COG2217	P	Inorganic ion transport and metabolism	PTHR43315:SF1
T303_05410	transposase IS905	not assigned	not assigned	not assigned	COG3328	X	Mobilome - prophages, transposons	PTHR33217
T303_05415	type I restriction-modification system restriction subunit	not assigned	not assigned	not assigned	not assigned	not assigned	not assigned	PTHR30195:SF15
T303_05420	cysteine synthase	K01738	cysK	cysteine synthase [EC:2.5.1.47]	COG0031	E	Amino acid transport and metabolism	PTHR10314:SF169
T303_05425	cystathionine beta-lyase	K01760	metC	cysteine-S-conjugate beta-lyase [EC:4.4.1.13]	COG0626	E	Amino acid transport and metabolism	PTHR11808:SF15
T303_05435	hypothetical protein	not assigned	not assigned	not assigned	not assigned	not assigned	not assigned	PTHR33217:SF5
T303_05450	DNA methyltransferase	K03427	hsdM	type I restriction enzyme M protein [EC:2.1.1.72]	not assigned	not assigned	not assigned	PTHR42933:SF1
T303_05455	sugar transporter	K05340	glcU	glucose uptake protein	COG4975	G	Carbohydrate transport and metabolism	PTHR16119:SF22
T303_05460	hypothetical protein	not assigned	not assigned	not assigned	not assigned	not assigned	not assigned	PTHR37417:SF3
T303_05465	restriction endonuclease subunit M	not assigned	not assigned	not assigned	not assigned	not assigned	not assigned	PTHR42933:SF1
T303_05470	hypothetical protein	not assigned	not assigned	not assigned	not assigned	not assigned	not assigned	PTHR36844:SF1
T303_05475	zinc ABC transporter substrate-binding protein	K09815	znuA	zinc transport system substrate-binding protein	COG0803	P	Inorganic ion transport and metabolism	PTHR42953:SF3
T303_05480	hypothetical protein	not assigned	not assigned	not assigned	not assigned	not assigned	not assigned	NOHIT
T303_05485	hypothetical protein	not assigned	not assigned	not assigned	not assigned	not assigned	not assigned	NOHIT
T303_05490	membrane protein	not assigned	not assigned	not assigned	COG2855	S	Function unknown	PTHR30106:SF1
T303_05495	peptidoglycan hydrolase	not assigned	not assigned	not assigned	COG1705	N,M	Cell motility	PTHR33308:SF8
T303_05510	LysR family transcriptional regulator	not assigned	not assigned	not assigned	COG0583	K	Transcription	PTHR30346:SF0
T303_05515	glucosamine-fructose-6-phosphate aminotransferase	K00820	glmS, GFPT	glucosamine---fructose-6-phosphate ami notransferase (isomerizing) [EC:2.6.1.16]	COG0449	M	Cell wall/membrane/envelope biogenesis	PTHR10937:SF0
T303_05520	hypothetical protein	K06193	phnA	protein PhnA	COG2824	K	Transcription	PTHR30305:SF3
T303_05525	amino acid ABC transporter permease	K02029	ABC.PA.P	polar amino acid transport system permease protein	COG0765	E	Amino acid transport and metabolism	PTHR30614:SF0
T303_05530	amino acid ABC transporter ATPase	K02028	ABC.PA.A	polar amino acid transport system ATP-binding protein [EC:7.4.2.1]	COG1126	E	Amino acid transport and metabolism	PTHR43166:SF23
T303_05555	alcohol dehydrogenase	not assigned	not assigned	not assigned	not assigned	not assigned	not assigned	PTHR42940:SF7
T303_05565	hypothetical protein	not assigned	not assigned	not assigned	not assigned	not assigned	not assigned	NOHIT
T303_05575	GMP synthase	K01951	guaA, GMPS	GMP synthase (glutamine-hydrolysing) [EC:6.3.5.2]	COG0519	F	Nucleotide transport and metabolism	PTHR11922:SF2
T303_05580	GntR family transcriptional regulator	K03710	K03710	GntR family transcriptional regulator	COG2188	K	Transcription	PTHR44846
T303_05585	DNA-binding protein	K09787	K09787	uncharacterized protein	COG2739	K	Transcription	PTHR40083:SF1
T303_05590	signal recognition particle protein Srp54	K03106	SRP54, ffh	signal recognition particle subunit SRP54 [EC:3.6.5.4]	COG0541	U	Intracellular trafficking, secretion, and vesicular transport	PTHR11564:SF7
T303_05595	membrane protein	K16788	niaX	niacin transporter	not assigned	not assigned	not assigned	NOHIT
T303_05600	DeoR family transcriptional regulator	K07105	K07105	uncharacterized protein	COG1827	H,K	Coenzyme transport and metabolism	PTHR40068:SF1
T303_05605	DNA-binding protein	not assigned	not assigned	not assigned	COG2932	X	Mobilome - prophages, transposons	PTHR40661
T303_05610	ribosome biogenesis GTPase A	K14540	rbgA	ribosome biogenesis GTPase A	COG1161	J	Translation, ribosomal structure and biogenesis	PTHR45782:SF4
T303_05615	ribonuclease HII	K03470	rnhB	ribonuclease HII [EC:3.1.26.4]	COG0164	L	Replication, recombination and repair	PTHR10954:SF18
T303_05620	transcriptional regulator	not assigned	not assigned	not assigned	COG1940	G,K	Carbohydrate transport and metabolism	PTHR18964:SF151
T303_05625	DNA polymerase sliding clamp subunit	K04096	smf	DNA processing protein	COG0758	L	Replication, recombination and repair	PTHR43022:SF1
T303_05630	DNA topoisomerase I	K03168	topA	DNA topoisomerase I [EC:5.99.1.2]	COG0550	L	Replication, recombination and repair	PTHR42785:SF1
T303_05635	membrane protein	not assigned	not assigned	not assigned	not assigned	not assigned	not assigned	NOHIT
T303_05640	multidrug ABC transporter	K20488	nisR, spaR	two-component system, OmpR family, lantibiotic biosynthesis response regulator NisR/SpaR	COG0745	K,T	Transcription	PTHR26402:SF709
T303_05645	sensor histidine kinase	K20487	nisK, spaK	two-component system, OmpR family, lantibiotic biosynthesis sensor histidine kinase NisK/SpaK [EC:2.7.13.3]	COG0642	T	Signal transduction mechanisms	PTHR45528:SF1
T303_05650	tRNA (uracil-5-)-methyltransferase	K04094	trmFO, gid	methylenetetrahydrofolate--tRNA-(uracil-5-)-methyltransferase[EC:2.1.1.74]	COG1206	J	Translation, ribosomal structure and biogenesis	PTHR11806:SF2
T303_05655	5-methyltetrahydropteroyltriglutamate--homocysteine S-methyltransferase	not assigned	not assigned	not assigned	not assigned	not assigned	not assigned	PTHR43844
T303_05660	nucleoside diphosphate kinase	K00940	ndk, NME	nucleoside-diphosphate kinase [EC:2.7.4.6]	COG0105	F	Nucleotide transport and metabolism	PTHR11349:SF91
T303_05665	sulfurtransferase	not assigned	not assigned	not assigned	COG0607	P	Inorganic ion transport and metabolism	PTHR43031:SF2
T303_05675	hypothetical protein	not assigned	not assigned	not assigned	not assigned	not assigned	not assigned	NOHIT
T303_05680	GTP-binding protein LepA	K03596	lepA	GTP-binding protein LepA	COG0481	J	Translation, ribosomal structure and biogenesis	PTHR43512
T303_05685	MutR family transcriptional regulator	not assigned	not assigned	not assigned	not assigned	not assigned	not assigned	PTHR37038:SF12
T303_05695	transposase IS905	not assigned	not assigned	not assigned	COG3328	X	Mobilome - prophages, transposons	PTHR33217
T303_05700	hypothetical protein	not assigned	not assigned	not assigned	not assigned	not assigned	not assigned	NOHIT
T303_05705	radical SAM protein	not assigned	not assigned	not assigned	COG0535	R	General function prediction only	PTHR11228
T303_05715	permease of the major facilitator superfamily MFS	not assigned	not assigned	not assigned	not assigned	not assigned	not assigned	PTHR23513:SF11
T303_05720	acetolactate synthase	K01652	E2.2.1.6L, ilvB, ilvG, ilvI	acetolactate synthase I/II/III large subunit[EC:2.2.1.6]	COG0028	E,H	Amino acid transport and metabolism	PTHR18968:SF129
T303_05725	alpha-acetolactate decarboxylase	K01575	alsD, budA, aldC	acetolactate decarboxylase [EC:4.1.1.5]	COG3527	Q	Secondary metabolites biosynthesis, transport and catabolism	PTHR35524:SF1
T303_05735	ABC transporter permease	not assigned	not assigned	not assigned	not assigned	not assigned	not assigned	PTHR30287:SF1
T303_05740	short-chain dehydrogenase	not assigned	not assigned	not assigned	not assigned	not assigned	not assigned	PTHR43157:SF2
T303_05745	hypothetical protein	not assigned	not assigned	not assigned	not assigned	not assigned	not assigned	NOHIT
T303_05750	TetR family transcriptional regulator	not assigned	not assigned	not assigned	COG1309	K	Transcription	PTHR43479
T303_05755	cation transporter	K16264	czcD, zitB	cobalt-zinc-cadmium efflux system protein	COG1230	P	Inorganic ion transport and metabolism	PTHR11562:SF17
T303_05760	ferrochelatase	K01772	hemH, FECH	protoporphyrin/coproporphyrin ferrochelatase [EC:4.99.1.1 4.99.1.9]	COG0276	H	Coenzyme transport and metabolism	PTHR11108:SF1
T303_05765	molecular chaperone GroES	not assigned	not assigned	not assigned	COG1063	E,R	Amino acid transport and metabolism	PTHR42813:SF2
T303_05770	hypothetical protein	not assigned	not assigned	not assigned	not assigned	not assigned	not assigned	PTHR47751:SF1
T303_05775	hypothetical protein	not assigned	not assigned	not assigned	not assigned	not assigned	not assigned	NOHIT
T303_05780	alpha/beta hydrolase	not assigned	not assigned	not assigned	not assigned	not assigned	not assigned	NOHIT
T303_05785	hypothetical protein	not assigned	not assigned	not assigned	not assigned	not assigned	not assigned	NOHIT
T303_05795	hypothetical protein	not assigned	not assigned	not assigned	not assigned	not assigned	not assigned	NOHIT
T303_05800	phosphorylase	not assigned	not assigned	not assigned	COG2820	F	Nucleotide transport and metabolism	PTHR43691
T303_05805	5'-nucleotidase	K01091	gph	phosphoglycolate phosphatase [EC:3.1.3.18]	COG0546	C	Energy production and conversion	PTHR43434:SF6
T303_05810	ferrichrome ABC transporter substrate-binding protein	not assigned	not assigned	not assigned	not assigned	not assigned	not assigned	PTHR30532
T303_05815	hypothetical protein	not assigned	not assigned	not assigned	not assigned	not assigned	not assigned	NOHIT
T303_05825	dihydroorotate dehydrogenase	not assigned	not assigned	not assigned	COG1293	J	Translation, ribosomal structure and biogenesis	PTHR15239:SF6
T303_05830	membrane protein LaaN	not assigned	not assigned	not assigned	not assigned	not assigned	not assigned	NOHIT
T303_05835	4-methyl-5(B-hydroxyethyl)-thiazole monophosphate biosynthesis protein	K03152	thiJ	protein deglycase [EC:3.5.1.124]	COG0693	R	General function prediction only	PTHR43444:SF10
T303_05840	dihydroorotate dehydrogenase	K02823	pyrDII	dihydroorotate dehydrogenase electron transfer subunit	COG0543	C,H	Energy production and conversion	PTHR43513:SF1
T303_05845	dihydroorotate dehydrogenase	K17828	pyrDI	dihydroorotate dehydrogenase (NAD+) catalytic subunit [EC:1.3.1.14]	COG0167	F	Nucleotide transport and metabolism	PTHR43843
T303_05850	CRISPR-associated protein Cas1	K15342	cas1	CRISP-associated protein Cas1	COG1518	V	Defense mechanisms	PTHR34353:SF2
T303_05855	CRISPR-associated protein Cas2	K09951	cas2	CRISPR-associated protein Cas2	COG1343	V	Defense mechanisms	PTHR34405:SF3
T303_05860	CRISPR-associated protein Cas6	not assigned	not assigned	not assigned	COG5551	V	Defense mechanisms	NOHIT
T303_05865	CRISPR-associated protein Csm1	K07016	csm1, cas10	CRISPR-associated protein Csm1	COG1353	V	Defense mechanisms	PTHR36528:SF1
T303_05870	CRISPR-associated protein Csm2	K19138	csm2	CRISPR-associated protein Csm2	COG1421	V	Defense mechanisms	NOHIT
T303_05875	CRISPR-associated protein Cmr4	K09002	csm3	CRISPR-associated protein Csm3	COG1337	V	Defense mechanisms	PTHR35579
T303_05880	CRISPR-associated protein Csm4	K19139	csm4	CRISPR-associated protein Csm4	COG1567	V	Defense mechanisms	NOHIT
T303_05885	CRISPR-associated protein Csm5	K19140	csm5	CRISPR-associated protein Csm5	COG1332	V	Defense mechanisms	PTHR38007:SF1
T303_05895	orotidine 5'-phosphate decarboxylase	K01591	pyrF	orotidine-5'-phosphate decarboxylase [EC:4.1.1.23]	COG0284	F	Nucleotide transport and metabolism	PTHR32119:SF2
T303_05900	orotate phosphoribosyltransferase	K00762	pyrE	orotate phosphoribosyltransferase [EC:2.4.2.10]	COG0461	F	Nucleotide transport and metabolism	PTHR19278:SF9
T303_05905	hypothetical protein	not assigned	not assigned	not assigned	not assigned	not assigned	not assigned	NOHIT
T303_05910	hypothetical protein	not assigned	not assigned	not assigned	not assigned	not assigned	not assigned	NOHIT
T303_05915	peptide ABC transporter permease	K03305	TC.POT	proton-dependent oligopeptide transporter, POT family	COG3104	E	Amino acid transport and metabolism	PTHR11654:SF119
T303_05925	hypothetical protein	not assigned	not assigned	not assigned	not assigned	not assigned	not assigned	NOHIT
T303_05930	hypothetical protein	not assigned	not assigned	not assigned	not assigned	not assigned	not assigned	NOHIT
T303_05935	5'-nucleotidase	not assigned	not assigned	not assigned	COG0737	F,V	Nucleotide transport and metabolism	PTHR11575
T303_05940	hypothetical protein	not assigned	not assigned	not assigned	not assigned	not assigned	not assigned	NOHIT
T303_05945	AraC family transcriptional regulator	not assigned	not assigned	not assigned	COG2207	K	Transcription	PTHR43280:SF2
T303_05950	AraC family transcriptional regulator	not assigned	not assigned	not assigned	not assigned	not assigned	not assigned	NOHIT
T303_05955	tRNA modification GTPase	K03650	mnmE, trmE, MSS1	tRNA modification GTPase [EC:3.6.-.-]	COG0486	J	Translation, ribosomal structure and biogenesis	PTHR42714:SF2
T303_05960	sodium:alanine symporter	K03310	TC.AGCS	alanine or glycine:cation symporter, AGCS family	COG1115	E	Amino acid transport and metabolism	PTHR30330:SF3
T303_05965	ATP-dependent DNA helicase PcrA	K03657	uvrD, pcrA	DNA helicase II / ATP-dependent DNA helicase PcrA [EC:3.6.4.12]	COG0210	L	Replication, recombination and repair	PTHR11070:SF7
T303_05970	O-acetylhomoserine (thiol)-lyase	K01740	metY	O-acetylhomoserine (thiol)-lyase [EC:2.5.1.49]	COG2873	E	Amino acid transport and metabolism	PTHR43797
T303_05975	haloacid dehalogenase	not assigned	not assigned	not assigned	not assigned	not assigned	not assigned	PTHR10000
T303_05980	hypothetical protein	not assigned	not assigned	not assigned	not assigned	not assigned	not assigned	NOHIT
T303_05985	lipid hydroperoxide peroxidase	K11065	tpx	thiol peroxidase, atypical 2-Cys peroxiredoxin [EC:1.11.1.15]	COG2077	O	Posttranslational modification, protein turnover, chaperones	PTHR43110:SF1
T303_05990	type I restriction endonuclease subunit S	not assigned	not assigned	not assigned	not assigned	not assigned	not assigned	PTHR43140:SF1
T303_06000	tRNA pseudouridine synthase B	K03177	truB, PUS4, TRUB1	tRNA pseudouridine55 synthase [EC:5.4.99.25]	COG0130	J	Translation, ribosomal structure and biogenesis	PTHR13767:SF2
T303_06005	riboflavin biosynthesis protein RibF	K11753	ribF	riboflavin kinase / FMN adenylyltransferase [EC:2.7.1.26 2.7.7.2]	COG0196	H	Coenzyme transport and metabolism	PTHR22749:SF6
T303_06010	ArsR family transcriptional regulator	K16509	spxA	regulatory protein spx	COG1393	P	Inorganic ion transport and metabolism	PTHR30041:SF4
T303_06015	hypothetical protein	not assigned	not assigned	not assigned	COG4476	S	Function unknown	NOHIT
T303_06020	inositol monophosphatase	K01092	E3.1.3.25, IMPA, suhB	myo-inositol-1(or 4)-monophosphatase [EC:3.1.3.25]	COG0483	G	Carbohydrate transport and metabolism	PTHR20854:SF4
T303_06025	23S rRNA methyltransferase	not assigned	not assigned	not assigned	COG0144	J	Translation, ribosomal structure and biogenesis	PTHR22807:SF30
T303_06030	phosphate-binding protein	K02040	pstS	phosphate transport system substrate-binding protein	COG0226	P	Inorganic ion transport and metabolism	PTHR30570:SF4
T303_06035	phosphate ABC transporter permease	K02037	pstC	phosphate transport system permease protein	COG0573	P	Inorganic ion transport and metabolism	PTHR30425:SF2
T303_06040	phosphate ABC transporter permease	K02038	pstA	phosphate transport system permease protein	COG0581	P	Inorganic ion transport and metabolism	PTHR43470:SF4
T303_06045	phosphate ABC transporter ATP-binding protein	K02036	pstB	phosphate transport system ATP-binding protein [EC:7.3.2.1]	COG1117	P	Inorganic ion transport and metabolism	PTHR43423:SF4
T303_06050	phosphate ABC transporter ATP-binding protein	K02036	pstB	phosphate transport system ATP-binding protein [EC:7.3.2.1]	COG1117	P	Inorganic ion transport and metabolism	PTHR43423:SF4
T303_06055	PhoU family transcriptional regulator	K02039	phoU	phosphate transport system protein	COG0704	P	Inorganic ion transport and metabolism	PTHR42930:SF3
T303_06060	aminopeptidase N	K01256	pepN	aminopeptidase N [EC:3.4.11.2]	COG0308	E	Amino acid transport and metabolism	PTHR11533:SF174
T303_06065	tyrosine recombinase XerS	not assigned	not assigned	not assigned	COG4974	L	Replication, recombination and repair	PTHR30349:SF59
T303_06070	lipoate-protein ligase A	K03800	lplA, lplJ	lipoate---protein ligase [EC:6.3.1.20]	COG0095	H	Coenzyme transport and metabolism	PTHR12561:SF3
T303_06080	maltodextrin phosphorylase	K00688	PYG, glgP	glycogen phosphorylase [EC:2.4.1.1]	COG0058	G	Carbohydrate transport and metabolism	PTHR11468:SF3
T303_06085	4-alpha-glucanotransferase	K00705	malQ	4-alpha-gluca notransferase [EC:2.4.1.25]	COG1640	G	Carbohydrate transport and metabolism	PTHR32438:SF5
T303_06090	LacI family transcription regulator	K02529	lacI, galR	LacI family transcriptional regulator	not assigned	not assigned	not assigned	PTHR30146:SF103
T303_06095	hypothetical protein	not assigned	not assigned	not assigned	not assigned	not assigned	not assigned	NOHIT
T303_06100	preprotein translocase subunit TatA	K03116	tatA	sec-independent protein translocase protein TatA	not assigned	not assigned	not assigned	PTHR33162:SF9
T303_06105	preprotein translocase subunit TatC	K03118	tatC	sec-independent protein translocase protein TatC	COG0805	U	Intracellular trafficking, secretion, and vesicular transport	PTHR30371:SF4
T303_06110	OFeT family oxidase-dependent iron (Fe2+) transporter	K07243	FTR, FTH1, efeU	high-affinity iron transporter	COG0672	P	Inorganic ion transport and metabolism	PTHR31632:SF4
T303_06115	peroxidase	K16301	efeB	deferrochelatase/peroxidase EfeB [EC:1.11.1.-]	COG2837	P	Inorganic ion transport and metabolism	PTHR30521:SF4
T303_06120	iron ABC transporter substrate-binding protein	K07224	efeO	iron uptake system component EfeO	COG2822	P	Inorganic ion transport and metabolism	PTHR39192:SF1
T303_06125	ferrichrome ABC transporter substrate-binding protein	K02016	ABC.FEV.S	iron complex transport system substrate-binding protein	COG4607	P	Inorganic ion transport and metabolism	PTHR30532:SF4
T303_06130	iron ABC transporter ATP-binding protein	K02013	ABC.FEV.A	iron complex transport system ATP-binding protein [EC:3.6.3.34]	COG4604	P	Inorganic ion transport and metabolism	PTHR42771:SF3
T303_06135	ferrichrome ABC transporter permease	K02015	ABC.FEV.P	iron complex transport system permease protein	COG4605	P	Inorganic ion transport and metabolism	PTHR30472:SF19
T303_06140	ferrichrome ABC transporter permease	K02015	ABC.FEV.P	iron complex transport system permease protein	COG4606	P	Inorganic ion transport and metabolism	PTHR30472:SF27
T303_06145	alkaline amylopullulanase	not assigned	not assigned	not assigned	not assigned	not assigned	not assigned	NOHIT
T303_06150	alkaline amylopullulanase	not assigned	not assigned	not assigned	not assigned	not assigned	not assigned	PTHR43002:SF3
T303_06155	hypothetical protein	not assigned	not assigned	not assigned	not assigned	not assigned	not assigned	PTHR43002:SF3
T303_06160	hypothetical protein	not assigned	not assigned	not assigned	not assigned	not assigned	not assigned	PTHR43002:SF3
T303_06170	hypothetical protein	not assigned	not assigned	not assigned	not assigned	not assigned	not assigned	PTHR34135:SF2
T303_06175	hypothetical protein	not assigned	not assigned	not assigned	not assigned	not assigned	not assigned	NOHIT
T303_06180	dihydrolipoyl dehydrogenase	K00382	DLD, lpd, pdhD	dihydrolipoamide dehydrogenase [EC:1.8.1.4]	COG1249	C	Energy production and conversion	PTHR22912:SF195
T303_06185	branched-chain alpha-keto acid dehydrogenase subunit E2	K00627	DLAT, aceF, pdhC	pyruvate dehydrogenase E2 component (dihydrolipoamide acetyltransferase) [EC:2.3.1.12]	COG0508	C	Energy production and conversion	PTHR23151:SF84
T303_06190	TPP-dependent acetoin dehydrogenase complex, E1 protein subunit beta	K00162	PDHB, pdhB	pyruvate dehydrogenase E1 component beta subunit [EC:1.2.4.1]	COG0022	C	Energy production and conversion	PTHR43257:SF4
T303_06195	pyruvate dehydrogenase E1 subunit alpha	K00161	PDHA, pdhA	pyruvate dehydrogenase E1 component alpha subunit [EC:1.2.4.1]	COG1071	C	Energy production and conversion	PTHR11516
T303_06200	hypothetical protein	not assigned	not assigned	not assigned	not assigned	not assigned	not assigned	NOHIT
T303_06205	hypothetical protein	not assigned	not assigned	not assigned	not assigned	not assigned	not assigned	NOHIT
T303_06215	3'-5' exonuclease	K09951	cas2	CRISPR-associated protein Cas2	not assigned	not assigned	not assigned	PTHR30231
T303_06220	CRISPR-associated protein Cse1	K15342	cas1	CRISP-associated protein Cas1	COG1518	V	Defense mechanisms	PTHR34353:SF3
T303_06225	CRISPR-associated protein CasE	K19126	casE, cse3	CRISPR system Cascade subunit CasE	not assigned	not assigned	not assigned	NOHIT
T303_06230	CRISPR-associated protein Cas5	K19125	casD, cse5	CRISPR system Cascade subunit CasD	not assigned	not assigned	not assigned	NOHIT
T303_06235	CRISPR-associated protein CasC	K19124	casC, cse4	CRISPR system Cascade subunit CasC	not assigned	not assigned	not assigned	NOHIT
T303_06240	CRISPR-associated protein CasB	K19046	casB, cse2	CRISPR system Cascade subunit CasB	not assigned	not assigned	not assigned	NOHIT
T303_06250	helicase	K07012	cas3	CRISPR-associated endonuclease/helicase Cas3 [EC:3.1.-.- 3.6.4.-]	not assigned	not assigned	not assigned	PTHR24031:SF574
T303_06255	hypothetical protein	not assigned	not assigned	not assigned	not assigned	not assigned	not assigned	NOHIT
T303_06260	hypothetical protein	not assigned	not assigned	not assigned	COG4907	S	Function unknown	NOHIT
T303_06265	dihydroorotase	K01465	URA4, pyrC	dihydroorotase [EC:3.5.2.3]	COG0044	F	Nucleotide transport and metabolism	PTHR43668:SF1
T303_06270	uracil-DNA glycosylase	K03648	UNG, UDG	uracil-DNA glycosylase [EC:3.2.2.27]	COG0692	L	Replication, recombination and repair	PTHR11264
T303_06275	cation transporter	not assigned	not assigned	not assigned	COG0053	P	Inorganic ion transport and metabolism	PTHR43840:SF9
T303_06285	serine protease	not assigned	not assigned	not assigned	COG4667	I	Lipid transport and metabolism	PTHR14226:SF25
T303_06290	lysophospholipase	not assigned	not assigned	not assigned	not assigned	not assigned	not assigned	PTHR11852:SF0
T303_06295	lipase	not assigned	not assigned	not assigned	not assigned	not assigned	not assigned	NOHIT
T303_06300	protein kinase	K03688	ubiB, aarF	ubiquinone biosynthesis protein	COG0661	H,T	Coenzyme transport and metabolism	PTHR10566:SF113
T303_06305	hypothetical protein	not assigned	not assigned	not assigned	COG3937	T,Q	Signal transduction mechanisms	PTHR38664:SF1
T303_06315	epsP	not assigned	not assigned	not assigned	COG0628	R	General function prediction only	PTHR21716:SF41
T303_06320	epsO	K15634	gpmB	probable phosphoglycerate mutase [EC:5.4.2.12]	COG0406	G	Carbohydrate transport and metabolism	PTHR23029
T303_06325	unknown	not assigned	not assigned	not assigned	not assigned	not assigned	not assigned	NOHIT
T303_06326	unknown	not assigned	not assigned	not assigned	not assigned	not assigned	not assigned	NOHIT
T303_06327	unknown	not assigned	not assigned	not assigned	not assigned	not assigned	not assigned	NOHIT
T303_06330	orf14.9	not assigned	not assigned	not assigned	not assigned	not assigned	not assigned	PTHR36834
T303_06336	UDP-galactopyranose mutase	K01854	glf	UDP-galactopyranose mutase [EC:5.4.99.9]	COG0562	M	Cell wall/membrane/envelope biogenesis	NOHIT
T303_06345	unknown	not assigned	not assigned	not assigned	not assigned	not assigned	not assigned	NOHIT
T303_06350	epsL	not assigned	not assigned	not assigned	COG2244	M	Cell wall/membrane/envelope biogenesis	PTHR43424:SF1
T303_06355	epsK	not assigned	not assigned	not assigned	COG0463	M	Cell wall/membrane/envelope biogenesis	PTHR22916:SF51
T303_06360	eps2D	not assigned	not assigned	not assigned	not assigned	not assigned	not assigned	PTHR32309
T303_06365	eps2C	not assigned	not assigned	not assigned	not assigned	not assigned	not assigned	NOHIT
T303_06370	epsJ	not assigned	not assigned	not assigned	COG0463	M	Cell wall/membrane/envelope biogenesis	PTHR22916:SF47
T303_06375	epsI	not assigned	not assigned	not assigned	not assigned	not assigned	not assigned	NOHIT
T303_06380	epsH	not assigned	not assigned	not assigned	not assigned	not assigned	not assigned	NOHIT
T303_06385	epsG	not assigned	not assigned	not assigned	not assigned	not assigned	not assigned	NOHIT
T303_06395	epsF	not assigned	not assigned	not assigned	not assigned	not assigned	not assigned	NOHIT
T303_06400	epsE	not assigned	not assigned	not assigned	COG2148	M	Cell wall/membrane/envelope biogenesis	PTHR30576:SF10
T303_06405	not assigned	not assigned	not assigned	not assigned	COG0489	D	Cell cycle control, cell division, chromosome partitioning	NOHIT
T303_06410	eps1C	not assigned	not assigned	not assigned	COG3944	M	Cell wall/membrane/envelope biogenesis	PTHR32309
T303_06415	epsB	K01104	E3.1.3.48	protein-tyrosine phosphatase [EC:3.1.3.48]	COG4464	T	Signal transduction mechanisms	PTHR39181:SF1
T303_06420	epsA	not assigned	not assigned	not assigned	COG1316	M	Cell wall/membrane/envelope biogenesis	PTHR33392
T303_06430	purine nucleoside phosphorylase	K03784	deoD	purine-nucleoside phosphorylase [EC:2.4.2.1]	COG0813	F	Nucleotide transport and metabolism	PTHR43691:SF2
T303_06445	purine nucleoside phosphorylase	K03783	punA, PNP	purine-nucleoside phosphorylase [EC:2.4.2.1]	COG0005	F	Nucleotide transport and metabolism	PTHR11904:SF9
T303_06455	phosphopentomutase	K01839	deoB	phosphopentomutase [EC:5.4.2.7]	COG1015	G	Carbohydrate transport and metabolism	PTHR21110:SF0
T303_06460	ribose 5-phosphate isomerase	K01807	rpiA	ribose 5-phosphate isomerase A [EC:5.3.1.6]	COG0120	G	Carbohydrate transport and metabolism	PTHR43748:SF3
T303_06465	hypothetical protein	not assigned	not assigned	not assigned	not assigned	not assigned	not assigned	NOHIT
T303_06470	hypothetical protein	not assigned	not assigned	not assigned	not assigned	not assigned	not assigned	NOHIT
T303_06480	uracil-DNA glycosylase	not assigned	not assigned	not assigned	COG1573	L	Replication, recombination and repair	PTHR42160:SF1
T303_06485	dipeptidase PepV	not assigned	not assigned	not assigned	COG0624	E	Amino acid transport and metabolism	PTHR43808:SF3
T303_06490	4-oxalocrotonate tautomerase	K01821	praC, xylH	4-oxalocrotonate tautomerase [EC:5.3.2.6]	COG1942	Q	Secondary metabolites biosynthesis, transport and catabolism	PTHR35530:SF1
T303_06495	GNAT family acetyltransferase	not assigned	not assigned	not assigned	not assigned	not assigned	not assigned	PTHR42919
T303_06505	50S ribosomal protein L20	K02887	RP-L20, MRPL20, rplT	large subunit ribosomal protein L20	COG0292	J	Translation, ribosomal structure and biogenesis	PTHR10986:SF12
T303_06510	50S ribosomal protein L35	K02916	RP-L35, MRPL35, rpmI	large subunit ribosomal protein L35	COG0291	J	Translation, ribosomal structure and biogenesis	PTHR33343:SF1
T303_06515	translation initiation factor IF-3	K02520	infC, MTIF3	translation initiation factor IF-3	COG0290	J	Translation, ribosomal structure and biogenesis	PTHR10938
T303_06520	cytidylate kinase	K00945	cmk	CMP/dCMP kinase [EC:2.7.4.25]	COG0283	F	Nucleotide transport and metabolism	PTHR21299:SF2
T303_06525	peptidoglycan-binding protein LysM	not assigned	not assigned	not assigned	not assigned	not assigned	not assigned	PTHR13468:SF1
T303_06530	ferredoxin	K05337	fer	ferredoxin	COG1141	C	Energy production and conversion	PTHR39163:SF1
T303_06535	pore forming protein	not assigned	not assigned	not assigned	not assigned	not assigned	not assigned	NOHIT
T303_06540	peptidase T	K01258	pepT	tripeptide aminopeptidase [EC:3.4.11.4]	COG2195	E	Amino acid transport and metabolism	PTHR42994:SF1
T303_06545	hypothetical protein	not assigned	not assigned	not assigned	not assigned	not assigned	not assigned	NOHIT
T303_06550	signal peptidase	K03100	lepB	signal peptidase I [EC:3.4.21.89]	not assigned	not assigned	not assigned	PTHR43390
T303_06555	hypothetical protein	not assigned	not assigned	not assigned	COG3063	N,W	Cell motility	PTHR45586:SF3
T303_06560	membrane protein	not assigned	not assigned	not assigned	COG0628	R	General function prediction only	PTHR21716:SF39
T303_06565	DNA mismatch repair protein MutT	K03574	mutT, NUDT15, MTH2	8-oxo-dGTP diphosphatase [EC:3.6.1.55]	COG1051	F	Nucleotide transport and metabolism	PTHR42904:SF3
T303_06570	cell division protein FtsX	K09811	ftsX	cell division transport system permease protein	COG2177	D	Cell cycle control, cell division, chromosome partitioning	PTHR47755:SF1
T303_06575	cell division protein FtsE	K09812	ftsE	cell division transport system ATP-binding protein	COG2884	D	Cell cycle control, cell division, chromosome partitioning	PTHR24220:SF470
T303_06580	peptide chain release factor 2	K02836	prfB	peptide chain release factor 2	COG1186	J	Translation, ribosomal structure and biogenesis	PTHR43116:SF3
T303_06585	iron-sulfur cluster-binding protein	K18979	queG	epoxyqueuosine reductase [EC:1.17.99.6]	COG1600	J	Translation, ribosomal structure and biogenesis	PTHR30002:SF4
T303_06590	phosphoesterase	not assigned	not assigned	not assigned	not assigned	not assigned	not assigned	PTHR31302:SF0
T303_06595	NADPH-flavin oxidoreductase	not assigned	not assigned	not assigned	COG0778	C	Energy production and conversion	PTHR43425
T303_06600	ATPase	K01537	E3.6.3.8	Ca2+-transporting ATPase [EC:3.6.3.8]	COG0474	P	Inorganic ion transport and metabolism	PTHR42861:SF49
T303_06605	50S ribosomal protein L19	not assigned	not assigned	not assigned	not assigned	not assigned	not assigned	NOHIT
T303_06610	acetyltransferase	not assigned	not assigned	not assigned	not assigned	not assigned	not assigned	PTHR43420:SF16
T303_06615	hypothetical protein	not assigned	not assigned	not assigned	not assigned	not assigned	not assigned	NOHIT
T303_06620	sugar phosphate phosphatase	not assigned	not assigned	not assigned	COG0561	R,H	General function prediction only	PTHR10000:SF49
T303_06625	UDP-N-acetylmuramoylpentapeptide-lysine N(6)-alanyltransferase	K05363	murM	serine/alanine adding enzyme [EC:2.3.2.10]	COG2348	M	Cell wall/membrane/envelope biogenesis	PTHR36174:SF1
T303_06635	metallo-hydrolase	not assigned	not assigned	not assigned	COG1235	P	Inorganic ion transport and metabolism	PTHR47619:SF1
T303_06640	sensor kinase	K07652	vicK	two-component system, OmpR family, sensor histidine kinase VicK [EC:2.7.13.3]	COG5002	T	Signal transduction mechanisms	PTHR45453:SF1
T303_06645	PhoP family transcriptional regulator	K07668	vicR	two-component system, OmpR family, response regulator VicR	COG0745	T,K	Signal transduction mechanisms	PTHR26402:SF726
T303_06650	arginine ABC transporter ATP-binding protein	K10041	ABC.GLN1.A	putative glutamine transport system ATP-binding protein [EC:3.6.3.-]	COG1126	E	Amino acid transport and metabolism	PTHR43166:SF4
T303_06655	glutamine ABC transporter substrate-binding protein	K10039	ABC.GLN1.S	putative glutamine transport system substrate-binding protein	COG0834	E,T	Amino acid transport and metabolism	PTHR35936:SF9
T303_06660	glutamine ABC transporter permease	K10040	ABC.GLN1.P	putative glutamine transport system permease protein	COG0765	E	Amino acid transport and metabolism	PTHR30614:SF40
T303_06665	glutamine ABC transporter permease	K10040	ABC.GLN1.P	putative glutamine transport system permease protein	COG0765	E	Amino acid transport and metabolism	PTHR30614:SF39
T303_06670	DNA-entry nuclease	K15051	endA	DNA-entry nuclease	not assigned	not assigned	not assigned	NOHIT
T303_06675	DNA-directed RNA polymerase subunit beta	not assigned	not assigned	not assigned	not assigned	not assigned	not assigned	NOHIT
T303_06680	UDP-N-acetylglucosamine 1-carboxyvinyltransferase	K00790	murA	UDP-N-acetylglucosamine 1-carboxyvinyltransferase [EC:2.5.1.7]	COG0766	M	Cell wall/membrane/envelope biogenesis	PTHR43783
T303_06685	membrane protein	not assigned	not assigned	not assigned	COG4836	S	Function unknown	NOHIT
T303_06690	UDP-galactose-4-epimerase	K01784	galE, GALE	UDP-glucose 4-epimerase [EC:5.1.3.2]	COG1087	M	Cell wall/membrane/envelope biogenesis	PTHR43725:SF14
T303_06695	hypothetical protein	not assigned	not assigned	not assigned	not assigned	not assigned	not assigned	NOHIT
T303_06700	S-adenosylmethionine synthetase	K00789	metK	S-adenosylmethionine synthetase [EC:2.5.1.6]	COG0192	H	Coenzyme transport and metabolism	PTHR11964:SF1
T303_06705	GntR family transcriptional regulator	K03524	birA	BirA family transcriptional regulator, biotin operon repressor / biotin---[acetyl-CoA-carboxylase] ligase [EC:6.3.4.15]	COG0340	H	Coenzyme transport and metabolism	PTHR12835:SF5
T303_06710	hypothetical protein	not assigned	not assigned	not assigned	not assigned	not assigned	not assigned	NOHIT
T303_06715	DNA polymerase III subunit gamma/tau	K02343	dnaX	DNA polymerase III subunit gamma/tau [EC:2.7.7.7]	COG2812	L	Replication, recombination and repair	PTHR11669:SF0
T303_06720	30S ribosomal protein S1	K08968	msrC	L-methionine (R)-S-oxide reductase [EC:1.8.4.14]	COG1956	V,T	Defense mechanisms	PTHR21021:SF15
T303_06725	tRNA delta(2)-isopentenylpyrophosphate transferase	K00791	miaA, TRIT1	tRNA dimethylallyltransferase [EC:2.5.1.75]	COG0324	J	Translation, ribosomal structure and biogenesis	PTHR11088:SF25
T303_06730	hypothetical protein	not assigned	not assigned	not assigned	not assigned	not assigned	not assigned	NOHIT
T303_06735	hypothetical protein	not assigned	not assigned	not assigned	not assigned	not assigned	not assigned	NOHIT
T303_06740	tRNA Arg	K14219	tRNA-Arg	tRNA Arg	not assigned	not assigned	not assigned	NOHIT
T303_06745	50S ribosomal protein L19	K02884	RP-L19, MRPL19, rplS	large subunit ribosomal protein L19	COG0335	J	Translation, ribosomal structure and biogenesis	PTHR15680
T303_06750	voltage-gated chloride channel protein	not assigned	not assigned	not assigned	COG0038	P	Inorganic ion transport and metabolism	PTHR43427:SF5
T303_06755	chorismate mutase	K04516	AROA1, aroA	chorismate mutase [EC:5.4.99.5]	COG1605	E	Amino acid transport and metabolism	PTHR38041:SF1
T303_06760	ribonuclease HII	not assigned	not assigned	not assigned	COG0038	P	Inorganic ion transport and metabolism	PTHR45711:SF5
T303_06765	flavodoxin	not assigned	not assigned	not assigned	COG0716	C	Energy production and conversion	PTHR42809:SF1
T303_06775	Zn-dependent protease	not assigned	not assigned	not assigned	COG5549	O	Posttranslational modification, protein turnover, chaperones	PTHR10201
T303_06780	acetyl esterase	K03930	estA	putative tributyrin esterase [EC:3.1.1.-]	COG0627	V	Defense mechanisms	PTHR42797:SF2
T303_06785	ribonuclease J	K12574	rnj	ribonuclease J [EC:3.1.-.-]	COG0595	J	Translation, ribosomal structure and biogenesis	PTHR43694:SF4
T303_06790	phosphonate ABC transporter ATP-binding protein	K05833	ABC.X4.A	putative ABC transport system ATP-binding protein	COG1101	R	General function prediction only	PTHR42788:SF12
T303_06795	branched-chain amino acid ABC transporter permease	K05832	ABC.X4.P	putative ABC transport system permease protein	COG4120	R	General function prediction only	PTHR32196
T303_06800	peptide ABC transporter substrate-binding protein	K01989	ABC.X4.S	putative ABC transport system substrate-binding protein	COG2984	R	General function prediction only	PTHR35271:SF1
T303_06805	hypothetical protein	not assigned	not assigned	not assigned	not assigned	not assigned	not assigned	NOHIT
T303_06810	hypothetical protein	not assigned	not assigned	not assigned	not assigned	not assigned	not assigned	NOHIT
T303_06815	hypothetical protein	not assigned	not assigned	not assigned	not assigned	not assigned	not assigned	NOHIT
T303_06820	hypothetical protein	not assigned	not assigned	not assigned	not assigned	not assigned	not assigned	NOHIT
T303_06825	hypothetical protein	not assigned	not assigned	not assigned	not assigned	not assigned	not assigned	NOHIT
T303_06830	hypothetical protein	not assigned	not assigned	not assigned	not assigned	not assigned	not assigned	NOHIT
T303_06835	transposase IS1193	not assigned	not assigned	not assigned	COG3464	X	Mobilome - prophages, transposons	PTHR33498:SF1
T303_06840	pyruvate kinase	K00873	PK, pyk	pyruvate kinase [EC:2.7.1.40]	COG0469	G	Carbohydrate transport and metabolism	PTHR11817:SF3
T303_06845	6-phosphofructokinase	K00850	pfkA, PFK	6-phosphofructokinase 1 [EC:2.7.1.11]	COG0205	G	Carbohydrate transport and metabolism	PTHR13697:SF4
T303_06850	DNA polymerase III subunit alpha	K02337	dnaE	DNA polymerase III subunit alpha [EC:2.7.7.7]	COG0587	L	Replication, recombination and repair	PTHR32294
T303_06855	translation factor (SUA5)	not assigned	not assigned	not assigned	COG0009	J	Translation, ribosomal structure and biogenesis	PTHR17490
T303_06860	isopropylmalate isomerase	K01704	leuD, IPMI-S	3-isopropylmalate/(R)-2-methylmalate dehydratase small subunit [EC:4.2.1.33 4.2.1.35]	COG0066	E	Amino acid transport and metabolism	PTHR43345:SF5
T303_06865	isopropylmalate isomerase	K01703	leuC, IPMI-L	3-isopropylmalate/(R)-2-methylmalate dehydratase large subunit [EC:4.2.1.33 4.2.1.35]	COG0065	E	Amino acid transport and metabolism	PTHR43822:SF9
T303_06870	membrane protein	not assigned	not assigned	not assigned	COG3326	S	Function unknown	PTHR12962:SF1
T303_06875	3-isopropylmalate dehydrogenase	K00052	leuB, IMDH	3-isopropylmalate dehydrogenase [EC:1.1.1.85]	COG0473	E,C	Amino acid transport and metabolism	PTHR42979:SF1
T303_06880	2-isopropylmalate synthase	K01649	leuA, IMS	2-isopropylmalate synthase [EC:2.3.3.13]	COG0119	E	Amino acid transport and metabolism	PTHR10277:SF9
T303_06885	phosphoglycerate mutase	K01834	PGAM, gpmA	2,3-bisphosphoglycerate-dependent phosphoglycerate mutase [EC:5.4.2.11]	COG0588	G	Carbohydrate transport and metabolism	PTHR11931
T303_06890	dihydroorotate dehydrogenase	K00226	pyrD	dihydroorotate dehydrogenase (fumarate) [EC:1.3.98.1]	COG0167	F	Nucleotide transport and metabolism	PTHR43843
T303_06895	hypothetical protein	not assigned	not assigned	not assigned	not assigned	not assigned	not assigned	NOHIT
T303_06900	transcriptional regulator	K03530	hupB	DNA-binding protein HU-beta	COG0776	L	Replication, recombination and repair	PTHR33175:SF3
T303_06905	membrane protein	not assigned	not assigned	not assigned	COG4698	S	Function unknown	NOHIT
T303_06910	GDSL family lipase	not assigned	not assigned	not assigned	COG2755	E	Amino acid transport and metabolism	PTHR30383
T303_06915	hypothetical protein	not assigned	not assigned	not assigned	COG1307	I	Lipid transport and metabolism	PTHR33434:SF6
T303_06920	DNA repair protein RecN	K03631	recN	DNA repair protein RecN (Recombination protein N)	COG0497	L	Replication, recombination and repair	PTHR11059:SF0
T303_06925	ArgR family transcriptional regulator	K03402	argR, ahrC	transcriptional regulator of arginine metabolism	COG1438	K	Transcription	PTHR34471:SF1
T303_06930	cell division protein FtsJ	K06442	tlyA	23S rRNA (cytidine1920-2'-O)/16S rRNA (cytidine1409-2'-O)-methyltransferase [EC:2.1.1.226 2.1.1.227]	COG1189	J	Translation, ribosomal structure and biogenesis	PTHR32319:SF0
T303_06935	geranyltranstransferase	K13789	GGPS	geranylgeranyl diphosphate synthase, type II [EC:2.5.1.1 2.5.1.10 2.5.1.29]	COG0142	H	Coenzyme transport and metabolism	PTHR43281:SF1
T303_06940	exodeoxyribonuclease VII small subunit	K03602	xseB	exodeoxyribonuclease VII small subunit [EC:3.1.11.6]	COG1722	L	Replication, recombination and repair	PTHR34137:SF1
T303_06945	exodeoxyribonuclease VII large subunit	K03601	xseA	exodeoxyribonuclease VII large subunit [EC:3.1.11.6]	COG1570	L	Replication, recombination and repair	PTHR30008:SF0
T303_06950	hypothetical protein	not assigned	not assigned	not assigned	not assigned	not assigned	not assigned	NOHIT
T303_06955	hypothetical protein	not assigned	not assigned	not assigned	not assigned	not assigned	not assigned	NOHIT
T303_06960	hypothetical protein	not assigned	not assigned	not assigned	not assigned	not assigned	not assigned	NOHIT
T303_06965	endonuclease III	K10773	NTH	endonuclease III [EC:4.2.99.18]	COG0177	L	Replication, recombination and repair	PTHR10359:SF18
T303_06970	DNA replication protein DnaD	K02086	dnaD	DNA replication protein	COG3935	L	Replication, recombination and repair	PTHR37293:SF6
T303_06975	homoserine O-succinyltransferase	K00651	metA	homoserine O-succinyltransferase/O-acetyltransferase [EC:2.3.1.46 2.3.1.31]	COG1897	E	Amino acid transport and metabolism	PTHR20919:SF0
T303_06980	adenine phosphoribosyltransferase	K00759	APRT, apt	adenine phosphoribosyltransferase [EC:2.4.2.7]	COG0503	F	Nucleotide transport and metabolism	PTHR32315:SF3
T303_06985	single-stranded DNA exonuclease	K07462	recJ	single-stranded-DNA-specific exonuclease [EC:3.1.-.-]	COG0608	L	Replication, recombination and repair	PTHR30255:SF2
T303_06990	short-chain dehydrogenase	K07124	K07124	uncharacterized protein	COG0300	R	General function prediction only	PTHR44196:SF3
T303_06995	ribonuclease Z	K00784	rnz	ribonuclease Z [EC:3.1.26.11]	COG1234	J	Translation, ribosomal structure and biogenesis	PTHR46018:SF2
T303_07000	cystathionine beta-lyase	not assigned	not assigned	not assigned	not assigned	not assigned	not assigned	NOHIT
T303_07005	GTP-binding protein HflX	K03665	hflX	GTPase	COG2262	J	Translation, ribosomal structure and biogenesis	PTHR10229
T303_07010	transposase IS1198	not assigned	not assigned	not assigned	COG3039	X	Mobilome - prophages, transposons	PTHR35604
T303_07015	cell division protein	K05837	rodA, mrdB	rod shape determining protein RodA	COG0772	D	Cell cycle control, cell division, chromosome partitioning	PTHR30474:SF1
T303_07020	phosphoribosyl-ATP pyrophosphatase	K01523	hisE	phosphoribosyl-ATP pyrophosphohydrolase [EC:3.6.1.31]	COG0140	E	Amino acid transport and metabolism	PTHR42945:SF1
T303_07025	phosphoribosyl-AMP cyclohydrolase	K01496	hisI	phosphoribosyl-AMP cyclohydrolase [EC:3.5.4.19]	COG0139	E	Amino acid transport and metabolism	PTHR42945:SF3
T303_07030	imidazole glycerol phosphate synthase	K02500	hisF	imidazole glycerol-phosphate synthase subunit HisF [EC:4.3.2.10]	COG0107	E	Amino acid transport and metabolism	PTHR21235:SF2
T303_07035	1-(5-phosphoribosyl)-5-[(5-phosphoribosylamino)methylideneamino] imidazole-4-carboxamide isomerase	K01814	hisA	phosphoribosylformimino-5-aminoimidazole carboxamide ribotide isomerase [EC:5.3.1.16]	COG0106	E	Amino acid transport and metabolism	PTHR43090
T303_07040	imidazole glycerol phosphate synthase	K02501	hisH	imidazole glycerol-phosphate synthase subunit HisH [EC:4.3.2.10]	COG0118	E	Amino acid transport and metabolism	PTHR42701:SF1
T303_07045	imidazoleglycerol-phosphate dehydratase	K01693	hisB	imidazoleglycerol-phosphate dehydratase [EC:4.2.1.19]	COG0131	E	Amino acid transport and metabolism	PTHR23133:SF2
T303_07050	histidinol dehydrogenase	K00013	hisD	histidinol dehydrogenase [EC:1.1.1.23]	COG0141	E	Amino acid transport and metabolism	PTHR21256
T303_07055	ATP phosphoribosyltransferase	K00765	hisG	ATP phosphoribosyltransferase [EC:2.4.2.17]	COG0040	E	Amino acid transport and metabolism	PTHR21403:SF4
T303_07060	ATP phosphoribosyltransferase	K02502	hisZ	ATP phosphoribosyltransferase regulatory subunit	COG3705	E	Amino acid transport and metabolism	PTHR43707:SF3
T303_07065	histidinol-phosphate aminotransferase	K00817	hisC	histidinol-phosphate ami notransferase [EC:2.6.1.9]	COG0079	E	Amino acid transport and metabolism	PTHR43643:SF3
T303_07080	transposase IS861	K07497	K07497	putative transposase	not assigned	not assigned	not assigned	PTHR42648:SF3
T303_07090	exopolysaccharide biosynthesis protein	not assigned	not assigned	not assigned	not assigned	not assigned	not assigned	PTHR40446:SF2
T303_07095	exopolysaccharide biosynthesis protein	not assigned	not assigned	not assigned	not assigned	not assigned	not assigned	NOHIT
T303_07100	hypothetical protein	K04486	E3.1.3.15B	histidinol-phosphatase (PHP family) [EC:3.1.3.15]	COG1387	E,R	Amino acid transport and metabolism	PTHR21039:SF0
T303_07105	membrane protein	not assigned	not assigned	not assigned	COG4478	S	Function unknown	NOHIT
T303_07110	HAD family hydrolase	K01101	E3.1.3.41	4-nitrophenyl phosphatase [EC:3.1.3.41]	COG0647	F	Nucleotide transport and metabolism	PTHR19288:SF68
T303_07115	acyl-ACP thioesterase	K01071	MCH	medium-chain acyl-[acyl-carrier-protein] hydrolase [EC:3.1.2.21]	COG3884	I	Lipid transport and metabolism	PTHR31727:SF7
T303_07120	coproporphyrinogen III oxidase	not assigned	not assigned	not assigned	COG0635	H	Coenzyme transport and metabolism	PTHR13932:SF5
T303_07125	hypothetical protein	not assigned	not assigned	not assigned	not assigned	not assigned	not assigned	NOHIT
T303_07130	hypothetical protein	not assigned	not assigned	not assigned	not assigned	not assigned	not assigned	NOHIT
T303_07135	hypothetical protein	not assigned	not assigned	not assigned	not assigned	not assigned	not assigned	NOHIT
T303_07150	transposase IS1193	not assigned	not assigned	not assigned	COG3464	X	Mobilome - prophages, transposons	PTHR33498:SF1
T303_07155	dTDP-glucose 4,6-dehydratase	K01710	E4.2.1.46, rfbB, rffG	dTDP-glucose 4,6-dehydratase [EC:4.2.1.46]	COG1088	M	Cell wall/membrane/envelope biogenesis	PTHR43000:SF16
T303_07160	dTDP-4-keto-L-rhamnose reductase	K01790	rfbC, rmlC	dTDP-4-dehydrorhamnose 3,5-epimerase [EC:5.1.3.13]	COG1898	M	Cell wall/membrane/envelope biogenesis	PTHR21047:SF2
T303_07165	dTDP-glucose pyrophosphorylase	K00973	E2.7.7.24, rfbA, rffH	glucose-1-phosphate thymidylyltransferase [EC:2.7.7.24]	COG1209	M	Cell wall/membrane/envelope biogenesis	PTHR43532
T303_07170	glycine/D-amino acid oxidase (Deaminating)	not assigned	not assigned	not assigned	COG0665	E	Amino acid transport and metabolism	PTHR13847:SF253
T303_07180	hypothetical protein	not assigned	not assigned	not assigned	COG0327	H	Coenzyme transport and metabolism	PTHR13799
T303_07185	SAM-dependent methyltransferase	K06967	trmK	tRNA (adenine22-N1)-methyltransferase [EC:2.1.1.217]	COG2384	J	Translation, ribosomal structure and biogenesis	PTHR38451:SF1
T303_07190	sugar translocase	not assigned	not assigned	not assigned	COG2246	I	Lipid transport and metabolism	PTHR38459:SF3
T303_07195	phosphoglucosamine mutase	K03431	glmM	phosphoglucosamine mutase [EC:5.4.2.10]	COG1109	G	Carbohydrate transport and metabolism	PTHR42946:SF1
T303_07200	hypothetical protein	not assigned	not assigned	not assigned	COG4856	S	Function unknown	PTHR37804:SF1
T303_07205	membrane protein	K18672	dacA	diadenylate cyclase [EC:2.7.7.85]	COG1624	T	Signal transduction mechanisms	PTHR34185:SF1
T303_07210	UDP-N-acetylmuramyl peptide synthase	K01928	murE	UDP-N-acetylmuramoyl-L-alanyl-D-glutamate--2,6-diaminopimelate ligase [EC:6.3.2.13]	COG0769	M	Cell wall/membrane/envelope biogenesis	PTHR23135:SF7
T303_07215	glutamine amidotransferase	K07009	K07009	uncharacterized protein	COG3442	R	General function prediction only	PTHR21343:SF9
T303_07220	lysyl-tRNA synthetase (class II)	K14205	mprF, fmtC	phosphatidylglycerol lysyltransferase [EC:2.3.2.3]	COG2898	S	Function unknown	PTHR34697:SF2
T303_07225	oxidoreductase	not assigned	not assigned	not assigned	COG0596	H,R	Coenzyme transport and metabolism	PTHR43433
T303_07235	multidrug ABC transporter ATP-binding protein	K06158	ABCF3	ATP-binding cassette, subfamily F, member 3	COG0488	R	General function prediction only	PTHR19211:SF95
T303_07240	uridine/cytidine kinase	K00876	udk, UCK	uridine kinase [EC:2.7.1.48]	COG0572	F	Nucleotide transport and metabolism	PTHR10285:SF75
T303_07245	RNA helicase	not assigned	not assigned	not assigned	COG0513	L	Replication, recombination and repair	PTHR24031:SF125
T303_07250	hypothetical protein	not assigned	not assigned	not assigned	not assigned	not assigned	not assigned	NOHIT
T303_07255	glyceraldehyde-3-phosphate dehydrogenase	K00131	gapN	glyceraldehyde-3-phosphate dehydrogenase (NADP+) [EC:1.2.1.9]	COG1012	C	Energy production and conversion	PTHR42991:SF2
T303_07260	transposase IS1193	not assigned	not assigned	not assigned	COG3464	X	Mobilome - prophages, transposons	PTHR33498:SF1
T303_07265	phosphoenolpyruvate-protein phosphotransferase	K08483	PTS-EI.PTSI, ptsI	phosphotransferase system, enzyme I, PtsI [EC:2.7.3.9]	COG1080	G	Carbohydrate transport and metabolism	PTHR46244:SF3
T303_07270	phosphocarrier protein HPr	K11189	PTS-HPR	phosphocarrier protein	COG1925	T,G	Signal transduction mechanisms	PTHR33705:SF4
T303_07275	isocitrate dehydrogenase	K00031	IDH1, IDH2, icd	isocitrate dehydrogenase [EC:1.1.1.42]	COG0538	C	Energy production and conversion	PTHR43504:SF1
T303_07280	citrate synthase	K01647	CS, gltA	citrate synthase [EC:2.3.3.1]	COG0372	C	Energy production and conversion	PTHR11739:SF4
T303_07285	aconitate hydratase	K01681	ACO, acnA	aconitate hydratase [EC:4.2.1.3]	COG1048	C	Energy production and conversion	PTHR11670:SF49
T303_07290	hypothetical protein	not assigned	not assigned	not assigned	not assigned	not assigned	not assigned	NOHIT
T303_07295	glutaredoxin	K06191	nrdH	glutaredoxin-like protein NrdH	COG0695	O	Posttranslational modification, protein turnover, chaperones	PTHR34386:SF3
T303_07300	ribonucleotide-diphosphate reductase subunit alpha	K00525	E1.17.4.1A, nrdA, nrdE	ribonucleoside-diphosphate reductase alpha chain[EC:1.17.4.1]	COG0209	F	Nucleotide transport and metabolism	PTHR11573:SF19
T303_07305	ribonucleoside-diphosphate reductase	K00526	E1.17.4.1B, nrdB, nrdF	ribonucleoside-diphosphate reductase beta chain [EC:1.17.4.1]	COG0208	F	Nucleotide transport and metabolism	PTHR23409:SF18
T303_07325	hypothetical protein	not assigned	not assigned	not assigned	COG4086	S	Function unknown	NOHIT
T303_07335	sortase	K07284	srtA	sortase A [EC:3.4.22.70]	COG3764	M	Cell wall/membrane/envelope biogenesis	NOHIT
T303_07340	DNA gyrase subunit A	K02469	gyrA	DNA gyrase subunit A [EC:5.99.1.3]	COG0188	L	Replication, recombination and repair	PTHR43493
T303_07345	lactate dehydrogenase	K00016	LDH, ldh	L-lactate dehydrogenase [EC:1.1.1.27]	COG0039	C	Energy production and conversion	PTHR43128:SF4
T303_07350	NADH oxidase	not assigned	not assigned	not assigned	COG0446	I	Lipid transport and metabolism	PTHR43429:SF1
T303_07355	heme ABC transporter ATP-binding protein	not assigned	not assigned	not assigned	COG0488	R	General function prediction only	PTHR19211:SF65
T303_07360	membrane protein	not assigned	not assigned	not assigned	COG4720	S	Function unknown	PTHR37815
T303_07370	membrane protein	not assigned	not assigned	not assigned	COG4720	S	Function unknown	PTHR37815:SF6
T303_07375	hypothetical protein	not assigned	not assigned	not assigned	not assigned	not assigned	not assigned	NOHIT
T303_07380	GntR family transcriptional regulator	not assigned	not assigned	not assigned	COG1167	K,E	Transcription	PTHR42790:SF6
T303_07385	ribonucleoside-triphosphate reductase	not assigned	not assigned	not assigned	not assigned	not assigned	not assigned	PTHR21075:SF0
T303_07395	phenylalanyl-tRNA synthase subunit beta	K01890	FARSB, pheT	phenylalanyl-tRNA synthetase beta chain [EC:6.1.1.20]	COG0072	J	Translation, ribosomal structure and biogenesis	PTHR10947:SF0
T303_07400	GNAT family acetyltransferase	not assigned	not assigned	not assigned	COG0456	J	Translation, ribosomal structure and biogenesis	PTHR42919:SF11
T303_07405	phenylalanyl-tRNA synthase subunit alpha	K01889	FARSA, pheS	phenylalanyl-tRNA synthetase alpha chain [EC:6.1.1.20]	COG0016	J	Translation, ribosomal structure and biogenesis	PTHR11538:SF48
T303_07410	hypothetical protein	not assigned	not assigned	not assigned	not assigned	not assigned	not assigned	NOHIT
T303_07415	chromosome segregation protein SMC	K03529	smc	chromosome segregation protein	COG1196	D	Cell cycle control, cell division, chromosome partitioning	PTHR43941:SF1
T303_07420	ribonuclease III	K03685	rnc, DROSHA, RNT1	ribonuclease III [EC:3.1.26.3]	COG0571	K	Transcription	PTHR11207
T303_07425	dihydrodipicolinate synthase	K01714	dapA	4-hydroxy-tetrahydrodipicolinate synthase [EC:4.3.3.7]	COG0329	E,M	Amino acid transport and metabolism	PTHR12128:SF15
T303_07430	aspartate-semialdehyde dehydrogenase	K00133	asd	aspartate-semialdehyde dehydrogenase [EC:1.2.1.11]	COG0136	E	Amino acid transport and metabolism	PTHR46278:SF2
T303_07435	acetyltransferase	K03823	pat	phosphi nothricin acetyltransferase [EC:2.3.1.183]	COG1247	E	Amino acid transport and metabolism	PTHR43420:SF9
T303_07445	cardiolipin synthetase	K06131	clsA_B	cardiolipin synthase A/B [EC:2.7.8.-]	COG1502	I	Lipid transport and metabolism	PTHR21248:SF22
T303_07450	excinuclease ABC subunit C	K03703	uvrC	excinuclease ABC subunit C	COG0322	L	Replication, recombination and repair	PTHR30562:SF1
T303_07455	HAD family hydrolase	K07025	K07025	putative hydrolase of the HAD superfamily	COG1011	H	Coenzyme transport and metabolism	PTHR47478:SF1
T303_07460	serine dehydratase subunit beta	K01752	E4.3.1.17, sdaA, sdaB, tdcG	L-serine dehydratase [EC:4.3.1.17]	COG1760	E	Amino acid transport and metabolism	PTHR30182:SF12
T303_07470	hypothetical protein	not assigned	not assigned	not assigned	not assigned	not assigned	not assigned	NOHIT
T303_07475	multidrug ABC transporter permease	K01992	ABC-2.P	ABC-2 type transport system permease protein	COG3694	R	General function prediction only	PTHR36833:SF1
T303_07490	hypothetical protein	not assigned	not assigned	not assigned	not assigned	not assigned	not assigned	NOHIT
T303_07495	transcriptional regulator	not assigned	not assigned	not assigned	COG2197	T,K	Signal transduction mechanisms	PTHR43412:SF5
T303_07500	histidine kinase	K07778	desK	two-component system, NarL family, sensor histidine kinase DesK [EC:2.7.13.3]	COG4585	T	Signal transduction mechanisms	PTHR24421:SF10
T303_07505	ABC transporter	K01992	ABC-2.P	ABC-2 type transport system permease protein	not assigned	not assigned	not assigned	PTHR43077:SF2
T303_07510	multidrug ABC transporter ATP-binding protein	K01990	ABC-2.A	ABC-2 type transport system ATP-binding protein	COG1131	V	Defense mechanisms	PTHR42711:SF10
T303_07515	hypothetical protein	not assigned	not assigned	not assigned	not assigned	not assigned	not assigned	NOHIT
T303_07520	hypothetical protein	not assigned	not assigned	not assigned	not assigned	not assigned	not assigned	NOHIT
T303_07530	major facilitator superfamily permease	not assigned	not assigned	not assigned	not assigned	not assigned	not assigned	PTHR23513:SF11
T303_07540	XRE family transcriptional regulator	not assigned	not assigned	not assigned	not assigned	not assigned	not assigned	PTHR37038:SF12
T303_07545	NUDIX hydrolase	not assigned	not assigned	not assigned	COG1051	F	Nucleotide transport and metabolism	PTHR43736:SF1
T303_07550	hypothetical protein	not assigned	not assigned	not assigned	not assigned	not assigned	not assigned	NOHIT
T303_07555	hypothetical protein	not assigned	not assigned	not assigned	not assigned	not assigned	not assigned	NOHIT
T303_07560	ABC transporter ATP-binding protein	K01990	ABC-2.A	ABC-2 type transport system ATP-binding protein	not assigned	not assigned	not assigned	PTHR42711:SF10
T303_07565	hypothetical protein	not assigned	not assigned	not assigned	COG4758	S	Function unknown	PTHR40763
T303_07570	hypothetical protein	not assigned	not assigned	not assigned	not assigned	not assigned	not assigned	PTHR40763
T303_07575	Fe-S-oxidoreductase	K06940	K06940	uncharacterized protein	COG0727	R	General function prediction only	PTHR35866
T303_07580	peptide ABC transporter permease	K02004	ABC.CD.P	putative ABC transport system permease protein	not assigned	not assigned	not assigned	PTHR46795:SF3
T303_07585	bacteriocin ABC transporter ATP-binding protein	K02003	ABC.CD.A	putative ABC transport system ATP-binding protein	COG1136	M	Cell wall/membrane/envelope biogenesis	PTHR42798:SF3
T303_07590	sensor histidine kinase	not assigned	not assigned	not assigned	COG0642	T	Signal transduction mechanisms	PTHR43711:SF10
T303_07595	two-component response transcriptional regulator	not assigned	not assigned	not assigned	COG0745	K,T	Transcription	PTHR26402:SF519
T303_07610	hypothetical protein	K16169	pbuX	xanthine permease	not assigned	not assigned	not assigned	PTHR42810:SF4
T303_07615	multidrug transporter MatE	K03327	TC.MATE, SLC47A, norM, mdtK, dinF	multidrug resistance protein, MATE family	COG0534	V	Defense mechanisms	PTHR43298:SF2
T303_07620	peptide methionine sulfoxide reductase MsrB	K12267	msrAB	peptide methionine sulfoxide reductase msrA/msrB [EC:1.8.4.11 1.8.4.12]	COG0225	O	Posttranslational modification, protein turnover, chaperones	PTHR10173:SF50
T303_07625	branched-chain amino acid ABC transporter substrate-binding protein	K03311	TC.LIVCS	branched-chain amino acid:cation transporter, LIVCS family	COG1114	E	Amino acid transport and metabolism	PTHR30588:SF0
T303_07635	hypothetical protein	not assigned	not assigned	not assigned	not assigned	not assigned	not assigned	PTHR34977:SF1
T303_07640	amino acid permease	K03294	TC.APA	basic amino acid/polyamine antiporter, APA family	COG0531	E	Amino acid transport and metabolism	PTHR43243:SF24
T303_07645	hypothetical protein	K07078	K07078	uncharacterized protein	COG3560	R	General function prediction only	PTHR43035:SF1
T303_07650	glyoxalase	K07104	catE	catechol 2,3-dioxygenase [EC:1.13.11.2]	COG2514	Q	Secondary metabolites biosynthesis, transport and catabolism	PTHR43279:SF1
T303_07655	Rrf2 family transcriptional regulator	not assigned	not assigned	not assigned	COG1959	K	Transcription	PTHR33221:SF5
T303_07660	acyltransferase	not assigned	not assigned	not assigned	COG4814	S	Function unknown	PTHR11440:SF35
T303_07665	PTS fructose transporter subunit IIA	K02761	PTS-Cel-EIIC, celB, chbC	PTS system, cellobiose-specific IIC component	COG1455	G	Carbohydrate transport and metabolism	PTHR33989
T303_07670	NAD(P)H nitroreductase	not assigned	not assigned	not assigned	COG0778	C	Energy production and conversion	PTHR43673:SF3
T303_07675	membrane protein	not assigned	not assigned	not assigned	COG3619	S	Function unknown	PTHR37314:SF2
T303_07680	aldo/keto reductase	not assigned	not assigned	not assigned	COG0656	Q	Secondary metabolites biosynthesis, transport and catabolism	PTHR43827
T303_07690	ATP-dependent Zn protease	not assigned	not assigned	not assigned	COG4868	S	Function unknown	NOHIT
T303_07695	hypothetical protein	not assigned	not assigned	not assigned	not assigned	not assigned	not assigned	NOHIT
T303_07700	hypothetical protein	not assigned	not assigned	not assigned	not assigned	not assigned	not assigned	NOHIT
T303_07710	cell wall surface anchor protein	not assigned	not assigned	not assigned	not assigned	not assigned	not assigned	NOHIT
T303_07720	hypothetical protein	not assigned	not assigned	not assigned	not assigned	not assigned	not assigned	NOHIT
T303_07725	DNA-directed DNA polymerase	K03502	umuC	DNA polymerase V	COG0389	L	Replication, recombination and repair	PTHR11076:SF33
T303_07730	hypothetical protein	not assigned	not assigned	not assigned	not assigned	not assigned	not assigned	NOHIT
T303_07735	hypothetical protein	not assigned	not assigned	not assigned	not assigned	not assigned	not assigned	NOHIT
T303_07740	hypothetical protein	not assigned	not assigned	not assigned	not assigned	not assigned	not assigned	NOHIT
T303_07745	hypothetical protein	not assigned	not assigned	not assigned	not assigned	not assigned	not assigned	NOHIT
T303_07750	threonine transporter RhtB	not assigned	not assigned	not assigned	COG1280	E	Amino acid transport and metabolism	PTHR30086
T303_07755	hypothetical protein	not assigned	not assigned	not assigned	not assigned	not assigned	not assigned	NOHIT
T303_07765	glycosyl transferase	not assigned	not assigned	not assigned	COG1442	M	Cell wall/membrane/envelope biogenesis	PTHR22916:SF47
T303_07770	ABC transporter permease	K02004	ABC.CD.P	putative ABC transport system permease protein	not assigned	not assigned	not assigned	PTHR43738
T303_07775	peptide ABC transporter ATP-binding protein	K02003	ABC.CD.A	putative ABC transport system ATP-binding protein	COG1136	M	Cell wall/membrane/envelope biogenesis	PTHR24220:SF636
T303_07785	hypothetical protein	not assigned	not assigned	not assigned	not assigned	not assigned	not assigned	NOHIT
T303_07790	hypothetical protein	not assigned	not assigned	not assigned	not assigned	not assigned	not assigned	NOHIT
T303_07795	sodium transporter	not assigned	not assigned	not assigned	not assigned	not assigned	not assigned	PTHR43298
T303_07800	hypothetical protein	not assigned	not assigned	not assigned	not assigned	not assigned	not assigned	NOHIT
T303_07805	coenzyme PQQ synthesis protein	not assigned	not assigned	not assigned	not assigned	not assigned	not assigned	PTHR11228:SF34
T303_07810	major facilitator superfamily transporter	not assigned	not assigned	not assigned	not assigned	not assigned	not assigned	PTHR23530:SF1
T303_07820	hypothetical protein	not assigned	not assigned	not assigned	not assigned	not assigned	not assigned	NOHIT
T303_07825	MutR family transcriptional regulator	not assigned	not assigned	not assigned	not assigned	not assigned	not assigned	PTHR37038:SF12
T303_07830	transposase	K07497	K07497	putative transposase	COG2801	X	Mobilome - prophages, transposons	PTHR42648:SF3
T303_07840	hypothetical protein	not assigned	not assigned	not assigned	not assigned	not assigned	not assigned	NOHIT
T303_07845	hypothetical protein	not assigned	not assigned	not assigned	not assigned	not assigned	not assigned	NOHIT
T303_07850	peptidylprolyl isomerase	not assigned	not assigned	not assigned	not assigned	not assigned	not assigned	NOHIT
T303_07855	ATP-dependent dsDNA exonuclease	K03546	sbcC, rad50	DNA repair protein SbcC/Rad50	COG0419	L	Replication, recombination and repair	PTHR32114:SF2
T303_07860	ATP-dependent dsDNA exonuclease	K03547	sbcD, mre11	DNA repair protein SbcD/Mre11	COG0420	L	Replication, recombination and repair	PTHR30337:SF0
T303_07865	beta-galactosidase	K01190	lacZ	beta-galactosidase [EC:3.2.1.23]	COG3250	G	Carbohydrate transport and metabolism	PTHR46323
T303_07870	PTS sugar transporter subunit IIA	K16209	lacS, galP, rafP	lactose/raffinose/galactose permease	COG2211	G	Carbohydrate transport and metabolism	PTHR11328:SF40
T303_07875	galactose mutarotase	K01785	galM, GALM	aldose 1-epimerase [EC:5.1.3.3]	COG2017	G	Carbohydrate transport and metabolism	PTHR10091
T303_07880	UDP-glucose 4-epimerase	K01784	galE, GALE	UDP-glucose 4-epimerase [EC:5.1.3.2]	COG1087	M	Cell wall/membrane/envelope biogenesis	PTHR43725:SF16
T303_07885	galactose-1-phosphate uridylyltransferase	K00965	galT, GALT	UDPglucose--hexose-1-phosphate uridylyltransferase [EC:2.7.7.12]	COG4468	G	Carbohydrate transport and metabolism	PTHR39191:SF1
T303_07890	galactokinase	K00849	galK	galactokinase [EC:2.7.1.6]	COG0153	G	Carbohydrate transport and metabolism	PTHR10457:SF6
T303_07895	LacI family transcriptional regulator galR	K02529	lacI, galR	LacI family transcriptional regulator	COG1609	K	Transcription	PTHR30146:SF103
T303_07905	metalloendopeptidase	K08643	zmpB	zinc metalloprotease ZmpB [EC:3.4.24.-]	not assigned	not assigned	not assigned	NOHIT
T303_07910	zinc metalloprotease ZmpB	not assigned	not assigned	not assigned	not assigned	not assigned	not assigned	NOHIT
T303_07915	ABC transporter ATP-binding protein	not assigned	not assigned	not assigned	not assigned	not assigned	not assigned	PTHR19211:SF67
T303_07920	homoserine kinase	K06147	ABCB-BAC	ATP-binding cassette, subfamily B, bacterial	not assigned	not assigned	not assigned	PTHR24222
T303_07925	multidrug ABC transporter ATPase	not assigned	not assigned	not assigned	not assigned	not assigned	not assigned	PTHR24221:SF276
T303_07930	glutamate--cysteine ligase	K01919	gshA	glutamate--cysteine ligase [EC:6.3.2.2]	COG2918	H	Coenzyme transport and metabolism	PTHR38761:SF1
T303_07935	transposase IS1193	not assigned	not assigned	not assigned	not assigned	not assigned	not assigned	PTHR33498:SF1
T303_07940	pullulanase	K01200	pulA	pullulanase [EC:3.2.1.41]	not assigned	not assigned	not assigned	PTHR43631:SF1
T303_07945	pullulanase	not assigned	not assigned	not assigned	not assigned	not assigned	not assigned	PTHR43631:SF1
T303_07950	pullulanase	K01200	pulA	pullulanase [EC:3.2.1.41]	not assigned	not assigned	not assigned	PTHR43631:SF1
T303_07955	cell division protein FtsK	K03466	ftsK, spoIIIE	DNA segregation ATPase FtsK/SpoIIIE, S-DNA-T family	COG1674	D	Cell cycle control, cell division, chromosome partitioning	PTHR22683:SF41
T303_07960	ferredoxin--NADP reductase	K21567	fnr	ferredoxin/flavodoxin---NADP+ reductase [EC:1.18.1.2 1.19.1.1]	COG0492	O	Posttranslational modification, protein turnover, chaperones	PTHR42863:SF4
T303_07965	tRNA (guanine-N1)-methyltransferase	K00554	trmD	tRNA (guanine37-N1)-methyltransferase [EC:2.1.1.228]	COG0336	J	Translation, ribosomal structure and biogenesis	PTHR46417:SF1
T303_07970	16S rRNA-processing protein RimM	K02860	rimM	16S rRNA processing protein RimM	COG0806	J	Translation, ribosomal structure and biogenesis	PTHR33692:SF1
T303_07975	tRNA Glu	K14224	tRNA-Glu	tRNA Glu	not assigned	not assigned	not assigned	NOHIT
T303_07980	tRNA Gln	K14223	tRNA-Gln	tRNA Gln	not assigned	not assigned	not assigned	NOHIT
T303_07985	two-component response transcriptional regulator (CheY-like receiver and HTH DNA-binding domains), putative	K11618	liaR	two-component system, NarL family, response regulator LiaR	COG2197	T,K	Signal transduction mechanisms	PTHR43214:SF15
T303_07990	sensor kinase	K11617	liaS	two-component system, NarL family, sensor histidine kinase LiaS [EC:2.7.13.3]	COG4585	T	Signal transduction mechanisms	PTHR24421:SF37
T303_07995	transporter	not assigned	not assigned	not assigned	COG4758	S	Function unknown	NOHIT
T303_08000	hypothetical protein	K10716	kch, trkA, mthK, pch	voltage-gated potassium channel	not assigned	not assigned	not assigned	PTHR11537:SF14
T303_08005	serine/threonine protein kinase	K12132	prkC, stkP	eukaryotic-like serine/threonine-protein kinase [EC:2.7.11.1]	COG0515	T	Signal transduction mechanisms	PTHR43289
T303_08010	protein phosphatase	K20074	prpC, phpP	PPM family protein phosphatase [EC:3.1.3.16]	COG0631	T	Signal transduction mechanisms	PTHR13832:SF278
T303_08015	16S rRNA methyltransferase	K03500	rsmB, sun	16S rRNA (cytosine967-C5)-methyltransferase [EC:2.1.1.176]	COG0144	J	Translation, ribosomal structure and biogenesis	PTHR22807:SF53
T303_08020	methionyl-tRNA formyltransferase	K00604	MTFMT, fmt	methionyl-tRNA formyltransferase [EC:2.1.2.9]	COG0223	J	Translation, ribosomal structure and biogenesis	PTHR11138:SF4
T303_08025	primosome assembly protein PriA	K04066	priA	primosomal protein N' (replication factor Y) (superfamily II helicase) [EC:3.6.4.-]	COG1198	L	Replication, recombination and repair	PTHR30580:SF0
T303_08030	DNA-directed RNA polymerase subunit omega	K03060	rpoZ	DNA-directed RNA polymerase subunit omega [EC:2.7.7.6]	COG1758	K	Transcription	PTHR34476:SF1
T303_08035	guanylate kinase	K00942	E2.7.4.8, gmk	guanylate kinase [EC:2.7.4.8]	COG0194	F	Nucleotide transport and metabolism	PTHR23117
T303_08040	cell division protein FtsY	K03110	ftsY	fused signal recognition particle receptor	COG0552	U	Intracellular trafficking, secretion, and vesicular transport	PTHR43134:SF1
T303_08045	haloacid dehalogenase	not assigned	not assigned	not assigned	COG0561	R,H	General function prediction only	PTHR10000:SF8
T303_08050	HAD family hydrolase	not assigned	not assigned	not assigned	COG0561	R,H	General function prediction only	PTHR10000
T303_08055	GntR family transcriptional regulator	not assigned	not assigned	not assigned	COG1725	K	Transcription	PTHR38445:SF6
T303_08060	multidrug ABC transporter ATP-binding protein	K01990	ABC-2.A	ABC-2 type transport system ATP-binding protein	COG1131	V	Defense mechanisms	PTHR43158:SF1
T303_08065	ABC transporter permease	not assigned	not assigned	not assigned	not assigned	not assigned	not assigned	NOHIT
T303_08070	peptide ABC transporter ATP-binding protein	K10823	oppF	oligopeptide transport system ATP-binding protein	not assigned	not assigned	not assigned	PTHR43776:SF7
T303_08075	peptide ABC transporter ATP-binding protein	K15583	oppD	oligopeptide transport system ATP-binding protein	COG0444	E,P	Amino acid transport and metabolism	PTHR24220:SF607
T303_08080	peptide ABC transporter permease	K15582	oppC	oligopeptide transport system permease protein	COG1173	E,P	Amino acid transport and metabolism	PTHR43386:SF2
T303_08085	peptide ABC transporter permease	K15581	oppB	oligopeptide transport system permease protein	not assigned	not assigned	not assigned	PTHR30465:SF74
T303_08090	peptide ABC transporter ATP-binding protein	K15580	oppA, mppA	oligopeptide transport system substrate-binding protein	COG4166	E	Amino acid transport and metabolism	PTHR30290:SF10
T303_08095	transposase IS1193	not assigned	not assigned	not assigned	COG3464	X	Mobilome - prophages, transposons	PTHR33498:SF1
T303_08100	peptide ABC transporter ATP-binding protein	K15580	oppA, mppA	oligopeptide transport system substrate-binding protein	COG4166	E	Amino acid transport and metabolism	PTHR30290:SF10
T303_08105	transposase	K07483	K07483	transposase	COG2963	X	Mobilome - prophages, transposons	PTHR33215
T303_08110	transposase IS904	K07497	K07497	putative transposase	COG2801	X	Mobilome - prophages, transposons	PTHR46889:SF1
T303_08120	hydrolase, amidohydrolase superfamily	K03424	tatD	TatD DNase family protein [EC:3.1.21.-]	not assigned	not assigned	not assigned	PTHR46124
T303_08125	permease of the major facilitator superfamily	K08177	oxlT	MFS transporter, OFA family, oxalate/formate antiporter	COG2223	P	Inorganic ion transport and metabolism	PTHR11360:SF3
T303_08130	transposase	K07497	K07497	putative transposase	not assigned	not assigned	not assigned	PTHR42648:SF3
T303_08140	phosphotransacetylase	K00625	E2.3.1.8, pta	phosphate acetyltransferase [EC:2.3.1.8]	COG0280	C	Energy production and conversion	PTHR43356:SF3
T303_08145	23S rRNA pseudouridine synthase	K06180	rluD	23S rRNA pseudouridine1911/1915/1917 synthase [EC:5.4.99.23]	COG0564	J	Translation, ribosomal structure and biogenesis	PTHR21600:SF35
T303_08150	ATP-NAD kinase	K00858	ppnK, NADK	NAD+ kinase [EC:2.7.1.23]	COG0061	F	Nucleotide transport and metabolism	PTHR20275:SF0
T303_08155	GTP pyrophosphokinase	K07816	E2.7.6.5X	putative GTP pyrophosphokinase [EC:2.7.6.5]	COG2357	F,T	Nucleotide transport and metabolism	PTHR47837:SF1
T303_08160	adenylate cyclase	not assigned	not assigned	not assigned	COG4116	S	Function unknown	PTHR34948
T303_08165	ribose-phosphate pyrophosphokinase	K00948	PRPS, prsA	ribose-phosphate pyrophosphokinase [EC:2.7.6.1]	COG0462	F,E	Nucleotide transport and metabolism	PTHR10210:SF41
T303_08170	cysteine desulfurase	K04487	iscS, NFS1	cysteine desulfurase [EC:2.8.1.7]	COG1104	E	Amino acid transport and metabolism	PTHR11601:SF52
T303_08175	cysteine desulfurase	not assigned	not assigned	not assigned	not assigned	not assigned	not assigned	NOHIT
T303_08180	redox-sensing transcriptional repressor Rex	K01926	rex	redox-sensing transcriptional repressor	COG2344	K	Transcription	PTHR35786:SF1
T303_08185	gamma-glutamyl hydrolase	K07010	K07010	putative glutamine amidotransferase	COG2071	E	Amino acid transport and metabolism	PTHR43235:SF1
T303_08190	DNA repair protein RadC	K03630	radC	DNA repair protein RadC	COG2003	L	Replication, recombination and repair	PTHR30471:SF3
T303_08195	alpha-L-Rha alpha-1,3-L-rhamnosyltransferase	K07272	rgpF	rhamnosyltransferase [EC:2.4.1.-]	COG3754	M	Cell wall/membrane/envelope biogenesis	NOHIT
T303_08200	glycosyl transferase	K12998	rgpE	glucosyltransferase [EC:2.4.1.-]	not assigned	not assigned	not assigned	PTHR43685:SF2
T303_08205	polysaccharide ABC exporter ATP-binding protein	K01990	ABC-2.A	ABC-2 type transport system ATP-binding protein	COG1134	G,M	Carbohydrate transport and metabolism	PTHR46743
T303_08210	polysaccharide ABC exporter membrane-spanning protein	K01992	ABC-2.P	ABC-2 type transport system permease protein	COG1682	G,M	Carbohydrate transport and metabolism	PTHR30413
T303_08215	rhamnosyl transferase	K12997	rgpB	rhamnosyltransferase [EC:2.4.1.-]	not assigned	not assigned	not assigned	PTHR22916
T303_08220	rhamnosyl transferase	K12996	rgpA	rhamnosyltransferase [EC:2.4.1.-]	COG0438	M	Cell wall/membrane/envelope biogenesis	PTHR12526
T303_08225	beta-carotene 15,15'-monooxygenase	not assigned	not assigned	not assigned	COG4713	S	Function unknown	NOHIT
T303_08230	glycosyl transferases	not assigned	not assigned	not assigned	COG0463	M	Cell wall/membrane/envelope biogenesis	PTHR22916:SF51
T303_08235	polysaccharide biosynthesis protein transporter	not assigned	not assigned	not assigned	COG2244	M	Cell wall/membrane/envelope biogenesis	PTHR30250
T303_08240	glycosyl transferase	K09153	K09153	small membrane protein	COG2456	S	Function unknown	NOHIT
T303_08245	glycosyl transferase	not assigned	not assigned	not assigned	not assigned	not assigned	not assigned	PTHR10859:SF105
T303_08250	dTDP-4-dehydrorhamnose reductase	K00067	rfbD, rmlD	dTDP-4-dehydrorhamnose reductase [EC:1.1.1.133]	COG1091	M	Cell wall/membrane/envelope biogenesis	PTHR10491:SF4
T303_08255	transporter	not assigned	not assigned	not assigned	not assigned	not assigned	not assigned	NOHIT
T303_08260	glycosyl transferase	K12999	rgpI	glucosyltransferase [EC:2.4.1.-]	COG0463	M	Cell wall/membrane/envelope biogenesis	PTHR42992:SF2
T303_08265	aromatic ring hydroxylating protein	not assigned	not assigned	not assigned	COG2151	O	Posttranslational modification, protein turnover, chaperones	PTHR42831:SF1
T303_08270	RNA polymerase sigma factor RpoD	K03086	rpoD	RNA polymerase primary sigma factor	COG0568	K	Transcription	PTHR30603:SF0
T303_08275	DNA primase	K02316	dnaG	DNA primase [EC:2.7.7.-]	COG0358	L	Replication, recombination and repair	PTHR30313:SF2
T303_08280	histidine kinase	K03282	mscL	large conductance mechanosensitive channel	not assigned	not assigned	not assigned	NOHIT
T303_08285	30S ribosomal protein S21	K02970	RP-S21, MRPS21, rpsU	small subunit ribosomal protein S21	not assigned	not assigned	not assigned	PTHR21109
T303_08290	amino acid ABC transporter substrate-binding protein	K02030	ABC.PA.S	polar amino acid transport system substrate-binding protein	COG0834	E,T	Amino acid transport and metabolism	PTHR35936:SF17
T303_08295	aminotransferase	not assigned	not assigned	not assigned	COG0436	E	Amino acid transport and metabolism	PTHR43510:SF1
T303_08300	amino acid ABC transporter substrate-binding protein	K02030	ABC.PA.S	polar amino acid transport system substrate-binding protein	COG0834	E,T	Amino acid transport and metabolism	PTHR35936:SF17
T303_08305	amino acid ABC transporter substrate-binding protein	K02030	ABC.PA.S	polar amino acid transport system substrate-binding protein	COG0834	E,T	Amino acid transport and metabolism	PTHR35936:SF17
T303_08310	NUDIX hydrolase	K03574	mutT, NUDT15, MTH2	8-oxo-dGTP diphosphatase [EC:3.6.1.55]	COG1051	F	Nucleotide transport and metabolism	PTHR43046:SF2
T303_08315	excinuclease ABC subunit B	K03702	uvrB	excinuclease ABC subunit B	COG0556	L	Replication, recombination and repair	PTHR24029:SF0
T303_08320	hypothetical protein	not assigned	not assigned	not assigned	not assigned	not assigned	not assigned	NOHIT
T303_08325	hypothetical protein	K07052	K07052	uncharacterized protein	not assigned	not assigned	not assigned	PTHR39430:SF1
T303_08330	hypothetical protein	K07052	K07052	uncharacterized protein	not assigned	not assigned	not assigned	NOHIT
T303_08335	amino acid ABC transporter permease	K02029	ABC.PA.P	polar amino acid transport system permease protein	COG0765,COG0834	E,T	Amino acid transport and metabolism	PTHR30614:SF40
T303_08340	peptide ABC transporter ATP-binding protein	K02028	ABC.PA.A	polar amino acid transport system ATP-binding protein [EC:7.4.2.1]	COG1126	E	Amino acid transport and metabolism	PTHR43166:SF4
T303_08345	GTPase	not assigned	not assigned	not assigned	not assigned	not assigned	not assigned	NOHIT
T303_08350	GTPase CgtA	K03979	obgE, cgtA	GTPase [EC:3.6.5.-]	COG0536	D,L	Cell cycle control, cell division, chromosome partitioning	PTHR11702
T303_08355	hypothetical protein	not assigned	not assigned	not assigned	not assigned	not assigned	not assigned	NOHIT
T303_08360	16S pseudouridylate synthase	K06183	rsuA	16S rRNA pseudouridine516 synthase [EC:5.4.99.19]	COG1187	J	Translation, ribosomal structure and biogenesis	PTHR21600:SF19
T303_08365	hypothetical protein	not assigned	not assigned	not assigned	not assigned	not assigned	not assigned	PTHR36444:SF3
T303_08370	hypothetical protein	not assigned	not assigned	not assigned	not assigned	not assigned	not assigned	NOHIT
T303_08375	thioesterase	K02614	paaI	acyl-CoA thioesterase [EC:3.1.2.-]	COG2050	Q	Secondary metabolites biosynthesis, transport and catabolism	PTHR43240
T303_08380	salt-stress induced protein	not assigned	not assigned	not assigned	not assigned	not assigned	not assigned	NOHIT
T303_08385	hypothetical protein	not assigned	not assigned	not assigned	not assigned	not assigned	not assigned	PTHR30532
T303_08390	drug/metabolite transporter permease	not assigned	not assigned	not assigned	COG0697	E,G,R	Amino acid transport and metabolism	PTHR42920:SF2
T303_08395	membrane protein	not assigned	not assigned	not assigned	not assigned	not assigned	not assigned	NOHIT
T303_08400	CRISPR-associated protein Csn2	K19137	csn2	CRISPR-associated protein Csn2	not assigned	not assigned	not assigned	NOHIT
T303_08405	CRISPR-associated protein Cas2	K09951	cas2	CRISPR-associated protein Cas2	COG3512	V	Defense mechanisms	NOHIT
T303_08410	CRISPR-associated protein Cas1	not assigned	not assigned	not assigned	COG1518	V	Defense mechanisms	PTHR34353:SF2
T303_08415	CRISPR-associated protein Csn1	K09952	csn1, cas9	CRISPR-associated endonuclease Csn1 [EC:3.1.-.-]	COG3513	V	Defense mechanisms	NOHIT
T303_08420	phosphoserine phosphatase	K01079	serB, PSPH	phosphoserine phosphatase [EC:3.1.3.3]	COG0560	E	Amino acid transport and metabolism	PTHR43344:SF2
T303_08425	septation ring formation regulator EzrA	K06286	ezrA	septation ring formation regulator	COG4477	D	Cell cycle control, cell division, chromosome partitioning	PTHR32089:SF92
T303_08430	DNA gyrase subunit B	K02470	gyrB	DNA gyrase subunit B [EC:5.99.1.3]	COG0187	L	Replication, recombination and repair	PTHR45866:SF5
T303_08435	P-Ser-HPr phosphatase	not assigned	not assigned	not assigned	COG0546	C	Energy production and conversion	PTHR43434:SF1
T303_08440	membrane protein	not assigned	not assigned	not assigned	COG1346	M	Cell wall/membrane/envelope biogenesis	PTHR30249:SF10
T303_08445	murein hydrolase regulator LrgA	K06518	cidA	holin-like protein	COG1380	R	General function prediction only	PTHR33931
T303_08450	tRNA Thr	K14234	tRNA-Thr	tRNA Thr	not assigned	not assigned	not assigned	NOHIT
T303_08455	arsenate reductase	not assigned	not assigned	not assigned	COG1393	P	Inorganic ion transport and metabolism	PTHR30041:SF4
T303_08460	methylated-DNA-protein-cysteine methyltransferase	K00567	ogt, MGMT	methylated-DNA-[protein]-cysteine S-methyltransferase [EC:2.1.1.63]	not assigned	not assigned	not assigned	PTHR10815
T303_08465	3-phosphoglycerate dehydrogenase	K00058	serA, PHGDH	D-3-phosphoglycerate dehydrogenase / 2-oxoglutarate reductase [EC:1.1.1.95 1.1.1.399]	COG0111	H,R	Coenzyme transport and metabolism	PTHR42938:SF13
T303_08470	GNAT family acetyltransferase	not assigned	not assigned	not assigned	not assigned	not assigned	not assigned	PTHR43617
T303_08475	phosphoserine aminotransferase	K00831	serC, PSAT1	phosphoserine ami notransferase [EC:2.6.1.52]	COG1932	E,H	Amino acid transport and metabolism	PTHR43247:SF2
T303_08485	lactoylglutathione lyase	K01759	GLO1, gloA	lactoylglutathione lyase [EC:4.4.1.5]	COG0346	Q	Secondary metabolites biosynthesis, transport and catabolism	PTHR46036:SF5
T303_08495	spermidine/putrescine ABC transporter substrate-binding protein	K11069	potD	spermidine/putrescine transport system substrate-binding protein	COG0687	E	Amino acid transport and metabolism	PTHR30222:SF5
T303_08500	spermidine/purescine ABC transporter permease	K11070	potC	spermidine/putrescine transport system permease protein	COG1177	E	Amino acid transport and metabolism	PTHR43848:SF2
T303_08505	spermidine/putrescine ABC transporter permease	K11071	potB	spermidine/putrescine transport system permease protein	COG1176	E	Amino acid transport and metabolism	PTHR42929:SF1
T303_08510	spermidine/putrescine ABC transporter ATP-binding protein	K11072	potA	spermidine/putrescine transport system ATP-binding protein [EC:3.6.3.31]	COG3842	E	Amino acid transport and metabolism	PTHR42781:SF4
T303_08515	UDP-N-acetylenolpyruvoylglucosamine reductase	K00075	murB	UDP-N-acetylmuramate dehydrogenase [EC:1.3.1.98]	COG0812	M	Cell wall/membrane/envelope biogenesis	PTHR21071
T303_08520	2-amino-4-hydroxy-6-hydroxymethyldihydropteridine pyrophosphokinase	K00950	folK	2-amino-4-hydroxy-6-hydroxymethyldihydropteridine diphosphokinase [EC:2.7.6.3]	COG0801	H	Coenzyme transport and metabolism	PTHR43071:SF1
T303_08525	dihydroneopterin aldolase	K01633	folB	7,8-dihydroneopterin aldolase/epimerase/oxygenase [EC:4.1.2.25 5.1.99.8 1.13.11.81]	COG1539	H	Coenzyme transport and metabolism	PTHR42844:SF5
T303_08530	alpha-amylase	K01176	AMY, amyA, malS	alpha-amylase [EC:3.2.1.1]	COG0366	G	Carbohydrate transport and metabolism	PTHR43447:SF1
T303_08535	dihydropteroate synthase	K00796	folP	dihydropteroate synthase [EC:2.5.1.15]	COG0294	H	Coenzyme transport and metabolism	PTHR20941
T303_08540	GTP cyclohydrolase I	K01495	GCH1, folE	GTP cyclohydrolase IA [EC:3.5.4.16]	COG0302	H	Coenzyme transport and metabolism	PTHR11109:SF7
T303_08545	amino acid specific permease	not assigned	not assigned	not assigned	COG0531	E	Amino acid transport and metabolism	PTHR47704:SF1
T303_08550	dihydrofolate synthase	K11754	folC	dihydrofolate synthase / folylpolyglutamate synthase [EC:6.3.2.12 6.3.2.17]	COG0285	H	Coenzyme transport and metabolism	PTHR11136:SF0
T303_08555	RNA-binding protein	K06960	K06960	uncharacterized protein	COG1837	R	General function prediction only	PTHR34654:SF1
T303_08560	30S ribosomal protein S16	K02959	RP-S16, MRPS16, rpsP	small subunit ribosomal protein S16	COG0228	J	Translation, ribosomal structure and biogenesis	PTHR12919:SF20
T303_08565	tellurite resistance protein TehB	K16868	tehB	tellurite methyltransferase [EC:2.1.1.265]	COG3615	S	Function unknown	PTHR43464:SF32
T303_08575	hypothetical protein	not assigned	not assigned	not assigned	not assigned	not assigned	not assigned	NOHIT
T303_08580	exodeoxyribonuclease	K01142	E3.1.11.2, xthA	exodeoxyribonuclease III [EC:3.1.11.2]	COG0708	L	Replication, recombination and repair	PTHR22748:SF6
T303_08585	citrulline cluster-linked protein	not assigned	not assigned	not assigned	COG4708	S	Function unknown	PTHR40044:SF1
T303_08595	lipid kinase	K07029	dagK	diacylglycerol kinase (ATP) [EC:2.7.1.107]	COG1597	I,R	Lipid transport and metabolism	PTHR12358:SF77
T303_08600	DNA ligase LigA	K01972	E6.5.1.2, ligA, ligB	DNA ligase (NAD+) [EC:6.5.1.2]	COG0272	L	Replication, recombination and repair	PTHR23389:SF9
T303_08605	queuosine transporter QueT	not assigned	not assigned	not assigned	COG4708	S	Function unknown	PTHR40044:SF1
T303_08610	tRNA-processing ribonuclease BN	K07058	K07058	membrane protein	COG1295	S	Function unknown	PTHR30213:SF1
T303_08615	methionine aminopeptidase	K01265	map	methionyl aminopeptidase [EC:3.4.11.18]	COG0024	J	Translation, ribosomal structure and biogenesis	PTHR43330:SF17
T303_08620	transcriptional regulator containing CBS domains	not assigned	not assigned	not assigned	COG4109	K	Transcription	PTHR43080:SF2
T303_08625	GNAT family acetyltransferase	K03790	rimJ	[ribosomal protein S5]-alanine N-acetyltransferase [EC:2.3.1.267]	COG1670	J,O	Translation, ribosomal structure and biogenesis	PTHR43792:SF1
T303_08630	UDP-N-acetylglucosamine 1-carboxyvinyltransferase	K00790	murA	UDP-N-acetylglucosamine 1-carboxyvinyltransferase [EC:2.5.1.7]	COG0766	M	Cell wall/membrane/envelope biogenesis	PTHR43783:SF2
T303_08635	competence protein ComEC	K02238	comEC	competence protein ComEC	COG2333	R	General function prediction only	PTHR30619:SF6
T303_08640	late competence protein required for DNA binding and uptake	K02237	comEA	competence protein ComEA	COG1555	L	Replication, recombination and repair	PTHR21180:SF32
T303_08645	1-acyl-sn-glycerol-3-phosphate acyltransferase	K00655	plsC	1-acyl-sn-glycerol-3-phosphate acyltransferase [EC:2.3.1.51]	COG0204	I	Lipid transport and metabolism	PTHR10434:SF38
T303_08650	deacetylase	not assigned	not assigned	not assigned	COG0726	M,G	Cell wall/membrane/envelope biogenesis	PTHR10587
T303_08655	methyltransferase	not assigned	not assigned	not assigned	COG4123	J	Translation, ribosomal structure and biogenesis	PTHR47739:SF1
T303_08660	hypothetical protein	K07461	K07461	putative endonuclease	COG2827	L	Replication, recombination and repair	PTHR34477:SF1
T303_08665	RNA helicase	K05592	deaD, cshA	ATP-dependent RNA helicase DeaD [EC:3.6.4.13]	COG0513	L	Replication, recombination and repair	PTHR24031:SF276
T303_08670	magnesium transporter	not assigned	not assigned	not assigned	COG0598	P	Inorganic ion transport and metabolism	PTHR47891:SF1
T303_08675	helicase	not assigned	not assigned	not assigned	not assigned	not assigned	not assigned	PTHR35796:SF3
T303_08680	proton-coupled thiamine transporter YuaJ	K16789	thiT	thiamine transporter	COG3859	H	Coenzyme transport and metabolism	PTHR38438:SF1
T303_08685	MutR family transcriptional regulator	not assigned	not assigned	not assigned	not assigned	not assigned	not assigned	PTHR37038:SF12
T303_08690	permease of the major facilitator superfamily	not assigned	not assigned	not assigned	not assigned	not assigned	not assigned	PTHR23513:SF11
T303_08695	peptide chain release factor 3	K02837	prfC	peptide chain release factor 3	COG4108	J	Translation, ribosomal structure and biogenesis	PTHR43556:SF2
T303_08700	hypothetical protein	not assigned	not assigned	not assigned	not assigned	not assigned	not assigned	NOHIT
T303_08705	UDP-N-acetylmuramoyl-tripeptide--D-alanyl-D-alanine ligase	K01929	murF	UDP-N-acetylmuramoyl-tripeptide--D-alanyl-D-alanine ligase [EC:6.3.2.10]	COG0770	M	Cell wall/membrane/envelope biogenesis	PTHR43024:SF1
T303_08720	amino acid ABC transporter substrate-binding protein	K02030	ABC.PA.S	polar amino acid transport system substrate-binding protein	COG0834	E,T	Amino acid transport and metabolism	PTHR35936:SF17
T303_08725	glutamine ABC transporter ATP-binding protein	K02028	ABC.PA.A	polar amino acid transport system ATP-binding protein [EC:7.4.2.1]	COG1126	E	Amino acid transport and metabolism	PTHR43166:SF23
T303_08730	amino acid ABC transporter permease	K02029	ABC.PA.P	polar amino acid transport system permease protein	COG0765	E	Amino acid transport and metabolism	PTHR30614:SF36
T303_08735	polar amino acid ABC transporter permease	K02029	ABC.PA.P	polar amino acid transport system permease protein	COG0765	E	Amino acid transport and metabolism	PTHR30614:SF37
T303_08740	D-alanine--D-alanine ligase	K01921	ddl	D-alanine-D-alanine ligase [EC:6.3.2.4]	COG1181	M,R	Cell wall/membrane/envelope biogenesis	PTHR23132:SF8
T303_08745	copper-binding protein	not assigned	not assigned	not assigned	not assigned	not assigned	not assigned	PTHR10003:SF27
T303_08750	ActP protein	K17686	copA, ATP7	Cu+-exporting ATPase [EC:3.6.3.54]	COG2217	P	Inorganic ion transport and metabolism	PTHR43520
T303_08755	uracil phosphoribosyltransferase	not assigned	not assigned	not assigned	COG3682	K	Transcription	PTHR34134:SF1
T303_08760	tryptophan synthase subunit alpha	K01695	trpA	tryptophan synthase alpha chain [EC:4.2.1.20]	COG0159	E	Amino acid transport and metabolism	PTHR43455:SF1
T303_08765	tryptophan synthase subunit beta	K01696	trpB	tryptophan synthase beta chain [EC:4.2.1.20]	COG0133	E	Amino acid transport and metabolism	PTHR42882
T303_08770	N-(5'-phosphoribosyl)anthranilate isomerase	K01817	trpF	phosphoribosylanthranilate isomerase [EC:5.3.1.24]	COG0135	E	Amino acid transport and metabolism	PTHR42894
T303_08775	indole-3-glycerol-phosphate synthase	K01609	trpC	indole-3-glycerol phosphate synthase [EC:4.1.1.48]	COG0134	E	Amino acid transport and metabolism	PTHR22854
T303_08780	anthranilate phosphoribosyltransferase	K00766	trpD	anthranilate phosphoribosyltransferase [EC:2.4.2.18]	COG0547	E	Amino acid transport and metabolism	PTHR43285:SF2
T303_08785	anthranilate synthase subunit II	K01658	trpG	anthranilate synthase component II [EC:4.1.3.27]	COG0512	E,H	Amino acid transport and metabolism	PTHR43418:SF8
T303_08790	anthranilate synthase subunit I	K01657	trpE	anthranilate synthase component I [EC:4.1.3.27]	COG0147	E,H	Amino acid transport and metabolism	PTHR11236:SF9
T303_08795	chorismate mutase	not assigned	not assigned	not assigned	COG1605	E	Amino acid transport and metabolism	PTHR38041:SF1
T303_08800	dihydroorotate dehydrogenase	not assigned	not assigned	not assigned	not assigned	not assigned	not assigned	NOHIT
T303_08805	ATPase	K12952	ctpE	cation-transporting P-type ATPase E [EC:3.6.3.-]	COG0474	P	Inorganic ion transport and metabolism	PTHR24093:SF422
T303_08810	hypothetical protein	not assigned	not assigned	not assigned	not assigned	not assigned	not assigned	NOHIT
T303_08815	hypothetical protein	K09747	K09747	uncharacterized protein	COG0718	R	General function prediction only	PTHR33449:SF1
T303_08825	MerR family transcriptional regulator	not assigned	not assigned	not assigned	COG0789	K	Transcription	PTHR30204
T303_08830	DNA polymerase III subunit epsilon	K02342	dnaQ	DNA polymerase III subunit epsilon [EC:2.7.7.7]	not assigned	not assigned	not assigned	PTHR30231
T303_08835	hypothetical protein	not assigned	not assigned	not assigned	not assigned	not assigned	not assigned	PTHR24567:SF58
T303_08840	metal-sulfur cluster biosynthetic enzyme	not assigned	not assigned	not assigned	COG2151	O	Posttranslational modification, protein turnover, chaperones	PTHR42831:SF1
T303_08845	dihydroxy-acid dehydratase	K01687	ilvD	dihydroxy-acid dehydratase [EC:4.2.1.9]	COG0129	E,G	Amino acid transport and metabolism	PTHR21000:SF5
T303_08850	pyridine nucleotide-disulfide oxidoreductase	K07007	baiN	3-dehydro-bile acid Delta4,6-reductase [EC:1.3.1.114]	COG2081	R	General function prediction only	PTHR42887:SF2
T303_08855	tRNA Ser	K14233	tRNA-Ser	tRNA Ser	not assigned	not assigned	not assigned	NOHIT
T303_08860	tRNA (guanine-N(7)-)-methyltransferase	K03439	trmB, METTL1, TRM8	tRNA (guanine-N7-)-methyltransferase [EC:2.1.1.33]	COG0220	J	Translation, ribosomal structure and biogenesis	PTHR23417:SF14
T303_08865	aminoglycoside phosphotransferase	not assigned	not assigned	not assigned	COG0510	H	Coenzyme transport and metabolism	PTHR40086:SF1
T303_08870	ABC-type exoprotein transport system, permease component	K01992	ABC-2.P	ABC-2 type transport system permease protein	COG4473	U	Intracellular trafficking, secretion, and vesicular transport	NOHIT
T303_08875	multidrug ABC transporter ATP-binding protein	K01990	ABC-2.A	ABC-2 type transport system ATP-binding protein	COG1131	V	Defense mechanisms	PTHR42939:SF5
T303_08880	histidine triad protein	K02503	HINT1, hinT, hit	histidine triad (HIT) family protein	COG0537	F,R,G	Nucleotide transport and metabolism	PTHR46648:SF1
T303_08885	hypothetical protein	not assigned	not assigned	not assigned	not assigned	not assigned	not assigned	PTHR37614:SF1
T303_08890	hypothetical protein	not assigned	not assigned	not assigned	not assigned	not assigned	not assigned	NOHIT
T303_08895	phosphoribosylglycinamide synthetase	not assigned	not assigned	not assigned	not assigned	not assigned	not assigned	NOHIT
T303_08900	hypothetical protein	not assigned	not assigned	not assigned	not assigned	not assigned	not assigned	NOHIT
T303_08905	ATP-dependent Clp protease ATP-binding protein	K04086	clpL	ATP-dependent Clp protease ATP-binding subunit ClpL	COG0542	O	Posttranslational modification, protein turnover, chaperones	PTHR43572:SF11
T303_08910	hypothetical protein	not assigned	not assigned	not assigned	COG1323	R	General function prediction only	PTHR37825:SF1
T303_08915	SAM-dependent methyltransferase	not assigned	not assigned	not assigned	not assigned	not assigned	not assigned	PTHR43591:SF16
T303_08920	Iojap family protein	K09710	ybeB	ribosome-associated protein	COG0799	J	Translation, ribosomal structure and biogenesis	PTHR21043:SF0
T303_08925	hypothetical protein	not assigned	not assigned	not assigned	COG1713	R	General function prediction only	PTHR35795:SF1
T303_08930	nicotinic acid mononucleotide adenylyltransferase	K00969	nadD	nicotinate-nucleotide adenylyltransferase [EC:2.7.7.18]	COG1057	H	Coenzyme transport and metabolism	PTHR39321:SF3
T303_08935	RNA-binding protein	K07574	yhbY	RNA-binding protein	COG1534	J	Translation, ribosomal structure and biogenesis	PTHR40065:SF3
T303_08940	GTPase	K06948	yqeH	30S ribosome assembly GTPase	COG1161	J	Translation, ribosomal structure and biogenesis	PTHR46434:SF1
T303_08945	HAD family hydrolase	K07015	K07015	uncharacterized protein	COG2179	R	General function prediction only	PTHR19288:SF25
T303_08950	multidrug DMT transporter permease	not assigned	not assigned	not assigned	COG5006	E	Amino acid transport and metabolism	PTHR22911:SF74
T303_08955	hypothetical protein	not assigned	not assigned	not assigned	not assigned	not assigned	not assigned	NOHIT
T303_08960	aspartyl/glutamyl-tRNA amidotransferase subunit B	K02434	gatB, PET112	aspartyl-tRNA(Asn)/glutamyl-tRNA(Gln) amidotransferase subunit B [EC:6.3.5.6 6.3.5.7]	COG0064	J	Translation, ribosomal structure and biogenesis	PTHR11659:SF0
T303_08965	aspartyl/glutamyl-tRNA amidotransferase subunit A	K02433	gatA, QRSL1	aspartyl-tRNA(Asn)/glutamyl-tRNA(Gln) amidotransferase subunit A [EC:6.3.5.6 6.3.5.7]	COG0154	J	Translation, ribosomal structure and biogenesis	PTHR11895:SF7
T303_08970	glutamyl-tRNA amidotransferase subunit C	K02435	gatC, GATC	aspartyl-tRNA(Asn)/glutamyl-tRNA(Gln) amidotransferase subunit C [EC:6.3.5.6 6.3.5.7]	COG0721	J	Translation, ribosomal structure and biogenesis	PTHR15004:SF0
T303_08975	glycosyltransferase	not assigned	not assigned	not assigned	not assigned	not assigned	not assigned	NOHIT
T303_08980	6-phospho-beta-glucosidase	K01223	E3.2.1.86B, bglA	6-phospho-beta-glucosidase [EC:3.2.1.86]	COG2723	G	Carbohydrate transport and metabolism	PTHR10353:SF122
T303_08985	hypothetical protein	not assigned	not assigned	not assigned	not assigned	not assigned	not assigned	NOHIT
T303_08990	methionine sulfoxide reductase A	K07304	msrA	peptide-methionine (S)-S-oxide reductase [EC:1.8.4.11]	COG0225	O	Posttranslational modification, protein turnover, chaperones	PTHR43774:SF1
T303_08995	O-sialoglycoprotein endopeptidase	K02073	metQ	D-methionine transport system substrate-binding protein	COG1464	P	Inorganic ion transport and metabolism	PTHR30429:SF3
T303_09000	isochorismatase	not assigned	not assigned	not assigned	COG1335	H,R	Coenzyme transport and metabolism	PTHR43540
T303_09005	GTP-sensing transcriptional pleiotropic repressor codY	K03706	codY	transcriptional pleiotropic repressor	COG4465	K	Transcription	PTHR40062:SF1
T303_09010	aminotransferase AlaT	K14260	alaA	alanine-synthesizing transaminase [EC:2.6.1.66 2.6.1.2]	COG0436	E	Amino acid transport and metabolism	PTHR43488:SF2
T303_09015	universal stress protein UspA	not assigned	not assigned	not assigned	COG0589	T	Signal transduction mechanisms	PTHR46268
T303_09025	hypothetical protein	not assigned	not assigned	not assigned	not assigned	not assigned	not assigned	NOHIT
T303_09030	membrane protein	not assigned	not assigned	not assigned	not assigned	not assigned	not assigned	NOHIT
T303_09035	pyruvate formate lyase-activating protein	K04069	pflA, pflC, pflE	pyruvate formate lyase activating enzyme [EC:1.97.1.4]	COG1180	O	Posttranslational modification, protein turnover, chaperones	PTHR30352:SF5
T303_09040	putative transport protein	K03699	tlyC	putative hemolysin	COG1253	R	General function prediction only	PTHR22777:SF3
T303_09045	molybdenum ABC transporter ATP-binding protein	K02013	ABC.FEV.A	iron complex transport system ATP-binding protein [EC:3.6.3.34]	COG1119	P	Inorganic ion transport and metabolism	PTHR43553:SF3
T303_09050	sodium:hydrogen antiporter	K03316	TC.CPA1	monovalent cation:H+ antiporter, CPA1 family	COG0025	P	Inorganic ion transport and metabolism	PTHR10110:SF86
T303_09055	hypothetical protein	not assigned	not assigned	not assigned	not assigned	not assigned	not assigned	NOHIT
T303_09060	SAM-dependent methyltransferase	not assigned	not assigned	not assigned	not assigned	not assigned	not assigned	PTHR35276:SF1
T303_09065	Fe-S oxidoreductase	K07139	K07139	uncharacterized protein	COG1242	R	General function prediction only	PTHR11135:SF1
T303_09070	peptidase S16	K07177	K07177	Lon-like protease	COG3480	T	Signal transduction mechanisms	PTHR10046:SF48
T303_09075	phosphopantetheine adenylyltransferase	K00954	E2.7.7.3A, coaD, kdtB	pantetheine-phosphate adenylyltransferase [EC:2.7.7.3]	COG0669	H	Coenzyme transport and metabolism	PTHR21342:SF1
T303_09080	rRNA methyltransferase	not assigned	not assigned	not assigned	COG0742	J	Translation, ribosomal structure and biogenesis	PTHR43542:SF1
T303_09085	thioredoxin reductase	K00384	trxB, TRR	thioredoxin reductase (NADPH) [EC:1.8.1.9]	COG0492	O	Posttranslational modification, protein turnover, chaperones	PTHR42863:SF6
T303_09090	thioredoxin	not assigned	not assigned	not assigned	not assigned	not assigned	not assigned	NOHIT
T303_09095	amino acid ABC transporter ATP-binding protein	K02028	ABC.PA.A	polar amino acid transport system ATP-binding protein [EC:7.4.2.1]	COG1126	E	Amino acid transport and metabolism	PTHR43166:SF21
T303_09100	amino acid ABC transporter permease	K02029	ABC.PA.P	polar amino acid transport system permease protein	COG0765	E	Amino acid transport and metabolism	PTHR30614:SF16
T303_09105	amino acid ABC transporter substrate-binding protein	K02030	ABC.PA.S	polar amino acid transport system substrate-binding protein	COG0834	E,T	Amino acid transport and metabolism	PTHR35936:SF16
T303_09110	hypothetical protein	not assigned	not assigned	not assigned	not assigned	not assigned	not assigned	NOHIT
T303_09115	DNA polymerase IV	K02346	dinB	DNA polymerase IV [EC:2.7.7.7]	COG0389	L	Replication, recombination and repair	PTHR11076:SF33
T303_09120	formate acetyltransferase	K00656	E2.3.1.54, pflD	formate C-acetyltransferase [EC:2.3.1.54]	COG1882	C	Energy production and conversion	PTHR30191
T303_09125	carbonate dehydratase	K01674	cah	carbonic anhydrase [EC:4.2.1.1]	COG3338	P	Inorganic ion transport and metabolism	PTHR18952:SF131
T303_09130	GNAT family acetyltransferase	not assigned	not assigned	not assigned	COG2153	R	General function prediction only	PTHR13355:SF8
T303_09135	type I restriction endonuclease subunit S	K01154	hsdS	type I restriction enzyme, S subunit [EC:3.1.21.3]	not assigned	not assigned	not assigned	PTHR30408:SF9
T303_09140	hypothetical protein	not assigned	not assigned	not assigned	not assigned	not assigned	not assigned	NOHIT
T303_09145	ABC transporter permease	K02069	ABC.X2.P	putative ABC transport system permease protein	COG0390	P	Inorganic ion transport and metabolism	PTHR30028:SF0
T303_09150	putrescine/spermidine ABC transporter ATP-binding protein	K02068	ABC.X2.A	putative ABC transport system ATP-binding protein	COG4619	P	Inorganic ion transport and metabolism	PTHR43423:SF2
T303_09160	beta-lactamase	not assigned	not assigned	not assigned	COG1680	V	Defense mechanisms	PTHR43645:SF4
T303_09165	C3-degrading proteinase	not assigned	not assigned	not assigned	not assigned	not assigned	not assigned	PTHR43279:SF1
T303_09170	CAAX amino terminal protease	K07052	K07052	uncharacterized protein	not assigned	not assigned	not assigned	PTHR43592
T303_09175	glycerol uptake permease	K02440	GLPF	glycerol uptake facilitator protein	COG0580	G	Carbohydrate transport and metabolism	PTHR43829:SF9
T303_09180	X-prolyl-dipeptidyl aminopeptidase	K01281	pepX	X-Pro dipeptidyl-peptidase [EC:3.4.14.11]	COG2936	R	General function prediction only	NOHIT
T303_09185	putative bacteriocin self-immunity protein	not assigned	not assigned	not assigned	not assigned	not assigned	not assigned	NOHIT
T303_09195	peptidase	not assigned	not assigned	not assigned	not assigned	not assigned	not assigned	NOHIT
T303_09205	transposase IS3	not assigned	not assigned	not assigned	COG2963	X	Mobilome - prophages, transposons	PTHR33795:SF1
T303_09210	transposase IS3	not assigned	not assigned	not assigned	COG2801	X	Mobilome - prophages, transposons	PTHR42648:SF3
T303_09220	pore-forming peptide bacteriocin	not assigned	not assigned	not assigned	not assigned	not assigned	not assigned	NOHIT
T303_09225	hypothetical protein	not assigned	not assigned	not assigned	not assigned	not assigned	not assigned	NOHIT
T303_09230	membrane protein	not assigned	not assigned	not assigned	not assigned	not assigned	not assigned	NOHIT
T303_09235	membrane protein	not assigned	not assigned	not assigned	not assigned	not assigned	not assigned	NOHIT
T303_09240	hypothetical protein	not assigned	not assigned	not assigned	not assigned	not assigned	not assigned	NOHIT
T303_09245	bacteriocin	not assigned	not assigned	not assigned	not assigned	not assigned	not assigned	NOHIT
T303_09250	bacteriocin BlpI family protein	not assigned	not assigned	not assigned	not assigned	not assigned	not assigned	NOHIT
T303_09255	bacteriocin	not assigned	not assigned	not assigned	not assigned	not assigned	not assigned	NOHIT
T303_09260	response regulator-like protein	K07707	agrA, blpR, fsrA	two-component system, LytTR family, response regulatorAgrA	COG3279	T,K	Signal transduction mechanisms	PTHR43412:SF3
T303_09265	sensor histidine kinase	K07706	agrC, blpH, fsrC	two-component system, LytTR family, sensor histidine kinase AgrC [EC:2.7.13.3]	COG2972	T	Signal transduction mechanisms	PTHR40448:SF1
T303_09270	signal peptidase	K20343	blpC	peptide pheromone BlpC	not assigned	not assigned	not assigned	NOHIT
T303_09275	lactococcin A ABC transporter permease	K20345	blpB	membrane fusion protein, peptide pheromone/bacteriocin exporter	not assigned	not assigned	not assigned	PTHR30386:SF0
T303_09285	hypothetical protein	not assigned	not assigned	not assigned	not assigned	not assigned	not assigned	NOHIT
T303_09290	hypothetical protein	not assigned	not assigned	not assigned	not assigned	not assigned	not assigned	NOHIT
T303_09295	multidrug ABC transporter ATP-binding protein	K18890	mdlB, smdB	ATP-binding cassette, subfamily B, multidrug efflux pump	COG1132	V	Defense mechanisms	PTHR24221:SF430
T303_09300	multidrug ABC transporter ATP-binding protein	K18889	mdlA, smdA	ATP-binding cassette, subfamily B, multidrug efflux pump	COG1132	V	Defense mechanisms	PTHR24221:SF300
T303_09310	glycopeptide antibiotics resistance protein	not assigned	not assigned	not assigned	not assigned	not assigned	not assigned	PTHR36834:SF1
T303_09315	23S rRNA methyltransferase	K06941	rlmN	23S rRNA (adenine2503-C2)-methyltransferase [EC:2.1.1.192]	COG0820	J	Translation, ribosomal structure and biogenesis	PTHR30544
T303_09320	transcriptional regulator	not assigned	not assigned	not assigned	COG4470	S	Function unknown	NOHIT
T303_09325	phosphoesterase	not assigned	not assigned	not assigned	COG0737	F,V	Nucleotide transport and metabolism	PTHR11575:SF23
T303_09335	DEAD/DEAH box helicase	K18692	cshB	ATP-dependent RNA helicase CshB [EC:3.6.4.13]	COG0513	L	Replication, recombination and repair	PTHR24031:SF586
T303_09340	phospho-N-acetylmuramoyl-pentapeptide-transferase	K01000	mraY	phospho-N-acetylmuramoyl-pentapeptide-transferase [EC:2.7.8.13]	COG0472	M	Cell wall/membrane/envelope biogenesis	PTHR22926:SF5
T303_09345	penicillin-binding protein 2X	K12556	pbp2X	penicillin-binding protein 2X	COG0768	M,D	Cell wall/membrane/envelope biogenesis	PTHR30627:SF1
T303_09350	cell division protein FtsL	not assigned	not assigned	not assigned	COG4839	D	Cell cycle control, cell division, chromosome partitioning	PTHR40027:SF1
T303_09355	16S rRNA methyltransferase	K03438	mraW, rsmH	16S rRNA (cytosine1402-N4)-methyltransferase [EC:2.1.1.199]	COG0275	J	Translation, ribosomal structure and biogenesis	PTHR11265
T303_09365	hypothetical protein	not assigned	not assigned	not assigned	not assigned	not assigned	not assigned	NOHIT
T303_09370	hypothetical protein	not assigned	not assigned	not assigned	COG3152	S	Function unknown	PTHR34980:SF2
T303_09375	membrane protein	not assigned	not assigned	not assigned	not assigned	not assigned	not assigned	NOHIT
T303_09380	gamma-glutamyl phosphate reductase	K00147	proA	glutamate-5-semialdehyde dehydrogenase [EC:1.2.1.41]	COG0014	E	Amino acid transport and metabolism	PTHR11063:SF8
T303_09385	gamma-glutamyl kinase	K00931	proB	glutamate 5-kinase [EC:2.7.2.11]	COG0263	E	Amino acid transport and metabolism	PTHR43654:SF3
T303_09390	ABC transporter permease	K01992	ABC-2.P	ABC-2 type transport system permease protein	not assigned	not assigned	not assigned	NOHIT
T303_09395	3-dehydroquinate dehydratase	K01990	ABC-2.A	ABC-2 type transport system ATP-binding protein	COG1131	V	Defense mechanisms	PTHR42939
T303_09400	integral membrane protein	K07150	K07150	uncharacterized protein	COG1811	S	Function unknown	PTHR36111:SF2
T303_09405	ATP-dependent helicase	K16898	addA	ATP-dependent helicase/nuclease subunit A [EC:3.1.-.- 3.6.4.12]	COG1074	L	Replication, recombination and repair	PTHR11070:SF48
T303_09410	ATP-dependent helicase	K16899	addB	ATP-dependent helicase/nuclease subunit B [EC:3.1.-.- 3.6.4.12]	COG3857	L	Replication, recombination and repair	PTHR30591:SF1
T303_09415	hypothetical protein	not assigned	not assigned	not assigned	not assigned	not assigned	not assigned	NOHIT
T303_09420	DNA-binding protein	not assigned	not assigned	not assigned	not assigned	not assigned	not assigned	PTHR37299:SF1
T303_09425	membrane protein	not assigned	not assigned	not assigned	not assigned	not assigned	not assigned	NOHIT
T303_09430	hypothetical protein	not assigned	not assigned	not assigned	not assigned	not assigned	not assigned	NOHIT
T303_09435	hisitidine kinase	not assigned	not assigned	not assigned	not assigned	not assigned	not assigned	NOHIT
T303_09445	haloacid dehalogenase	not assigned	not assigned	not assigned	COG4696	R	General function prediction only	PTHR10000:SF25
T303_09450	asparaginase	K01424	E3.5.1.1, ansA, ansB	L-asparaginase [EC:3.5.1.1]	COG0252	U,J	Intracellular trafficking, secretion, and vesicular transport	PTHR43828:SF3
T303_09455	hypothetical protein	not assigned	not assigned	not assigned	not assigned	not assigned	not assigned	NOHIT
T303_09460	ATP-dependent DNA helicase	K03655	recG	ATP-dependent DNA helicase RecG [EC:3.6.4.12]	COG1200	L	Replication, recombination and repair	PTHR24031:SF249
T303_09465	alanine racemase	K01775	alr	alanine racemase [EC:5.1.1.1]	COG0787	M	Cell wall/membrane/envelope biogenesis	PTHR30511:SF0
T303_09470	4'-phosphopantetheinyl transferase	K00997	acpS	holo-[acyl-carrier protein] synthase [EC:2.7.8.7]	COG0736	I	Lipid transport and metabolism	PTHR12215:SF15
T303_09475	phospho-2-dehydro-3-deoxyheptonate aldolase	K01626	E2.5.1.54, aroF, aroG, aroH	3-deoxy-7-phosphoheptulonate synthase [EC:2.5.1.54]	COG0722	E	Amino acid transport and metabolism	PTHR21225:SF10
T303_09480	phospho-2-dehydro-3-deoxyheptonate aldolase	K01626	E2.5.1.54, aroF, aroG, aroH	3-deoxy-7-phosphoheptulonate synthase [EC:2.5.1.54]	COG0722	E	Amino acid transport and metabolism	PTHR21225:SF10
T303_09485	preprotein translocase subunit SecA	K03070	secA	preprotein translocase subunit SecA	COG0653	U	Intracellular trafficking, secretion, and vesicular transport	PTHR30612
T303_09495	mannose-6-phosphate isomerase	K01809	manA, MPI	mannose-6-phosphate isomerase [EC:5.3.1.8]	COG1482	G	Carbohydrate transport and metabolism	PTHR42742:SF3
T303_09500	fructokinase	K00847	E2.7.1.4, scrK	fructokinase [EC:2.7.1.4]	COG1940	G,K	Carbohydrate transport and metabolism	PTHR42742:SF5
T303_09505	PTS sucrose transporter subunit IIABC	K02808	PTS-Scr-EIIA, scrA, ptsS	PTS system, sucrose-specific IIA component [EC:2.7.1.211]	COG1263	G	Carbohydrate transport and metabolism	PTHR30175:SF7
T303_09510	sucrose-6-phosphate hydrolase	K01193	INV, sacA	beta-fructofuranosidase [EC:3.2.1.26]	COG1621	G	Carbohydrate transport and metabolism	PTHR43101:SF1
T303_09515	sucrose operon repressor	K03484	scrR	LacI family transcriptional regulator, sucrose operon repressor	COG1609	K	Transcription	PTHR30146:SF95
T303_09520	transcription antitermination factor NusB	K03625	nusB	N utilization substance protein B	COG0781	K	Transcription	PTHR11078:SF3
T303_09525	hypothetical protein	not assigned	not assigned	not assigned	COG1302	S	Function unknown	PTHR34297:SF1
T303_09530	elongation factor P	K02356	efp	elongation factor P	COG0231	J	Translation, ribosomal structure and biogenesis	PTHR30053:SF1
T303_09535	CMP deaminase	K01493	comEB	dCMP deaminase [EC:3.5.4.12]	COG2131	F	Nucleotide transport and metabolism	PTHR11086:SF18
T303_09540	X-Pro aminopeptidase	K01262	pepP	Xaa-Pro aminopeptidase [EC:3.4.11.9]	COG0006	E	Amino acid transport and metabolism	PTHR46112:SF3
T303_09545	membrane protein	not assigned	not assigned	not assigned	not assigned	not assigned	not assigned	NOHIT
T303_09555	hypothetical protein	not assigned	not assigned	not assigned	not assigned	not assigned	not assigned	NOHIT
T303_09560	membrane protein	not assigned	not assigned	not assigned	not assigned	not assigned	not assigned	NOHIT
T303_09565	excinuclease ABC subunit A	K03701	uvrA	excinuclease ABC subunit A	COG0178	L	Replication, recombination and repair	PTHR43152:SF4
T303_09570	magnesium transporter	K03284	corA	magnesium transporter	COG0598	P	Inorganic ion transport and metabolism	PTHR47891:SF2
T303_09575	membrane protein	not assigned	not assigned	not assigned	COG4858	S	Function unknown	NOHIT
T303_09580	hypothetical protein	not assigned	not assigned	not assigned	not assigned	not assigned	not assigned	NOHIT
T303_09585	30S ribosomal protein S18	K02963	RP-S18, MRPS18, rpsR	small subunit ribosomal protein S18	COG0238	J	Translation, ribosomal structure and biogenesis	PTHR13479:SF40
T303_09590	single-stranded DNA-binding protein	K03111	ssb	single-strand DNA-binding protein	COG0629	L	Replication, recombination and repair	PTHR10302:SF10
T303_09595	30S ribosomal protein S6	K02990	RP-S6, MRPS6, rpsF	small subunit ribosomal protein S6	COG0360	J	Translation, ribosomal structure and biogenesis	PTHR21011:SF1
T303_09600	hypothetical protein	not assigned	not assigned	not assigned	not assigned	not assigned	not assigned	NOHIT
T303_09605	adenine glycosylase	K03575	mutY	A/G-specific adenine glycosylase [EC:3.2.2.31]	COG1194	L	Replication, recombination and repair	PTHR42944:SF3
T303_09610	hypothetical protein	not assigned	not assigned	not assigned	not assigned	not assigned	not assigned	NOHIT
T303_09615	hypothetical protein	not assigned	not assigned	not assigned	not assigned	not assigned	not assigned	NOHIT
T303_09620	hypothetical protein	not assigned	not assigned	not assigned	not assigned	not assigned	not assigned	NOHIT
T303_09625	hypothetical protein	not assigned	not assigned	not assigned	not assigned	not assigned	not assigned	NOHIT
T303_09630	hypothetical protein	not assigned	not assigned	not assigned	not assigned	not assigned	not assigned	NOHIT
T303_09635	DNA polymerase I	K02335	polA	DNA polymerase I [EC:2.7.7.7]	COG0749	L	Replication, recombination and repair	PTHR10133:SF27
T303_09640	DNA mismatch repair protein MutS	K07456	mutS2	DNA mismatch repair protein MutS2	COG1193	L	Replication, recombination and repair	PTHR11361:SF14
T303_09645	membrane ancor connecting MutS2 with cell-division Z-ring	not assigned	not assigned	not assigned	COG1286	S	Function unknown	PTHR37306:SF1
T303_09650	hypothetical protein	not assigned	not assigned	not assigned	not assigned	not assigned	not assigned	NOHIT
T303_09655	ribonuclease HIII	K03471	rnhC	ribonuclease HIII [EC:3.1.26.4]	COG1039	L	Replication, recombination and repair	PTHR10954:SF12
T303_09660	signal peptidase	K03100	lepB	signal peptidase I [EC:3.4.21.89]	not assigned	not assigned	not assigned	PTHR43390:SF1
T303_09665	ATP-dependent DNA helicase, RecD/TraA family	K03581	recD	exodeoxyribonuclease V alpha subunit [EC:3.1.11.5]	COG0507	L	Replication, recombination and repair	PTHR43788:SF6
T303_09670	branched-chain amino acid transporter	not assigned	not assigned	not assigned	COG4392	E	Amino acid transport and metabolism	NOHIT
T303_09675	branched-chain amino acid ABC transporter permease	not assigned	not assigned	not assigned	COG1296	E	Amino acid transport and metabolism	PTHR34979:SF1
T303_09680	glycoprotease family protein	K01409	KAE1, tsaD, QRI7	N6-L-threonylcarbamoyladenine synthase [EC:2.3.1.234]	COG0533	J	Translation, ribosomal structure and biogenesis	PTHR11735:SF6
T303_09685	alanine acetyltransferase	K03789	rimI	[ribosomal protein S18]-alanine N-acetyltransferase [EC:2.3.1.266]	COG0456	J	Translation, ribosomal structure and biogenesis	PTHR43420:SF16
T303_09690	inactive metal-dependent protease-like protein, putative molecular chaperone	not assigned	not assigned	not assigned	COG1214	J	Translation, ribosomal structure and biogenesis	PTHR11735:SF11
T303_09695	hypothetical protein	not assigned	not assigned	not assigned	COG5503	K,V	Transcription	NOHIT
T303_09700	mRNA degradation ribonuclease J1/J2, metallo-beta-lactamase superfamily enzyme	K12574	rnj	ribonuclease J [EC:3.1.-.-]	COG0595	J	Translation, ribosomal structure and biogenesis	PTHR43694:SF4
T303_09705	hydrolase	not assigned	not assigned	not assigned	not assigned	not assigned	not assigned	NOHIT
T303_09710	glutamine synthetase	K01915	glnA, GLUL	glutamine synthetase [EC:6.3.1.2]	COG0174	E	Amino acid transport and metabolism	PTHR43785:SF1
T303_09715	repressor of the glutamine synthetase, MerR family transcriptional regulator	K03713	glnR	MerR family transcriptional regulator, glutamine synthetase repressor	COG0789	K	Transcription	PTHR30204:SF65
T303_09720	membrane protein	not assigned	not assigned	not assigned	not assigned	not assigned	not assigned	PTHR30509:SF9
T303_09725	transposase	not assigned	not assigned	not assigned	not assigned	not assigned	not assigned	NOHIT
T303_09735	phosphoglycerate kinase	K00927	PGK, pgk	phosphoglycerate kinase [EC:2.7.2.3]	COG0126	G	Carbohydrate transport and metabolism	PTHR11406:SF23
T303_09740	transposase	K07491	K07491	putative transposase	not assigned	not assigned	not assigned	PTHR33360
T303_09750	transposase IS861	K07497	K07497	putative transposase	not assigned	not assigned	not assigned	PTHR42648:SF3
T303_09755	transposase	K07497	K07497	putative transposase	not assigned	not assigned	not assigned	PTHR42648:SF3
T303_09765	glyceraldehyde-3-phosphate dehydrogenase	K00134	GAPDH, gapA	glyceraldehyde 3-phosphate dehydrogenase [EC:1.2.1.12]	COG0057	G	Carbohydrate transport and metabolism	PTHR43148:SF6
T303_09770	elongation factor P	K02355	fusA, GFM, EFG	elongation factor G	COG0480	J	Translation, ribosomal structure and biogenesis	PTHR43261
T303_09775	30S ribosomal protein S7	K02992	RP-S7, MRPS7, rpsG	small subunit ribosomal protein S7	COG0049	J	Translation, ribosomal structure and biogenesis	PTHR11205:SF19
T303_09780	30S ribosomal protein S12	K02950	RP-S12, MRPS12, rpsL	small subunit ribosomal protein S12	COG0048	J	Translation, ribosomal structure and biogenesis	PTHR11652:SF1
T303_09785	purine operon repressor	K09685	purR	purine operon repressor	COG0503	F	Nucleotide transport and metabolism	PTHR43864:SF2
T303_09790	3'-5' exoribonuclease	K03698	cbf, cbf1	3'-5' exoribonuclease [EC:3.1.-.-]	COG3481	J	Translation, ribosomal structure and biogenesis	PTHR37294:SF1
T303_09795	DNA polymerase V	K09760	rmuC	DNA recombination protein RmuC	COG1322	L	Replication, recombination and repair	PTHR30563:SF0
T303_09800	thiamine pyrophosphokinase	K00949	thiN, TPK1, THI80	thiamine pyrophosphokinase [EC:2.7.6.2]	COG1564	H	Coenzyme transport and metabolism	PTHR41299:SF1
T303_09805	ribulose-phosphate 3-epimerase	K01783	rpe, RPE	ribulose-phosphate 3-epimerase [EC:5.1.3.1]	COG0036	G	Carbohydrate transport and metabolism	PTHR11749:SF7
T303_09810	GTPase A	K06949	rsgA, engC	ribosome biogenesis GTPase / thiamine phosphate phosphatase [EC:3.6.1.- 3.1.3.100]	COG1162	J	Translation, ribosomal structure and biogenesis	PTHR32120:SF9
T303_09815	tRNA Leu	K14228	tRNA-Leu	tRNA Leu	not assigned	not assigned	not assigned	NOHIT
T303_09820	16S rRNA methyltransferase	K02528	ksgA	16S rRNA (adenine1518-N6/adenine1519-N6)-dimethyltransferase [EC:2.1.1.182]	COG0030	J	Translation, ribosomal structure and biogenesis	PTHR11727:SF7
T303_09825	DNA primase	K05985	rnmV	ribonuclease M5 [EC:3.1.26.8]	COG1658	J	Translation, ribosomal structure and biogenesis	PTHR39156:SF1
T303_09830	TatD family hydrolase	K03424	tatD	TatD DNase family protein [EC:3.1.21.-]	COG0084	N	Cell motility	PTHR46124:SF2
T303_09835	CoA-binding protein	K06929	K06929	uncharacterized protein	COG1832	R	General function prediction only	PTHR33303
T303_09840	thioredoxin	K03671	trxA	thioredoxin 1	not assigned	not assigned	not assigned	PTHR45663:SF7
T303_09845	Appr-1-p processing protein	not assigned	not assigned	not assigned	COG2110	J	Translation, ribosomal structure and biogenesis	PTHR11106
T303_09855	bacteriocin transport accessory protein	not assigned	not assigned	not assigned	COG0526	O	Posttranslational modification, protein turnover, chaperones	PTHR10438:SF301
T303_09860	tRNA Asn	K14220	tRNA-Asn	tRNA Asn	not assigned	not assigned	not assigned	NOHIT
T303_09865	5S ribosomal RNA	K01985	5SrRNA, rrf	5S ribosomal RNA	not assigned	not assigned	not assigned	NOHIT
T303_09870	23S ribosomal RNA	K01980	23SrRNA, rrl	23S ribosomal RNA	not assigned	not assigned	not assigned	NOHIT
T303_09875	tRNA Ala	K14218	tRNA-Ala	tRNA Ala	not assigned	not assigned	not assigned	NOHIT
T303_09880	16S ribosomal RNA	K01977	16SrRNA, rrs	16S ribosomal RNA	not assigned	not assigned	not assigned	NOHIT
T303_09885	hypothetical protein	not assigned	not assigned	not assigned	not assigned	not assigned	not assigned	NOHIT
T303_09890	queuine tRNA-ribosyltransferase	K00773	tgt, QTRT1	queuine tRNA-ribosyltransferase [EC:2.4.2.29]	COG0343	J	Translation, ribosomal structure and biogenesis	PTHR46499:SF1
T303_09895	transposase IS200	K07491	K07491	putative transposase	not assigned	not assigned	not assigned	PTHR33360:SF2
T303_09900	50S ribosomal protein L34	K02914	RP-L34, MRPL34, rpmH	large subunit ribosomal protein L34	not assigned	not assigned	not assigned	PTHR14503:SF4
T303_09905	transposase IS1193	not assigned	not assigned	not assigned	COG3464	X	Mobilome - prophages, transposons	PTHR33498:SF1

## Sheet: Cd2 vs Cd1
Locus_tag	Fold change	Log2 fold-change	p-value	q-value (adjusted p-value)	DEGs (based on q-value)	Detected in Proteome	Proteome_Log2_FCmedian
T303_01945	0.116452	-3.10219	7.74485e-06	0.00366029	Down	Yes	-1.02805
T303_02630	3.45143	1.7872	1.71841e-05	0.00366029	Up	Yes	1.95601
T303_03440	13.4352	3.74795	7.51904e-06	0.00366029	Up	Yes	1.82185
T303_03435	13.6205	3.76771	3.67924e-05	0.0044729	Up	Yes	1.27242
T303_08595	0.411718	-1.28027	5.41796e-05	0.00485335	Down	Yes	0.0713894
T303_08475	0.29307	-1.77069	5.74858e-05	0.00489204	Down	Yes	0.451843
T303_05965	2.39468	1.25983	9.98092e-05	0.00687509	Up	Yes	0.154047
T303_09095	3.55723	1.83075	9.58322e-05	0.00687509	Up	Yes	-0.186028
T303_02635	2.83203	1.50183	0.000139738	0.00774704	Up	Yes	-0.0768852
T303_03630	2.13939	1.0972	0.000149504	0.00774704	Up	Yes	-0.0837863
T303_08465	0.304047	-1.71764	0.000143457	0.00774704	Down	Yes	-0.661489
T303_01040	0.259485	-1.94628	0.000174585	0.00825398	Down	Yes	-1.24605
T303_07855	0.455382	-1.13485	0.000172568	0.00825398	Down	Yes	0.556956
T303_01335	0.217248	-2.20258	0.000188832	0.00826599	Down	Yes	-1.48816
T303_08905	6.18425	2.6286	0.000189409	0.00826599	Up	Yes	0.578765
T303_01310	0.365727	-1.45116	0.00025909	0.00867992	Down	Yes	0.199407
T303_01475	0.394495	-1.34192	0.0002518	0.00867992	Down	Yes	-0.0655277
T303_02155	2.10557	1.07421	0.000217503	0.00867992	Up	Yes	0.487586
T303_04430	4.15211	2.05385	0.00024688	0.00867992	Up	Yes	-2.96449
T303_05420	6.38602	2.67492	0.000255051	0.00867992	Up	Yes	2.08741
T303_08020	0.451321	-1.14777	0.000230575	0.00867992	Down	Yes	-0.0599903
T303_03485	2.46904	1.30395	0.00029516	0.009303	Up	Yes	-0.0337602
T303_04170	26.5947	4.73307	0.000300867	0.00931047	Up	Yes	2.11595
T303_03430	11.4017	3.51118	0.000322547	0.00946508	Up	Yes	1.5394
T303_08455	0.411322	-1.28166	0.000318395	0.00946508	Down	Yes	-0.375392
T303_09840	3.54799	1.827	0.000316567	0.00946508	Up	Yes	3.70407
T303_00020	15.9621	3.99658	0.000335602	0.00957606	Up	Yes	-0.201148
T303_03635	2.27429	1.18542	0.00035446	0.00957606	Up	Yes	0.000436727
T303_04425	4.05469	2.01959	0.000351677	0.00957606	Up	Yes	-2.47145
T303_05255	0.449198	-1.15458	0.00034842	0.00957606	Down	Yes	-0.464091
T303_01330	0.250977	-1.99437	0.000474281	0.0109642	Down	Yes	-0.866161
T303_08290	5.98826	2.58214	0.000457534	0.0109642	Up	Yes	1.30652
T303_05425	7.59607	2.92525	0.000534956	0.0109947	Up	Yes	2.85961
T303_06070	3.72721	1.8981	0.000516085	0.0109947	Up	Yes	0.671779
T303_09715	0.306507	-1.70601	0.000536171	0.0109947	Down	Yes	-1.75644
T303_01085	0.431902	-1.21122	0.000569336	0.0114001	Down	Yes	0.42061
T303_07110	0.519392	-0.945105	0.00060808	0.011896	Down	Yes	0.0707322
T303_00780	2.74175	1.4551	0.000623687	0.0119948	Up	Yes	1.29265
T303_03660	0.475419	-1.07273	0.000771273	0.0129971	Down	Yes	-0.201394
T303_03425	10.7176	3.42191	0.000952046	0.0150035	Up	Yes	1.99982
T303_00055	0.48131	-1.05496	0.00106905	0.0158528	Down	Yes	0.412011
T303_00140	0.473181	-1.07954	0.00107114	0.0158528	Down	Yes	0.193054
T303_09105	2.16447	1.11401	0.00111759	0.0159844	Up	Yes	2.1177
T303_03640	2.01424	1.01024	0.00138052	0.0182143	Up	Yes	-0.0353835
T303_07300	3.25589	1.70305	0.00143866	0.01855	Up	Yes	0.571372
T303_05660	0.562569	-0.829898	0.001535	0.0187954	Down	Yes	0.583531
T303_09475	0.575507	-0.797095	0.00154615	0.0187968	Down	Yes	0.682624
T303_06890	0.495287	-1.01366	0.00168113	0.0194645	Down	Yes	1.98673
T303_09710	0.264294	-1.91978	0.00167034	0.0194645	Down	Yes	-1.23276
T303_04185	3.43856	1.78181	0.00174832	0.0198845	Up	Yes	0.0576304
T303_09525	1.79784	0.846263	0.00174604	0.0198845	Up	Yes	0.537065
T303_04565	0.580588	-0.784413	0.00196004	0.0213845	Down	Yes	-0.0939617
T303_03390	2.00897	1.00646	0.00198204	0.0214868	Up	Yes	0.199377
T303_02225	0.539437	-0.890474	0.00212839	0.0216584	Down	Yes	0.119834
T303_02655	2.55964	1.35594	0.00208134	0.0216584	Up	Yes	2.46657
T303_03025	0.529203	-0.918107	0.00211407	0.0216584	Down	Yes	0.978497
T303_08300	21.3305	4.41485	0.00225049	0.0222694	Up	Yes	0.818045
T303_03050	0.461	-1.11716	0.00229964	0.0223752	Down	Yes	-0.903503
T303_05330	0.40179	-1.31549	0.00234901	0.022716	Down	Yes	-0.404849
T303_03080	0.478584	-1.06315	0.00251474	0.0233034	Down	Yes	-1.28151
T303_06515	3.3919	1.76209	0.00244231	0.0233034	Up	Yes	0.168681
T303_07385	0.6156	-0.699934	0.00252367	0.0233034	Down	Yes	0.564195
T303_08720	3.22736	1.69035	0.00253188	0.0233034	Up	Yes	0.857073
T303_03130	0.445957	-1.16502	0.00255978	0.0234233	Down	Yes	-1.64065
T303_09085	2.35724	1.2371	0.00270968	0.024146	Up	Yes	1.24721
T303_01940	1.74151	0.800337	0.00295568	0.0259307	Up	Yes	0.350431
T303_03260	0.354575	-1.49584	0.00304318	0.0262456	Down	Yes	-1.36063
T303_00465	0.476536	-1.06934	0.00312043	0.0265549	Down	Yes	-0.840462
T303_09480	0.545613	-0.87405	0.00339193	0.0284388	Down	Yes	0.463119
T303_07165	0.56955	-0.812105	0.00347966	0.0290312	Down	Yes	-0.732151
T303_06620	0.624666	-0.678844	0.00351824	0.0290682	Down	Yes	0.0513177
T303_01340	0.199574	-2.325	0.00356888	0.0291798	Down	Yes	-0.654302
T303_07180	0.560423	-0.835411	0.0036465	0.0294139	Down	Yes	-0.327868
T303_00290	0.332227	-1.58976	0.00382273	0.0305459	Down	Yes	-1.48935
T303_02960	2.64567	1.40364	0.00386247	0.0307193	Up	Yes	1.33555
T303_08160	0.62205	-0.684898	0.00414643	0.0322248	Down	Yes	-0.111707
T303_08935	2.13493	1.09419	0.00418427	0.0323473	Up	Yes	0.300824
T303_01355	0.236615	-2.07939	0.00427752	0.0327943	Down	Yes	-1.47439
T303_06510	2.96695	1.56898	0.00431347	0.0329216	Up	Yes	0.189925
T303_03820	2.04197	1.02996	0.00449697	0.0338666	Up	Yes	1.17152
T303_00030	0.585934	-0.77119	0.00457262	0.0339852	Down	Yes	-0.49754
T303_07275	0.16105	-2.63442	0.00456549	0.0339852	Down	Yes	-0.664324
T303_08960	0.592302	-0.755595	0.00454977	0.0339852	Down	Yes	-0.0963497
T303_01150	1.51819	0.602348	0.00470005	0.0343888	Up	Yes	0.484541
T303_01345	0.195305	-2.3562	0.00470593	0.0343888	Down	Yes	-1.80658
T303_08040	0.630333	-0.665813	0.00470775	0.0343888	Down	Yes	0.485017
T303_01350	0.22326	-2.1632	0.00475081	0.034555	Down	Yes	-0.136082
T303_01970	0.523635	-0.933367	0.00492282	0.0355027	Down	Yes	0.406023
T303_02375	2.06174	1.04386	0.00516449	0.0364842	Up	Yes	0.871167
T303_01815	0.377426	-1.40573	0.0057647	0.0402111	Down	Yes	0.00730572
T303_02205	0.49783	-1.00628	0.00617387	0.0421912	Down	Yes	0.638361
T303_07160	0.608876	-0.71578	0.00666067	0.0446317	Down	Yes	0.0576304
T303_09530	0.622175	-0.684607	0.00672984	0.0447429	Down	Yes	-0.153269
T303_00295	0.344047	-1.53932	0.00688989	0.0456288	Down	Yes	-1.21013
T303_00300	0.410521	-1.28447	0.00707427	0.0464881	Down	Yes	-0.21332
T303_04175	1.9314	0.94965	0.00722232	0.0470973	Up	Yes	0.296243
T303_01155	1.75838	0.81425	0.00781668	0.0490922	Up	Yes	0.750296
T303_02660	3.11322	1.63841	0.00807786	0.0500604	No	Yes	0.296226
T303_04005	1.82984	0.871716	0.0082817	0.0508861	No	Yes	0.158125
T303_02930	1.76939	0.823251	0.00853857	0.0519023	No	Yes	1.09928
T303_06885	0.586285	-0.770326	0.00890242	0.0538124	No	Yes	-0.488649
T303_02845	2.18759	1.12934	0.00898799	0.054055	No	Yes	-0.503499
T303_01050	0.597304	-0.743464	0.00913267	0.0547317	No	Yes	-0.160581
T303_00100	0.670932	-0.575762	0.00937559	0.0559904	No	Yes	-0.0929222
T303_02200	0.556157	-0.846435	0.0104512	0.0605034	No	Yes	-0.199072
T303_04265	0.568905	-0.813741	0.010906	0.06269	No	Yes	-0.390137
T303_08305	14.5154	3.85951	0.0111646	0.0635525	No	Yes	-0.0992755
T303_07930	0.613864	-0.704009	0.01197	0.0661459	No	Yes	1.00049
T303_05650	0.668258	-0.581522	0.0120662	0.0662476	No	Yes	0.114184
T303_00755	0.348806	-1.5195	0.0126179	0.0688298	No	Yes	0.337749
T303_04110	0.698809	-0.51703	0.013185	0.0701275	No	Yes	2.00797
T303_00025	11.8769	3.57008	0.013298	0.0702894	No	Yes	-0.100191
T303_00655	1.51254	0.59697	0.0132669	0.0702894	No	Yes	0.2539
T303_00950	0.580122	-0.785571	0.0135452	0.0709353	No	Yes	-0.112563
T303_08350	0.626438	-0.674756	0.0138086	0.0718723	No	Yes	0.100273
T303_01380	0.41008	-1.28602	0.0141066	0.0729272	No	Yes	-0.850169
T303_08245	0.703902	-0.506553	0.0142565	0.0733069	No	Yes	-0.0502546
T303_05665	0.706737	-0.500754	0.0143999	0.0735994	No	Yes	-0.297123
T303_06505	2.55361	1.35254	0.0147727	0.0746089	No	Yes	-0.11806
T303_00105	0.658671	-0.602371	0.0149106	0.0746368	No	Yes	0.166479
T303_03100	0.541933	-0.883813	0.0149297	0.0746368	No	Yes	-0.0288023
T303_01035	0.533634	-0.906077	0.0152386	0.0753959	No	Yes	0.139659
T303_03785	2.18303	1.12633	0.015597	0.0756871	No	Yes	-0.358331
T303_04605	1.52128	0.605288	0.015402	0.0756871	No	Yes	-0.819513
T303_07345	0.557837	-0.842085	0.0157859	0.0756871	No	Yes	-0.185967
T303_05970	4.02031	2.00731	0.0164315	0.0779008	No	Yes	1.99427
T303_03780	2.29251	1.19693	0.0168931	0.0794254	No	Yes	-0.126096
T303_04315	0.532315	-0.909647	0.016861	0.0794254	No	Yes	0.159696
T303_01865	1.90966	0.933316	0.0174341	0.0806055	No	Yes	0.139326
T303_02670	2.95091	1.56116	0.0175841	0.0806055	No	Yes	-0.0943407
T303_02705	0.57561	-0.796837	0.0173739	0.0806055	No	Yes	-0.90897
T303_03095	0.539415	-0.890532	0.0174229	0.0806055	No	Yes	0.478794
T303_03120	0.573092	-0.803162	0.017453	0.0806055	No	Yes	-0.182115
T303_03710	0.714335	-0.485326	0.0174638	0.0806055	No	Yes	-0.415124
T303_04155	0.672616	-0.572145	0.0185313	0.0832196	No	Yes	0.186089
T303_06080	2.40018	1.26315	0.0193347	0.0852531	No	Yes	2.43843
T303_06625	0.687011	-0.541595	0.019828	0.0858707	No	Yes	0.125082
T303_02730	1.43262	0.518661	0.020463	0.0872885	No	Yes	-0.547767
T303_01405	0.468778	-1.09302	0.0212673	0.0878568	No	Yes	-1.43287
T303_02865	2.12078	1.08459	0.0215338	0.087957	No	Yes	0.268595
T303_03125	0.581303	-0.782637	0.02155	0.087957	No	Yes	-1.82375
T303_03065	0.422903	-1.2416	0.0217506	0.0885633	No	Yes	0.30883
T303_05590	0.689743	-0.535869	0.0224248	0.0902294	No	Yes	-0.524849
T303_02640	2.56624	1.35966	0.0225098	0.0903579	No	Yes	0.0973073
T303_08060	0.655431	-0.609485	0.023158	0.0925034	No	Yes	-0.191433
T303_09080	1.73525	0.795144	0.0232452	0.0925034	No	Yes	0.40529
T303_08195	0.626875	-0.67375	0.0243024	0.0950868	No	Yes	-0.445334
T303_03115	0.588339	-0.76528	0.025634	0.0982638	No	Yes	-0.819513
T303_09075	1.55801	0.639704	0.0270281	0.101947	No	Yes	0.301557
T303_02900	11.9374	3.57742	0.0278282	0.10364	No	Yes	-0.223192
T303_02895	11.5675	3.532	0.028596	0.105805	No	Yes	-0.347314
T303_04910	0.651461	-0.618249	0.0287891	0.106059	No	Yes	0.078598
T303_07355	0.63093	-0.664449	0.0291013	0.106517	No	Yes	-1.50448
T303_04380	0.717783	-0.47838	0.0292291	0.106755	No	Yes	0.181968
T303_03090	0.583131	-0.778109	0.0294074	0.107176	No	Yes	-0.470964
T303_01390	0.451929	-1.14583	0.02971	0.107818	No	Yes	0.0514252
T303_04795	0.715865	-0.482241	0.0300126	0.108684	No	Yes	1.16221
T303_03280	0.695783	-0.523291	0.0304136	0.109837	No	Yes	-0.15936
T303_09380	0.751248	-0.412639	0.0305594	0.109837	No	Yes	-0.0590452
T303_03085	0.531584	-0.91163	0.0317615	0.112387	No	Yes	0.072649
T303_08100	0.603839	-0.727763	0.031755	0.112387	No	Yes	0.523093
T303_08515	0.671792	-0.573913	0.0320881	0.11299	No	Yes	-0.743139
T303_09735	0.676714	-0.563381	0.0335627	0.116579	No	Yes	-0.307906
T303_04610	1.44349	0.52956	0.0342587	0.117795	No	Yes	-1.26477
T303_07155	0.665797	-0.586846	0.0344361	0.118166	No	Yes	-0.689848
T303_03075	0.505176	-0.985142	0.0345375	0.118275	No	Yes	0.421147
T303_00970	1.60325	0.681001	0.0351975	0.120052	No	Yes	1.21016
T303_04590	1.47792	0.563568	0.0361253	0.122469	No	Yes	0.270234
T303_08745	1.88436	0.914074	0.0367347	0.123076	No	Yes	1.50854
T303_03385	1.44	0.52607	0.0370145	0.123527	No	Yes	1.43261
T303_05130	11.0279	3.46309	0.0371995	0.123901	No	Yes	-1.50375
T303_08845	1.51838	0.602537	0.0376572	0.125022	No	Yes	-0.74191
T303_08750	1.91212	0.935174	0.0385397	0.12707	No	Yes	0.433701
T303_03520	0.693122	-0.528818	0.0393841	0.127923	No	Yes	-0.0553781
T303_04395	0.754617	-0.406183	0.0389733	0.127923	No	Yes	0.0601769
T303_04375	0.716716	-0.480527	0.0405595	0.130496	No	Yes	0.693717
T303_02810	7.45356	2.89793	0.0419463	0.133195	No	Yes	0.357236
T303_03530	0.715619	-0.482737	0.0427477	0.134984	No	Yes	0.0252483
T303_09660	0.717659	-0.478629	0.0439271	0.137816	No	Yes	0.259858
T303_01820	0.451538	-1.14708	0.0440553	0.137835	No	Yes	-1.50096
T303_03300	0.711481	-0.491103	0.0446799	0.138886	No	Yes	-0.518938
T303_08965	0.744987	-0.424713	0.0447178	0.138886	No	Yes	-0.185049
T303_06865	0.57762	-0.791807	0.0450396	0.139631	No	Yes	0.680166
T303_04230	0.614092	-0.703472	0.049196	0.148989	No	Yes	-0.356052
T303_03305	0.707283	-0.499641	0.049686	0.150205	No	Yes	-0.704966
T303_00125	1.54073	0.623613	0.0540409	0.159683	No	Yes	0.19744
T303_08970	0.713626	-0.48676	0.0544254	0.160263	No	Yes	-0.175945
T303_09335	0.739138	-0.436084	0.0546263	0.160577	No	Yes	0.178296
T303_00120	1.56074	0.642229	0.0559382	0.163305	No	Yes	-0.0393125
T303_03525	0.71567	-0.482634	0.056414	0.164412	No	Yes	0.650296
T303_08815	1.47116	0.556951	0.0566354	0.164775	No	Yes	-0.0180813
T303_05575	0.731156	-0.451749	0.0573726	0.166351	No	Yes	-0.274562
T303_05580	0.523533	-0.933649	0.0579928	0.167773	No	Yes	0.659486
T303_06060	0.716289	-0.481387	0.05806	0.167773	No	Yes	-0.477379
T303_03510	0.673195	-0.570904	0.0584994	0.168341	No	Yes	0.466504
T303_06840	0.700072	-0.514424	0.059722	0.170548	No	Yes	-0.521192
T303_08665	0.680344	-0.555664	0.0605046	0.172214	No	Yes	-1.2236
T303_03505	0.65321	-0.614381	0.0610325	0.173418	No	Yes	0.0574446
T303_05610	0.753718	-0.407904	0.0620552	0.175737	No	Yes	-0.229096
T303_00425	2.26792	1.18137	0.0626602	0.176277	No	Yes	-0.0032045
T303_06745	0.551834	-0.857693	0.0628407	0.176493	No	Yes	0.241815
T303_03580	0.501728	-0.995023	0.0650081	0.178746	No	Yes	-1.61745
T303_06055	0.631303	-0.663597	0.0655555	0.179671	No	Yes	-1.06842
T303_07270	0.609806	-0.713579	0.0699053	0.189457	No	Yes	0.207324
T303_03295	0.664335	-0.590016	0.070418	0.190543	No	Yes	-0.185783
T303_09445	0.710775	-0.492535	0.0726173	0.194944	No	Yes	-0.247987
T303_08270	1.36398	0.447827	0.0738263	0.196947	No	Yes	0.0732199
T303_03350	0.732985	-0.448145	0.0741648	0.197325	No	Yes	-0.36906
T303_06336	1.38005	0.46472	0.0746824	0.198013	No	Yes	-0.431468
T303_05990	1.51997	0.604039	0.0756863	0.200028	No	Yes	-0.0796651
T303_02860	1.64692	0.719774	0.0771141	0.202943	No	Yes	-0.689982
T303_04390	0.776847	-0.364298	0.0772237	0.202943	No	Yes	0.792666
T303_03235	0.777791	-0.362545	0.0784993	0.205232	No	Yes	-0.383023
T303_08535	0.757895	-0.399929	0.081606	0.211406	No	Yes	-0.630417
T303_03370	0.748721	-0.417499	0.083915	0.214772	No	Yes	-0.325411
T303_03515	0.684279	-0.547342	0.0853847	0.216494	No	Yes	1.03653
T303_08340	0.599204	-0.738881	0.085684	0.216693	No	Yes	-0.18747
T303_01935	0.704388	-0.505557	0.0876921	0.220191	No	Yes	-0.848212
T303_02295	1.30037	0.378921	0.0877143	0.220191	No	Yes	-0.444389
T303_06010	0.763355	-0.389574	0.0886944	0.221813	No	Yes	0.0840201
T303_00175	0.753965	-0.40743	0.0900945	0.224182	No	Yes	-0.633897
T303_00220	1.29636	0.374461	0.0942548	0.232039	No	Yes	-0.22583
T303_08250	0.784802	-0.3496	0.0943782	0.232039	No	Yes	0.324461
T303_06855	0.608673	-0.716261	0.0957084	0.233836	No	Yes	-1.05599
T303_04895	0.738614	-0.437108	0.0975775	0.237933	No	Yes	1.05017
T303_00005	0.708101	-0.497972	0.0997898	0.240527	No	Yes	-0.521556
T303_05520	0.419424	-1.25352	0.0999392	0.240527	No	Yes	-0.96751
T303_02380	1.3141	0.39407	0.100896	0.242208	No	Yes	-0.642604
T303_00625	1.70156	0.766858	0.103769	0.247496	No	Yes	-0.362723
T303_08425	1.42813	0.514131	0.104761	0.247774	No	Yes	0.114473
T303_05295	0.785847	-0.347679	0.10634	0.249641	No	Yes	-0.774747
T303_02915	0.775991	-0.365887	0.107274	0.251143	No	Yes	0.862295
T303_02910	0.797052	-0.327254	0.107477	0.251271	No	Yes	-0.224912
T303_00515	1.45066	0.536705	0.109092	0.252949	No	Yes	1.24071
T303_05725	0.797931	-0.325664	0.109888	0.253772	No	Yes	0.707462
T303_07285	0.404976	-1.30409	0.111428	0.256292	No	Yes	-0.837034
T303_04295	1.28457	0.361281	0.111905	0.256757	No	Yes	-0.0132265
T303_07210	1.26822	0.342802	0.1144	0.260655	No	Yes	0.295171
T303_02950	1.43336	0.519402	0.118861	0.267242	No	Yes	-0.212166
T303_09695	0.791259	-0.337778	0.11953	0.26839	No	Yes	0.0287772
T303_03955	0.792723	-0.335111	0.120199	0.268829	No	Yes	0.0593615
T303_06600	1.29243	0.370087	0.120175	0.268829	No	Yes	-0.0545929
T303_03920	1.64366	0.716915	0.120848	0.269573	No	Yes	2.80258
T303_05405	1.75969	0.815317	0.121924	0.27126	No	Yes	1.58148
T303_00885	1.71143	0.775205	0.124258	0.275075	No	Yes	4.1619
T303_09765	0.745871	-0.423002	0.124285	0.275075	No	Yes	0.351828
T303_06235	1.23694	0.306781	0.125861	0.27783	No	Yes	0.971437
T303_08165	0.822887	-0.281234	0.128088	0.28095	No	Yes	-1.70196
T303_04040	0.809106	-0.305599	0.129999	0.283725	No	Yes	0.101402
T303_09505	1.72136	0.783548	0.134325	0.290128	No	Yes	0.897535
T303_04665	1.25233	0.32461	0.134683	0.290166	No	Yes	-0.042834
T303_06650	0.738456	-0.437415	0.135718	0.291289	No	Yes	-0.435598
T303_00880	1.68621	0.75378	0.135914	0.291343	No	Yes	3.51291
T303_05900	1.43636	0.522421	0.136133	0.291445	No	Yes	0.273013
T303_08530	1.38609	0.471019	0.136802	0.291653	No	Yes	1.33616
T303_05515	0.412988	-1.27583	0.139405	0.295108	No	Yes	-1.50485
T303_04885	0.791703	-0.336969	0.140056	0.296008	No	Yes	0.387545
T303_07880	0.761147	-0.393753	0.144075	0.300879	No	Yes	0.297886
T303_01625	0.685094	-0.545625	0.145293	0.302679	No	Yes	-0.68485
T303_06660	0.692608	-0.529889	0.146376	0.303819	No	Yes	-1.37453
T303_09830	1.18535	0.245312	0.148302	0.307036	No	Yes	0.337685
T303_01300	0.732932	-0.448249	0.149627	0.308684	No	Yes	-0.896783
T303_02945	1.40911	0.494783	0.153547	0.314106	No	Yes	0.299356
T303_05160	0.726318	-0.461327	0.154729	0.316145	No	Yes	-0.81695
T303_01655	0.813087	-0.298518	0.155221	0.31677	No	Yes	0.0623787
T303_01735	0.69684	-0.5211	0.156786	0.318056	No	Yes	-0.622993
T303_04255	0.805316	-0.312373	0.158033	0.319651	No	Yes	0.160982
T303_06900	0.753887	-0.40758	0.159035	0.320708	No	Yes	0.530792
T303_08415	1.27247	0.347631	0.158975	0.320708	No	Yes	-0.10621
T303_06085	1.89819	0.924621	0.159684	0.320876	No	Yes	2.32215
T303_09485	0.793537	-0.33363	0.1607	0.32181	No	Yes	-0.294557
T303_00500	1.41821	0.50407	0.166895	0.328767	No	Yes	-0.371995
T303_04850	1.5311	0.614573	0.168571	0.33092	No	Yes	-0.701253
T303_00630	1.54395	0.626625	0.17084	0.333835	No	Yes	-0.524849
T303_00490	1.41434	0.500129	0.171224	0.3342	No	Yes	-0.10624
T303_06645	0.741239	-0.43199	0.171528	0.334411	No	Yes	0.284534
T303_07005	1.25216	0.324419	0.172321	0.334806	No	Yes	0.444943
T303_07195	0.826526	-0.274867	0.173219	0.336168	No	Yes	-0.221566
T303_00495	1.42423	0.510186	0.174763	0.338392	No	Yes	-0.418548
T303_02005	0.778881	-0.360526	0.176762	0.341099	No	Yes	0.439928
T303_09635	1.22079	0.28781	0.177748	0.342226	No	Yes	-0.0752465
T303_00535	1.5213	0.605309	0.18036	0.344914	No	Yes	0.82271
T303_08560	1.47187	0.557655	0.180256	0.344914	No	Yes	-0.274749
T303_00620	1.57738	0.657529	0.18219	0.347242	No	Yes	-0.268959
T303_01730	0.76349	-0.389318	0.182521	0.347483	No	Yes	-0.159208
T303_06690	0.841251	-0.249391	0.183562	0.348296	No	Yes	-0.170419
T303_01640	0.815495	-0.294253	0.18396	0.348664	No	Yes	-1.08727
T303_07865	0.614887	-0.701606	0.184992	0.35023	No	Yes	-0.404893
T303_00870	1.74462	0.802911	0.187146	0.353129	No	Yes	1.58912
T303_01900	1.63748	0.711479	0.192734	0.359291	No	Yes	1.37096
T303_03220	0.803542	-0.315555	0.196337	0.363619	No	Yes	0.154659
T303_02475	0.852868	-0.229606	0.198068	0.365631	No	Yes	-0.183186
T303_00505	1.36453	0.448409	0.199617	0.366851	No	Yes	-0.479486
T303_04400	0.832978	-0.26365	0.202858	0.368048	No	Yes	0.381405
T303_05955	1.39012	0.475212	0.202905	0.368048	No	Yes	-0.382347
T303_00350	1.19401	0.255816	0.203737	0.368895	No	Yes	-0.310214
T303_07635	0.53712	-0.896685	0.207504	0.373727	No	Yes	2.14812
T303_03205	1.25326	0.325687	0.21101	0.378439	No	Yes	0.136081
T303_01980	0.741097	-0.432265	0.212881	0.380992	No	Yes	-0.111582
T303_06455	0.733316	-0.447494	0.214893	0.382581	No	Yes	-0.838852
T303_08865	0.837256	-0.25626	0.217002	0.385057	No	Yes	-1.04124
T303_05015	1.22915	0.297664	0.217503	0.385213	No	Yes	0.613437
T303_05205	1.58202	0.66177	0.220493	0.389698	No	Yes	0.116254
T303_07885	0.764402	-0.387597	0.221792	0.391587	No	Yes	1.00336
T303_05350	0.792568	-0.335394	0.223748	0.393409	No	Yes	1.17179
T303_05225	0.683007	-0.550028	0.225756	0.394563	No	Yes	-0.603843
T303_08205	0.841168	-0.249534	0.22649	0.394966	No	Yes	-0.275129
T303_02395	0.811837	-0.300738	0.227542	0.396393	No	Yes	0.303157
T303_06655	0.747672	-0.419523	0.227953	0.396704	No	Yes	-0.211692
T303_06580	1.18574	0.245791	0.238263	0.410914	No	Yes	-1.27634
T303_07870	0.624261	-0.679778	0.242268	0.415694	No	Yes	-1.036
T303_08485	0.777178	-0.363682	0.243309	0.416611	No	Yes	0.918286
T303_02330	1.18085	0.239832	0.244728	0.417163	No	Yes	0.492082
T303_07890	0.710377	-0.493343	0.24414	0.417163	No	Yes	-0.121541
T303_06460	0.741656	-0.431178	0.245273	0.417455	No	Yes	-0.96212
T303_03180	1.18213	0.241389	0.246736	0.419106	No	Yes	0.268751
T303_06720	1.15961	0.213635	0.246702	0.419106	No	Yes	-0.681648
T303_03470	0.878114	-0.187519	0.256065	0.431508	No	Yes	0.452027
T303_07430	0.814878	-0.295344	0.257201	0.432993	No	Yes	-0.640037
T303_00940	0.788166	-0.343428	0.258086	0.434054	No	Yes	-0.23252
T303_04960	0.855692	-0.224837	0.259354	0.435756	No	Yes	0.033357
T303_02465	1.27006	0.344898	0.262937	0.440906	No	Yes	-0.0724679
T303_03545	0.818167	-0.289533	0.267741	0.446562	No	Yes	-0.834285
T303_00545	1.45994	0.545907	0.26955	0.447668	No	Yes	-0.385252
T303_09805	0.873193	-0.195628	0.272666	0.451104	No	Yes	-0.61842
T303_07305	1.25216	0.324422	0.275954	0.45511	No	Yes	0.440024
T303_07240	0.788853	-0.342172	0.276234	0.455131	No	Yes	-0.674677
T303_08555	1.46284	0.548771	0.278659	0.457463	No	Yes	0.0740277
T303_00560	1.45139	0.537438	0.281052	0.460838	No	Yes	-0.555187
T303_00935	0.72682	-0.460329	0.284051	0.463079	No	Yes	-0.152426
T303_02595	0.780421	-0.357676	0.283636	0.463079	No	Yes	-0.17219
T303_07265	0.775615	-0.366587	0.285487	0.464088	No	Yes	-0.303416
T303_02025	0.735892	-0.442434	0.290729	0.471258	No	Yes	-0.236282
T303_04975	0.848291	-0.237369	0.291472	0.471564	No	Yes	0.498716
T303_02345	0.719924	-0.474084	0.29214	0.471748	No	Yes	0.466503
T303_04815	0.838139	-0.254739	0.296945	0.478146	No	Yes	-0.444756
T303_03895	0.826512	-0.274892	0.298899	0.479549	No	Yes	0.050915
T303_04345	1.18722	0.247591	0.29818	0.479549	No	Yes	-0.347716
T303_04045	0.80508	-0.312796	0.303037	0.484291	No	Yes	1.49517
T303_04305	1.14894	0.200309	0.304025	0.485413	No	Yes	0.680309
T303_01095	1.12284	0.16715	0.306344	0.487744	No	Yes	0.0863854
T303_00040	0.773873	-0.369831	0.310494	0.49192	No	Yes	-0.363562
T303_00615	1.40279	0.488299	0.31128	0.49192	No	Yes	1.57095
T303_06980	1.1539	0.206512	0.310405	0.49192	No	Yes	0.581324
T303_02805	1.24292	0.313732	0.312653	0.492312	No	Yes	-0.52051
T303_05140	0.832066	-0.265229	0.314649	0.494034	No	Yes	0.466599
T303_00605	1.44253	0.528604	0.315398	0.494754	No	Yes	-0.358524
T303_00045	0.791093	-0.33808	0.317545	0.497205	No	Yes	0.177723
T303_00315	0.885644	-0.175201	0.318577	0.497904	No	Yes	0.176653
T303_00550	1.41994	0.50583	0.323449	0.502727	No	Yes	-0.718864
T303_06915	0.877281	-0.188889	0.324823	0.503964	No	Yes	0.339585
T303_06680	0.876601	-0.190007	0.328612	0.507529	No	Yes	0.093993
T303_00600	1.41971	0.505598	0.329145	0.507885	No	Yes	-0.980031
T303_02605	0.79021	-0.339692	0.330036	0.507885	No	Yes	-0.686667
T303_06180	0.760829	-0.394356	0.329946	0.507885	No	Yes	0.56511
T303_01675	0.863684	-0.211424	0.332275	0.510409	No	Yes	-0.097074
T303_04580	0.838311	-0.254443	0.333024	0.511097	No	Yes	0.871873
T303_00585	1.40613	0.491729	0.33932	0.518234	No	Yes	0.263803
T303_04595	1.16613	0.221725	0.339501	0.518234	No	Yes	0.764181
T303_00610	1.42044	0.506335	0.342283	0.520923	No	Yes	-0.38391
T303_02315	0.854164	-0.227416	0.342487	0.520923	No	Yes	-0.112563
T303_02755	1.18353	0.243101	0.343552	0.521566	No	Yes	0.561981
T303_00310	0.856906	-0.222791	0.348826	0.525881	No	Yes	-0.461897
T303_02490	0.799778	-0.322329	0.347985	0.525881	No	Yes	0.129672
T303_04880	0.864483	-0.21009	0.349083	0.525881	No	Yes	-0.0273772
T303_09700	0.872261	-0.197169	0.349145	0.525881	No	Yes	-0.0727
T303_00555	1.38308	0.467882	0.352293	0.529684	No	Yes	-0.216663
T303_04145	1.1119	0.153032	0.353016	0.530303	No	Yes	-0.384793
T303_07350	0.685971	-0.54378	0.353754	0.530475	No	Yes	-0.936036
T303_02585	0.813199	-0.29832	0.355292	0.531844	No	Yes	-0.69041
T303_08675	1.14377	0.193798	0.355041	0.531844	No	Yes	0.814844
T303_05530	0.8387	-0.253773	0.356409	0.53258	No	Yes	-0.28785
T303_00530	1.35882	0.442356	0.357293	0.533433	No	Yes	-0.67028
T303_00565	1.39074	0.47585	0.360421	0.536689	No	Yes	-0.430323
T303_01650	0.86645	-0.206812	0.368646	0.543706	No	Yes	-0.224457
T303_06385	1.21364	0.279335	0.368477	0.543706	No	Yes	-0.546123
T303_00520	1.30012	0.378641	0.369367	0.544296	No	Yes	-0.329352
T303_07065	0.824511	-0.27839	0.374161	0.548039	No	Yes	-0.413452
T303_09650	1.11683	0.159413	0.379803	0.5525	No	Yes	-0.391743
T303_00810	0.876303	-0.190498	0.382191	0.555499	No	Yes	-0.361004
T303_05040	0.887218	-0.172639	0.38309	0.55633	No	Yes	-0.0852853
T303_08335	0.778033	-0.362097	0.383715	0.556703	No	Yes	0.160886
T303_08835	0.836294	-0.257918	0.384914	0.557552	No	Yes	-0.458959
T303_03055	0.816187	-0.293029	0.38733	0.560098	No	Yes	-0.552451
T303_02165	0.838307	-0.254449	0.390425	0.564095	No	Yes	0.911447
T303_04530	1.16006	0.214198	0.391286	0.564232	No	Yes	0.033357
T303_00595	1.37107	0.455307	0.392695	0.565052	No	Yes	0.0518235
T303_06400	0.835911	-0.25858	0.392906	0.565052	No	Yes	-0.378895
T303_06925	1.12752	0.173153	0.39308	0.565052	No	Yes	0.0666831
T303_08765	1.25595	0.328784	0.396268	0.567718	No	Yes	-0.245073
T303_00590	1.37941	0.464052	0.398826	0.569465	No	Yes	-1.05657
T303_02290	1.10386	0.142553	0.398395	0.569465	No	Yes	0.00610295
T303_09015	0.759174	-0.397498	0.398825	0.569465	No	Yes	0.997557
T303_06185	0.784665	-0.349851	0.402439	0.572223	No	Yes	1.29655
T303_06995	1.12735	0.172939	0.402131	0.572223	No	Yes	0.648127
T303_00540	1.35037	0.433351	0.404548	0.574477	No	Yes	-0.458411
T303_06575	1.13564	0.183509	0.416148	0.586327	No	Yes	0.119834
T303_08580	1.11043	0.15112	0.418895	0.587707	No	Yes	-0.0328369
T303_08540	0.884188	-0.177575	0.423297	0.591881	No	Yes	0.166846
T303_01415	0.899904	-0.152157	0.426593	0.59562	No	Yes	-0.00333572
T303_06940	0.752627	-0.409994	0.428475	0.597758	No	Yes	-0.396936
T303_04930	0.880207	-0.184085	0.439836	0.607138	No	Yes	-0.413047
T303_01320	1.11402	0.155771	0.441997	0.608478	No	Yes	0.691274
T303_04320	1.24467	0.315761	0.443017	0.608478	No	Yes	0.237852
T303_06190	0.805559	-0.311938	0.442443	0.608478	No	Yes	-0.0561217
T303_08705	0.912456	-0.132172	0.449715	0.613378	No	Yes	0.212695
T303_08860	0.860302	-0.217085	0.454204	0.616964	No	Yes	-1.07198
T303_06005	0.894632	-0.160633	0.457784	0.618864	No	Yes	-0.429871
T303_08030	0.903259	-0.146788	0.457432	0.618864	No	Yes	-0.58313
T303_06845	0.869761	-0.201308	0.46046	0.621493	No	Yes	-0.146165
T303_00820	0.912229	-0.132532	0.473874	0.631585	No	Yes	0.916944
T303_06410	0.870556	-0.199991	0.479716	0.637374	No	Yes	0.264626
T303_00570	1.30017	0.378697	0.486399	0.644744	No	Yes	-0.223418
T303_02095	1.12964	0.175863	0.501462	0.65671	No	Yes	1.25194
T303_00575	1.28403	0.360674	0.513797	0.668054	No	Yes	-0.547767
T303_09785	1.11449	0.156389	0.517662	0.672052	No	Yes	0.364879
T303_00580	1.27241	0.347566	0.521757	0.675308	No	Yes	-0.711426
T303_07215	1.0796	0.110495	0.526976	0.677939	No	Yes	0.862429
T303_08010	0.932398	-0.100982	0.526353	0.677939	No	Yes	0.302413
T303_02090	1.10241	0.140659	0.531194	0.679695	No	Yes	0.391447
T303_02740	1.1023	0.140513	0.533133	0.679695	No	Yes	-1.54604
T303_03540	0.889209	-0.169406	0.532178	0.679695	No	Yes	-0.072333
T303_04945	0.908368	-0.138651	0.531401	0.679695	No	Yes	0.558145
T303_07415	0.917486	-0.124243	0.532943	0.679695	No	Yes	0.239423
T303_08080	0.797133	-0.327107	0.532813	0.679695	No	Yes	0.083639
T303_09565	0.867946	-0.204323	0.534782	0.681287	No	Yes	0.446989
T303_03420	1.09481	0.130686	0.54362	0.688423	No	Yes	-0.3665
T303_07245	0.926033	-0.110864	0.545562	0.69037	No	Yes	-0.11053
T303_08075	0.783725	-0.35158	0.553391	0.697166	No	Yes	-0.846501
T303_01725	0.835896	-0.258605	0.557257	0.700664	No	Yes	0.317578
T303_04825	0.83384	-0.262158	0.557814	0.700664	No	Yes	1.66317
T303_04970	1.0881	0.12181	0.557408	0.700664	No	Yes	-0.717665
T303_03450	1.11232	0.15357	0.560537	0.702529	No	Yes	-0.126096
T303_05345	0.900802	-0.150718	0.565295	0.70693	No	Yes	-0.271649
T303_07645	1.22477	0.292512	0.56719	0.708779	No	Yes	0.61556
T303_04855	0.889898	-0.168287	0.573122	0.714094	No	Yes	-0.768486
T303_08070	0.782854	-0.353184	0.576496	0.717774	No	Yes	-0.185967
T303_04060	0.923714	-0.114482	0.586301	0.726263	No	Yes	-0.261461
T303_08740	0.931474	-0.102412	0.58729	0.726958	No	Yes	-0.261274
T303_02230	1.18534	0.245302	0.588101	0.727054	No	Yes	-0.277513
T303_06415	0.910062	-0.135964	0.588734	0.727054	No	Yes	-0.344502
T303_06570	0.918808	-0.122165	0.588819	0.727054	No	Yes	0.30339
T303_04165	0.900611	-0.151024	0.604806	0.740561	No	Yes	0.29844
T303_01620	0.879546	-0.185168	0.60785	0.743219	No	Yes	-0.191144
T303_02515	1.0889	0.122865	0.611776	0.746411	No	Yes	-0.519349
T303_07680	1.13603	0.184003	0.616019	0.750511	No	Yes	2.16518
T303_03905	1.11984	0.163295	0.629457	0.760352	No	Yes	-0.284158
T303_08085	0.86552	-0.20836	0.631052	0.761618	No	Yes	-0.536914
T303_07405	0.932194	-0.101298	0.633727	0.762264	No	Yes	-0.536914
T303_06700	1.132	0.178876	0.638292	0.766672	No	Yes	0.373035
T303_04065	0.935727	-0.0958411	0.645281	0.773206	No	Yes	0.424078
T303_04915	0.935458	-0.0962556	0.651703	0.778806	No	Yes	0.0265749
T303_08695	0.906619	-0.141432	0.660439	0.785938	No	Yes	-0.010291
T303_08430	1.06247	0.0874288	0.662085	0.786038	No	Yes	-0.478358
T303_01430	1.08645	0.119624	0.664609	0.787019	No	Yes	-0.139139
T303_03455	0.931905	-0.101745	0.666115	0.787311	No	Yes	-1.06524
T303_08035	1.05418	0.0761191	0.665758	0.787311	No	Yes	-0.298958
T303_06195	0.889252	-0.169335	0.670794	0.789858	No	Yes	0.833066
T303_02785	1.07092	0.0988559	0.680689	0.795149	No	Yes	-0.209607
T303_03730	1.16513	0.220485	0.678625	0.795149	No	Yes	-0.518129
T303_07045	0.916693	-0.125489	0.678613	0.795149	No	Yes	-0.440722
T303_08420	0.944424	-0.0824931	0.680603	0.795149	No	Yes	0.401387
T303_03720	0.917012	-0.124988	0.681512	0.795565	No	Yes	0.0694349
T303_06880	1.11611	0.158477	0.683804	0.796601	No	Yes	0.587556
T303_09585	0.88721	-0.172652	0.683283	0.796601	No	Yes	-0.0927692
T303_07395	0.946176	-0.0798203	0.689501	0.801045	No	Yes	-0.489444
T303_00270	1.10082	0.138581	0.697201	0.806716	No	Yes	-0.196319
T303_02085	1.06908	0.0963691	0.706502	0.813026	No	Yes	0.156482
T303_02590	0.920141	-0.120073	0.706237	0.813026	No	Yes	-0.647185
T303_03155	0.814325	-0.296323	0.706334	0.813026	No	Yes	-0.240307
T303_09005	1.07241	0.100862	0.718868	0.821701	No	Yes	-0.6317
T303_09180	0.932803	-0.100355	0.718064	0.821701	No	Yes	0.708574
T303_00325	0.937731	-0.0927545	0.726858	0.82972	No	Yes	0.618628
T303_02010	1.05172	0.0727452	0.726626	0.82972	No	Yes	0.833921
T303_05720	0.940569	-0.0883948	0.737765	0.838235	No	Yes	0.811179
T303_04835	1.11006	0.150644	0.739076	0.839164	No	Yes	2.25302
T303_09120	1.07432	0.103419	0.742462	0.842447	No	Yes	-0.584415
T303_02365	0.960015	-0.0588713	0.74765	0.844281	No	Yes	0.208649
T303_02720	1.05102	0.0717859	0.749612	0.845487	No	Yes	0.380064
T303_09680	1.05815	0.0815375	0.750418	0.845835	No	Yes	0.245363
T303_08285	0.901387	-0.149781	0.753177	0.848383	No	Yes	-0.132633
T303_07050	0.936986	-0.0939013	0.756893	0.852006	No	Yes	-0.391238
T303_03875	1.04464	0.0630104	0.758901	0.853137	No	Yes	1.03644
T303_02195	0.946038	-0.0800298	0.759953	0.853665	No	Yes	0.201637
T303_05360	1.03845	0.054433	0.765515	0.857175	No	Yes	-0.316432
T303_02410	1.03311	0.0469891	0.77922	0.869091	No	Yes	0.961666
T303_02815	0.943578	-0.0837863	0.780772	0.870252	No	Yes	-0.236977
T303_06445	1.06292	0.088038	0.783908	0.872604	No	Yes	-0.539845
T303_06305	0.887338	-0.172444	0.78921	0.876786	No	Yes	1.21474
T303_03995	1.03358	0.0476441	0.798126	0.882658	No	Yes	-0.332101
T303_03165	1.06424	0.0898291	0.803654	0.886467	No	Yes	0.87186
T303_07425	1.03891	0.0550752	0.814166	0.895741	No	Yes	-1.03149
T303_01850	0.935635	-0.0959821	0.817431	0.897592	No	Yes	1.21926
T303_08005	1.03217	0.0456866	0.817194	0.897592	No	Yes	-0.413047
T303_09780	1.06288	0.087983	0.831676	0.905638	No	Yes	-0.58368
T303_02335	1.03394	0.0481504	0.83389	0.906889	No	Yes	0.494487
T303_05260	1.03215	0.0456585	0.835398	0.907949	No	Yes	-0.00511617
T303_02240	1.06539	0.0913784	0.840423	0.912245	No	Yes	1.69677
T303_09010	0.96063	-0.0579471	0.843258	0.912993	No	Yes	0.604974
T303_02065	0.978658	-0.031124	0.846734	0.915011	No	Yes	-0.0865656
T303_06485	0.948249	-0.0766626	0.856311	0.921847	No	Yes	-0.121878
T303_07020	1.03241	0.046019	0.856908	0.921908	No	Yes	-1.54707
T303_08175	0.971244	-0.0420941	0.869813	0.930498	No	Yes	0.146255
T303_02245	1.05395	0.07581	0.871412	0.931623	No	Yes	0.112961
T303_07340	1.02445	0.0348485	0.874947	0.934206	No	Yes	-0.399433
T303_08880	0.983861	-0.0234741	0.880814	0.938138	No	Yes	0.246067
T303_01110	0.980504	-0.0284042	0.884895	0.941307	No	Yes	-0.597702
T303_04105	0.974423	-0.0373794	0.897707	0.948739	No	Yes	0.843785
T303_05155	1.03101	0.0440599	0.898736	0.948739	No	Yes	0.35382
T303_05985	1.02832	0.040283	0.898587	0.948739	No	Yes	1.59462
T303_08090	0.97131	-0.0419966	0.905592	0.953196	No	Yes	0.458809
T303_01855	1.02893	0.0411417	0.909825	0.954461	No	Yes	0.678224
T303_09770	0.975445	-0.0358672	0.909273	0.954461	No	Yes	-0.211625
T303_09775	1.03132	0.0444981	0.909426	0.954461	No	Yes	-0.657604
T303_00275	1.02375	0.0338611	0.912878	0.95512	No	Yes	-0.575866
T303_03210	1.02266	0.0323278	0.912932	0.95512	No	Yes	-0.17764
T303_02080	1.02248	0.0320693	0.918479	0.957874	No	Yes	1.47197
T303_09595	0.974063	-0.0379131	0.918011	0.957874	No	Yes	-0.363562
T303_01845	0.971448	-0.0417921	0.92109	0.959422	No	Yes	0.319816
T303_07670	1.02039	0.0291174	0.927192	0.962245	No	Yes	1.13337
T303_03140	0.985741	-0.0207191	0.930051	0.964036	No	Yes	-0.0796651
T303_05290	0.989316	-0.0154961	0.934102	0.965296	No	Yes	0.744356
T303_04865	0.985731	-0.020734	0.935248	0.965307	No	Yes	0.349774
T303_02075	1.0177	0.025311	0.942678	0.967946	No	Yes	1.66707
T303_06785	0.990306	-0.014053	0.940869	0.967946	No	Yes	0.061645
T303_07055	0.984666	-0.0222935	0.940986	0.967946	No	Yes	-0.462174
T303_03725	0.981689	-0.0266614	0.946136	0.969765	No	Yes	-1.26639
T303_00960	1.01424	0.0203942	0.948659	0.970239	No	Yes	0.417475
T303_01125	1.00751	0.010793	0.953228	0.972259	No	Yes	0.332193
T303_02710	1.00707	0.0101608	0.959624	0.973929	No	Yes	0.611327
T303_00840	1.01245	0.0178452	0.963424	0.97604	No	Yes	-0.531447
T303_02235	1.01472	0.0210839	0.97363	0.981705	No	Yes	-0.711903
T303_06730	0.984806	-0.0220884	0.973529	0.981705	No	Yes	0.856862
T303_04125	1.00576	0.0082874	0.974535	0.982036	No	Yes	-0.0590452
T303_09590	0.993705	-0.00911104	0.98077	0.986303	No	Yes	-0.157251
T303_07255	0.999505	-0.000713958	0.997428	0.998015	No	Yes	-0.597855
T303_04420	11.2786	3.49552	9.59162e-06	0.00366029	Up
T303_06115	3.95965	1.98537	1.71086e-05	0.00366029	Up
T303_05825	3.71887	1.89487	1.32586e-05	0.00366029	Up
T303_07955	3.71123	1.8919	1.72046e-05	0.00366029	Up
T303_05475	3.58972	1.84387	7.76704e-06	0.00366029	Up
T303_06110	4.56701	2.19125	3.23447e-05	0.0044729	Up
T303_04035	3.0956	1.63022	2.77041e-05	0.0044729	Up
T303_02570	3.07397	1.6201	3.48105e-05	0.0044729	Up
T303_08470	0.280804	-1.83237	2.96277e-05	0.0044729	Down
T303_09235	0.25184	-1.98942	2.84516e-05	0.0044729	Down
T303_06120	4.76906	2.2537	4.33522e-05	0.00461159	Up
T303_06985	3.25538	1.70283	4.11543e-05	0.00461159	Up
T303_09245	0.196045	-2.35074	4.6782e-05	0.00468371	Down
T303_05935	2.90853	1.54029	5.04475e-05	0.00477009	Up
T303_06095	5.66878	2.50304	9.54472e-05	0.00687509	Up
T303_06105	5.29499	2.40463	0.000100985	0.00687509	Up
T303_05940	3.15703	1.65857	8.77041e-05	0.00687509	Up
T303_02160	2.54386	1.34702	0.000107851	0.00706009	Up
T303_00265	2.74325	1.45589	0.000124179	0.00774704	Up
T303_07325	2.36738	1.24329	0.00014319	0.00774704	Up
T303_09165	0.444586	-1.16946	0.000136565	0.00774704	Down
T303_08600	0.41236	-1.27802	0.000150207	0.00774704	Down
T303_07975	9.92082	3.31046	0.000159612	0.00798997	Up
T303_09240	0.230375	-2.11794	0.000181577	0.00826599	Down
T303_06200	3.6532	1.86916	0.000227052	0.00867992	Up
T303_07295	3.22614	1.68981	0.000240201	0.00867992	Up
T303_09100	3.12522	1.64396	0.000250876	0.00867992	Up
T303_08000	2.88887	1.53051	0.000260092	0.00867992	Up
T303_01460	2.32685	1.21838	0.000220352	0.00867992	Up
T303_05605	0.285623	-1.80782	0.000222311	0.00867992	Down
T303_06205	3.21194	1.68345	0.000279022	0.00904231	Up
T303_09570	0.320475	-1.64172	0.000281576	0.00904231	Down
T303_08725	4.01364	2.00491	0.000337886	0.00957606	Up
T303_09375	7.58505	2.92316	0.000368786	0.00980741	Up
T303_05925	2.71101	1.43883	0.000378681	0.0098927	Up
T303_04450	0.482656	-1.05093	0.000383618	0.0098927	Down
T303_09705	5.80564	2.53745	0.00041426	0.0105234	Up
T303_06975	8.00194	3.00035	0.000438546	0.0109393	Up
T303_08575	2.74734	1.45803	0.000443484	0.0109393	Up
T303_05495	3.59788	1.84715	0.000475504	0.0109642	Up
T303_03840	2.74762	1.45818	0.000478667	0.0109642	Up
T303_00795	2.67741	1.42084	0.000489589	0.0109642	Up
T303_09390	0.537519	-0.895612	0.000477483	0.0109642	Down
T303_05315	0.347516	-1.52485	0.000487609	0.0109642	Down
T303_07545	7.11057	2.82996	0.000499424	0.0109947	Up
T303_00910	4.45072	2.15404	0.000510426	0.0109947	Up
T303_09835	3.45036	1.78675	0.000534701	0.0109947	Up
T303_06520	2.75609	1.46262	0.00052414	0.0109947	Up
T303_09580	2.35883	1.23807	0.000544645	0.0110355	Up
T303_00790	2.79527	1.48299	0.000585109	0.0115797	Up
T303_09890	0.254284	-1.97549	0.000627227	0.0119948	Down
T303_08585	2.02924	1.02094	0.000640713	0.0121166	Up
T303_08065	0.543754	-0.878973	0.000651644	0.0121879	Down
T303_03445	4.51071	2.17336	0.000663113	0.0122676	Up
T303_02560	1.91342	0.936152	0.000692189	0.0124011	Up
T303_09465	0.507848	-0.977531	0.000683917	0.0124011	Down
T303_08460	0.36208	-1.46562	0.000691926	0.0124011	Down
T303_06100	4.75234	2.24864	0.000715084	0.0125471	Up
T303_03355	3.68162	1.88034	0.000713513	0.0125471	Up
T303_07555	6.22321	2.63766	0.000741097	0.0128709	Up
T303_08795	3.35979	1.74837	0.000762401	0.0129761	Up
T303_07695	2.52201	1.33457	0.000758798	0.0129761	Up
T303_09895	3.60035	1.84814	0.000797469	0.0133068	Up
T303_03590	0.532058	-0.910345	0.000857323	0.0141666	Down
T303_03845	3.56856	1.83534	0.000881263	0.0143273	Up
T303_09575	0.345663	-1.53256	0.000883879	0.0143273	Down
T303_08950	2.18694	1.12891	0.000895854	0.0143844	Up
T303_04070	2.76183	1.46563	0.000919628	0.0146281	Up
T303_02150	1.80299	0.850387	0.000987427	0.0152782	Up
T303_08025	0.544141	-0.877949	0.000985494	0.0152782	Down
T303_01055	2.63549	1.39807	0.00101013	0.0154886	Up
T303_08730	3.22494	1.68927	0.00103451	0.0157208	Up
T303_01465	2.29769	1.20018	0.00105107	0.0158312	Up
T303_06970	9.06477	3.18027	0.00109235	0.0159844	Up
T303_07520	3.35868	1.74789	0.00111148	0.0159844	Up
T303_00700	0.315137	-1.66595	0.00111626	0.0159844	Down
T303_08295	10.9956	3.45885	0.00113931	0.0160256	Up
T303_01615	3.69428	1.88529	0.00113833	0.0160256	Up
T303_07860	0.482244	-1.05216	0.00115715	0.0161432	Down
T303_04615	15.8315	3.98473	0.00122447	0.0168069	Up
T303_05325	0.379841	-1.39653	0.00121776	0.0168069	Down
T303_07560	5.62894	2.49286	0.00124664	0.0169742	Up
T303_00710	0.260636	-1.93989	0.00129192	0.0174511	Down
T303_01315	0.410265	-1.28537	0.00135602	0.0181728	Down
T303_09395	0.563674	-0.827067	0.0013678	0.0181874	Down
T303_07925	3.61334	1.85333	0.00140417	0.0183838	Up
T303_04765	1.90304	0.928308	0.00143603	0.01855	Up
T303_01975	6.80202	2.76596	0.00148413	0.018582	Up
T303_03975	4.64694	2.21628	0.00146702	0.018582	Up
T303_05845	2.16493	1.11432	0.0014619	0.018582	Up
T303_02180	0.484244	-1.04619	0.00148481	0.018582	Down
T303_07980	4.002	2.00072	0.00151181	0.0187007	Up
T303_05840	1.81409	0.859245	0.00151627	0.0187007	Up
T303_07565	3.90784	1.96637	0.00156522	0.0188937	Up
T303_03980	4.90448	2.2941	0.00161676	0.0192428	Up
T303_04195	2.38915	1.2565	0.00161631	0.0192428	Up
T303_07475	2.72133	1.44431	0.00164597	0.0194545	Up
T303_01115	0.473201	-1.07947	0.00167819	0.0194645	Down
T303_00915	2.59278	1.3745	0.00175245	0.0198845	Up
T303_06965	7.78538	2.96077	0.00179773	0.0201541	Up
T303_08625	1.62474	0.700207	0.00180568	0.0201541	Up
T303_03060	0.487703	-1.03592	0.00181173	0.0201541	Down
T303_00745	0.514702	-0.95819	0.00190946	0.0211033	Down
T303_07650	3.64191	1.8647	0.00195486	0.0213845	Up
T303_04075	2.52627	1.33701	0.00199477	0.021488	Up
T303_09420	2.43054	1.28127	0.00211792	0.0216584	Up
T303_01870	2.3211	1.21481	0.00205531	0.0216584	Up
T303_08680	1.79469	0.843733	0.00211342	0.0216584	Up
T303_07460	1.7489	0.806447	0.00213677	0.0216584	Up
T303_08945	1.7018	0.767064	0.0021302	0.0216584	Up
T303_08410	1.65349	0.725513	0.00212802	0.0216584	Up
T303_03615	0.521168	-0.94018	0.00213785	0.0216584	Down
T303_08735	3.47471	1.79689	0.00217783	0.0218039	Up
T303_08360	0.575223	-0.797807	0.00216758	0.0218039	Down
T303_04900	0.600292	-0.736262	0.00222006	0.0220968	Down
T303_08620	1.62493	0.70038	0.00227269	0.0223591	Up
T303_01960	0.582803	-0.778921	0.00230063	0.0223752	Down
T303_04705	2.73624	1.45219	0.00246514	0.0233034	Up
T303_03320	2.58535	1.37036	0.00251764	0.0233034	Up
T303_05735	2.01621	1.01165	0.00248469	0.0233034	Up
T303_08940	1.89716	0.923845	0.00253298	0.0233034	Up
T303_06555	0.623766	-0.680923	0.00247614	0.0233034	Down
T303_05320	0.375438	-1.41335	0.00258824	0.0235571	Down
T303_02000	3.08139	1.62358	0.00265091	0.0238286	Up
T303_07105	0.597457	-0.743092	0.00266007	0.0238286	Down
T303_04435	0.584155	-0.775577	0.00264112	0.0238286	Down
T303_00320	1.94163	0.957266	0.00276843	0.0245409	Up
T303_00785	2.77829	1.4742	0.00283071	0.0249631	Up
T303_05630	2.21306	1.14605	0.00298985	0.026096	Up
T303_00245	3.15102	1.65582	0.00305525	0.0262456	Up
T303_09040	2.37679	1.24901	0.00306867	0.0262456	Up
T303_04525	0.578668	-0.789192	0.00302748	0.0262456	Down
T303_03815	1.91035	0.933837	0.0031639	0.0267908	Up
T303_04200	2.55875	1.35544	0.00326291	0.0274924	Up
T303_09370	4.33305	2.11538	0.0035004	0.0290619	Up
T303_02220	0.595064	-0.748884	0.00357846	0.0291798	Down
T303_04570	0.573326	-0.802571	0.00358318	0.0291798	Down
T303_04010	2.12424	1.08695	0.00361758	0.0293196	Up
T303_04780	1.83185	0.8733	0.00382029	0.0305459	Up
T303_05480	1.97736	0.983573	0.00403311	0.0316606	Up
T303_02840	1.80661	0.853286	0.00403663	0.0316606	Up
T303_02385	0.52604	-0.926755	0.00402966	0.0316606	Down
T303_03585	0.578048	-0.790738	0.00405818	0.0316836	Down
T303_07100	0.581088	-0.783171	0.0042002	0.0323473	Down
T303_07260	2.75985	1.46459	0.00436113	0.0329895	Up
T303_09170	0.347481	-1.52499	0.00434532	0.0329895	Down
T303_07915	2.35266	1.23429	0.00463121	0.034271	Up
T303_02790	1.78839	0.838659	0.00491321	0.0355027	Up
T303_06560	0.648756	-0.624252	0.00498132	0.0357687	Down
T303_01470	0.552393	-0.856232	0.00500173	0.0357687	Down
T303_09790	0.605495	-0.723814	0.00508168	0.0361884	Down
T303_02215	0.648841	-0.624063	0.00516609	0.0364842	Down
T303_01910	3.97678	1.9916	0.00527724	0.0371151	Up
T303_09520	1.95024	0.963654	0.00535234	0.0374884	Up
T303_09365	2.50325	1.3238	0.00582841	0.0404896	Up
T303_06950	2.81932	1.49535	0.00586213	0.0405583	Up
T303_02825	0.549585	-0.863584	0.00594097	0.0409374	Down
T303_02890	3.58527	1.84208	0.00611543	0.0419696	Up
T303_09415	2.12182	1.0853	0.00619729	0.0421912	Up
T303_08930	1.69987	0.765422	0.00632336	0.042878	Up
T303_06090	5.15602	2.36626	0.00638614	0.0431318	Up
T303_02970	1.88729	0.916314	0.00643272	0.0432747	Up
T303_03110	0.512763	-0.963636	0.00669566	0.0446902	Down
T303_04550	2.01008	1.00725	0.00693555	0.0457532	Up
T303_04700	1.63884	0.712672	0.00721971	0.0470973	Up
T303_06960	4.81624	2.26791	0.00733167	0.0476279	Up
T303_05815	3.64426	1.86563	0.00752163	0.0480207	Up
T303_09125	2.56791	1.36059	0.00752334	0.0480207	Up
T303_01290	2.03086	1.02209	0.00750988	0.0480207	Up
T303_04770	1.91117	0.934457	0.00744466	0.0480207	Up
T303_09050	1.61241	0.689215	0.00754622	0.0480207	Up
T303_04205	1.50309	0.587933	0.00756143	0.0480207	Up
T303_08405	1.60336	0.6811	0.00768071	0.0485134	Up
T303_04455	0.543925	-0.878521	0.00769602	0.0485134	Down
T303_08995	1.9505	0.963843	0.00791915	0.0493714	Up
T303_08015	0.599043	-0.739268	0.00790268	0.0493714	Down
T303_03650	0.371568	-1.4283	0.00808849	0.0500604	No
T303_07015	2.47034	1.30471	0.00826676	0.0508861	No
T303_05510	1.59432	0.672939	0.00835635	0.0511601	No
T303_06355	1.56749	0.64846	0.00847565	0.0517045	No
T303_08330	1.74941	0.806872	0.00891604	0.0538124	No
T303_03240	0.663998	-0.590749	0.00949266	0.0564913	No
T303_01450	0.593844	-0.751843	0.00958157	0.0567087	No
T303_07470	2.55835	1.35522	0.00959583	0.0567087	No
T303_06850	0.619035	-0.691908	0.00970678	0.0571659	No
T303_06780	1.78335	0.834588	0.00979591	0.0574919	No
T303_02435	0.361721	-1.46705	0.0100352	0.0586478	No
T303_06635	1.45513	0.541149	0.0100702	0.0586478	No
T303_05220	2.285	1.19219	0.0100962	0.0586478	No
T303_03105	0.544588	-0.876763	0.0107842	0.0622196	No
T303_00750	0.593254	-0.753277	0.0109394	0.06269	No
T303_04180	3.11268	1.63816	0.0111483	0.0635525	No
T303_00155	2.86976	1.52093	0.0113321	0.0641349	No
T303_05105	2.4536	1.2949	0.0113423	0.0641349	No
T303_05805	0.667368	-0.583445	0.0114738	0.0646635	No
T303_07820	0.378807	-1.40047	0.0115532	0.0648963	No
T303_03170	1.59355	0.672249	0.0116904	0.0653907	No
T303_06350	1.49011	0.575421	0.0117477	0.0653907	No
T303_06590	1.63749	0.711486	0.0117565	0.0653907	No
T303_05640	0.609424	-0.714483	0.0119244	0.0661084	No
T303_02420	2.40414	1.26552	0.0120418	0.0662476	No
T303_09460	0.618001	-0.694318	0.0122692	0.0671453	No
T303_06315	0.620268	-0.689036	0.0126928	0.0688298	No
T303_03605	0.478075	-1.06469	0.0126983	0.0688298	No
T303_05860	1.67361	0.742967	0.0129289	0.0696429	No
T303_08985	5.83373	2.54442	0.0129302	0.0696429	No
T303_07920	2.58257	1.36881	0.0130192	0.0698775	No
T303_07830	0.397978	-1.32924	0.0130666	0.0698775	No
T303_09470	0.627798	-0.671628	0.0130969	0.0698775	No
T303_02190	0.561252	-0.83328	0.0133566	0.0703807	No
T303_00965	1.76164	0.816916	0.0135282	0.0709353	No
T303_09300	0.541036	-0.886204	0.0137612	0.0718452	No
T303_07510	2.2303	1.15724	0.0139964	0.0726276	No
T303_00485	1.53305	0.616402	0.0141398	0.0729272	No
T303_05250	1.54513	0.627724	0.014359	0.0735994	No
T303_09545	2.03473	1.02483	0.0145236	0.0739786	No
T303_09090	1.55447	0.636421	0.014561	0.0739786	No
T303_04805	1.55933	0.640925	0.0147663	0.0746089	No
T303_07810	0.47206	-1.08296	0.0149808	0.0746368	No
T303_04015	1.70124	0.766584	0.0150022	0.0746368	No
T303_03985	3.29157	1.71878	0.0150177	0.0746368	No
T303_09070	1.64624	0.719175	0.0150414	0.0746368	No
T303_02545	1.63263	0.707202	0.0156102	0.0756871	No
T303_08990	1.83629	0.876792	0.0156136	0.0756871	No
T303_09900	0.380257	-1.39495	0.0156159	0.0756871	No
T303_02045	2.55423	1.35289	0.0156165	0.0756871	No
T303_06615	1.67971	0.748211	0.0157475	0.0756871	No
T303_07445	0.650731	-0.619867	0.0157906	0.0756871	No
T303_05830	3.32348	1.7327	0.0158112	0.0756871	No
T303_04995	0.613247	-0.705459	0.0158258	0.0756871	No
T303_03935	0.663552	-0.591719	0.0158311	0.0756871	No
T303_05595	0.662285	-0.594475	0.0162679	0.0775573	No
T303_07170	0.659767	-0.599972	0.0164183	0.0779008	No
T303_00150	2.23381	1.1595	0.0164886	0.0779543	No
T303_02360	1.97565	0.982326	0.0173215	0.0806055	No
T303_02905	18.7205	4.22654	0.0175404	0.0806055	No
T303_01785	0.506592	-0.981104	0.0175491	0.0806055	No
T303_08440	2.26968	1.18249	0.0176281	0.0806055	No
T303_06550	1.50275	0.587608	0.017665	0.0806055	No
T303_07220	1.5782	0.658278	0.0178971	0.0812889	No
T303_03565	0.666307	-0.58574	0.0179103	0.0812889	No
T303_08225	1.62539	0.700786	0.0181818	0.0823018	No
T303_03940	0.681459	-0.553302	0.0182757	0.0825074	No
T303_04950	0.650685	-0.61997	0.0183383	0.082571	No
T303_07740	1.76067	0.816128	0.0185995	0.0833061	No
T303_08265	1.4689	0.554737	0.0187164	0.0834294	No
T303_05705	0.676398	-0.564056	0.0187251	0.0834294	No
T303_04650	0.601101	-0.734322	0.0190724	0.0846957	No
T303_03835	0.452349	-1.14449	0.0191088	0.0846957	No
T303_03330	1.74782	0.805557	0.0191703	0.0847476	No
T303_07420	0.669308	-0.579257	0.0195265	0.0857675	No
T303_04495	0.687817	-0.539904	0.0196108	0.0857675	No
T303_04285	1.57347	0.653949	0.0196384	0.0857675	No
T303_03810	1.52569	0.609461	0.019653	0.0857675	No
T303_00260	2.01938	1.01391	0.0197339	0.0858707	No
T303_02030	2.45892	1.29802	0.0198188	0.0858707	No
T303_07720	0.451516	-1.14715	0.0200144	0.0864581	No
T303_04685	6.23117	2.6395	0.0202011	0.0868348	No
T303_06375	1.51036	0.59489	0.0202036	0.0868348	No
T303_00255	2.01044	1.00751	0.0203283	0.0870288	No
T303_04630	0.565316	-0.82287	0.020351	0.0870288	No
T303_07115	0.680765	-0.554771	0.0205327	0.0873665	No
T303_06270	1.65188	0.724108	0.0206066	0.0873876	No
T303_02850	2.27779	1.18763	0.0206806	0.0873876	No
T303_05645	0.681888	-0.552394	0.0207165	0.0873876	No
T303_06755	0.632964	-0.659806	0.0207755	0.0873876	No
T303_07455	0.700695	-0.513141	0.0208417	0.0873876	No
T303_03970	0.737512	-0.439262	0.020897	0.0873876	No
T303_03560	0.702251	-0.509941	0.0209248	0.0873876	No
T303_09140	0.52714	-0.923741	0.0209919	0.0873876	No
T303_08200	0.678236	-0.560142	0.0209997	0.0873876	No
T303_03335	2.0181	1.013	0.0211663	0.0878568	No
T303_04190	2.18915	1.13037	0.0212395	0.0878568	No
T303_07700	3.93146	1.97506	0.0214035	0.087957	No
T303_07360	1.69311	0.759676	0.021415	0.087957	No
T303_05895	1.69729	0.76323	0.0215367	0.087957	No
T303_03570	0.71026	-0.493582	0.0223169	0.0902294	No
T303_08110	1.56237	0.643737	0.022322	0.0902294	No
T303_04085	1.95964	0.97059	0.0223591	0.0902294	No
T303_07725	0.542134	-0.883278	0.0223837	0.0902294	No
T303_06220	1.37223	0.456526	0.0228058	0.0913307	No
T303_07550	3.54961	1.82766	0.0232617	0.0925034	No
T303_01965	0.689221	-0.536961	0.0233316	0.0925651	No
T303_06595	0.714138	-0.485726	0.0234745	0.0929154	No
T303_06955	2.586	1.37072	0.0237322	0.0937173	No
T303_03250	0.596995	-0.744208	0.0239265	0.0942659	No
T303_08345	0.657655	-0.604597	0.0240173	0.0944052	No
T303_06725	1.47758	0.563234	0.0242434	0.0950744	No
T303_06825	1.96728	0.976205	0.0243727	0.0951429	No
T303_08640	1.72688	0.788166	0.0245332	0.0955503	No
T303_04775	1.47565	0.561352	0.0249879	0.0970991	No
T303_06860	0.547914	-0.867979	0.025087	0.0972622	No
T303_08105	1.90818	0.932196	0.0251827	0.0974113	No
T303_05780	1.9377	0.954346	0.0253216	0.0977265	No
T303_02725	1.48796	0.573335	0.0255887	0.0982638	No
T303_05195	1.88844	0.917199	0.0256179	0.0982638	No
T303_07280	0.258518	-1.95166	0.025855	0.0988883	No
T303_05485	2.60776	1.38281	0.0260906	0.0993326	No
T303_01090	0.714644	-0.484704	0.0260924	0.0993326	No
T303_00225	1.41282	0.49858	0.0261463	0.0993326	No
T303_05185	2.06254	1.04442	0.026896	0.101947	No
T303_06370	1.38983	0.474913	0.0269845	0.101947	No
T303_03850	1.77617	0.828766	0.0270741	0.101947	No
T303_03395	1.71192	0.775619	0.0271541	0.102023	No
T303_04095	0.572911	-0.803618	0.0273318	0.102464	No
T303_05020	1.48856	0.573921	0.0274881	0.102824	No
T303_06345	1.46564	0.551528	0.0278115	0.10364	No
T303_08325	1.61238	0.689194	0.0278923	0.103652	No
T303_09025	2.72605	1.44681	0.0284521	0.105502	No
T303_02855	2.18683	1.12884	0.0286806	0.105888	No
T303_08130	1.85397	0.890622	0.0290186	0.106517	No
T303_07580	1.9233	0.943585	0.0290854	0.106517	No
T303_08275	1.41047	0.496173	0.0296839	0.107818	No
T303_03890	1.47487	0.560591	0.0305766	0.109837	No
T303_01990	1.92733	0.946603	0.0306104	0.109837	No
T303_02675	2.66289	1.41299	0.0306537	0.109837	No
T303_03345	1.95533	0.967412	0.0311056	0.111222	No
T303_02735	1.40402	0.489559	0.0312063	0.111348	No
T303_05135	11.8658	3.56874	0.0315497	0.112338	No
T303_05395	1.54359	0.626289	0.0316907	0.112387	No
T303_02645	2.36438	1.24146	0.032082	0.11299	No
T303_08925	1.42335	0.509287	0.032131	0.11299	No
T303_08840	0.602821	-0.730199	0.0322613	0.113214	No
T303_09495	2.01384	1.00995	0.0327894	0.114741	No
T303_03575	0.470465	-1.08784	0.0328314	0.114741	No
T303_05310	0.51624	-0.953887	0.0332161	0.115835	No
T303_07010	1.70131	0.766642	0.0332805	0.115835	No
T303_00830	8.24833	3.0441	0.0336957	0.116803	No
T303_03215	2.22903	1.15642	0.033796	0.116912	No
T303_02975	2.02279	1.01635	0.0340756	0.117462	No
T303_08445	2.12496	1.08744	0.0340929	0.117462	No
T303_01070	3.04974	1.60869	0.0347423	0.118738	No
T303_09045	0.728917	-0.456174	0.0354302	0.120604	No
T303_08810	2.1686	1.11676	0.0361172	0.122469	No
T303_08045	0.707072	-0.500071	0.0362361	0.122469	No
T303_02460	1.80054	0.848426	0.0362659	0.122469	No
T303_08790	1.76123	0.81658	0.0364745	0.122867	No
T303_05435	1.71745	0.78027	0.0365279	0.122867	No
T303_08260	1.54501	0.627617	0.0366102	0.122901	No
T303_08830	0.636417	-0.651957	0.0369402	0.123521	No
T303_06715	1.3716	0.455857	0.0377363	0.125022	No
T303_05915	0.672413	-0.57258	0.0377565	0.125022	No
T303_01420	1.60695	0.684328	0.0383541	0.126755	No
T303_00230	2.16781	1.11624	0.0385989	0.12707	No
T303_03340	1.68298	0.75102	0.0391729	0.127923	No
T303_04625	0.625912	-0.675969	0.039279	0.127923	No
T303_09560	1.90314	0.928383	0.0393175	0.127923	No
T303_04735	1.53819	0.621237	0.039353	0.127923	No
T303_01825	0.65022	-0.621001	0.0393825	0.127923	No
T303_02745	1.29952	0.377977	0.0397722	0.128938	No
T303_07585	1.78109	0.832762	0.0401615	0.129952	No
T303_04140	1.45081	0.536856	0.0403553	0.130163	No
T303_07730	2.53181	1.34017	0.0403795	0.130163	No
T303_02940	1.61606	0.692478	0.0407718	0.130931	No
T303_02105	1.70894	0.773101	0.0409962	0.131069	No
T303_06465	1.94326	0.958478	0.0410341	0.131069	No
T303_01695	0.581189	-0.782922	0.0410456	0.131069	No
T303_08450	0.434146	-1.20375	0.0411533	0.131167	No
T303_05235	1.32044	0.401018	0.0416607	0.132536	No
T303_01285	1.5813	0.661115	0.0425749	0.134939	No
T303_03070	0.634032	-0.657372	0.0427456	0.134984	No
T303_04655	1.6336	0.708051	0.0436804	0.137627	No
T303_09175	0.578754	-0.788979	0.0437464	0.137627	No
T303_08610	1.35642	0.439806	0.0439684	0.137816	No
T303_06150	1.71101	0.77485	0.0443194	0.138407	No
T303_03865	0.689567	-0.536238	0.0444503	0.138561	No
T303_07995	1.38469	0.469561	0.0454905	0.140628	No
T303_00250	1.99009	0.992835	0.0455264	0.140628	No
T303_05810	1.84596	0.884371	0.0460504	0.141887	No
T303_05740	1.4637	0.549622	0.0461007	0.141887	No
T303_02210	0.76851	-0.379865	0.0465558	0.142629	No
T303_09295	0.534397	-0.904016	0.0465815	0.142629	No
T303_06540	0.753118	-0.409053	0.0465932	0.142629	No
T303_07805	0.52126	-0.939924	0.0469626	0.143303	No
T303_08370	0.738216	-0.437886	0.0469817	0.143303	No
T303_07120	0.748238	-0.418431	0.0471311	0.143501	No
T303_00185	0.718839	-0.476258	0.0481681	0.146397	No
T303_02540	1.46413	0.550039	0.0491001	0.148963	No
T303_07735	2.87028	1.52119	0.049895	0.15057	No
T303_03825	2.65171	1.40692	0.0500481	0.150764	No
T303_04820	1.33029	0.411743	0.0502336	0.151048	No
T303_06360	1.52746	0.611136	0.0503196	0.151048	No
T303_00455	1.48401	0.569502	0.0504634	0.151212	No
T303_05945	1.60398	0.681657	0.0507233	0.151724	No
T303_04990	0.679208	-0.558075	0.0512048	0.152896	No
T303_04235	0.583329	-0.777617	0.0516189	0.153677	No
T303_06665	0.601794	-0.732659	0.051647	0.153677	No
T303_00740	1.78439	0.835432	0.0520687	0.15459	No
T303_08095	1.52663	0.61035	0.0521357	0.15459	No
T303_00645	0.536908	-0.897253	0.0534015	0.158068	No
T303_02455	1.82504	0.86793	0.0541779	0.159811	No
T303_04985	0.707433	-0.499335	0.0551621	0.161872	No
T303_06215	1.42443	0.510381	0.0556293	0.162962	No
T303_00815	0.745232	-0.424239	0.0557592	0.163062	No
T303_04050	1.27609	0.351727	0.0572782	0.166351	No
T303_06695	0.704006	-0.506341	0.0585153	0.168341	No
T303_02820	1.57957	0.659528	0.0585534	0.168341	No
T303_09315	0.74324	-0.4281	0.0587866	0.168632	No
T303_04845	1.88337	0.913314	0.0588529	0.168632	No
T303_01230	8.02889	3.0052	0.0594418	0.170033	No
T303_04260	0.688163	-0.539179	0.0605076	0.172214	No
T303_06225	1.29851	0.376855	0.0619403	0.175704	No
T303_07620	2.188	1.12961	0.0622227	0.175919	No
T303_06470	2.46686	1.30268	0.0623466	0.175977	No
T303_09145	0.74947	-0.416058	0.0626229	0.176277	No
T303_03880	2.00339	1.00245	0.0631215	0.17671	No
T303_06230	1.32445	0.405395	0.0631256	0.17671	No
T303_03310	0.772446	-0.372495	0.0634496	0.177326	No
T303_02370	0.574425	-0.799809	0.0636921	0.177638	No
T303_05375	1.72354	0.785372	0.0638938	0.177638	No
T303_07950	0.688455	-0.538565	0.0639282	0.177638	No
T303_01950	0.621861	-0.685337	0.0639829	0.177638	No
T303_04245	0.773619	-0.370305	0.0640831	0.177638	No
T303_07200	0.781657	-0.355392	0.0643935	0.178208	No
T303_03555	0.767013	-0.382677	0.0647432	0.178746	No
T303_07875	0.653845	-0.61298	0.0648098	0.178746	No
T303_04385	0.785677	-0.347993	0.064904	0.178746	No
T303_08510	0.678097	-0.560436	0.065279	0.179201	No
T303_03900	1.33482	0.416641	0.0663736	0.18162	No
T303_00660	1.46218	0.548121	0.0667807	0.182441	No
T303_03500	0.648643	-0.624503	0.0673756	0.183771	No
T303_07935	1.42484	0.510803	0.0675879	0.183907	No
T303_06275	1.29131	0.368836	0.0676414	0.183907	No
T303_03860	0.710858	-0.492367	0.0690994	0.187571	No
T303_04555	1.66019	0.731348	0.0709218	0.191602	No
T303_07505	1.68172	0.74994	0.0722644	0.194748	No
T303_05775	1.74583	0.803911	0.0723152	0.194748	No
T303_07990	1.24469	0.315789	0.0725149	0.194944	No
T303_00370	0.393672	-1.34493	0.0731379	0.195857	No
T303_03495	0.60527	-0.724349	0.0731875	0.195857	No
T303_03945	0.747234	-0.420369	0.0736213	0.196709	No
T303_06675	0.758998	-0.397831	0.0741996	0.197325	No
T303_04490	0.678806	-0.558929	0.0746911	0.198013	No
T303_07640	0.761276	-0.393508	0.0756279	0.200028	No
T303_08660	1.5007	0.585633	0.0769901	0.202943	No
T303_09435	0.710883	-0.492317	0.0772663	0.202943	No
T303_02525	1.28713	0.364155	0.0774369	0.203078	No
T303_08400	1.87482	0.906755	0.0784243	0.205232	No
T303_06565	0.796106	-0.328967	0.0788114	0.205731	No
T303_06760	0.702171	-0.510107	0.0791473	0.206292	No
T303_02300	1.67554	0.744626	0.0794379	0.206733	No
T303_00470	0.601837	-0.732555	0.0796217	0.206895	No
T303_02830	0.659063	-0.601511	0.0811439	0.210529	No
T303_01860	1.60489	0.682477	0.0820378	0.211737	No
T303_01720	1.37844	0.463037	0.0820976	0.211737	No
T303_02835	0.631118	-0.664019	0.0821071	0.211737	No
T303_09795	0.745613	-0.423501	0.0824187	0.212219	No
T303_08365	0.69715	-0.52046	0.0827326	0.212705	No
T303_03535	1.2927	0.370386	0.0832998	0.213771	No
T303_09515	1.37233	0.456628	0.0833985	0.213771	No
T303_06895	0.713173	-0.487677	0.0847741	0.216494	No
T303_03255	0.72305	-0.467832	0.0849705	0.216494	No
T303_03910	2.34009	1.22657	0.0851276	0.216494	No
T303_05470	1.46504	0.55094	0.0852257	0.216494	No
T303_01025	0.719345	-0.475244	0.0853327	0.216494	No
T303_07755	0.765393	-0.385728	0.0854782	0.216494	No
T303_05765	1.46089	0.546844	0.0859616	0.217072	No
T303_02885	0.70945	-0.495228	0.0865676	0.218279	No
T303_03230	0.754508	-0.406391	0.0871495	0.219421	No
T303_02795	1.44086	0.526935	0.0884466	0.221703	No
T303_08980	1.5703	0.651044	0.0888998	0.221813	No
T303_09500	1.52682	0.610528	0.0889736	0.221813	No
T303_04080	1.70917	0.773295	0.0890119	0.221813	No
T303_09425	0.780413	-0.35769	0.0910499	0.226229	No
T303_03855	1.69554	0.761743	0.0914338	0.226604	No
T303_05885	1.39355	0.478761	0.0915529	0.226604	No
T303_07660	1.40148	0.486952	0.0916003	0.226604	No
T303_03965	0.783612	-0.351788	0.0919462	0.22713	No
T303_00420	1.99102	0.993509	0.093989	0.23184	No
T303_02055	0.695762	-0.523335	0.0944787	0.232039	No
T303_09275	1.37519	0.459633	0.0946311	0.232078	No
T303_09250	1.4693	0.555132	0.0956568	0.233836	No
T303_08520	0.732882	-0.448346	0.0957602	0.233836	No
T303_09720	0.578539	-0.789513	0.0982064	0.239123	No
T303_07840	1.75552	0.811902	0.098381	0.239206	No
T303_04240	0.71643	-0.481102	0.0987123	0.23967	No
T303_09195	0.788338	-0.343114	0.0989803	0.239947	No
T303_00235	1.71588	0.778946	0.0991086	0.239947	No
T303_05085	1.76596	0.820457	0.0994435	0.240416	No
T303_00760	0.813619	-0.297575	0.0996506	0.240527	No
T303_06145	1.60911	0.686259	0.100055	0.240527	No
T303_04660	1.58228	0.662001	0.101758	0.243932	No
T303_03465	0.814161	-0.296615	0.102714	0.245878	No
T303_06710	1.74201	0.800754	0.103343	0.247037	No
T303_00115	0.751664	-0.41184	0.103924	0.247496	No
T303_04640	1.30191	0.380632	0.104026	0.247496	No
T303_06820	1.86635	0.900221	0.104141	0.247496	No
T303_03960	0.819579	-0.287046	0.104383	0.247496	No
T303_03795	2.34517	1.22969	0.104408	0.247496	No
T303_05835	0.731572	-0.450928	0.104816	0.247774	No
T303_00875	1.7975	0.845988	0.105325	0.248507	No
T303_08920	1.25866	0.331889	0.105534	0.248507	No
T303_03275	0.822834	-0.281327	0.105565	0.248507	No
T303_03675	0.636648	-0.651431	0.106169	0.249585	No
T303_05625	1.40409	0.489635	0.107199	0.251143	No
T303_06295	0.607376	-0.719338	0.107645	0.25132	No
T303_08210	0.811138	-0.301981	0.107937	0.251657	No
T303_03195	0.771421	-0.37441	0.108412	0.25234	No
T303_01920	1.59513	0.673678	0.108643	0.25234	No
T303_04710	1.40427	0.489818	0.108675	0.25234	No
T303_09110	0.730414	-0.453214	0.109235	0.252949	No
T303_02935	1.43351	0.519557	0.10963	0.25352	No
T303_08650	0.747747	-0.419379	0.110097	0.25391	No
T303_04210	1.31143	0.391145	0.111431	0.256292	No
T303_05200	1.63481	0.709122	0.112009	0.256757	No
T303_08145	1.31662	0.396841	0.112088	0.256757	No
T303_07750	1.40392	0.489462	0.112237	0.256757	No
T303_08190	0.668344	-0.581337	0.112472	0.256949	No
T303_02800	1.33139	0.412933	0.113412	0.258751	No
T303_09115	0.748022	-0.418848	0.115094	0.261885	No
T303_05855	1.81405	0.859212	0.115376	0.262177	No
T303_05975	1.66733	0.737537	0.115594	0.26232	No
T303_09410	0.723772	-0.466393	0.11593	0.262478	No
T303_08385	1.32108	0.401718	0.115972	0.262478	No
T303_08505	0.741706	-0.43108	0.117131	0.264292	No
T303_05770	1.50905	0.593639	0.117208	0.264292	No
T303_07185	0.78913	-0.341664	0.117239	0.264292	No
T303_08645	0.775846	-0.366158	0.117415	0.264339	No
T303_00390	0.763694	-0.388934	0.119979	0.268829	No
T303_06330	1.42238	0.508309	0.120721	0.269573	No
T303_09130	1.38764	0.472639	0.121496	0.270663	No
T303_07375	0.693031	-0.529008	0.122236	0.2716	No
T303_03830	0.601557	-0.733227	0.123923	0.274991	No
T303_07745	2.23555	1.16063	0.124575	0.275359	No
T303_04160	0.75888	-0.398057	0.126019	0.27783	No
T303_07495	0.712671	-0.488692	0.126708	0.278988	No
T303_01060	0.385417	-1.37551	0.127328	0.27999	No
T303_01440	1.46575	0.551642	0.128095	0.28095	No
T303_07850	1.46923	0.555065	0.128513	0.281505	No
T303_09905	0.406361	-1.29916	0.128927	0.282049	No
T303_06160	1.57614	0.656395	0.130027	0.283725	No
T303_09655	0.818683	-0.288623	0.132163	0.287499	No
T303_09265	1.54671	0.629205	0.132282	0.287499	No
T303_04860	0.800399	-0.321208	0.132426	0.287499	No
T303_05910	2.19325	1.13307	0.132539	0.287499	No
T303_08355	0.662418	-0.594187	0.132601	0.287499	No
T303_00380	0.622155	-0.684655	0.133109	0.288234	No
T303_01410	0.67246	-0.572479	0.133398	0.288491	No
T303_08615	1.20954	0.274461	0.13456	0.290166	No
T303_08215	0.824517	-0.278378	0.135193	0.290895	No
T303_02050	0.651619	-0.6179	0.135449	0.291079	No
T303_01605	1.76452	0.819279	0.136705	0.291653	No
T303_07370	1.50154	0.586446	0.136786	0.291653	No
T303_06610	1.23212	0.301142	0.136916	0.291653	No
T303_05865	1.26866	0.343304	0.137137	0.29176	No
T303_05415	0.683934	-0.548071	0.138106	0.293455	No
T303_04090	1.38776	0.472762	0.138385	0.293679	No
T303_07905	1.30053	0.379104	0.13917	0.294978	No
T303_06990	1.19888	0.261683	0.140277	0.296008	No
T303_09320	0.804095	-0.314562	0.140352	0.296008	No
T303_01425	1.45436	0.540383	0.140769	0.296521	No
T303_01635	0.817836	-0.290117	0.14097	0.296577	No
T303_08755	1.79816	0.846524	0.141812	0.29766	No
T303_07225	1.24593	0.317225	0.141835	0.29766	No
T303_01955	0.764302	-0.387784	0.142537	0.298436	No
T303_00925	0.656386	-0.607383	0.142555	0.298436	No
T303_00860	0.7312	-0.451663	0.142759	0.298496	No
T303_05635	0.670087	-0.57758	0.145059	0.302562	No
T303_03620	0.759593	-0.396702	0.145901	0.303573	No
T303_01015	0.811049	-0.302138	0.146258	0.303819	No
T303_08170	0.82277	-0.281439	0.148389	0.307036	No
T303_06670	0.817083	-0.291445	0.148467	0.307036	No
T303_06240	1.22876	0.2972	0.149585	0.308684	No
T303_09035	1.34568	0.428337	0.15064	0.310365	No
T303_08565	1.21515	0.281137	0.150957	0.310365	No
T303_06050	0.72342	-0.467095	0.150988	0.310365	No
T303_05750	1.38812	0.473133	0.151882	0.311826	No
T303_04980	0.778499	-0.361234	0.153363	0.314106	No
T303_03775	1.63967	0.713406	0.153543	0.314106	No
T303_05175	1.36484	0.448735	0.155622	0.317209	No
T303_01575	0.746935	-0.420945	0.15621	0.31765	No
T303_06265	1.32442	0.405358	0.156212	0.31765	No
T303_02625	0.690243	-0.534824	0.156758	0.318056	No
T303_08050	0.736411	-0.441417	0.158105	0.319651	No
T303_09135	0.686144	-0.543416	0.158135	0.319651	No
T303_02350	1.27542	0.350972	0.159326	0.320876	No
T303_07130	0.53078	-0.913814	0.159626	0.320876	No
T303_04890	0.799167	-0.323431	0.160818	0.32181	No
T303_00690	1.80743	0.853941	0.160847	0.32181	No
T303_06545	4.20545	2.07226	0.160905	0.32181	No
T303_08685	1.4453	0.531371	0.16113	0.321881	No
T303_05010	1.22694	0.295066	0.16227	0.323503	No
T303_04100	0.723247	-0.46744	0.162322	0.323503	No
T303_03645	1.38667	0.47163	0.163502	0.325475	No
T303_02440	1.23973	0.310031	0.164122	0.326326	No
T303_09450	0.733307	-0.44751	0.164425	0.326548	No
T303_07795	0.745824	-0.423093	0.164795	0.326902	No
T303_06380	1.30158	0.380269	0.165139	0.327029	No
T303_03925	1.47419	0.559922	0.165379	0.327029	No
T303_04355	0.804921	-0.313082	0.165436	0.327029	No
T303_08910	1.33812	0.420211	0.165977	0.327718	No
T303_00640	0.73642	-0.4414	0.166525	0.32842	No
T303_01360	0.748164	-0.418574	0.167142	0.328874	No
T303_09310	0.836686	-0.257241	0.168422	0.33092	No
T303_00205	0.716584	-0.480793	0.169692	0.332633	No
T303_05685	1.48857	0.573931	0.169834	0.332633	No
T303_01030	0.787287	-0.345038	0.17011	0.33279	No
T303_04505	0.795985	-0.329186	0.172188	0.334806	No
T303_05555	0.523248	-0.934432	0.172246	0.334806	No
T303_05070	1.86474	0.898974	0.173938	0.337178	No
T303_04905	0.731401	-0.451265	0.176185	0.340757	No
T303_01905	1.72626	0.787646	0.176655	0.341099	No
T303_02020	0.640683	-0.642318	0.177289	0.341728	No
T303_09255	0.677437	-0.561842	0.178047	0.342413	No
T303_04350	0.836549	-0.257478	0.17834	0.34259	No
T303_01565	1.35381	0.43703	0.178581	0.342667	No
T303_06260	1.41471	0.500505	0.179762	0.344544	No
T303_08700	1.46246	0.548402	0.181772	0.347223	No
T303_07775	0.711396	-0.491275	0.181987	0.347242	No
T303_01830	0.833105	-0.26343	0.182908	0.347831	No
T303_03700	0.836076	-0.258294	0.183451	0.348296	No
T303_09820	0.839084	-0.253112	0.185561	0.350791	No
T303_00975	1.40781	0.49345	0.185701	0.350791	No
T303_07530	1.42785	0.513845	0.188078	0.353936	No
T303_06640	1.2093	0.274178	0.188095	0.353936	No
T303_09220	0.726808	-0.460353	0.188197	0.353936	No
T303_09405	0.753572	-0.408184	0.188436	0.353993	No
T303_05490	0.825714	-0.276287	0.189444	0.355495	No
T303_05785	2.01199	1.00862	0.1905	0.357082	No
T303_04290	0.835778	-0.258808	0.191296	0.358181	No
T303_04480	0.570615	-0.809411	0.191701	0.358544	No
T303_02750	1.20203	0.265473	0.192135	0.358961	No
T303_03190	0.82803	-0.272246	0.192482	0.359215	No
T303_06300	0.677435	-0.561846	0.195696	0.36348	No
T303_04560	0.628554	-0.669891	0.195784	0.36348	No
T303_03360	2.09227	1.06507	0.195802	0.36348	No
T303_03800	1.43528	0.521335	0.195835	0.36348	No
T303_06290	0.673334	-0.570606	0.196161	0.363619	No
T303_00770	0.843326	-0.245838	0.197358	0.364764	No
T303_01665	0.832346	-0.264745	0.197384	0.364764	No
T303_07765	0.834901	-0.260322	0.198476	0.365873	No
T303_08975	1.7209	0.783167	0.198629	0.365873	No
T303_08825	0.758219	-0.399314	0.199555	0.366851	No
T303_02355	1.21883	0.2855	0.200017	0.366851	No
T303_08915	1.26787	0.342406	0.200064	0.366851	No
T303_03245	1.37736	0.461902	0.200491	0.366851	No
T303_07080	1.38288	0.467679	0.200587	0.366851	No
T303_01065	0.582251	-0.780287	0.200748	0.366851	No
T303_06365	1.3303	0.411756	0.200884	0.366851	No
T303_08220	0.864834	-0.209505	0.20135	0.367082	No
T303_07575	1.34191	0.424286	0.201442	0.367082	No
T303_05280	1.22576	0.293674	0.202631	0.368048	No
T303_02400	0.821475	-0.283711	0.202894	0.368048	No
T303_01765	1.38546	0.47036	0.203054	0.368048	No
T303_04120	1.40492	0.490483	0.2056	0.371871	No
T303_06910	0.833266	-0.263151	0.206599	0.373281	No
T303_09225	0.73358	-0.446973	0.207183	0.373727	No
T303_07250	1.24415	0.315162	0.207445	0.373727	No
T303_02580	0.679005	-0.558507	0.210203	0.378188	No
T303_04955	0.861055	-0.215823	0.210533	0.378381	No
T303_03930	0.812222	-0.300054	0.211	0.378439	No
T303_05950	1.59726	0.6756	0.21243	0.380585	No
T303_04275	0.840584	-0.250536	0.213382	0.381487	No
T303_07690	0.833753	-0.262308	0.214137	0.382268	No
T303_05745	1.33195	0.413536	0.214375	0.382268	No
T303_03200	0.726956	-0.46006	0.214492	0.382268	No
T303_02450	1.24254	0.313291	0.216506	0.385051	No
T303_08315	0.864538	-0.209999	0.216767	0.385057	No
T303_08955	1.52797	0.611618	0.217188	0.385057	No
T303_06740	0.661795	-0.595544	0.220473	0.389698	No
T303_06030	0.804636	-0.313592	0.222703	0.392643	No
T303_07610	0.821814	-0.283117	0.222851	0.392643	No
T303_06805	1.58283	0.662504	0.223448	0.393288	No
T303_05565	1.38324	0.468047	0.22409	0.393533	No
T303_08230	1.51393	0.598301	0.224563	0.393533	No
T303_00865	1.64181	0.715291	0.224615	0.393533	No
T303_01435	1.31867	0.399085	0.224744	0.393533	No
T303_09845	0.685025	-0.545772	0.225796	0.394563	No
T303_00110	0.798739	-0.324204	0.226337	0.394966	No
T303_03695	0.842458	-0.247323	0.230192	0.39949	No
T303_00650	0.694904	-0.525114	0.230236	0.39949	No
T303_08185	0.799384	-0.323039	0.230258	0.39949	No
T303_01985	0.805299	-0.312404	0.231165	0.400655	No
T303_03915	1.80989	0.855906	0.235166	0.407175	No
T303_08120	1.23604	0.30572	0.236488	0.409047	No
T303_05795	1.90879	0.932659	0.236897	0.409339	No
T303_01690	0.664098	-0.590533	0.238292	0.410914	No
T303_01080	0.786901	-0.345747	0.238721	0.411237	No
T303_07910	1.29951	0.377963	0.239266	0.411761	No
T303_01600	1.44194	0.528016	0.242474	0.415694	No
T303_00240	2.14607	1.1017	0.24248	0.415694	No
T303_09355	0.856853	-0.22288	0.242529	0.415694	No
T303_01680	0.841881	-0.248311	0.244435	0.417163	No
T303_07800	0.717806	-0.478335	0.244699	0.417163	No
T303_02470	0.69305	-0.528969	0.244857	0.417163	No
T303_06430	1.27627	0.351929	0.249499	0.42314	No
T303_02615	0.741251	-0.431966	0.249608	0.42314	No
T303_07790	0.775036	-0.367665	0.250709	0.424583	No
T303_06155	1.4755	0.561208	0.251138	0.424753	No
T303_04925	0.670818	-0.576008	0.251308	0.424753	No
T303_03270	1.26626	0.340575	0.254579	0.429854	No
T303_08670	1.17294	0.230123	0.255403	0.430819	No
T303_09290	1.41892	0.504795	0.262242	0.440174	No
T303_01700	1.16227	0.21694	0.265036	0.443988	No
T303_00525	1.39494	0.480201	0.266943	0.446562	No
T303_06065	1.32775	0.408982	0.267196	0.446562	No
T303_02270	1.28412	0.360778	0.267616	0.446562	No
T303_08635	1.27807	0.353968	0.268098	0.446562	No
T303_09740	1.3618	0.445512	0.268147	0.446562	No
T303_00635	1.15932	0.213284	0.268595	0.44687	No
T303_01135	0.723886	-0.466165	0.2696	0.447668	No
T303_02520	1.21019	0.275234	0.270555	0.448815	No
T303_08875	0.885732	-0.175057	0.272212	0.451104	No
T303_08395	1.17368	0.231043	0.27273	0.451104	No
T303_05905	1.44986	0.535911	0.273838	0.452071	No
T303_01840	1.3892	0.474257	0.273846	0.452071	No
T303_05980	1.38957	0.474635	0.277377	0.456572	No
T303_04365	0.86627	-0.207111	0.277892	0.456978	No
T303_00095	0.836119	-0.25822	0.278725	0.457463	No
T303_00280	1.16543	0.220856	0.281686	0.461022	No
T303_06405	0.801512	-0.319205	0.281706	0.461022	No
T303_00180	0.835483	-0.259317	0.282087	0.461203	No
T303_02405	1.15948	0.213474	0.283875	0.463079	No
T303_04520	0.797111	-0.327148	0.284425	0.463164	No
T303_02620	0.768652	-0.379597	0.284647	0.463164	No
T303_05380	1.35188	0.434967	0.288825	0.469065	No
T303_08800	1.15754	0.211061	0.289306	0.469398	No
T303_03950	0.737601	-0.439088	0.291028	0.471294	No
T303_08150	1.17407	0.231513	0.29201	0.471748	No
T303_04760	1.58308	0.662734	0.294961	0.475851	No
T303_06870	0.717325	-0.479301	0.295579	0.476397	No
T303_07335	1.13959	0.188517	0.298515	0.479549	No
T303_03405	0.556063	-0.84668	0.298943	0.479549	No
T303_07435	1.227	0.29514	0.301755	0.483603	No
T303_08500	0.807791	-0.307946	0.302061	0.483639	No
T303_03685	0.730614	-0.452819	0.302805	0.484291	No
T303_07205	0.889374	-0.169137	0.304422	0.485591	No
T303_06705	1.16474	0.22001	0.306283	0.487744	No
T303_01145	1.12894	0.174965	0.307188	0.48863	No
T303_06285	0.748105	-0.418687	0.307513	0.48869	No
T303_01570	0.845936	-0.24138	0.308646	0.490033	No
T303_00330	1.40754	0.493179	0.310963	0.49192	No
T303_04690	0.879683	-0.184944	0.311036	0.49192	No
T303_04750	1.81848	0.86273	0.311856	0.492312	No
T303_08435	0.874302	-0.193796	0.312575	0.492312	No
T303_06015	0.824405	-0.278575	0.312685	0.492312	No
T303_05850	1.35367	0.436877	0.313458	0.493074	No
T303_05450	1.42136	0.507274	0.314092	0.493615	No
T303_06685	0.831692	-0.265879	0.316968	0.496758	No
T303_09030	1.37028	0.454467	0.317874	0.497262	No
T303_05110	1.46673	0.552603	0.318926	0.497993	No
T303_01930	0.771782	-0.373735	0.322207	0.502239	No
T303_02495	0.822533	-0.281854	0.322236	0.502239	No
T303_08690	0.693471	-0.528092	0.322531	0.502239	No
T303_08280	0.561595	-0.832398	0.323185	0.502727	No
T303_01010	0.872519	-0.196741	0.32373	0.502727	No
T303_04935	1.18255	0.241901	0.327035	0.506887	No
T303_05715	0.791895	-0.336619	0.327302	0.506887	No
T303_08775	1.30398	0.382924	0.327789	0.506956	No
T303_05370	1.18337	0.242902	0.327943	0.506956	No
T303_04810	1.20733	0.271815	0.329823	0.507885	No
T303_03460	0.848788	-0.236524	0.330544	0.508207	No
T303_04745	1.31992	0.400453	0.333559	0.511458	No
T303_03410	0.674479	-0.568154	0.334108	0.511837	No
T303_04470	1.32071	0.40131	0.335287	0.513182	No
T303_04370	0.878928	-0.186183	0.338677	0.517905	No
T303_08140	1.19575	0.257916	0.340639	0.519505	No
T303_03150	0.592281	-0.755646	0.341256	0.51998	No
T303_02340	1.16883	0.225062	0.34286	0.521025	No
T303_07625	1.14035	0.189483	0.343829	0.521566	No
T303_06750	0.851393	-0.232102	0.344182	0.521637	No
T303_01685	0.792227	-0.336015	0.344592	0.521793	No
T303_05080	1.28815	0.365303	0.346326	0.523953	No
T303_04335	0.81695	-0.29168	0.348805	0.525881	No
T303_05755	1.2152	0.281198	0.3512	0.528508	No
T303_08495	0.83532	-0.2596	0.353362	0.530355	No
T303_05145	1.27109	0.346061	0.35623	0.53258	No
T303_09000	1.25243	0.324735	0.358939	0.535048	No
T303_02550	1.19995	0.262972	0.359004	0.535048	No
T303_08890	0.874311	-0.193781	0.361599	0.537667	No
T303_05125	1.20036	0.263462	0.361709	0.537667	No
T303_03715	0.863798	-0.211235	0.362571	0.537765	No
T303_00955	0.837178	-0.256394	0.362618	0.537765	No
T303_01130	0.869882	-0.201108	0.362723	0.537765	No
T303_07090	0.835477	-0.259327	0.364997	0.540666	No
T303_05095	1.5494	0.631706	0.366058	0.541766	No
T303_00200	0.816572	-0.292348	0.366441	0.541862	No
T303_06810	1.45018	0.536234	0.366976	0.542182	No
T303_06490	0.771097	-0.375016	0.371157	0.546461	No
T303_03885	1.50645	0.591153	0.371805	0.546837	No
T303_07665	1.18908	0.249843	0.372055	0.546837	No
T303_03680	0.777891	-0.362361	0.372926	0.547471	No
T303_07540	1.50373	0.58855	0.37313	0.547471	No
T303_06320	1.24161	0.312208	0.37351	0.547557	No
T303_01800	1.21874	0.285392	0.375141	0.549003	No
T303_07490	0.795432	-0.33019	0.375829	0.549537	No
T303_04830	0.846125	-0.241057	0.377267	0.551166	No
T303_04270	0.860083	-0.217452	0.378441	0.551938	No
T303_02880	0.888789	-0.170087	0.378931	0.551938	No
T303_02600	0.785769	-0.347822	0.37909	0.551938	No
T303_09055	0.8832	-0.179188	0.379092	0.551938	No
T303_03035	1.11971	0.163129	0.384001	0.556703	No
T303_08785	1.28625	0.363173	0.38555	0.557999	No
T303_06135	1.31681	0.397049	0.391317	0.564232	No
T303_09665	1.1918	0.253137	0.391515	0.564232	No
T303_09345	0.886384	-0.173996	0.394544	0.566517	No
T303_09230	1.30361	0.382509	0.394765	0.566517	No
T303_08770	1.2313	0.300184	0.396007	0.567718	No
T303_01455	0.842812	-0.246717	0.398599	0.569465	No
T303_06775	1.11151	0.152526	0.399269	0.569619	No
T303_01770	1.18526	0.245209	0.401646	0.572223	No
T303_09685	1.18814	0.248705	0.402163	0.572223	No
T303_04135	1.16124	0.215662	0.404699	0.574477	No
T303_06035	0.853565	-0.228427	0.405444	0.575055	No
T303_02285	1.12592	0.171101	0.407387	0.577164	No
T303_03365	1.44221	0.528279	0.407609	0.577164	No
T303_08655	1.13196	0.178828	0.407998	0.577235	No
T303_03610	0.854524	-0.226808	0.408519	0.577491	No
T303_00445	0.814789	-0.295502	0.410872	0.580335	No
T303_02610	0.820551	-0.285336	0.413399	0.583421	No
T303_09600	1.23781	0.307789	0.414624	0.584665	No
T303_07060	0.834187	-0.261557	0.416862	0.586848	No
T303_01660	0.884933	-0.17636	0.418147	0.587707	No
T303_03550	0.900869	-0.15061	0.418644	0.587707	No
T303_01100	1.10703	0.146693	0.419095	0.587707	No
T303_09065	1.10598	0.145321	0.419199	0.587707	No
T303_05050	0.624939	-0.678214	0.421288	0.590151	No
T303_03665	1.72445	0.78614	0.422657	0.591581	No
T303_01480	0.696467	-0.521873	0.423567	0.591881	No
T303_01885	1.62338	0.698997	0.431033	0.600834	No
T303_05600	0.907662	-0.139772	0.432858	0.601495	No
T303_04675	1.27274	0.347938	0.433123	0.601495	No
T303_07410	0.830747	-0.267519	0.433185	0.601495	No
T303_09340	0.893212	-0.162926	0.433209	0.601495	No
T303_00010	0.881817	-0.181449	0.433844	0.601495	No
T303_02060	0.841407	-0.249125	0.433905	0.601495	No
T303_06875	0.809823	-0.304322	0.433981	0.601495	No
T303_02415	1.99455	0.996064	0.435129	0.602595	No
T303_07570	1.1954	0.257489	0.435654	0.602832	No
T303_07675	1.20839	0.273086	0.436153	0.603032	No
T303_04755	1.76762	0.821804	0.437655	0.604618	No
T303_03265	0.891656	-0.165441	0.440403	0.607428	No
T303_03740	0.86907	-0.202456	0.443001	0.608478	No
T303_05620	0.906702	-0.1413	0.443074	0.608478	No
T303_03045	1.1651	0.220453	0.44331	0.608478	No
T303_02430	0.856164	-0.224041	0.443681	0.608497	No
T303_04515	0.80752	-0.308431	0.445881	0.610849	No
T303_05870	1.15076	0.20259	0.446114	0.610849	No
T303_04360	0.910098	-0.135906	0.446667	0.611116	No
T303_06920	1.13294	0.180075	0.447863	0.61226	No
T303_08550	1.1794	0.238057	0.449439	0.613378	No
T303_00015	0.882681	-0.180036	0.449793	0.613378	No
T303_00510	1.24797	0.31958	0.450228	0.613378	No
T303_05090	1.45576	0.541769	0.450591	0.613378	No
T303_09185	0.90325	-0.146803	0.450844	0.613378	No
T303_07135	1.16378	0.21882	0.452382	0.61498	No
T303_06480	1.24389	0.314857	0.455505	0.618237	No
T303_02070	1.10145	0.139407	0.457146	0.618864	No
T303_02390	0.880237	-0.184036	0.457782	0.618864	No
T303_05180	0.770572	-0.375999	0.457785	0.618864	No
T303_06045	0.853284	-0.228901	0.459005	0.620021	No
T303_04025	0.860806	-0.216239	0.461569	0.622496	No
T303_05060	1.26625	0.340565	0.46319	0.624188	No
T303_04405	0.90529	-0.143548	0.465132	0.626309	No
T303_08525	0.866376	-0.206934	0.466628	0.627544	No
T303_05150	1.22713	0.295287	0.466786	0.627544	No
T303_06170	1.22114	0.288233	0.467721	0.628304	No
T303_03745	0.72981	-0.454407	0.468622	0.628399	No
T303_07500	0.859201	-0.218932	0.468897	0.628399	No
T303_01020	0.912929	-0.131425	0.468899	0.628399	No
T303_06040	0.86154	-0.21501	0.470175	0.629201	No
T303_08380	1.10664	0.146181	0.470303	0.629201	No
T303_09755	1.43528	0.521335	0.470607	0.629201	No
T303_07000	1.10888	0.149105	0.47121	0.629512	No
T303_01710	0.917308	-0.124522	0.471694	0.629665	No
T303_09885	0.71473	-0.48453	0.472419	0.630138	No
T303_01445	0.84858	-0.236877	0.474332	0.6317	No
T303_07515	1.51128	0.59577	0.479464	0.637374	No
T303_05100	1.52337	0.607264	0.479464	0.637374	No
T303_00170	1.72722	0.788456	0.480758	0.638261	No
T303_05875	1.14338	0.193306	0.484018	0.642087	No
T303_04055	1.10914	0.149443	0.48791	0.645876	No
T303_04720	0.853669	-0.228252	0.488012	0.645876	No
T303_04540	1.21913	0.285847	0.491399	0.649854	No
T303_03705	0.929078	-0.106128	0.492237	0.650057	No
T303_04310	1.08523	0.118006	0.492317	0.650057	No
T303_01795	1.29732	0.375533	0.494563	0.652517	No
T303_02265	1.12113	0.164953	0.495915	0.653793	No
T303_09430	0.895278	-0.159593	0.497906	0.655623	No
T303_04115	1.22483	0.292576	0.498159	0.655623	No
T303_08780	1.18479	0.244635	0.498459	0.655623	No
T303_07965	1.10517	0.144269	0.499036	0.655876	No
T303_06765	1.0881	0.121811	0.500102	0.65671	No
T303_05880	1.13699	0.185214	0.500527	0.65671	No
T303_00980	1.54081	0.623687	0.501343	0.65671	No
T303_05615	0.924443	-0.113344	0.5016	0.65671	No
T303_02310	0.868918	-0.202709	0.502981	0.657891	No
T303_09615	0.83579	-0.258787	0.503275	0.657891	No
T303_04600	0.894664	-0.160582	0.510319	0.666136	No
T303_00985	1.61353	0.690221	0.510417	0.666136	No
T303_09690	0.895607	-0.159062	0.51121	0.666136	No
T303_09555	1.22222	0.289501	0.511438	0.666136	No
T303_00160	1.70851	0.772737	0.51154	0.666136	No
T303_07985	1.07336	0.102132	0.513253	0.667857	No
T303_03670	0.762691	-0.390829	0.514936	0.669024	No
T303_01915	0.859803	-0.217922	0.520545	0.67528	No
T303_04325	0.855301	-0.225497	0.521491	0.675308	No
T303_06790	0.928545	-0.106956	0.521513	0.675308	No
T303_05800	1.12963	0.175852	0.52363	0.677218	No
T303_03690	0.830803	-0.267422	0.524847	0.677939	No
T303_07595	1.12916	0.175254	0.525205	0.677939	No
T303_06020	1.10368	0.142317	0.525917	0.677939	No
T303_07590	1.11721	0.159897	0.526456	0.677939	No
T303_03870	0.900306	-0.151513	0.526603	0.677939	No
T303_05075	1.12133	0.165214	0.528023	0.67857	No
T303_00190	0.927855	-0.108029	0.528264	0.67857	No
T303_08125	1.48107	0.56664	0.529468	0.679604	No
T303_07615	1.11488	0.156885	0.530056	0.679695	No
T303_08605	1.103	0.141433	0.531049	0.679695	No
T303_01005	0.923315	-0.115104	0.532274	0.679695	No
T303_01585	0.890141	-0.167895	0.536522	0.682992	No
T303_09400	0.866409	-0.206879	0.538088	0.684474	No
T303_03805	1.16249	0.217219	0.538535	0.68453	No
T303_06327	1.19554	0.25766	0.540776	0.686282	No
T303_09385	0.928197	-0.107496	0.541247	0.686282	No
T303_03175	1.10927	0.149609	0.54135	0.686282	No
T303_09605	1.09519	0.131177	0.541526	0.686282	No
T303_09855	1.15049	0.202245	0.546408	0.690926	No
T303_06815	1.16387	0.218933	0.547724	0.691984	No
T303_05585	0.919544	-0.121009	0.548058	0.691984	No
T303_05230	1.25026	0.322228	0.551174	0.695403	No
T303_08310	0.933688	-0.0989878	0.553176	0.697166	No
T303_06395	0.889474	-0.168976	0.554882	0.698527	No
T303_00210	1.22856	0.296966	0.558348	0.700818	No
T303_07095	0.831558	-0.266111	0.560503	0.702529	No
T303_01295	1.24947	0.321312	0.561674	0.703219	No
T303_06130	1.22699	0.295126	0.561915	0.703219	No
T303_02280	1.11109	0.151982	0.568416	0.70979	No
T303_03040	1.11638	0.158823	0.569006	0.710006	No
T303_01105	1.10194	0.140047	0.571657	0.712791	No
T303_05525	0.862316	-0.213711	0.576998	0.717874	No
T303_00945	0.901063	-0.1503	0.580367	0.721538	No
T303_00165	1.56515	0.646302	0.581347	0.722228	No
T303_05120	1.09786	0.134689	0.582749	0.723442	No
T303_06800	1.06778	0.0946156	0.583976	0.724437	No
T303_04225	1.11253	0.153843	0.585467	0.725757	No
T303_02700	1.26122	0.334819	0.589076	0.727054	No
T303_05055	1.43516	0.521216	0.590962	0.728853	No
T303_09510	1.08255	0.11444	0.594504	0.732383	No
T303_07895	1.11047	0.151169	0.594685	0.732383	No
T303_09455	1.13979	0.188767	0.596302	0.733762	No
T303_07945	0.879551	-0.185161	0.596667	0.733762	No
T303_01835	0.931857	-0.101819	0.598851	0.735917	No
T303_09810	1.06078	0.0851284	0.602434	0.739753	No
T303_00385	0.874885	-0.192835	0.602842	0.739753	No
T303_09270	0.722136	-0.469657	0.603923	0.740545	No
T303_01670	0.901906	-0.14895	0.604756	0.740561	No
T303_06930	1.0904	0.124855	0.605386	0.740739	No
T303_02015	1.07971	0.110645	0.608798	0.743844	No
T303_02575	0.885969	-0.174671	0.610561	0.745463	No
T303_09260	1.12728	0.172849	0.615906	0.750511	No
T303_09060	0.933642	-0.0990591	0.618435	0.752347	No
T303_01165	1.09624	0.132558	0.618505	0.752347	No
T303_01325	1.10479	0.143768	0.618852	0.752347	No
T303_05960	1.09326	0.12864	0.621221	0.754688	No
T303_01595	1.09816	0.135085	0.62169	0.754719	No
T303_04670	1.19686	0.259256	0.62229	0.754909	No
T303_00720	1.2859	0.362775	0.624032	0.756483	No
T303_08895	1.11711	0.159771	0.625438	0.757649	No
T303_03380	1.07468	0.103903	0.625946	0.757724	No
T303_06905	0.919299	-0.121394	0.626848	0.758277	No
T303_02110	1.276	0.351633	0.627744	0.758821	No
T303_02115	1.17211	0.229114	0.631795	0.761618	No
T303_05340	1.12745	0.173059	0.632219	0.761618	No
T303_07970	0.946733	-0.07897	0.632369	0.761618	No
T303_05355	0.934646	-0.0975086	0.632743	0.761618	No
T303_00135	1.18265	0.242017	0.635436	0.763779	No
T303_05065	1.38507	0.469956	0.640274	0.768509	No
T303_09625	1.15489	0.20776	0.642749	0.770937	No
T303_05285	1.05045	0.0710025	0.645549	0.773206	No
T303_00195	1.05643	0.0791946	0.646784	0.774139	No
T303_05695	0.924813	-0.112766	0.650121	0.777587	No
T303_09350	1.0667	0.0931545	0.652056	0.778806	No
T303_08235	0.944838	-0.0818612	0.654534	0.781218	No
T303_04545	1.07405	0.103065	0.657582	0.784305	No
T303_03325	1.06045	0.0846739	0.659595	0.785783	No
T303_00395	0.908122	-0.139042	0.659744	0.785783	No
T303_03030	0.816204	-0.292999	0.660797	0.785938	No
T303_06535	1.0756	0.105136	0.661695	0.786038	No
T303_07235	0.940502	-0.0884971	0.662267	0.786038	No
T303_04840	1.13846	0.187083	0.663113	0.786494	No
T303_04575	1.10818	0.148195	0.664856	0.787019	No
T303_08850	1.11898	0.162179	0.664943	0.787019	No
T303_02100	0.87991	-0.184572	0.668911	0.789858	No
T303_06326	0.88611	-0.174442	0.66931	0.789858	No
T303_08805	0.923109	-0.115427	0.669695	0.789858	No
T303_01630	1.07875	0.109365	0.670412	0.789858	No
T303_01375	1.08439	0.11689	0.671055	0.789858	No
T303_00065	1.06184	0.0865604	0.673157	0.791185	No
T303_05385	1.20343	0.267148	0.673449	0.791185	No
T303_07380	0.898415	-0.154546	0.673576	0.791185	No
T303_02535	0.921286	-0.118279	0.676645	0.794241	No
T303_01775	0.924764	-0.112843	0.679293	0.795149	No
T303_02500	0.930548	-0.103848	0.67931	0.795149	No
T303_00685	0.866505	-0.20672	0.680165	0.795149	No
T303_08900	0.87882	-0.18636	0.683471	0.796601	No
T303_08760	1.10524	0.144364	0.686923	0.799688	No
T303_01175	1.11382	0.155522	0.688169	0.800256	No
T303_08870	0.95816	-0.0616618	0.688351	0.800256	No
T303_02485	0.905493	-0.143225	0.691417	0.802723	No
T303_06025	1.05522	0.0775458	0.692854	0.803396	No
T303_06140	1.12247	0.166673	0.692941	0.803396	No
T303_01140	1.05618	0.0788565	0.696857	0.806716	No
T303_07770	1.05904	0.0827576	0.697226	0.806716	No
T303_05190	1.2038	0.267593	0.697934	0.806986	No
T303_00695	0.923095	-0.115448	0.700441	0.809336	No
T303_02130	1.09788	0.134718	0.70188	0.810448	No
T303_03600	0.911768	-0.133262	0.70242	0.810521	No
T303_02695	1.17244	0.229518	0.704121	0.811933	No
T303_04645	1.16671	0.222446	0.708696	0.815	No
T303_09610	1.11134	0.152305	0.709442	0.815307	No
T303_05700	0.922289	-0.116709	0.710291	0.815733	No
T303_08155	1.04651	0.0655906	0.715123	0.820413	No
T303_02920	1.05742	0.0805447	0.715331	0.820413	No
T303_01705	1.05177	0.0728198	0.715879	0.820489	No
T303_02690	1.14057	0.189761	0.717643	0.821701	No
T303_04740	1.04593	0.0647925	0.718421	0.821701	No
T303_08855	0.900675	-0.150921	0.727635	0.83005	No
T303_08240	0.887369	-0.172394	0.72838	0.830343	No
T303_01000	1.04875	0.068666	0.730593	0.832309	No
T303_09160	0.955837	-0.0651637	0.733167	0.834682	No
T303_01925	0.912658	-0.131854	0.734689	0.835856	No
T303_06125	0.89764	-0.155791	0.736748	0.837639	No
T303_02530	1.04886	0.0688216	0.744514	0.843534	No
T303_08320	1.03779	0.0535157	0.74457	0.843534	No
T303_04800	1.04742	0.0668352	0.745287	0.843534	No
T303_05005	0.952417	-0.0703346	0.745403	0.843534	No
T303_05675	1.06277	0.0878308	0.746714	0.844281	No
T303_06585	1.0572	0.08025	0.748006	0.844281	No
T303_05270	1.03942	0.055784	0.748047	0.844281	No
T303_09645	0.96195	-0.0559669	0.758425	0.853137	No
T303_09630	1.09977	0.137196	0.760373	0.853665	No
T303_05760	1.0473	0.066675	0.762255	0.854865	No
T303_02040	1.11813	0.161085	0.762447	0.854865	No
T303_02925	1.08378	0.116071	0.765113	0.857175	No
T303_02035	1.13388	0.181273	0.767367	0.858684	No
T303_04680	1.06059	0.0848628	0.769286	0.860266	No
T303_02965	0.959609	-0.0594807	0.771989	0.862722	No
T303_01045	1.04888	0.0688503	0.775301	0.865855	No
T303_08180	0.939099	-0.0906509	0.775852	0.865902	No
T303_09800	0.96033	-0.0583981	0.783213	0.8724	No
T303_07190	0.959548	-0.0595737	0.786782	0.875231	No
T303_09750	0.912958	-0.131379	0.788878	0.876786	No
T303_04415	0.965606	-0.0504929	0.791407	0.878233	No
T303_00070	0.966439	-0.0492492	0.791545	0.878233	No
T303_07125	1.09434	0.130067	0.792358	0.878562	No
T303_02680	1.04902	0.0690461	0.79317	0.878891	No
T303_02480	0.94634	-0.0795702	0.795914	0.881356	No
T303_01120	0.965785	-0.0502259	0.797306	0.882325	No
T303_06795	0.966411	-0.0492905	0.799003	0.883054	No
T303_02120	1.05106	0.0718386	0.800408	0.884033	No
T303_04020	1.05591	0.0784863	0.803442	0.886467	No
T303_01280	0.888181	-0.171074	0.808581	0.891324	No
T303_06250	0.93744	-0.0932013	0.811252	0.89369	No
T303_05455	1.07571	0.105283	0.813648	0.895741	No
T303_06605	1.03301	0.0468495	0.815989	0.897166	No
T303_09725	0.954882	-0.066606	0.818975	0.89849	No
T303_04215	0.956111	-0.0647495	0.819304	0.89849	No
T303_04535	0.971428	-0.0418215	0.820575	0.899303	No
T303_01270	1.22814	0.29648	0.821575	0.89982	No
T303_04220	1.04809	0.0677588	0.823413	0.90094	No
T303_06000	0.971222	-0.0421266	0.824314	0.90094	No
T303_06530	1.03499	0.0496206	0.824582	0.90094	No
T303_06735	0.944823	-0.0818841	0.825209	0.90094	No
T303_04940	1.03002	0.0426707	0.825244	0.90094	No
T303_00355	1.08915	0.123199	0.828971	0.904235	No
T303_00410	1.03306	0.0469268	0.829368	0.904235	No
T303_07400	1.02461	0.0350762	0.829856	0.904235	No
T303_00415	1.09043	0.124891	0.832585	0.906049	No
T303_03750	0.93486	-0.0971782	0.837733	0.909905	No
T303_00075	1.03136	0.0445524	0.842148	0.912993	No
T303_05000	0.921483	-0.117971	0.842269	0.912993	No
T303_07710	1.06118	0.0856706	0.842989	0.912993	No
T303_05465	0.952407	-0.0703493	0.845307	0.914585	No
T303_00360	1.06185	0.0865782	0.845803	0.914585	No
T303_00130	0.954217	-0.0676112	0.849267	0.917165	No
T303_02145	1.06887	0.0960839	0.852572	0.920093	No
T303_06525	1.02455	0.034992	0.853252	0.920093	No
T303_07655	1.02589	0.0368813	0.8536	0.920093	No
T303_00435	1.02652	0.03776	0.855857	0.921847	No
T303_08255	0.961449	-0.0567179	0.858431	0.922684	No
T303_04965	1.02543	0.0362293	0.858714	0.922684	No
T303_02685	1.0591	0.0828349	0.860045	0.92353	No
T303_04695	1.02304	0.0328595	0.861592	0.924608	No
T303_08630	1.02694	0.0383506	0.863274	0.92583	No
T303_04725	1.03223	0.0457648	0.86584	0.927943	No
T303_09325	1.03523	0.0499501	0.866334	0.927943	No
T303_08545	1.02819	0.0401123	0.869692	0.930498	No
T303_04870	0.979353	-0.0300988	0.873493	0.933262	No
T303_04410	1.02011	0.0287188	0.875475	0.934206	No
T303_09640	0.974143	-0.0377944	0.876542	0.934758	No
T303_05460	0.943622	-0.0837192	0.8786	0.936366	No
T303_03020	1.09493	0.130842	0.881711	0.938507	No
T303_01755	0.958765	-0.0607501	0.886341	0.942257	No
T303_03185	1.01899	0.0271463	0.889266	0.944776	No
T303_01790	0.973357	-0.0389595	0.890245	0.945226	No
T303_03770	0.968743	-0.0458135	0.891478	0.945945	No
T303_05335	0.942018	-0.0861727	0.893924	0.947949	No
T303_05655	1.0377	0.0533944	0.897042	0.948739	No
T303_04340	0.973954	-0.0380741	0.897453	0.948739	No
T303_04130	0.964257	-0.0525101	0.897912	0.948739	No
T303_05045	0.982848	-0.0249595	0.898742	0.948739	No
T303_09670	0.966991	-0.0484263	0.899128	0.948739	No
T303_04585	0.982417	-0.025593	0.901737	0.950902	No
T303_07940	0.974277	-0.0375957	0.904904	0.953196	No
T303_00665	1.0457	0.0644667	0.9052	0.953196	No
T303_08055	0.984636	-0.0223379	0.909051	0.954461	No
T303_04300	1.0148	0.0211955	0.909882	0.954461	No
T303_02170	0.984629	-0.0223474	0.910159	0.954461	No
T303_03990	1.01405	0.0201301	0.910963	0.954717	No
T303_03765	0.971591	-0.0415793	0.913032	0.95512	No
T303_02505	0.979944	-0.0292286	0.913908	0.95545	No
T303_03755	0.979703	-0.0295839	0.914494	0.955475	No
T303_07825	1.03079	0.0437568	0.917763	0.957874	No
T303_00050	1.03608	0.0511415	0.920242	0.959125	No
T303_01810	1.03064	0.0435469	0.921817	0.959592	No
T303_09540	0.978514	-0.0313349	0.923133	0.960124	No
T303_06935	1.01764	0.0252293	0.923457	0.960124	No
T303_00800	0.987352	-0.0183637	0.925696	0.961865	No
T303_05680	1.01268	0.0181768	0.926897	0.962245	No
T303_00835	1.02278	0.0324996	0.928965	0.963497	No
T303_09210	0.963167	-0.0541415	0.931361	0.964806	No
T303_00775	0.979852	-0.0293638	0.932456	0.965148	No
T303_04635	0.94765	-0.0775738	0.932826	0.965148	No
T303_08375	0.988643	-0.0164789	0.933802	0.965296	No
T303_07030	0.981476	-0.0269754	0.934674	0.9653	No
T303_09825	1.01139	0.0163433	0.936998	0.966528	No
T303_08885	0.989853	-0.0147141	0.937841	0.966811	No
T303_00765	0.988743	-0.0163318	0.941587	0.967946	No
T303_05265	1.0087	0.012504	0.942701	0.967946	No
T303_07785	1.00934	0.013416	0.942857	0.967946	No
T303_07035	0.987331	-0.0183947	0.942923	0.967946	No
T303_07450	0.990036	-0.0144465	0.94625	0.969765	No
T303_03315	1.01554	0.0222432	0.946404	0.969765	No
T303_06495	1.0142	0.0203449	0.947476	0.969887	No
T303_09150	0.990083	-0.014379	0.947663	0.969887	No
T303_05115	1.01427	0.0204467	0.949147	0.970239	No
T303_05275	0.990209	-0.0141944	0.951667	0.972231	No
T303_02715	1.00869	0.0124803	0.953153	0.972259	No
T303_06325	1.0126	0.0180641	0.953408	0.972259	No
T303_06175	1.01307	0.0187297	0.953981	0.972261	No
T303_07040	0.989098	-0.0158144	0.956215	0.973456	No
T303_01750	1.01717	0.0245604	0.956609	0.973456	No
T303_05030	1.00991	0.0142317	0.95687	0.973456	No
T303_00365	0.979859	-0.029354	0.958352	0.973793	No
T303_00920	1.01159	0.0166245	0.958562	0.973793	No
T303_00995	0.991131	-0.0128522	0.958917	0.973793	No
T303_05215	1.00905	0.012992	0.960342	0.974078	No
T303_09285	1.03108	0.0441559	0.963335	0.97604	No
T303_01560	1.01433	0.020528	0.965594	0.977657	No
T303_06420	1.00707	0.010166	0.9671	0.978293	No
T303_00990	1.01024	0.0146953	0.967372	0.978293	No
T303_00670	0.990255	-0.0141285	0.9705	0.980873	No
T303_02125	1.01465	0.0209819	0.972659	0.981705	No
T303_07025	1.00679	0.00976918	0.973588	0.981705	No
T303_02510	1.00507	0.00730302	0.977986	0.98493	No
T303_03415	0.993073	-0.0100285	0.979831	0.986204	No
T303_04715	1.01172	0.0168108	0.981088	0.986303	No
T303_08390	0.99665	-0.00484141	0.981996	0.986634	No
T303_09535	1.00373	0.00537369	0.984986	0.989054	No
T303_02175	1.00254	0.00365669	0.986958	0.99045	No
T303_00805	1.00153	0.00221066	0.993238	0.996164	No
T303_09675	0.998461	-0.00222238	0.994219	0.996166	No
T303_07960	1.00134	0.00193031	0.99441	0.996166	No
T303_06945	1.00142	0.00205391	0.995437	0.996608	No
T303_01715	1.00021	0.000304824	0.999186	0.999186	No

## Sheet: Cd3 vs Cd1
Locus_tag	Fold change	Log2 fold-change	p-value	q-value (adjusted p-value)	DEGs (based on q-value)	Detected in Proteome	Proteome_Log2_FCmedian
T303_01945	0.106075	-3.23684	6.00535e-06	0.00417659	Down	Yes	-2.10714
T303_03440	8.83739	3.14362	2.10119e-05	0.00417659	Up	Yes	0.76473
T303_05420	19.731	4.30239	1.74745e-05	0.00417659	Up	Yes	0.833816
T303_02630	3.02139	1.59521	3.61638e-05	0.00437928	Up	Yes	0.991067
T303_05965	2.79564	1.48318	3.47145e-05	0.00437928	Up	Yes	1.56642
T303_01040	0.211371	-2.24215	7.40832e-05	0.0048496	Down	Yes	-1.94334
T303_03435	10.4447	3.38469	6.73665e-05	0.0048496	Up	Yes	0.455901
T303_05425	17.3443	4.11639	8.4367e-05	0.00518334	Up	Yes	1.75407
T303_09095	3.6438	1.86544	8.52723e-05	0.00518334	Up	Yes	-1.34269
T303_01085	0.332802	-1.58726	0.000107931	0.00592574	Down	Yes	0.239776
T303_08595	0.454615	-1.13728	0.000116389	0.00608411	Down	Yes	-0.126096
T303_02635	2.85082	1.51138	0.000134334	0.00672461	Up	Yes	-1.25595
T303_03710	0.457386	-1.12852	0.000167274	0.00780444	Down	Yes	-0.425333
T303_01310	0.346862	-1.52757	0.00018918	0.00782961	Down	Yes	-1.30488
T303_02155	2.14336	1.09987	0.000187494	0.00782961	Up	Yes	0.281217
T303_04565	0.454176	-1.13868	0.000211332	0.00817471	Down	Yes	-0.357335
T303_00020	20.301	4.34348	0.000219245	0.00829234	Up	Yes	0.00400271
T303_08020	0.453811	-1.13984	0.000241167	0.00892317	Down	Yes	0.0649966
T303_03630	1.99782	0.998428	0.000271434	0.00942819	Up	Yes	-0.755009
T303_08905	5.56084	2.4753	0.000267806	0.00942819	Up	Yes	0.579379
T303_03430	11.4573	3.5182	0.000319152	0.00979831	Up	Yes	0.0512383
T303_08455	0.413811	-1.27296	0.00033258	0.00979831	Down	Yes	-0.911484
T303_07855	0.494353	-1.01639	0.000343857	0.00982815	Down	Yes	-0.243673
T303_01475	0.418684	-1.25607	0.000377748	0.0100457	Down	Yes	-0.45081
T303_03635	2.25581	1.17365	0.000376858	0.0100457	Up	Yes	-0.958972
T303_09840	3.34395	1.74155	0.000420927	0.0101271	Up	Yes	3.50979
T303_08720	4.90808	2.29516	0.000462064	0.0107165	Up	Yes	0.49746
T303_04170	19.4576	4.28226	0.000495211	0.0109461	Up	Yes	1.73471
T303_08290	5.75343	2.52442	0.000519056	0.0110429	Up	Yes	0.234529
T303_00780	2.77618	1.4731	0.000580108	0.0110995	Up	Yes	0.795856
T303_03640	2.23356	1.15935	0.000614809	0.0110995	Up	Yes	-0.318555
T303_05660	0.502454	-0.992936	0.000535357	0.0110995	Down	Yes	0.84858
T303_06070	3.63665	1.86261	0.000575784	0.0110995	Up	Yes	0.178011
T303_08475	0.434627	-1.20215	0.000629134	0.0110995	Down	Yes	-0.538417
T303_09475	0.518143	-0.948577	0.000554965	0.0110995	Down	Yes	-0.515324
T303_09715	0.315462	-1.66446	0.000619247	0.0110995	Down	Yes	-1.27538
T303_03425	11.9994	3.58489	0.000751758	0.0120707	Up	Yes	1.49894
T303_04185	3.8367	1.93987	0.00109627	0.0155487	Up	Yes	-0.662196
T303_03485	2.02837	1.02032	0.00127508	0.0168473	Up	Yes	-0.0371074
T303_09710	0.247044	-2.01716	0.00127691	0.0168473	Down	Yes	-1.9267
T303_00950	0.423842	-1.2384	0.00129551	0.0169612	Down	Yes	-0.645282
T303_08465	0.44937	-1.15402	0.00153292	0.0182449	Down	Yes	-1.40719
T303_05255	0.537132	-0.89665	0.0015623	0.0183382	Down	Yes	-0.763263
T303_05330	0.378457	-1.4018	0.00166669	0.0186416	Down	Yes	-0.637566
T303_08300	26.7082	4.73921	0.00163841	0.0186416	Up	Yes	0.128939
T303_09085	2.51095	1.32823	0.00183793	0.0197985	Up	Yes	0.0670855
T303_00055	0.515848	-0.954982	0.00188791	0.0198762	Down	Yes	0.238462
T303_08960	0.539586	-0.890075	0.00187053	0.0198762	Down	Yes	-0.666111
T303_07385	0.601055	-0.734432	0.0019304	0.0199124	Down	Yes	-0.524118
T303_02225	0.535323	-0.901518	0.00198698	0.0203725	Down	Yes	-0.310268
T303_03050	0.452975	-1.1425	0.00203239	0.0207134	Down	Yes	-1.04527
T303_03660	0.536215	-0.899116	0.00212821	0.0213071	Down	Yes	-0.378456
T303_07275	0.119934	-3.05969	0.00223537	0.0218655	Down	Yes	-1.1071
T303_08665	0.446399	-1.1636	0.00221615	0.0218655	Down	Yes	-1.90938
T303_09105	1.98022	0.98566	0.00223439	0.0218655	Up	Yes	1.09076
T303_06445	2.7221	1.44472	0.00225353	0.0219172	Up	Yes	-0.0305138
T303_07930	0.508646	-0.975265	0.0022668	0.021921	Down	Yes	-0.337752
T303_00030	0.549174	-0.864665	0.00247667	0.0235491	Down	Yes	-1.23306
T303_03280	0.547162	-0.869961	0.00274071	0.0252145	Down	Yes	-0.27087
T303_03025	0.550511	-0.861155	0.00300517	0.0260341	Down	Yes	-0.307079
T303_09530	0.574394	-0.799888	0.00298471	0.0260341	Down	Yes	-0.699102
T303_02960	2.76372	1.46661	0.00307124	0.0264003	Up	Yes	-0.0915894
T303_00465	0.481701	-1.05379	0.00337437	0.0281529	Down	Yes	-0.439901
T303_05665	0.627652	-0.671962	0.00333991	0.0281529	Down	Yes	-0.474064
T303_03520	0.539997	-0.888977	0.00370588	0.0300353	Down	Yes	-0.284939
T303_00140	0.551657	-0.858158	0.00383354	0.0307768	Down	Yes	0.622545
T303_06080	3.43538	1.78047	0.00389825	0.0309537	Up	Yes	1.67921
T303_00655	1.69258	0.75922	0.00403987	0.0310386	Up	Yes	-0.0706745
T303_06620	0.631936	-0.66215	0.00402228	0.0310386	Down	Yes	-0.36831
T303_09480	0.559402	-0.838041	0.00423959	0.0319282	Down	Yes	-0.569947
T303_07300	2.59944	1.3782	0.0044447	0.0331793	Up	Yes	-0.376279
T303_03130	0.486595	-1.03921	0.00468805	0.0338147	Down	Yes	-1.50679
T303_09695	0.587793	-0.766619	0.00486692	0.0347572	Down	Yes	-0.704175
T303_05970	6.10394	2.60974	0.00512273	0.0354426	Up	Yes	1.96147
T303_03080	0.526301	-0.926039	0.00522289	0.0358634	Down	Yes	1.3953
T303_04795	0.61424	-0.703125	0.0053584	0.0366265	Down	Yes	0.683954
T303_03510	0.502617	-0.992469	0.00562787	0.0375102	Down	Yes	0.332438
T303_01940	1.631	0.705759	0.00573753	0.0378499	Up	Yes	0.133663
T303_08745	2.61788	1.3884	0.00580691	0.0381597	Up	Yes	0.619738
T303_01640	0.584843	-0.773879	0.00584664	0.038273	Down	Yes	-1.08959
T303_08060	0.56672	-0.819292	0.00589488	0.038441	Down	Yes	-0.318354
T303_04430	2.22995	1.15701	0.00601211	0.0387599	Up	Yes	-0.987229
T303_03505	0.477105	-1.06762	0.0060491	0.0388512	Down	Yes	-0.469204
T303_02915	0.590587	-0.759778	0.00621182	0.0395974	Down	Yes	0.670286
T303_01355	0.264342	-1.91952	0.00630626	0.0397926	Down	Yes	-1.82404
T303_02670	3.88721	1.95873	0.00633142	0.0397926	Up	Yes	-0.289837
T303_07165	0.605542	-0.723702	0.00633595	0.0397926	Down	Yes	-1.11617
T303_03530	0.597083	-0.743996	0.00649479	0.0400512	Down	Yes	-0.875824
T303_04265	0.533631	-0.906086	0.00648437	0.0400512	Down	Yes	-1.34852
T303_09525	1.57804	0.658134	0.00671666	0.040974	Up	Yes	-0.620229
T303_07160	0.610453	-0.712049	0.00683831	0.0410821	Down	Yes	-1.11868
T303_08305	20.6787	4.37007	0.00680363	0.0410821	Up	Yes	0.208544
T303_03525	0.578883	-0.788658	0.00720498	0.0422735	Down	Yes	-0.00183334
T303_07110	0.65869	-0.602328	0.00737803	0.0423338	Down	Yes	-0.157757
T303_00025	17.3883	4.12004	0.00755531	0.0427712	Up	Yes	-0.507802
T303_04530	1.81804	0.862382	0.00760894	0.0427712	Up	Yes	-0.622332
T303_04425	2.21273	1.14583	0.00771703	0.042878	Up	Yes	-2.76983
T303_04155	0.623271	-0.682069	0.00824709	0.0441401	Down	Yes	0.219385
T303_05590	0.628972	-0.668932	0.0081688	0.0441401	Down	Yes	-0.566996
T303_02660	3.0471	1.60744	0.00883408	0.0468399	Up	Yes	-0.918685
T303_09080	1.9754	0.982142	0.00903786	0.0476236	Up	Yes	0.13851
T303_02205	0.52499	-0.929637	0.00910505	0.0476824	Down	Yes	-0.0325574
T303_09075	1.76258	0.817687	0.00910238	0.0476824	Up	Yes	0.291201
T303_08040	0.668837	-0.580274	0.00939126	0.0484361	Down	Yes	0.239616
T303_07355	0.557483	-0.843	0.0103549	0.0518355	No	Yes	-0.986735
T303_09120	2.06472	1.04594	0.0104168	0.0518532	No	Yes	-1.16815
T303_01815	0.42315	-1.24076	0.0105034	0.0520226	No	Yes	0.300488
T303_03350	0.60009	-0.736749	0.0105228	0.0520226	No	Yes	-1.63374
T303_08195	0.56896	-0.813602	0.0105592	0.0520226	No	Yes	-0.550825
T303_00120	1.95212	0.965039	0.0107676	0.0526622	No	Yes	-0.166081
T303_00290	0.412418	-1.27782	0.0110839	0.0537458	No	Yes	-1.6994
T303_04005	1.75935	0.81504	0.01141	0.0551699	No	Yes	-0.0527202
T303_02200	0.563736	-0.826908	0.0116603	0.0557469	No	Yes	-0.164102
T303_02805	1.95945	0.970449	0.0118019	0.0560249	No	Yes	-0.215939
T303_09505	2.97645	1.57359	0.0119066	0.0561361	No	Yes	-0.481562
T303_08750	2.3525	1.2342	0.012246	0.0571433	No	Yes	-0.504841
T303_06885	0.610729	-0.711397	0.0129511	0.0594145	No	Yes	-0.710821
T303_00820	0.67213	-0.573187	0.0130984	0.0596082	No	Yes	0.134181
T303_06690	0.680977	-0.554321	0.0130869	0.0596082	No	Yes	-0.730121
T303_01350	0.301443	-1.73004	0.0133367	0.0603698	No	Yes	-0.0290351
T303_02910	0.669722	-0.578367	0.0135088	0.0609866	No	Yes	-0.706345
T303_00125	1.84218	0.881411	0.013621	0.0612145	No	Yes	-0.147492
T303_03515	0.538527	-0.89291	0.0136312	0.0612145	No	Yes	0.372685
T303_06515	2.35767	1.23736	0.0138357	0.0614841	No	Yes	-1.1391
T303_00100	0.693846	-0.527312	0.0141549	0.0625535	No	Yes	-0.950139
T303_05205	3.0535	1.61046	0.0142613	0.0625535	No	Yes	-0.623929
T303_03390	1.60124	0.67919	0.014587	0.0634964	No	Yes	-0.232274
T303_03720	0.524055	-0.932209	0.015046	0.0649959	No	Yes	-0.300666
T303_01935	0.574721	-0.799066	0.0163066	0.0692945	No	Yes	-0.680574
T303_08965	0.685338	-0.545113	0.0163668	0.0692945	No	Yes	-1.42095
T303_09735	0.629077	-0.668692	0.0165002	0.0696295	No	Yes	-0.518199
T303_03820	1.71837	0.781042	0.016958	0.0705687	No	Yes	0.173334
T303_06625	0.679306	-0.557866	0.0174467	0.0719415	No	Yes	-2.04012
T303_08845	1.65622	0.727898	0.017457	0.0719415	No	Yes	-1.26543
T303_03125	0.566919	-0.818785	0.0177756	0.0727259	No	Yes	-2.91363
T303_02655	1.83868	0.878668	0.0178216	0.0727397	No	Yes	1.80935
T303_00295	0.422468	-1.24309	0.018204	0.0737695	No	Yes	-1.38883
T303_06485	2.38162	1.25194	0.0183904	0.074138	No	Yes	-0.327899
T303_03260	0.494136	-1.01702	0.019325	0.0768485	No	Yes	-1.47838
T303_09015	0.394954	-1.34024	0.0196479	0.0777691	No	Yes	0.493341
T303_03875	0.666733	-0.58482	0.0203931	0.0799365	No	Yes	-0.168998
T303_06660	0.511095	-0.968338	0.0203191	0.0799365	No	Yes	-3.37306
T303_08350	0.652071	-0.6169	0.0205004	0.0800267	No	Yes	0.311898
T303_07645	0.3625	-1.46395	0.0209457	0.081578	No	Yes	-0.979896
T303_00220	1.48548	0.570929	0.02107	0.0818537	No	Yes	-0.257583
T303_06890	0.655955	-0.608332	0.0214297	0.082664	No	Yes	-0.3594
T303_01150	1.35181	0.434888	0.022036	0.0842815	No	Yes	-0.657755
T303_01650	0.650213	-0.621015	0.0229711	0.0860822	No	Yes	-0.0927005
T303_05725	0.700147	-0.51427	0.0229335	0.0860822	No	Yes	-0.0528373
T303_08970	0.654636	-0.611235	0.0230126	0.0860822	No	Yes	-1.02709
T303_09335	0.684684	-0.546489	0.0231996	0.0865917	No	Yes	0.379753
T303_03155	4.78165	2.25751	0.023308	0.0868056	No	Yes	-0.661222
T303_00105	0.687669	-0.540214	0.0238879	0.0883571	No	Yes	-0.336177
T303_08530	1.74517	0.803365	0.0239322	0.0883571	No	Yes	0.0144007
T303_02930	1.57137	0.652021	0.0243906	0.0892749	No	Yes	-0.491755
T303_05610	0.695855	-0.523141	0.0246842	0.089642	No	Yes	-0.0184036
T303_07345	0.591133	-0.758444	0.0246671	0.089642	No	Yes	0.216647
T303_01380	0.459169	-1.1229	0.0250613	0.0903692	No	Yes	-1.44431
T303_01335	0.549619	-0.863497	0.0252515	0.0908627	No	Yes	-1.39534
T303_04175	1.6463	0.719224	0.0254015	0.0912097	No	Yes	0.139536
T303_09380	0.742835	-0.428886	0.0261787	0.0936054	No	Yes	0.10004
T303_06060	0.661613	-0.59594	0.0262784	0.0937649	No	Yes	-0.942455
T303_00755	0.413997	-1.27231	0.0266569	0.0941289	No	Yes	-0.83198
T303_03120	0.604801	-0.725468	0.026765	0.0941289	No	Yes	-0.119345
T303_04815	0.646517	-0.62924	0.0266598	0.0941289	No	Yes	-0.968699
T303_06510	2.07301	1.05173	0.0269207	0.0941289	No	Yes	-0.0326046
T303_01345	0.335402	-1.57604	0.0273229	0.0945195	No	Yes	-1.92959
T303_01970	0.640022	-0.643806	0.0272811	0.0945195	No	Yes	-0.12203
T303_03895	0.625193	-0.677626	0.0274555	0.0947856	No	Yes	-0.921059
T303_02230	2.29243	1.19688	0.028044	0.096038	No	Yes	-0.591288
T303_01655	0.700592	-0.513353	0.0284917	0.0969858	No	Yes	-1.50485
T303_08815	1.5916	0.670476	0.0285825	0.0971005	No	Yes	0.229804
T303_06085	3.09167	1.62839	0.0288752	0.0977049	No	Yes	1.97296
T303_01330	0.543471	-0.879725	0.0290531	0.0979177	No	Yes	-1.40352
T303_04590	1.50875	0.593357	0.0295822	0.0995038	No	Yes	-0.254171
T303_04910	0.654075	-0.612473	0.0298842	0.100273	No	Yes	-0.257978
T303_00005	0.612047	-0.708285	0.0305954	0.101732	No	Yes	-0.384793
T303_04315	0.580334	-0.785045	0.0310361	0.102173	No	Yes	-0.822673
T303_05130	12.0443	3.59027	0.0331092	0.107133	No	Yes	1.1056
T303_02375	1.61347	0.690163	0.0333349	0.107658	No	Yes	1.4007
T303_00940	0.600293	-0.736262	0.033465	0.107874	No	Yes	0.00391263
T303_01625	0.545186	-0.875179	0.0339416	0.108468	No	Yes	-1.25045
T303_03115	0.610177	-0.712699	0.0339678	0.108468	No	Yes	-0.822907
T303_06745	0.494117	-1.01707	0.0345024	0.109968	No	Yes	-0.798211
T303_06655	0.564889	-0.823959	0.0355233	0.11259	No	Yes	-0.796331
T303_00300	0.541515	-0.884927	0.0356751	0.112849	No	Yes	-0.0660013
T303_07870	2.6225	1.39094	0.0357621	0.112849	No	Yes	-1.39919
T303_09700	0.704054	-0.506241	0.0360029	0.112849	No	Yes	-0.945716
T303_00885	2.20787	1.14266	0.0371445	0.115843	No	Yes	4.01838
T303_05140	1.54115	0.624007	0.0376713	0.117001	No	Yes	0.575665
T303_08340	0.520243	-0.942742	0.0381208	0.117752	No	Yes	-0.783953
T303_00315	0.751539	-0.412079	0.0388013	0.119205	No	Yes	-0.38769
T303_05350	0.643899	-0.635094	0.0390521	0.119544	No	Yes	0.902763
T303_03370	0.699545	-0.515511	0.041597	0.125306	No	Yes	-0.663413
T303_06505	2.05805	1.04128	0.0421276	0.126234	No	Yes	-1.04315
T303_01405	0.53435	-0.904142	0.0443634	0.131353	No	Yes	-1.26631
T303_06455	1.74297	0.801545	0.0443759	0.131353	No	Yes	-0.569023
T303_01340	0.409232	-1.28901	0.0449477	0.132126	No	Yes	-1.14877
T303_08935	1.55903	0.640653	0.0451257	0.132193	No	Yes	-0.31866
T303_01300	0.627731	-0.671781	0.0455026	0.132967	No	Yes	-1.02328
T303_05650	0.746993	-0.420833	0.0458457	0.13346	No	Yes	-1.02142
T303_00175	0.707326	-0.499552	0.0465934	0.134867	No	Yes	-0.308822
T303_07285	0.298684	-1.74331	0.0467069	0.134966	No	Yes	-1.31858
T303_00880	2.10623	1.07466	0.0476866	0.136086	No	Yes	3.74565
T303_01620	0.563819	-0.826697	0.0474642	0.136086	No	Yes	-1.27223
T303_03955	0.730966	-0.452123	0.0480568	0.136086	No	Yes	-0.623409
T303_03100	0.63412	-0.657171	0.0487692	0.137199	No	Yes	-1.06829
T303_06650	0.652748	-0.615403	0.0492211	0.138241	No	Yes	-0.690314
T303_07155	0.692003	-0.531151	0.049672	0.138633	No	Yes	-1.13584
T303_01155	1.43872	0.524786	0.0498997	0.138773	No	Yes	-0.337704
T303_01095	1.27902	0.355038	0.0507224	0.139808	No	Yes	0.468283
T303_04610	1.38816	0.473178	0.0517359	0.141113	No	Yes	0.106853
T303_03725	0.543973	-0.878394	0.0545742	0.146971	No	Yes	-0.618967
T303_03095	0.631634	-0.662839	0.0547995	0.147297	No	Yes	-0.613314
T303_05345	0.672273	-0.572881	0.0550281	0.147297	No	Yes	-0.612021
T303_04040	0.753633	-0.408065	0.0553896	0.147764	No	Yes	-0.904512
T303_07885	1.57891	0.658925	0.0562811	0.149439	No	Yes	0.993891
T303_09660	0.734416	-0.445331	0.0565932	0.150034	No	Yes	-0.476933
T303_00310	0.705311	-0.503668	0.056833	0.150435	No	Yes	-1.17921
T303_02640	2.08128	1.05747	0.0571945	0.150879	No	Yes	-1.44849
T303_02900	7.23381	2.85476	0.0572665	0.150879	No	Yes	0.555113
T303_01390	0.517528	-0.950291	0.0583201	0.153111	No	Yes	-2.08243
T303_04850	1.87206	0.904626	0.0584874	0.153147	No	Yes	-0.749703
T303_04895	0.699664	-0.515265	0.0587537	0.153372	No	Yes	0.0874231
T303_06005	0.728924	-0.456159	0.0602037	0.156228	No	Yes	-0.425117
T303_07865	2.09665	1.06809	0.0607774	0.157208	No	Yes	-0.839995
T303_00045	0.617961	-0.694412	0.0624968	0.160437	No	Yes	-0.382171
T303_08880	0.794244	-0.332346	0.0626188	0.160462	No	Yes	-0.371812
T303_01820	0.49237	-1.02219	0.0650098	0.164739	No	Yes	-0.741216
T303_04255	0.742565	-0.429411	0.066049	0.166295	No	Yes	1.0431
T303_08030	0.755418	-0.404653	0.066009	0.166295	No	Yes	-1.46527
T303_08245	0.791332	-0.337644	0.0686169	0.17124	No	Yes	0.152947
T303_02815	0.653652	-0.613405	0.0715646	0.175762	No	Yes	-0.0704985
T303_08335	0.563566	-0.827342	0.0715145	0.175762	No	Yes	-0.793438
T303_02475	0.790291	-0.339545	0.0730948	0.17818	No	Yes	-0.71482
T303_08835	0.668403	-0.581211	0.0747702	0.180877	No	Yes	-0.864333
T303_01050	0.73988	-0.434638	0.076552	0.184082	No	Yes	0.26149
T303_03235	0.776071	-0.365739	0.0764289	0.184082	No	Yes	-1.07993
T303_09805	0.789973	-0.340124	0.0765748	0.184082	No	Yes	0.838291
T303_04320	1.74021	0.799258	0.0786677	0.187827	No	Yes	0.286374
T303_02740	1.35558	0.43891	0.0788408	0.187937	No	Yes	-0.0953027
T303_07180	0.756725	-0.402159	0.0797456	0.189828	No	Yes	-0.571341
T303_02295	1.30873	0.388166	0.0816632	0.19385	No	Yes	-0.885797
T303_02895	5.68273	2.50658	0.0821078	0.194634	No	Yes	0.879256
T303_09765	0.713197	-0.487627	0.0838241	0.197876	No	Yes	-1.79608
T303_08205	0.771683	-0.373919	0.0867711	0.203142	No	Yes	-2.10356
T303_02515	1.37216	0.456449	0.0881475	0.205517	No	Yes	0.812752
T303_02025	0.591193	-0.758299	0.0911075	0.210686	No	Yes	-1.08778
T303_03470	0.815151	-0.29486	0.0922864	0.212546	No	Yes	-0.826578
T303_06460	1.58135	0.661152	0.0925886	0.212666	No	Yes	-0.62585
T303_03300	0.76373	-0.388866	0.0949725	0.2161	No	Yes	-1.23724
T303_02705	0.709248	-0.495638	0.0960185	0.2168	No	Yes	-0.197242
T303_03305	0.754809	-0.405817	0.0961485	0.2168	No	Yes	-1.24417
T303_03090	0.684792	-0.546263	0.0973118	0.218502	No	Yes	-1.09358
T303_07005	1.32563	0.406681	0.0980995	0.218881	No	Yes	-0.830778
T303_08415	1.33835	0.420459	0.0980002	0.218881	No	Yes	-1.63384
T303_00870	2.06252	1.04441	0.0996055	0.221028	No	Yes	0.862419
T303_03085	0.639753	-0.644413	0.100519	0.222765	No	Yes	-0.532012
T303_01675	0.766987	-0.382727	0.100727	0.222935	No	Yes	-1.14992
T303_07215	1.23863	0.308741	0.104199	0.228246	No	Yes	-0.546203
T303_03220	0.752617	-0.410012	0.105635	0.229826	No	Yes	-0.467125
T303_06840	0.7441	-0.426431	0.105503	0.229826	No	Yes	-0.41751
T303_08160	0.809275	-0.305299	0.107329	0.23182	No	Yes	-0.0243739
T303_02605	0.66087	-0.597562	0.108222	0.232862	No	Yes	-0.670603
T303_03295	0.705089	-0.504122	0.111426	0.237569	No	Yes	-1.10932
T303_02845	1.48741	0.572806	0.112563	0.238326	No	Yes	-1.14739
T303_06415	0.740052	-0.434302	0.112582	0.238326	No	Yes	-1.94247
T303_07210	1.2693	0.34403	0.11333	0.239441	No	Yes	-0.905329
T303_01035	0.701745	-0.510982	0.115462	0.242014	No	Yes	-0.742947
T303_00040	0.659187	-0.601241	0.118612	0.247702	No	Yes	-1.15148
T303_06925	1.25744	0.330493	0.12515	0.257253	No	Yes	-0.579513
T303_07195	0.804092	-0.314567	0.126039	0.258457	No	Yes	-0.886531
T303_04065	0.788637	-0.342567	0.128424	0.261145	No	Yes	-0.528305
T303_07350	1.9281	0.947177	0.12819	0.261145	No	Yes	0.124462
T303_00810	0.784957	-0.349314	0.130438	0.263979	No	Yes	-0.991626
T303_02730	1.22869	0.297122	0.133011	0.267594	No	Yes	0.0246238
T303_02810	3.75921	1.91043	0.134385	0.26972	No	Yes	1.46348
T303_00840	0.644865	-0.632931	0.136386	0.272801	No	Yes	-1.10089
T303_00935	0.629523	-0.667669	0.136412	0.272801	No	Yes	-0.737252
T303_08250	0.810242	-0.303574	0.137301	0.273958	No	Yes	-0.156239
T303_07020	0.754532	-0.406346	0.142861	0.281749	No	Yes	-1.84212
T303_07890	1.55167	0.633822	0.145996	0.286935	No	Yes	-0.998657
T303_04605	1.24116	0.311689	0.147041	0.288655	No	Yes	-1.6628
T303_08100	0.739068	-0.436221	0.153573	0.299406	No	Yes	-1.28479
T303_05260	1.26315	0.337021	0.154445	0.300418	No	Yes	-0.484456
T303_02330	1.23058	0.299339	0.156678	0.303374	No	Yes	-0.180417
T303_06570	0.789868	-0.340317	0.157844	0.304592	No	Yes	0.194822
T303_03730	0.574042	-0.800771	0.161424	0.309047	No	Yes	-1.78012
T303_08765	1.48392	0.56941	0.16129	0.309047	No	Yes	-0.185117
T303_01320	1.22879	0.297244	0.163126	0.311606	No	Yes	0.304646
T303_05405	1.63989	0.713597	0.167308	0.316749	No	Yes	1.06306
T303_06995	1.22896	0.297436	0.168306	0.317229	No	Yes	-0.444193
T303_07880	1.29059	0.368036	0.168151	0.317229	No	Yes	0.464196
T303_07635	0.504232	-0.987841	0.170356	0.318973	No	Yes	2.55441
T303_05990	1.35929	0.442851	0.171103	0.319708	No	Yes	-0.0608057
T303_03075	0.673666	-0.569894	0.173405	0.321335	No	Yes	-0.778829
T303_06410	0.754896	-0.40565	0.173363	0.321335	No	Yes	0.203228
T303_05295	0.821229	-0.284143	0.174186	0.321545	No	Yes	-0.567721
T303_09585	0.658185	-0.603434	0.180806	0.329477	No	Yes	-1.60711
T303_02235	1.86227	0.897063	0.188728	0.338419	No	Yes	-0.790236
T303_08695	0.732146	-0.449797	0.187742	0.338419	No	Yes	-0.78742
T303_02595	0.733193	-0.447735	0.189507	0.338743	No	Yes	-1.04007
T303_03545	0.785069	-0.349109	0.189672	0.338743	No	Yes	-0.931582
T303_06055	0.736165	-0.441898	0.190088	0.33913	No	Yes	-1.51233
T303_04345	1.24169	0.312308	0.198989	0.350238	No	Yes	0.0243396
T303_04060	0.822943	-0.281135	0.203365	0.355274	No	Yes	-0.498045
T303_09445	0.798286	-0.325023	0.206895	0.359264	No	Yes	-0.851856
T303_09485	0.815557	-0.294143	0.209369	0.362407	No	Yes	-1.14419
T303_06855	0.702215	-0.510015	0.21291	0.366775	No	Yes	-1.58889
T303_01730	0.779081	-0.360155	0.21348	0.367384	No	Yes	-0.152426
T303_04945	0.81947	-0.287237	0.214268	0.368367	No	Yes	-0.709892
T303_06645	0.766943	-0.382809	0.219247	0.371932	No	Yes	0.0916181
T303_08165	0.859354	-0.218676	0.22215	0.375486	No	Yes	-1.0967
T303_02315	0.813527	-0.297737	0.223971	0.377051	No	Yes	-1.57575
T303_04855	0.769422	-0.378153	0.225433	0.378763	No	Yes	-1.17886
T303_04375	0.837731	-0.25544	0.225919	0.379206	No	Yes	0.932613
T303_05225	0.685176	-0.545454	0.229263	0.382554	No	Yes	-0.876942
T303_01430	1.27156	0.346598	0.23064	0.384149	No	Yes	0.273762
T303_04580	1.24879	0.320531	0.231153	0.384578	No	Yes	0.634475
T303_06720	1.16396	0.219037	0.236197	0.392202	No	Yes	-2.15016
T303_04230	0.766859	-0.382967	0.23708	0.392902	No	Yes	-0.965709
T303_05575	0.836389	-0.257753	0.237433	0.393103	No	Yes	0.0153613
T303_02240	1.47501	0.560722	0.240778	0.398255	No	Yes	2.36793
T303_03385	1.19942	0.262334	0.242614	0.400125	No	Yes	0.528415
T303_05530	0.797722	-0.326042	0.245038	0.402562	No	Yes	-1.1714
T303_06865	0.751623	-0.411919	0.245947	0.403277	No	Yes	1.17733
T303_06680	0.85363	-0.228317	0.247241	0.403842	No	Yes	-0.09891
T303_05955	1.34209	0.424485	0.249948	0.407336	No	Yes	-0.0373903
T303_02380	1.19871	0.26148	0.251225	0.408663	No	Yes	-1.10493
T303_04595	1.20534	0.269445	0.252794	0.409766	No	Yes	0.85488
T303_09590	0.729666	-0.454691	0.252557	0.409766	No	Yes	-1.03032
T303_01125	0.858923	-0.219399	0.25591	0.413244	No	Yes	-0.671858
T303_08270	1.20016	0.263232	0.257963	0.414984	No	Yes	-0.672117
T303_01110	0.851747	-0.231502	0.259978	0.417124	No	Yes	-0.630552
T303_02395	0.826121	-0.275574	0.264983	0.423198	No	Yes	0.792469
T303_04665	1.17519	0.232888	0.265058	0.423198	No	Yes	-0.594339
T303_01980	0.771244	-0.37474	0.273658	0.434484	No	Yes	-1.18684
T303_05720	0.811813	-0.30078	0.273962	0.434561	No	Yes	0.264268
T303_02245	1.4466	0.532665	0.276911	0.438829	No	Yes	0.229804
T303_04885	0.847794	-0.238214	0.278528	0.440981	No	Yes	0.0995906
T303_09770	0.781344	-0.355971	0.278932	0.441211	No	Yes	-0.88936
T303_05520	0.590599	-0.759748	0.285614	0.450106	No	Yes	-1.61452
T303_02950	1.26074	0.334274	0.291154	0.455883	No	Yes	-1.59912
T303_07405	0.852275	-0.23061	0.293748	0.458258	No	Yes	-0.618978
T303_09595	0.757083	-0.401477	0.295556	0.459393	No	Yes	-0.973783
T303_05040	0.866453	-0.206806	0.301616	0.465413	No	Yes	-1.46388
T303_08035	0.878164	-0.187438	0.303098	0.466854	No	Yes	-0.223136
T303_05360	0.874165	-0.194023	0.305092	0.4695	No	Yes	-0.113242
T303_03905	1.27992	0.356048	0.307523	0.472386	No	Yes	0.0798184
T303_04975	0.854133	-0.227467	0.310564	0.476199	No	Yes	-1.50151
T303_02945	1.26373	0.337685	0.311423	0.477086	No	Yes	-0.825523
T303_01845	0.739424	-0.435526	0.320113	0.486024	No	Yes	-0.610286
T303_00560	0.712126	-0.489797	0.323022	0.48878	No	Yes	-0.941895
T303_01735	0.784876	-0.349464	0.323077	0.48878	No	Yes	-0.607594
T303_07415	0.869999	-0.200915	0.323807	0.489449	No	Yes	-0.802356
T303_04165	0.815456	-0.294322	0.325845	0.490786	No	Yes	0.57232
T303_00540	0.700865	-0.512792	0.32912	0.493534	No	Yes	-1.21815
T303_00545	0.718391	-0.477158	0.329681	0.493942	No	Yes	-1.0153
T303_00535	0.744893	-0.424895	0.331551	0.49533	No	Yes	-0.0485519
T303_06195	1.31771	0.398028	0.331651	0.49533	No	Yes	-0.63994
T303_00570	0.689204	-0.536997	0.332692	0.495834	No	Yes	-0.944302
T303_07340	1.1659	0.221447	0.333534	0.496653	No	Yes	-0.909964
T303_03920	1.33641	0.418362	0.337012	0.50033	No	Yes	2.32628
T303_06180	1.30861	0.388035	0.337179	0.50033	No	Yes	0.294822
T303_00585	0.709708	-0.494703	0.338267	0.50107	No	Yes	-0.506659
T303_00565	0.708563	-0.497031	0.34095	0.503293	No	Yes	-0.543957
T303_07255	1.16299	0.217845	0.341543	0.50333	No	Yes	-0.313923
T303_00530	0.72837	-0.457257	0.342484	0.504245	No	Yes	-1.3055
T303_04395	0.893922	-0.161779	0.348762	0.510326	No	Yes	0.0268202
T303_08560	0.770281	-0.376543	0.348638	0.510326	No	Yes	-1.76289
T303_05985	0.809441	-0.305002	0.350172	0.511581	No	Yes	1.17171
T303_06400	0.82272	-0.281527	0.354601	0.517258	No	Yes	-0.940431
T303_00350	1.13296	0.180094	0.357136	0.517815	No	Yes	-0.585941
T303_03420	1.14959	0.20112	0.35842	0.518535	No	Yes	-0.339925
T303_03540	0.839029	-0.253207	0.358588	0.518535	No	Yes	-0.0265142
T303_00270	0.792589	-0.335355	0.35897	0.518648	No	Yes	-1.11608
T303_08420	1.13832	0.186903	0.362187	0.521525	No	Yes	1.01276
T303_00550	0.727803	-0.458381	0.367901	0.524868	No	Yes	-0.758842
T303_09635	1.13695	0.185163	0.367892	0.524868	No	Yes	-0.606282
T303_00555	0.732809	-0.448491	0.371458	0.527731	No	Yes	-0.859147
T303_06900	0.842218	-0.247735	0.370583	0.527731	No	Yes	0.194735
T303_08860	0.836886	-0.256896	0.37963	0.537746	No	Yes	-2.00551
T303_00580	0.717655	-0.478637	0.384738	0.541177	No	Yes	-1.16943
T303_09775	0.784324	-0.350478	0.383792	0.541177	No	Yes	-1.27815
T303_03780	1.27705	0.35281	0.387705	0.5449	No	Yes	-0.574995
T303_02585	0.826243	-0.275363	0.391577	0.54808	No	Yes	-1.41244
T303_04390	0.896301	-0.157945	0.400818	0.55836	No	Yes	-0.602007
T303_02090	1.14009	0.189146	0.405035	0.559264	No	Yes	-0.0608826
T303_03065	0.772648	-0.372116	0.405508	0.559264	No	Yes	-0.0231811
T303_04380	0.897642	-0.155787	0.405811	0.559264	No	Yes	-0.678816
T303_00275	0.834257	-0.261436	0.409973	0.563175	No	Yes	-1.03212
T303_00515	1.19328	0.254934	0.41314	0.56661	No	Yes	1.30373
T303_06385	1.1902	0.2512	0.416169	0.569388	No	Yes	-0.727828
T303_00575	0.730501	-0.453042	0.416622	0.569551	No	Yes	-1.04251
T303_04045	0.846135	-0.24104	0.420215	0.573081	No	Yes	-0.14954
T303_08705	0.907591	-0.139885	0.424871	0.578505	No	Yes	1.37483
T303_06785	0.898456	-0.15448	0.425593	0.578561	No	Yes	-0.805304
T303_06845	0.85972	-0.218061	0.425552	0.578561	No	Yes	-0.523005
T303_00325	1.15938	0.213348	0.430237	0.581161	No	Yes	-0.440841
T303_08675	0.892381	-0.164268	0.429849	0.581161	No	Yes	0.154323
T303_05155	0.825738	-0.276243	0.435505	0.585952	No	Yes	0.751752
T303_01865	0.842164	-0.247827	0.440541	0.591799	No	Yes	0.517093
T303_03785	1.21959	0.286402	0.445913	0.597124	No	Yes	-0.579295
T303_08010	0.91917	-0.121597	0.448438	0.598853	No	Yes	0.788455
T303_00960	0.844925	-0.243105	0.452389	0.600397	No	Yes	-0.718338
T303_06185	1.23741	0.307323	0.459329	0.606251	No	Yes	0.346459
T303_06190	1.23079	0.299583	0.459853	0.606251	No	Yes	-3.2337
T303_00520	0.812894	-0.298861	0.474304	0.622047	No	Yes	-0.549019
T303_02095	1.13872	0.187412	0.474759	0.622047	No	Yes	0.618094
T303_03055	0.848835	-0.236444	0.481373	0.62926	No	Yes	-0.633807
T303_08555	0.790803	-0.338609	0.492284	0.640572	No	Yes	-0.777025
T303_09780	0.818888	-0.288262	0.49322	0.6413	No	Yes	-1.31505
T303_02365	0.915901	-0.126736	0.494408	0.641438	No	Yes	-0.404104
T303_08070	0.739784	-0.434823	0.494457	0.641438	No	Yes	-0.0265142
T303_06305	1.35906	0.442609	0.498992	0.644863	No	Yes	1.25668
T303_08175	0.88563	-0.175225	0.502062	0.647846	No	Yes	-0.693861
T303_04105	1.14517	0.195556	0.507798	0.653083	No	Yes	0.736071
T303_04880	0.903897	-0.14577	0.508999	0.653331	No	Yes	-0.0324715
T303_00590	0.7834	-0.352179	0.517367	0.660089	No	Yes	-0.827898
T303_00425	1.28369	0.360301	0.519671	0.662036	No	Yes	-0.271649
T303_04110	0.928838	-0.106501	0.522535	0.663981	No	Yes	0.0398593
T303_06575	0.90567	-0.142943	0.522758	0.663981	No	Yes	0.0142666
T303_07680	1.17584	0.233695	0.526504	0.66823	No	Yes	1.6972
T303_04865	1.1185	0.161571	0.532445	0.671938	No	Yes	-0.395876
T303_05515	0.708369	-0.497426	0.53252	0.671938	No	Yes	-1.50053
T303_08535	0.915045	-0.128085	0.537299	0.675394	No	Yes	-0.648625
T303_08075	0.776129	-0.365631	0.538128	0.675438	No	Yes	-1.62559
T303_09180	1.12626	0.17154	0.540791	0.676631	No	Yes	0.163774
T303_07265	1.15076	0.202587	0.543354	0.677501	No	Yes	0.00130366
T303_04295	1.08979	0.124044	0.55353	0.686168	No	Yes	-1.41629
T303_05580	0.840965	-0.249882	0.562148	0.695837	No	Yes	0.144838
T303_00600	0.817719	-0.290322	0.56618	0.698764	No	Yes	-1.77771
T303_00605	0.815603	-0.294061	0.566565	0.698764	No	Yes	-0.877115
T303_00595	0.81287	-0.298904	0.568643	0.700345	No	Yes	-0.23192
T303_02465	1.12405	0.168705	0.570769	0.702416	No	Yes	-0.939106
T303_03580	1.18641	0.246604	0.572898	0.703515	No	Yes	-1.13425
T303_01855	1.14838	0.199598	0.58666	0.716281	No	Yes	0.24157
T303_04835	0.842178	-0.247804	0.586431	0.716281	No	Yes	2.28336
T303_07055	1.12164	0.165612	0.586183	0.716281	No	Yes	-0.949856
T303_03455	1.09179	0.126691	0.592356	0.721289	No	Yes	-1.72062
T303_08865	0.929223	-0.105902	0.593159	0.721289	No	Yes	-1.07355
T303_09565	1.12889	0.174901	0.593729	0.721289	No	Yes	-0.124374
T303_02490	0.883775	-0.178249	0.595462	0.722854	No	Yes	-0.0330816
T303_04960	0.932491	-0.100838	0.599646	0.726921	No	Yes	-0.467359
T303_04125	1.09952	0.136877	0.601695	0.727576	No	Yes	-0.667466
T303_04825	0.851731	-0.231531	0.603698	0.728719	No	Yes	0.618243
T303_01900	1.20112	0.264378	0.608587	0.733953	No	Yes	1.50714
T303_08540	0.926227	-0.110562	0.61309	0.737441	No	Yes	0.290103
T303_01850	0.864053	-0.210809	0.614828	0.737534	No	Yes	0.622393
T303_02410	1.06066	0.0849611	0.61452	0.737534	No	Yes	0.48085
T303_02085	1.0928	0.128023	0.618287	0.740553	No	Yes	-0.990723
T303_07045	0.902151	-0.148559	0.624846	0.747356	No	Yes	-0.912849
T303_02865	1.13949	0.188391	0.62559	0.74743	No	Yes	-0.940224
T303_05290	0.938206	-0.0920239	0.626344	0.74743	No	Yes	-0.378964
T303_00630	0.871198	-0.198927	0.642887	0.758802	No	Yes	-0.953143
T303_08080	0.845822	-0.241574	0.642825	0.758802	No	Yes	-1.5589
T303_06980	1.06539	0.0913858	0.643664	0.759194	No	Yes	-0.411482
T303_08740	1.0612	0.0857034	0.648621	0.76451	No	Yes	-0.852099
T303_02755	1.0815	0.113031	0.651381	0.765114	No	Yes	0.146478
T303_03450	1.0859	0.118891	0.650694	0.765114	No	Yes	-0.476826
T303_09680	0.925704	-0.111377	0.665132	0.775405	No	Yes	-2.33416
T303_07395	0.942704	-0.0851237	0.670301	0.778738	No	Yes	-0.679752
T303_06700	1.11772	0.160556	0.672579	0.780252	No	Yes	0.278914
T303_07430	0.929857	-0.10492	0.674835	0.780809	No	Yes	-1.05335
T303_02720	0.936991	-0.0938922	0.677313	0.783143	No	Yes	-0.296927
T303_06010	1.06094	0.0853443	0.679113	0.784159	No	Yes	-2.19223
T303_09650	1.0518	0.0728612	0.681792	0.786186	No	Yes	-0.626932
T303_08085	0.885487	-0.175457	0.685176	0.787952	No	Yes	-1.07799
T303_05015	1.06299	0.088126	0.701262	0.801039	No	Yes	0.156765
T303_00610	0.872183	-0.197297	0.703078	0.802037	No	Yes	-1.2397
T303_03210	0.92535	-0.111929	0.706366	0.804709	No	Yes	0.0828991
T303_06336	1.06052	0.0847674	0.715186	0.811498	No	Yes	-0.537068
T303_04305	1.04629	0.0652866	0.728769	0.823615	No	Yes	0.0991166
T303_00615	0.894848	-0.160286	0.730957	0.824279	No	Yes	0.394308
T303_07670	1.077	0.107014	0.737965	0.827296	No	Yes	1.0108
T303_07050	0.933067	-0.0999474	0.741954	0.829701	No	Yes	-1.31845
T303_02005	0.94536	-0.0810646	0.745895	0.833014	No	Yes	-0.373542
T303_00490	1.07894	0.109617	0.748367	0.834679	No	Yes	-0.83422
T303_08425	1.06405	0.089568	0.755583	0.839025	No	Yes	-1.03827
T303_08485	1.06467	0.0904066	0.760942	0.843728	No	Yes	0.428848
T303_02010	0.957672	-0.0623967	0.764021	0.845525	No	Yes	0.213874
T303_03140	1.05057	0.071176	0.763691	0.845525	No	Yes	-0.112563
T303_09010	0.940903	-0.0878828	0.764703	0.84564	No	Yes	-0.151598
T303_02290	0.966665	-0.0489122	0.766962	0.846844	No	Yes	-1.53203
T303_01415	0.963017	-0.0543663	0.771939	0.851484	No	Yes	0.103614
T303_09005	1.05714	0.0801706	0.774418	0.852994	No	Yes	-1.1613
T303_07305	1.05566	0.078139	0.784487	0.863088	No	Yes	-0.326829
T303_02590	0.941858	-0.0864179	0.785662	0.863264	No	Yes	-0.728473
T303_05900	0.9414	-0.0871199	0.787587	0.863629	No	Yes	-0.217268
T303_08430	0.963582	-0.0535211	0.788166	0.863629	No	Yes	-0.493331
T303_00495	1.06499	0.0908368	0.795975	0.869044	No	Yes	-0.701982
T303_02335	1.04166	0.0588784	0.797812	0.869319	No	Yes	-0.688739
T303_04145	1.02868	0.0407994	0.798795	0.869833	No	Yes	-1.01671
T303_02165	0.950635	-0.0730364	0.800362	0.870426	No	Yes	1.59882
T303_04970	1.03676	0.0520856	0.799976	0.870426	No	Yes	0.581972
T303_02080	1.05572	0.0782215	0.803231	0.870763	No	Yes	0.707643
T303_07065	0.950431	-0.0733455	0.80976	0.876196	No	Yes	-1.00597
T303_00500	1.05766	0.0808825	0.8119	0.877368	No	Yes	-1.05442
T303_02065	0.976297	-0.034608	0.829896	0.889473	No	Yes	-0.0204725
T303_00505	1.04849	0.0683132	0.835573	0.893308	No	Yes	-1.04527
T303_07245	0.974512	-0.0372476	0.837203	0.894488	No	Yes	-0.0900176
T303_08285	0.938963	-0.0908601	0.848364	0.902558	No	Yes	-1.10368
T303_02710	1.02467	0.0351644	0.861066	0.90914	No	Yes	-0.610256
T303_07425	0.972528	-0.040189	0.863698	0.910225	No	Yes	-0.680114
T303_09830	1.01793	0.0256407	0.870492	0.915684	No	Yes	0.305639
T303_06915	1.0209	0.0298431	0.872043	0.916749	No	Yes	0.216516
T303_03165	1.03436	0.0487362	0.892528	0.933671	No	Yes	-0.122029
T303_08515	0.979735	-0.0295367	0.895117	0.934837	No	Yes	-0.577328
T303_04930	0.979751	-0.0295129	0.899317	0.936832	No	Yes	-0.595231
T303_06940	0.959508	-0.0596338	0.905569	0.941526	No	Yes	1.2103
T303_02345	0.96573	-0.0503081	0.907168	0.942038	No	Yes	0.31421
T303_00970	0.978999	-0.0306206	0.910522	0.94418	No	Yes	0.449408
T303_04915	1.01672	0.0239219	0.910054	0.94418	No	Yes	-0.2204
T303_06580	0.985128	-0.0216163	0.913093	0.945172	No	Yes	-1.20506
T303_00620	0.972095	-0.0408302	0.929261	0.956807	No	Yes	-1.05716
T303_07240	0.982926	-0.0248459	0.934133	0.960267	No	Yes	-0.438404
T303_07270	1.01999	0.0285593	0.934314	0.960267	No	Yes	0.704799
T303_03995	0.9899	-0.0146451	0.937203	0.961029	No	Yes	-0.364048
T303_06880	1.02112	0.0301571	0.937864	0.961029	No	Yes	-0.660113
T303_08580	1.0092	0.0132162	0.942327	0.963157	No	Yes	1.25351
T303_08090	0.982934	-0.0248329	0.944074	0.963896	No	Yes	-0.058799
T303_09785	0.989049	-0.0158856	0.946824	0.966124	No	Yes	-0.189632
T303_02785	1.01097	0.0157443	0.947434	0.966167	No	Yes	-0.510797
T303_02860	0.985699	-0.0207815	0.954045	0.968975	No	Yes	-0.942157
T303_06235	0.993181	-0.00987197	0.957203	0.970893	No	Yes	0.39566
T303_08005	0.992619	-0.010688	0.956796	0.970893	No	Yes	-0.220645
T303_01725	1.01504	0.0215317	0.960512	0.97309	No	Yes	-0.988802
T303_05160	1.0093	0.0133512	0.964532	0.976582	No	Yes	-0.582586
T303_00625	0.98873	-0.0163516	0.969303	0.977987	No	Yes	-1.0657
T303_02075	0.990328	-0.014022	0.968223	0.977987	No	Yes	1.86609
T303_03180	0.994871	-0.00741855	0.970173	0.977987	No	Yes	-0.125571
T303_04400	1.00515	0.00740479	0.969699	0.977987	No	Yes	0.519007
T303_06600	0.994672	-0.00770652	0.971735	0.978056	No	Yes	-1.18683
T303_06730	1.01313	0.018826	0.977439	0.982635	No	Yes	0.80584
T303_03205	0.998395	-0.00231805	0.99247	0.993638	No	Yes	-0.573468
T303_02195	0.999686	-0.000453195	0.998615	0.998615	No	Yes	-0.00237394
T303_06120	6.57479	2.71695	1.31448e-05	0.00417659	Up
T303_06115	5.9277	2.56747	3.20969e-06	0.00417659	Up
T303_06110	5.45455	2.44746	1.60895e-05	0.00417659	Up
T303_07955	3.75616	1.90926	1.62235e-05	0.00417659	Up
T303_05825	3.3674	1.75163	2.20854e-05	0.00417659	Up
T303_09390	0.3437	-1.54078	1.47823e-05	0.00417659	Down
T303_04420	6.6269	2.72833	4.238e-05	0.00437928	Up
T303_06985	3.2096	1.68239	4.44844e-05	0.00437928	Up
T303_05935	2.99767	1.58384	4.21589e-05	0.00437928	Up
T303_02570	2.90555	1.53881	4.88874e-05	0.00437928	Up
T303_05475	2.87767	1.5249	2.73012e-05	0.00437928	Up
T303_04035	2.81749	1.49441	4.872e-05	0.00437928	Up
T303_08065	0.382213	-1.38755	3.64503e-05	0.00437928	Down
T303_09235	0.259085	-1.94851	3.26786e-05	0.00437928	Down
T303_09375	11.9574	3.57983	7.25644e-05	0.0048496	Up
T303_08725	6.18489	2.62875	6.60213e-05	0.0048496	Up
T303_06095	6.12001	2.61353	7.29796e-05	0.0048496	Up
T303_06105	5.79477	2.53475	7.30885e-05	0.0048496	Up
T303_05940	3.27637	1.7121	7.17494e-05	0.0048496	Up
T303_09245	0.233833	-2.09645	9.38446e-05	0.00550771	Down
T303_09395	0.414356	-1.27106	9.93727e-05	0.00563774	Down
T303_08000	3.32568	1.73365	0.000117964	0.00608411	Up
T303_03355	5.45955	2.44878	0.000146693	0.00713349	Up
T303_08730	4.88727	2.28903	0.000169662	0.00780444	Up
T303_07975	9.51409	3.25007	0.000189281	0.00782961	Up
T303_00320	2.82564	1.49858	0.000193824	0.00782961	Up
T303_00265	2.55319	1.3523	0.00019781	0.00782961	Up
T303_00700	0.207442	-2.26922	0.000187483	0.00782961	Down
T303_08600	0.44544	-1.1667	0.0002658	0.00942819	Down
T303_09100	3.05837	1.61276	0.000281902	0.00959594	Up
T303_06205	3.14804	1.65445	0.000311277	0.00979831	Up
T303_08585	2.20313	1.13956	0.000327487	0.00979831	Up
T303_09465	0.46429	-1.1069	0.000321549	0.00979831	Down
T303_08470	0.417156	-1.26134	0.000311808	0.00979831	Down
T303_09570	0.330738	-1.59624	0.000333902	0.00979831	Down
T303_05315	0.316682	-1.65889	0.00029638	0.00979831	Down
T303_09580	2.52105	1.33402	0.000346468	0.00982815	Up
T303_04765	2.24549	1.16703	0.000366792	0.0100457	Up
T303_05605	0.317484	-1.65524	0.000377571	0.0100457	Down
T303_09895	4.15324	2.05424	0.000410875	0.0101271	Up
T303_04070	3.19771	1.67704	0.000415727	0.0101271	Up
T303_05630	3.06845	1.61751	0.000420195	0.0101271	Up
T303_05860	2.62714	1.39349	0.000415153	0.0101271	Up
T303_01460	2.14296	1.0996	0.000418155	0.0101271	Up
T303_00710	0.193583	-2.36898	0.000422458	0.0101271	Down
T303_04075	3.34403	1.74159	0.000433885	0.0102566	Up
T303_03840	2.75634	1.46275	0.000470442	0.0107165	Up
T303_07325	2.03732	1.02667	0.00047223	0.0107165	Up
T303_08140	2.89941	1.53576	0.000479867	0.0107465	Up
T303_06100	5.20907	2.38103	0.000512007	0.0110429	Up
T303_02160	2.06811	1.04831	0.000515186	0.0110429	Up
T303_07545	6.93239	2.79335	0.000542037	0.0110995	Up
T303_09835	3.38662	1.75985	0.000584124	0.0110995	Up
T303_04195	2.84334	1.50758	0.000565555	0.0110995	Up
T303_00790	2.76096	1.46517	0.000628987	0.0110995	Up
T303_03815	2.37269	1.24652	0.000604601	0.0110995	Up
T303_08950	2.29735	1.19997	0.000624462	0.0110995	Up
T303_05865	2.27044	1.18297	0.000622282	0.0110995	Up
T303_09165	0.5237	-0.933187	0.00055538	0.0110995	Down
T303_03590	0.514686	-0.958236	0.000632578	0.0110995	Down
T303_09240	0.299765	-1.7381	0.000562321	0.0110995	Down
T303_06200	2.98098	1.57579	0.000660222	0.0114663	Up
T303_06975	6.75335	2.7556	0.000695766	0.0116097	Up
T303_08575	2.55927	1.35573	0.000693703	0.0116097	Up
T303_08025	0.524303	-0.931527	0.000693871	0.0116097	Down
T303_09575	0.328873	-1.6044	0.000679785	0.0116097	Down
T303_08735	4.56355	2.19016	0.000721283	0.0119187	Up
T303_09705	4.90659	2.29472	0.000736707	0.0120565	Up
T303_04570	0.479595	-1.06011	0.000749646	0.0120707	Down
T303_01055	2.72429	1.44588	0.000832063	0.0131127	Up
T303_04780	2.21335	1.14623	0.000829189	0.0131127	Up
T303_07560	6.34024	2.66454	0.000854548	0.0131646	Up
T303_07555	5.92023	2.56565	0.000866645	0.0131646	Up
T303_07925	4.04766	2.01709	0.000867433	0.0131646	Up
T303_07295	2.57131	1.3625	0.000874033	0.0131646	Up
T303_00795	2.45546	1.296	0.000844088	0.0131646	Up
T303_08680	1.96991	0.978127	0.00090355	0.0133847	Up
T303_09890	0.27693	-1.85241	0.000904374	0.0133847	Down
T303_01315	0.390219	-1.35764	0.000993966	0.0145839	Down
T303_05495	3.07641	1.62125	0.00103	0.0149835	Up
T303_08295	11.4485	3.51709	0.00104817	0.0151185	Up
T303_05325	0.370813	-1.43124	0.00106227	0.0151932	Down
T303_05435	3.01273	1.59107	0.0011174	0.0157105	Up
T303_06520	2.43409	1.28338	0.00112613	0.0157105	Up
T303_09790	0.518321	-0.948083	0.0011522	0.0159434	Down
T303_00910	3.73507	1.90114	0.00116749	0.0160248	Up
T303_07520	3.29865	1.72188	0.00124224	0.0168473	Up
T303_07475	2.85816	1.51509	0.00125283	0.0168473	Up
T303_06430	2.72744	1.44755	0.00126918	0.0168473	Up
T303_05735	2.19344	1.13319	0.00130957	0.0170144	Up
T303_02190	2.42009	1.27506	0.00137653	0.0173545	Up
T303_01465	2.21672	1.14843	0.00136101	0.0173545	Up
T303_02215	0.575436	-0.797272	0.00134842	0.0173545	Down
T303_05320	0.332006	-1.59072	0.00137237	0.0173545	Down
T303_04775	1.9983	0.998772	0.00140293	0.017429	Up
T303_06555	0.593151	-0.753528	0.00139762	0.017429	Down
T303_06970	8.10872	3.01947	0.00142418	0.0174385	Up
T303_07565	4.00989	2.00356	0.0014153	0.0174385	Up
T303_02000	3.50362	1.80885	0.00144757	0.0175922	Up
T303_02150	1.73564	0.795467	0.0014574	0.0175922	Up
T303_05925	2.21124	1.14485	0.00148959	0.0178541	Up
T303_02180	0.486882	-1.03836	0.00155698	0.0183382	Down
T303_03395	2.59596	1.37627	0.00159265	0.0185664	Up
T303_08130	3.06016	1.61361	0.00162073	0.0186416	Up
T303_08795	2.8815	1.52682	0.00166983	0.0186416	Up
T303_07935	2.21996	1.15053	0.00167577	0.0186416	Up
T303_09470	0.497923	-1.00601	0.00164508	0.0186416	Down
T303_08460	0.418359	-1.25719	0.00166515	0.0186416	Down
T303_07980	3.88165	1.95667	0.00171769	0.0188872	Up
T303_06560	0.590878	-0.759069	0.00172005	0.0188872	Down
T303_04200	2.85062	1.51127	0.0018002	0.0196406	Up
T303_05915	0.471349	-1.08513	0.00182086	0.0197395	Down
T303_06965	7.62434	2.93061	0.00189274	0.0198762	Up
T303_03445	3.47827	1.79837	0.00191521	0.0198762	Up
T303_02800	2.13331	1.0931	0.00191518	0.0198762	Up
T303_03810	1.96302	0.973074	0.00189572	0.0198762	Up
T303_06950	3.53751	1.82273	0.00211084	0.0213071	Up
T303_02790	1.97174	0.979472	0.0021264	0.0213071	Up
T303_07015	3.22793	1.69061	0.00221272	0.0218655	Up
T303_07650	3.52307	1.81683	0.00229304	0.0220495	Up
T303_02220	0.570338	-0.810112	0.00233286	0.0223063	Down
T303_04770	2.22195	1.15183	0.00250784	0.0236748	Up
T303_02825	0.493782	-1.01805	0.0025177	0.0236748	Down
T303_08985	9.51493	3.25019	0.00265548	0.0246974	Up
T303_03845	2.86336	1.51771	0.00264503	0.0246974	Up
T303_00815	0.561339	-0.833056	0.00270865	0.025055	Down
T303_04450	0.595464	-0.747914	0.00277729	0.0252778	Down
T303_02020	0.254042	-1.97686	0.00276939	0.0252778	Down
T303_08995	2.25856	1.1754	0.00284339	0.0256056	Up
T303_08830	0.454481	-1.13771	0.0028425	0.0256056	Down
T303_04900	0.6142	-0.703219	0.00286478	0.0256624	Down
T303_06090	6.48223	2.69649	0.00301335	0.0260341	Up
T303_09370	4.54779	2.18517	0.00295682	0.0260341	Up
T303_02890	4.27709	2.09663	0.00292585	0.0260341	Up
T303_00150	3.01836	1.59377	0.00297102	0.0260341	Up
T303_03715	0.515214	-0.956757	0.0029772	0.0260341	Down
T303_07740	2.24145	1.16443	0.00319419	0.0273191	Up
T303_00330	3.59978	1.84791	0.0033738	0.0281529	Up
T303_09365	2.77473	1.47235	0.00335816	0.0281529	Up
T303_02545	1.94997	0.963449	0.00336608	0.0281529	Up
T303_05220	2.76453	1.46703	0.00342115	0.0284039	Up
T303_03240	0.6084	-0.716907	0.00355097	0.0293386	Down
T303_06960	6.1715	2.62562	0.00358842	0.0295048	Up
T303_03850	2.41125	1.26978	0.00366053	0.029953	Up
T303_06145	2.8598	1.51591	0.00369448	0.0300353	Up
T303_09300	0.448882	-1.15559	0.00376762	0.030391	Down
T303_03320	2.40281	1.26472	0.00385601	0.0308118	Up
T303_00785	2.61924	1.38915	0.00391013	0.0309537	Up
T303_02795	2.17432	1.12056	0.00393677	0.0310203	Up
T303_08990	2.23136	1.15792	0.00402224	0.0310386	Up
T303_03275	0.645804	-0.630832	0.00403124	0.0310386	Down
T303_02210	0.634569	-0.656151	0.00404852	0.0310386	Down
T303_02385	0.525956	-0.926985	0.00402561	0.0310386	Down
T303_01615	2.84704	1.50946	0.00412838	0.031509	Up
T303_03970	0.653155	-0.614502	0.00419324	0.0318612	Down
T303_05705	0.586788	-0.769088	0.00421806	0.0319073	Down
T303_06150	2.45772	1.29732	0.00429219	0.032182	Up
T303_08635	2.25388	1.17241	0.00446768	0.0332052	Up
T303_09460	0.554641	-0.850375	0.00452599	0.0334924	Down
T303_02045	3.35989	1.74842	0.00457078	0.0336773	Up
T303_04190	2.96499	1.56803	0.00463802	0.0338147	Up
T303_09545	2.43197	1.28212	0.00468876	0.0338147	Up
T303_03330	2.11772	1.08251	0.00466907	0.0338147	Up
T303_05740	1.89292	0.920613	0.00464662	0.0338147	Up
T303_01290	2.16146	1.11201	0.00491751	0.0347572	Up
T303_03170	1.74561	0.803732	0.00484396	0.0347572	Up
T303_08625	1.49841	0.583437	0.00488981	0.0347572	Up
T303_00760	0.646603	-0.629048	0.00492155	0.0347572	Down
T303_09090	1.73429	0.794349	0.00495818	0.0348712	Up
T303_00260	2.53359	1.34118	0.00500624	0.0349206	Up
T303_07460	1.61227	0.689095	0.00500506	0.0349206	Up
T303_04435	0.62189	-0.685268	0.0051132	0.0354426	Down
T303_08620	1.51569	0.599973	0.00522569	0.0358634	Up
T303_01635	0.620284	-0.688998	0.00539472	0.0367273	Down
T303_04180	3.73105	1.89958	0.00556209	0.0374854	Up
T303_07470	2.84403	1.50794	0.00558294	0.0374854	Up
T303_09795	0.566595	-0.819609	0.00559418	0.0374854	Down
T303_03060	0.558281	-0.840936	0.00553639	0.0374854	Down
T303_04550	2.06982	1.0495	0.00564857	0.0375102	Up
T303_03585	0.597986	-0.741816	0.005664	0.0375102	Down
T303_03345	2.6204	1.38979	0.00599616	0.0387599	Up
T303_07915	2.25846	1.17534	0.00600286	0.0387599	Up
T303_01975	4.26593	2.09286	0.00611442	0.0391231	Up
T303_08225	1.83793	0.878081	0.00630812	0.0397926	Up
T303_06480	2.87968	1.52591	0.00637712	0.0398571	Up
T303_05250	1.67395	0.743259	0.00639306	0.0398571	Up
T303_01910	3.82298	1.9347	0.0064421	0.0400163	Up
T303_09495	2.73874	1.45351	0.00659135	0.0404999	Up
T303_04205	1.51895	0.603072	0.00666223	0.0407882	Up
T303_04615	9.06546	3.18038	0.00688683	0.0410821	Up
T303_02675	4.00212	2.00077	0.00690334	0.0410821	Up
T303_08440	2.73429	1.45117	0.00688055	0.0410821	Up
T303_02560	1.53669	0.619827	0.00687703	0.0410821	Up
T303_03500	0.468916	-1.0926	0.00682563	0.0410821	Down
T303_08110	1.77209	0.825455	0.00709589	0.0420808	Up
T303_01990	2.44774	1.29145	0.00722773	0.0422735	Up
T303_05885	1.88183	0.912136	0.0071781	0.0422735	Up
T303_08015	0.59334	-0.753068	0.00721946	0.0422735	Down
T303_07695	1.84316	0.882179	0.00727273	0.0422889	Up
T303_01960	0.648355	-0.625144	0.00732975	0.0422889	Down
T303_06315	0.585053	-0.77336	0.00731396	0.0422889	Down
T303_06695	0.560089	-0.836271	0.00728742	0.0422889	Down
T303_00455	1.85867	0.894272	0.00738727	0.0423338	Up
T303_02970	1.85262	0.88957	0.00752531	0.0427712	Up
T303_05395	1.8193	0.863383	0.00758735	0.0427712	Up
T303_08610	1.58113	0.660954	0.00763039	0.0427712	Up
T303_08825	0.484823	-1.04447	0.00758097	0.0427712	Down
T303_09720	0.341956	-1.54812	0.0076395	0.0427712	Down
T303_01285	1.97848	0.98439	0.00773417	0.042878	Up
T303_04995	0.565225	-0.823103	0.00771439	0.042878	Down
T303_03980	3.32662	1.73406	0.00783722	0.0432342	Up
T303_07990	1.46052	0.546482	0.00784921	0.0432342	Up
T303_07420	0.613203	-0.705563	0.00788898	0.043313	Down
T303_04495	0.634711	-0.655828	0.00803342	0.0439642	Down
T303_07730	3.8465	1.94355	0.00816947	0.0441401	Up
T303_03975	3.13757	1.64965	0.0081576	0.0441401	Up
T303_03340	2.1049	1.07375	0.00811924	0.0441401	Up
T303_01115	0.575655	-0.796724	0.00823491	0.0441401	Down
T303_01785	0.440337	-1.18332	0.00824093	0.0441401	Down
T303_09070	1.76167	0.816947	0.00828592	0.0442089	Up
T303_04685	8.3647	3.06431	0.00867137	0.0461208	Up
T303_03965	0.639818	-0.644268	0.00893403	0.0472227	Down
T303_05195	2.21771	1.14907	0.0092305	0.0481911	Up
T303_08325	1.84562	0.884104	0.00926298	0.0482128	Up
T303_01080	0.515389	-0.956267	0.00929393	0.0482264	Down
T303_05105	2.5486	1.3497	0.00936275	0.0484359	Up
T303_00770	0.656632	-0.606844	0.00943009	0.0484895	Down
T303_08330	1.7383	0.797675	0.00947086	0.0485524	Up
T303_07920	2.74957	1.45921	0.00970605	0.0493335	Up
T303_07260	2.40134	1.26384	0.00975687	0.0493335	Up
T303_02540	1.75379	0.810479	0.00967239	0.0493335	Up
T303_08345	0.598483	-0.740617	0.00976815	0.0493335	Down
T303_07280	0.179271	-2.47978	0.0097163	0.0493335	Down
T303_05875	1.86744	0.901065	0.0100653	0.0506838	No
T303_00925	0.40798	-1.29343	0.0101287	0.0508528	No
T303_05880	1.85701	0.892985	0.0104194	0.0518532	No
T303_08650	0.578288	-0.790139	0.0105757	0.0520226	No
T303_09275	1.75231	0.809256	0.0106358	0.0521673	No
T303_07550	4.42868	2.14688	0.0108001	0.0526696	No
T303_01470	0.603058	-0.729631	0.0110088	0.0535342	No
T303_04525	0.657176	-0.605649	0.0115663	0.0556442	No
T303_04735	1.77575	0.828427	0.0115735	0.0556442	No
[truncated: 924 more rows]

## Sheet: Cd4 vs Cd1
Locus_tag	Fold change	Log2 fold-change	p-value	q-value (adjusted p-value)	DEGs (based on q-value)	Detected in Proteome	Proteome_Log2_FCmedian
[truncated: 1,702 more rows]

[truncated: 2 more sheets: Cd3 vs Cd2, Cd4 vs Cd2]
