# Supplementary material for: Functional Genomic Analyses of Exopolysaccharide-Producing Streptococcus thermophilus ASCC 1275 in Response to Milk Fermentation Conditions
Source: Front Microbiol. 2019 Aug 23;10:1975. doi: 10.3389/fmicb.2019.01975 (PMC6716118; doi:10.3389/fmicb.2019.01975)
Supplement: TABLE S2 — List of proteomic analysis results including DEPs from comparisons between two selected conditions. [file Table_2.XLSX]

## Sheet: functional classification
Locus_tag	GenBank_annotation	KEGG orthology number	ko annotation abbreviation	ko description	COG function	COG category	COG description	PANTHER accession for pathway enrichment analysis
T303_00005	DNA-binding protein	K06346	jag	spoIIIJ-associated protein	COG1847	R	General function prediction only	PTHR35800:SF1
T303_00010	preprotein translocase subunit YidC	K03217	yidC, spoIIIJ, OXA1, ccfA	YidC/Oxa1 family membrane protein insertase	not assigned	not assigned	not assigned	PTHR12428:SF14
T303_00015	ribonuclease P	K03536	rnpA	ribonuclease P protein component [EC:3.1.26.5]	COG0594	J	Translation, ribosomal structure and biogenesis	PTHR33992:SF1
T303_00020	argininosuccinate lyase	K01755	argH, ASL	argininosuccinate lyase [EC:4.3.2.1]	COG0165	E	Amino acid transport and metabolism	PTHR43814:SF1
T303_00025	argininosuccinate synthase	K01940	argG, ASS1	argininosuccinate synthase [EC:6.3.4.5]	COG0137	E	Amino acid transport and metabolism	PTHR11587:SF2
T303_00030	glutamyl-tRNA synthase	K09698	gltX	nondiscriminating glutamyl-tRNA synthetase [EC:6.1.1.24]	COG0008	J	Translation, ribosomal structure and biogenesis	PTHR43311:SF2
T303_00040	50S ribosomal protein L1	K02863	RP-L1, MRPL1, rplA	large subunit ribosomal protein L1	COG0081	J	Translation, ribosomal structure and biogenesis	PTHR36427:SF2
T303_00045	50S ribosomal protein L11	K02867	RP-L11, MRPL11, rplK	large subunit ribosomal protein L11	COG0080	J	Translation, ribosomal structure and biogenesis	PTHR11661:SF7
T303_00050	Integral membrane protein	not assigned	not assigned	not assigned	not assigned	not assigned	not assigned	NOHIT
T303_00055	carbonic anhydrases	K01673	cynT, can	carbonic anhydrase [EC:4.2.1.1]	COG0288	P	Inorganic ion transport and metabolism	PTHR43175
T303_00065	hypothetical protein	not assigned	not assigned	not assigned	not assigned	not assigned	not assigned	NOHIT
T303_00070	DNA repair protein RadA	K04485	radA, sms	DNA repair protein RadA/Sms	COG1066	O	Posttranslational modification, protein turnover, chaperones	PTHR32472:SF10
T303_00075	dUTPase	K01520	dut, DUT	dUTP pyrophosphatase [EC:3.6.1.23]	COG0756	F,V	Nucleotide transport and metabolism	PTHR11241
T303_00095	membrane-bound protein	K16926	htsT	energy-coupling factor transport system substrate-specific component	not assigned	not assigned	not assigned	NOHIT
T303_00100	NAD(P)H-dependent glycerol-3-phosphate dehydrogenase	K00057	gpsA	glycerol-3-phosphate dehydrogenase (NAD(P)+) [EC:1.1.1.94]	COG0240	C	Energy production and conversion	PTHR11728:SF1
T303_00105	UDP glucose pyrophosphorylase	K00963	UGP2, galU, galF	UTP--glucose-1-phosphate uridylyltransferase [EC:2.7.7.9]	COG1210	M	Cell wall/membrane/envelope biogenesis	PTHR43197:SF1
T303_00110	membrane protein	not assigned	not assigned	not assigned	COG0705	O	Posttranslational modification, protein turnover, chaperones	PTHR43731:SF14
T303_00115	5-formyltetrahydrofolate cyclo-ligase	K01934	MTHFS	5-formyltetrahydrofolate cyclo-ligase [EC:6.3.3.2]	COG0212	H	Coenzyme transport and metabolism	PTHR23407:SF1
T303_00120	N-acetyldiaminopimelate deacetylase	K05823	dapL	N-acetyldiaminopimelate deacetylase [EC:3.5.1.47]	COG1473	R	General function prediction only	PTHR11014:SF98
T303_00125	2,3,4,5-tetrahydropyridine-2,6-carboxylate N-succinyltransferase	K00674	dapD	2,3,4,5-tetrahydropyridine-2,6-dicarboxylate N-succinyltransferase[EC:2.3.1.117]	COG2171	E	Amino acid transport and metabolism	PTHR43300:SF4
T303_00130	hypothetical protein	K07025	K07025	putative hydrolase of the HAD superfamily	not assigned	not assigned	not assigned	PTHR46470
T303_00135	haloacid dehalogenase	not assigned	not assigned	not assigned	not assigned	not assigned	not assigned	NOHIT
T303_00140	rRNA (guanine-N1)-methyltransferase	K00563	rlmA1	23S rRNA (guanine745-N1)-methyltransferase [EC:2.1.1.187]	not assigned	not assigned	not assigned	PTHR42912:SF45
T303_00150	hypothetical protein	not assigned	not assigned	not assigned	not assigned	not assigned	not assigned	NOHIT
T303_00155	cytidine/deoxycytidylate deaminase	K11991	tadA	tRNA(adenine34) deaminase [EC:3.5.4.33]	COG0590	J	Translation, ribosomal structure and biogenesis	PTHR11079
T303_00160	single-stranded DNA-binding protein	K03111	ssb	single-strand DNA-binding protein	not assigned	not assigned	not assigned	PTHR10302:SF10
T303_00165	oxidoreductase	not assigned	not assigned	not assigned	COG0425	O	Posttranslational modification, protein turnover, chaperones	PTHR33279
T303_00170	3-isopropylmalate dehydratase large subunit	K07112	K07112	uncharacterized protein	COG2391	R	General function prediction only	PTHR30574:SF1
T303_00175	tRNA-binding protein	K06878	K06878	tRNA-binding protein	COG0073	J	Translation, ribosomal structure and biogenesis	PTHR11586:SF1
T303_00180	thioredoxin	not assigned	not assigned	not assigned	COG0526	O	Posttranslational modification, protein turnover, chaperones	PTHR10438:SF301
T303_00185	membrane protein	not assigned	not assigned	not assigned	not assigned	not assigned	not assigned	NOHIT
T303_00190	glutamyl aminopeptidase	K01261	pepA	glutamyl aminopeptidase [EC:3.4.11.7]	COG1363	E,G	Amino acid transport and metabolism	PTHR32481:SF0
T303_00195	pyrroline-5-carboxylate reductase	K00286	proC	pyrroline-5-carboxylate reductase [EC:1.5.1.2]	COG0345	E	Amino acid transport and metabolism	PTHR11645
T303_00200	CAAX amino terminal protease	K07052	K07052	uncharacterized protein	COG1266	O	Posttranslational modification, protein turnover, chaperones	PTHR43592:SF12
T303_00205	CAAX amino terminal protease	not assigned	not assigned	not assigned	not assigned	not assigned	not assigned	NOHIT
T303_00210	CAAX amino terminal protease	not assigned	not assigned	not assigned	not assigned	not assigned	not assigned	PTHR43592:SF12
T303_00220	acetate kinase	K00925	ackA	acetate kinase [EC:2.7.2.1]	COG0282	C	Energy production and conversion	PTHR21060:SF15
T303_00225	adenine methyltransferase	K00571	E2.1.1.72	site-specific DNA-methyltransferase (adenine-specific) [EC:2.1.1.72]	COG0827	L	Replication, recombination and repair	PTHR33841:SF5
T303_00230	competence protein ComG	not assigned	not assigned	not assigned	not assigned	not assigned	not assigned	NOHIT
T303_00235	competence protein ComG	K02248	comGF	competence protein ComGF	COG4940	X	Mobilome - prophages, transposons	PTHR39583:SF2
T303_00240	Type II secretory pathway, pseudopilin PulG	not assigned	not assigned	not assigned	not assigned	not assigned	not assigned	PTHR38779:SF2
T303_00245	competence protein	K02246	comGD	competence protein ComGD	COG2165	U,N,W	Intracellular trafficking, secretion, and vesicular transport	NOHIT
T303_00250	competence protein ComGC	K02245	comGC	competence protein ComGC	COG4537	X	Mobilome - prophages, transposons	PTHR30093:SF18
T303_00255	competence protein CglB	K02244	comGB	competence protein ComGB	COG1459	U,N,W	Intracellular trafficking, secretion, and vesicular transport	PTHR30012:SF0
T303_00260	competence protein CglA	K02243	comGA	competence protein ComGA	not assigned	not assigned	not assigned	PTHR30258
T303_00265	superoxide dismutase	not assigned	not assigned	not assigned	COG4699	S	Function unknown	NOHIT
T303_00270	DNA-directed RNA polymerase subunit beta'	K03046	rpoC	DNA-directed RNA polymerase subunit beta' [EC:2.7.7.6]	COG0086	K	Transcription	PTHR19376
T303_00275	DNA-directed RNA polymerase subunit beta	K03043	rpoB	DNA-directed RNA polymerase subunit beta [EC:2.7.7.6]	COG0085	K	Transcription	PTHR20856:SF20
T303_00280	penicillin-binding protein 1B	K03693	pbp1b	penicillin-binding protein 1B	COG0744	M	Cell wall/membrane/envelope biogenesis	PTHR32282:SF21
T303_00290	ketol-acid reductoisomerase	K00053	ilvC	ketol-acid reductoisomerase [EC:1.1.1.86]	COG0059	E,H	Amino acid transport and metabolism	PTHR21371:SF1
T303_00295	acetolactate synthase	K01653	E2.2.1.6S, ilvH, ilvN	acetolactate synthase I/III small subunit [EC:2.2.1.6]	COG0440	E	Amino acid transport and metabolism	PTHR30239:SF0
T303_00300	acetolactate synthase	K01652	E2.2.1.6L, ilvB, ilvG, ilvI	acetolactate synthase I/II/III large subunit[EC:2.2.1.6]	COG0028	E,H	Amino acid transport and metabolism	PTHR18968:SF13
T303_00310	dihydroxyacetone kinase	K07030	K07030	uncharacterized protein	COG1461	R	General function prediction only	PTHR33434:SF4
T303_00315	hypothetical protein	not assigned	not assigned	not assigned	COG1302	S	Function unknown	PTHR34297:SF2
T303_00320	sodium:solute antiporter	not assigned	not assigned	not assigned	COG0534	V	Defense mechanisms	PTHR43549:SF1
T303_00325	threonine synthase	K01733	thrC	threonine synthase [EC:4.2.3.1]	COG0498	E	Amino acid transport and metabolism	PTHR43515:SF2
T303_00330	hypothetical protein	not assigned	not assigned	not assigned	not assigned	not assigned	not assigned	NOHIT
T303_00350	endopeptidase	K07386	pepO	putative endopeptidase [EC:3.4.24.-]	COG3590	O	Posttranslational modification, protein turnover, chaperones	PTHR11733:SF197
T303_00355	glutamate racemase	K01226	treC	trehalose-6-phosphate hydrolase [EC:3.2.1.93]	not assigned	not assigned	not assigned	PTHR10357:SF184
T303_00360	alpha-amylase	K01226	treC	trehalose-6-phosphate hydrolase [EC:3.2.1.93]	not assigned	not assigned	not assigned	PTHR10357:SF184
T303_00365	alpha,alpha-phosphotrehalase	K01226	treC	trehalose-6-phosphate hydrolase [EC:3.2.1.93]	not assigned	not assigned	not assigned	PTHR10357:SF179
T303_00370	hypothetical protein	not assigned	not assigned	not assigned	not assigned	not assigned	not assigned	PTHR10357:SF179
T303_00380	GntR family transcriptional regulator	K03486	treR2, treR	GntR family transcriptional regulator, trehalose operon transcriptional repressor	not assigned	not assigned	not assigned	PTHR43488:SF1
T303_00385	trehalose operon transcriptional repressor	K03486	treR2, treR	GntR family transcriptional regulator, trehalose operon transcriptional repressor	not assigned	not assigned	not assigned	PTHR43488:SF1
T303_00390	hypothetical protein	not assigned	not assigned	not assigned	COG4475	S	Function unknown	NOHIT
T303_00395	hypothetical protein	not assigned	not assigned	not assigned	not assigned	not assigned	not assigned	NOHIT
T303_00410	DNA recombinase	not assigned	not assigned	not assigned	not assigned	not assigned	not assigned	PTHR30349:SF53
T303_00415	hypothetical protein	not assigned	not assigned	not assigned	not assigned	not assigned	not assigned	NOHIT
T303_00420	ArsR family transcriptional regulator	not assigned	not assigned	not assigned	COG0640	K	Transcription	PTHR33154:SF18
T303_00425	cadmium transporter	K01534	zntA	Cd2+/Zn2+-exporting ATPase [EC:3.6.3.3 3.6.3.5]	COG2217	P	Inorganic ion transport and metabolism	PTHR43338:SF1
T303_00435	restriction endonuclease subunit M	K03427	hsdM	type I restriction enzyme M protein [EC:2.1.1.72]	COG0286	V	Defense mechanisms	PTHR42933:SF1
T303_00445	DNA-binding protein	not assigned	not assigned	not assigned	not assigned	not assigned	not assigned	NOHIT
T303_00455	transposase IS905	not assigned	not assigned	not assigned	COG3328	X	Mobilome - prophages, transposons	PTHR33217
T303_00465	fructose-1,6-bisphosphate aldolase	K01624	FBA, fbaA	fructose-bisphosphate aldolase, class II [EC:4.1.2.13]	COG0191	G	Carbohydrate transport and metabolism	PTHR30304:SF0
T303_00470	tRNA Leu	K14228	tRNA-Leu	tRNA Leu	not assigned	not assigned	not assigned	NOHIT
T303_00485	transposase ISApl1	not assigned	not assigned	not assigned	not assigned	not assigned	not assigned	PTHR10948:SF23
T303_00490	50S ribosomal protein L17	K02879	RP-L17, MRPL17, rplQ	large subunit ribosomal protein L17	COG0203	J	Translation, ribosomal structure and biogenesis	PTHR14413
T303_00495	DNA-directed RNA polymerase subunit alpha	K03040	rpoA	DNA-directed RNA polymerase subunit alpha [EC:2.7.7.6]	COG0202	K	Transcription	PTHR32108:SF0
T303_00500	30S ribosomal protein S11	K02948	RP-S11, MRPS11, rpsK	small subunit ribosomal protein S11	COG0100	J	Translation, ribosomal structure and biogenesis	PTHR11759:SF13
T303_00505	30S ribosomal protein S13	K02952	RP-S13, rpsM	small subunit ribosomal protein S13	COG0099	J	Translation, ribosomal structure and biogenesis	PTHR10871:SF1
T303_00510	50S ribosomal protein L36	K02919	RP-L36, MRPL36, rpmJ	large subunit ribosomal protein L36	COG0257	J	Translation, ribosomal structure and biogenesis	PTHR42888:SF1
T303_00515	translation initiation factor IF-1	K02518	infA	translation initiation factor IF-1	COG0361	J	Translation, ribosomal structure and biogenesis	PTHR33370:SF1
T303_00520	adenylate kinase	K00939	adk, AK	adenylate kinase [EC:2.7.4.3]	COG0563	F	Nucleotide transport and metabolism	PTHR23359:SF22
T303_00525	preprotein translocase subunit SecY	K03076	secY	preprotein translocase subunit SecY	COG0201	U	Intracellular trafficking, secretion, and vesicular transport	PTHR10906:SF2
T303_00530	50S ribosomal protein L15	K02876	RP-L15, MRPL15, rplO	large subunit ribosomal protein L15	COG0200	J	Translation, ribosomal structure and biogenesis	PTHR12934:SF11
T303_00535	50S ribosomal protein L30	K02907	RP-L30, MRPL30, rpmD	large subunit ribosomal protein L30	COG1841	J	Translation, ribosomal structure and biogenesis	PTHR15892:SF2
T303_00540	30S ribosomal protein S5	K02988	RP-S5, MRPS5, rpsE	small subunit ribosomal protein S5	COG0098	J	Translation, ribosomal structure and biogenesis	PTHR13718:SF61
T303_00545	50S ribosomal protein L18	K02881	RP-L18, MRPL18, rplR	large subunit ribosomal protein L18	COG0256	J	Translation, ribosomal structure and biogenesis	PTHR12899:SF3
T303_00550	50S ribosomal protein L6	K02933	RP-L6, MRPL6, rplF	large subunit ribosomal protein L6	COG0097	J	Translation, ribosomal structure and biogenesis	PTHR11655:SF14
T303_00555	30S ribosomal protein S8	K02994	RP-S8, rpsH	small subunit ribosomal protein S8	COG0096	J	Translation, ribosomal structure and biogenesis	PTHR11758:SF20
T303_00560	30S ribosomal protein S14	K02954	RP-S14, MRPS14, rpsN	small subunit ribosomal protein S14	COG0199	J	Translation, ribosomal structure and biogenesis	PTHR19836:SF24
T303_00565	50S ribosomal protein L5	K02931	RP-L5, MRPL5, rplE	large subunit ribosomal protein L5	COG0094	J	Translation, ribosomal structure and biogenesis	PTHR11994:SF4
T303_00570	50S ribosomal protein L24	K02895	RP-L24, MRPL24, rplX	large subunit ribosomal protein L24	COG0198	J	Translation, ribosomal structure and biogenesis	PTHR12903
T303_00575	50S ribosomal protein L14	K02874	RP-L14, MRPL14, rplN	large subunit ribosomal protein L14	COG0093	J	Translation, ribosomal structure and biogenesis	PTHR11761:SF3
T303_00580	30S ribosomal protein S17	K02961	RP-S17, MRPS17, rpsQ	small subunit ribosomal protein S17	COG0186	J	Translation, ribosomal structure and biogenesis	PTHR10744:SF1
T303_00585	50S ribosomal protein L29	K02904	RP-L29, rpmC	large subunit ribosomal protein L29	COG0255	J	Translation, ribosomal structure and biogenesis	PTHR10916:SF0
T303_00590	50S ribosomal protein L16	K02878	RP-L16, MRPL16, rplP	large subunit ribosomal protein L16	COG0197	J	Translation, ribosomal structure and biogenesis	PTHR12220:SF13
T303_00595	30S ribosomal protein S3	K02982	RP-S3, rpsC	small subunit ribosomal protein S3	COG0092	J	Translation, ribosomal structure and biogenesis	PTHR11760:SF19
T303_00600	50S ribosomal protein L22	K02890	RP-L22, MRPL22, rplV	large subunit ribosomal protein L22	COG0091	J	Translation, ribosomal structure and biogenesis	PTHR13501:SF8
T303_00605	30S ribosomal protein S19	K02965	RP-S19, rpsS	small subunit ribosomal protein S19	COG0185	J	Translation, ribosomal structure and biogenesis	PTHR11880:SF9
T303_00610	50S ribosomal protein L2	K02886	RP-L2, MRPL2, rplB	large subunit ribosomal protein L2	COG0090	J	Translation, ribosomal structure and biogenesis	PTHR13691:SF5
T303_00615	50S ribosomal protein L23	K02892	RP-L23, MRPL23, rplW	large subunit ribosomal protein L23	COG0089	J	Translation, ribosomal structure and biogenesis	PTHR11620:SF55
T303_00620	50S ribosomal protein L4	K02926	RP-L4, MRPL4, rplD	large subunit ribosomal protein L4	COG0088	J	Translation, ribosomal structure and biogenesis	PTHR10746
T303_00625	50S ribosomal protein L3	K02906	RP-L3, MRPL3, rplC	large subunit ribosomal protein L3	COG0087	J	Translation, ribosomal structure and biogenesis	PTHR11229:SF8
T303_00630	30S ribosomal protein S10	K02946	RP-S10, MRPS10, rpsJ	small subunit ribosomal protein S10	COG0051	J	Translation, ribosomal structure and biogenesis	PTHR11700:SF9
T303_00635	Holliday junction DNA helicase RuvB	K03551	ruvB	holliday junction DNA helicase RuvB [EC:3.6.4.12]	COG2255	L	Replication, recombination and repair	PTHR42848:SF1
T303_00640	acyltransferase	not assigned	not assigned	not assigned	COG1835	M	Cell wall/membrane/envelope biogenesis	PTHR23028:SF53
T303_00645	membrane protein	not assigned	not assigned	not assigned	not assigned	not assigned	not assigned	PTHR23084:SF123
T303_00650	phosphotyrosine protein phosphatase	K01104	E3.1.3.48	protein-tyrosine phosphatase [EC:3.1.3.48]	COG0394	T	Signal transduction mechanisms	PTHR11717
T303_00655	adenylosuccinate synthetase	K01939	purA, ADSS	adenylosuccinate synthase [EC:6.3.4.4]	COG0104	F	Nucleotide transport and metabolism	PTHR11846:SF0
T303_00660	topology modulation protein	not assigned	not assigned	not assigned	COG0563	F	Nucleotide transport and metabolism	PTHR37816:SF1
T303_00665	multidrug-efflux transporter	not assigned	not assigned	not assigned	not assigned	not assigned	not assigned	PTHR23530:SF1
T303_00670	bacteriocin biosynthesis protein	not assigned	not assigned	not assigned	COG0476	H	Coenzyme transport and metabolism	PTHR10953:SF102
T303_00685	ABC transporter ATP-binding protein	not assigned	not assigned	not assigned	COG1132	V	Defense mechanisms	PTHR24221:SF424
T303_00690	hypothetical protein	not assigned	not assigned	not assigned	not assigned	not assigned	not assigned	PTHR37038
T303_00695	MutR family transcriptional regulator	not assigned	not assigned	not assigned	not assigned	not assigned	not assigned	PTHR37038:SF12
T303_00700	hypothetical protein	not assigned	not assigned	not assigned	not assigned	not assigned	not assigned	NOHIT
T303_00710	ABC transporter ATP-binding protein	not assigned	not assigned	not assigned	COG1132	V	Defense mechanisms	PTHR24222
T303_00720	hypothetical protein	not assigned	not assigned	not assigned	not assigned	not assigned	not assigned	NOHIT
T303_00730	replication initiator protein	not assigned	not assigned	not assigned	not assigned	not assigned	not assigned	NOHIT
T303_00735	hypothetical protein	not assigned	not assigned	not assigned	not assigned	not assigned	not assigned	NOHIT
T303_00740	integrase	not assigned	not assigned	not assigned	not assigned	not assigned	not assigned	PTHR30349:SF55
T303_00745	tRNA Lys	K14229	tRNA-Lys	tRNA Lys	not assigned	not assigned	not assigned	NOHIT
T303_00750	recombinase RarA	K07478	ycaJ	putative ATPase	COG2256	L	Replication, recombination and repair	PTHR13779:SF7
T303_00755	50S ribosomal protein L28	K02902	RP-L28, MRPL28, rpmB	large subunit ribosomal protein L28	COG0227	J	Translation, ribosomal structure and biogenesis	PTHR39080:SF1
T303_00760	hypothetical protein	not assigned	not assigned	not assigned	COG4472	S	Function unknown	PTHR40067:SF1
T303_00765	Holliday junction resolvase	K07447	ruvX	putative holliday junction resolvase [EC:3.1.-.-]	COG0816	K	Transcription	PTHR33317:SF1
T303_00770	hypothetical protein	not assigned	not assigned	not assigned	COG3906	S	Function unknown	PTHR40066:SF1
T303_00775	4-amino-4-deoxy-L-arabinose transferase glycosyltransferase-like protein of PMT family	not assigned	not assigned	not assigned	not assigned	not assigned	not assigned	NOHIT
T303_00780	ribonucleoside triphosphate reductase	K21636	nrdD	ribonucleoside-triphosphate reductase (formate) [EC:1.1.98.6]	COG1328	F	Nucleotide transport and metabolism	PTHR21075:SF0
T303_00785	hypothetical protein	not assigned	not assigned	not assigned	not assigned	not assigned	not assigned	NOHIT
T303_00790	GNAT family acetyltransferase	not assigned	not assigned	not assigned	COG3981	R	General function prediction only	PTHR39173:SF1
T303_00795	anaerobic ribonucleoside-triphosphate reductase activating protein	K04068	nrdG	anaerobic ribonucleoside-triphosphate reductase activating protein[EC:1.97.1.4]	COG0602	R	General function prediction only	PTHR30352:SF2
T303_00800	hypothetical protein	K09861	K09861	uncharacterized protein	COG3022	P	Inorganic ion transport and metabolism	PTHR30283:SF3
T303_00805	tyrosyl-tRNA synthetase	not assigned	not assigned	not assigned	COG1284	S	Function unknown	PTHR33545:SF8
T303_00810	aspartyl-tRNA synthetase	K01876	aspS	aspartyl-tRNA synthetase [EC:6.1.1.12]	COG0173	J	Translation, ribosomal structure and biogenesis	PTHR22594:SF5
T303_00815	hypothetical protein	not assigned	not assigned	not assigned	not assigned	not assigned	not assigned	NOHIT
T303_00820	histidyl-tRNA synthase	K01892	HARS, hisS	histidyl-tRNA synthetase [EC:6.1.1.21]	COG0124	J	Translation, ribosomal structure and biogenesis	PTHR43707:SF1
T303_00830	methionine synthase	not assigned	not assigned	not assigned	not assigned	not assigned	not assigned	PTHR43844:SF1
T303_00835	50S ribosomal protein L32	K02911	RP-L32, MRPL32, rpmF	large subunit ribosomal protein L32	COG0333	J	Translation, ribosomal structure and biogenesis	PTHR35534:SF1
T303_00840	50S ribosomal protein L33	K02913	RP-L33, MRPL33, rpmG	large subunit ribosomal protein L33	COG0267	J	Translation, ribosomal structure and biogenesis	PTHR43168:SF2
T303_00860	hypothetical protein	not assigned	not assigned	not assigned	not assigned	not assigned	not assigned	NOHIT
T303_00865	Transglycosylase associated protein	not assigned	not assigned	not assigned	COG2261	R	General function prediction only	PTHR33884:SF3
T303_00870	membrane protein	not assigned	not assigned	not assigned	not assigned	not assigned	not assigned	NOHIT
T303_00875	membrane protein	not assigned	not assigned	not assigned	COG5547	S	Function unknown	NOHIT
T303_00880	General stress regulator, Gls24 family	not assigned	not assigned	not assigned	COG1302	S	Function unknown	PTHR34297:SF3
T303_00885	hypothetical protein	not assigned	not assigned	not assigned	not assigned	not assigned	not assigned	PTHR34977:SF1
T303_00910	hypothetical protein	not assigned	not assigned	not assigned	not assigned	not assigned	not assigned	NOHIT
T303_00915	membrane protein	K01421	yhgE	putative membrane protein	COG1511	S	Function unknown	PTHR43077:SF5
T303_00920	TetR family transcriptional regulator	not assigned	not assigned	not assigned	COG1309	K	Transcription	PTHR43479
T303_00925	membrane protein	K08987	K08987	putative membrane protein	COG3759	S	Function unknown	PTHR38446:SF1
T303_00935	30S ribosomal protein S4	K02986	RP-S4, rpsD	small subunit ribosomal protein S4	COG0522	J	Translation, ribosomal structure and biogenesis	PTHR11831:SF4
T303_00940	hypothetical protein	not assigned	not assigned	not assigned	COG4466	S	Function unknown	PTHR40026:SF1
T303_00945	DNA helicase	K02314	dnaB	replicative DNA helicase [EC:3.6.4.12]	COG0305	L	Replication, recombination and repair	PTHR30153:SF2
T303_00950	50S ribosomal protein L9	K02939	RP-L9, MRPL9, rplI	large subunit ribosomal protein L9	COG0359	J	Translation, ribosomal structure and biogenesis	PTHR21368:SF18
T303_00955	DHH family phosphoesterase	not assigned	not assigned	not assigned	COG3887	T	Signal transduction mechanisms	PTHR12112:SF18
T303_00960	tRNA uridine 5-carboxymethylaminomethyl modification protein	K03495	gidA, mnmG, MTO1	tRNA uridine 5-carboxymethylaminomethyl modification enzyme	COG0445	J	Translation, ribosomal structure and biogenesis	PTHR11806:SF0
T303_00965	NUDIX hydrolase	not assigned	not assigned	not assigned	COG1051	F	Nucleotide transport and metabolism	PTHR43046
T303_00970	thiouridylase	K00566	mnmA, trmU	tRNA-uridine 2-sulfurtransferase [EC:2.8.1.13]	COG0482	J	Translation, ribosomal structure and biogenesis	PTHR11933:SF5
T303_00975	membrane protein	not assigned	not assigned	not assigned	not assigned	not assigned	not assigned	NOHIT
T303_00980	hypothetical protein	not assigned	not assigned	not assigned	not assigned	not assigned	not assigned	NOHIT
T303_00985	peptidoglycan-binding protein LysM	not assigned	not assigned	not assigned	not assigned	not assigned	not assigned	PTHR33734:SF12
T303_00990	transporter	K16785	ecfT	energy-coupling factor transport system permease protein	COG0619	H	Coenzyme transport and metabolism	PTHR33514:SF4
T303_00995	cobalt ABC transporter ATP-binding protein	K16787	ecfA2	energy-coupling factor transport system ATP-binding protein [EC:3.6.3.-]	COG1122	P,R	Inorganic ion transport and metabolism	PTHR43553:SF8
T303_01000	cobalt ABC transporter ATP-binding protein	K16786	ecfA1	energy-coupling factor transport system ATP-binding protein [EC:3.6.3.-]	COG1122	P,R	Inorganic ion transport and metabolism	PTHR43553:SF12
T303_01005	CDP-diacylglycerol--glycerol-3-phosphate 3-phosphatidyltransferase	K00995	pgsA, PGS1	CDP-diacylglycerol---glycerol-3-phosphate 3-phosphatidyltransferase [EC:2.7.8.5]	COG0558	I	Lipid transport and metabolism	PTHR14269:SF11
T303_01010	membrane protein	not assigned	not assigned	not assigned	COG1426	D	Cell cycle control, cell division, chromosome partitioning	PTHR34475:SF1
T303_01015	peptidase M16	not assigned	not assigned	not assigned	COG0612	R	General function prediction only	PTHR11851:SF134
T303_01020	peptidase M16	not assigned	not assigned	not assigned	COG0612	R	General function prediction only	PTHR11851:SF186
T303_01025	hypothetical protein	not assigned	not assigned	not assigned	COG2501	J	Translation, ribosomal structure and biogenesis	PTHR32319:SF3
T303_01030	recombinase RecF	K03629	recF	DNA replication and repair protein RecF	COG1195	L	Replication, recombination and repair	PTHR32182:SF0
T303_01035	inosine 5'-monophosphate dehydrogenase	K00088	IMPDH, guaB	IMP dehydrogenase [EC:1.1.1.205]	COG0516	F	Nucleotide transport and metabolism	PTHR11911:SF111
T303_01040	tryptophanyl-tRNA synthase	K01867	WARS, trpS	tryptophanyl-tRNA synthetase [EC:6.1.1.2]	COG0180	J	Translation, ribosomal structure and biogenesis	PTHR10055:SF9
T303_01045	membrane protein	not assigned	not assigned	not assigned	COG1284	S	Function unknown	PTHR33545
T303_01050	ABC transporter ATP-binding protein	not assigned	not assigned	not assigned	COG0488	R	General function prediction only	PTHR19211:SF96
T303_01055	ABC transporter permease	not assigned	not assigned	not assigned	COG4485	S	Function unknown	PTHR38454:SF1
T303_01060	tRNA Asn	K14220	tRNA-Asn	tRNA Asn	not assigned	not assigned	not assigned	NOHIT
T303_01065	tRNA Glu	K14224	tRNA-Glu	tRNA Glu	not assigned	not assigned	not assigned	NOHIT
T303_01070	tRNA Arg	K14219	tRNA-Arg	tRNA Arg	not assigned	not assigned	not assigned	NOHIT
T303_01080	50S rRNA methyltransferase	K00783	rlmH	23S rRNA (pseudouridine1915-N3)-methyltransferase [EC:2.1.1.177]	COG1576	J	Translation, ribosomal structure and biogenesis	PTHR33603:SF1
T303_01085	serine protease	K04771	degP, htrA	serine protease Do [EC:3.4.21.107]	COG0265	O	Posttranslational modification, protein turnover, chaperones	PTHR43019:SF4
T303_01090	plasmid partitioning protein ParB	K03497	parB, spo0J	chromosome partitioning protein, ParB family	COG1475	D	Cell cycle control, cell division, chromosome partitioning	PTHR33375:SF1
T303_01095	chromosomal replication initiation protein DnaA	K02313	dnaA	chromosomal replication initiator protein	COG0593	L	Replication, recombination and repair	PTHR30050:SF2
T303_01100	DNA polymerase III subunit beta	K02338	dnaN	DNA polymerase III subunit beta [EC:2.7.7.7]	COG0592	L	Replication, recombination and repair	PTHR30478:SF0
T303_01105	hypothetical protein	not assigned	not assigned	not assigned	COG4481	S	Function unknown	PTHR38455:SF1
T303_01110	GTP-binding protein YchF	K06942	ychF	ribosome-binding ATPase	COG0012	J	Translation, ribosomal structure and biogenesis	PTHR23305:SF12
T303_01115	peptidyl-tRNA hydrolase	K01056	PTH1, pth, spoVC	peptidyl-tRNA hydrolase, PTH1 family [EC:3.1.1.29]	COG0193	J	Translation, ribosomal structure and biogenesis	PTHR17224
T303_01120	transcription-repair coupling factor	K03723	mfd	transcription-repair coupling factor (superfamily II helicase) [EC:3.6.4.-]	COG1197	L,K	Replication, recombination and repair	PTHR24029:SF1
T303_01125	hypothetical protein	not assigned	not assigned	not assigned	COG1188	J	Translation, ribosomal structure and biogenesis	PTHR21600:SF19
T303_01130	septum formation initiation protein	K13052	divIC, divA	cell division protein DivIC	COG2919	D	Cell cycle control, cell division, chromosome partitioning	PTHR40027:SF1
T303_01135	recombinase	not assigned	not assigned	not assigned	not assigned	not assigned	not assigned	NOHIT
T303_01140	beta-lactamase	K01467	ampC	beta-lactamase class C [EC:3.5.2.6]	COG2367	V	Defense mechanisms	PTHR35333:SF3
T303_01145	tRNA(Ile)-lysidine synthetase	K04075	tilS, mesJ	tRNA(Ile)-lysidine synthase [EC:6.3.4.19]	COG0037	J	Translation, ribosomal structure and biogenesis	PTHR43033:SF1
T303_01150	hypoxanthine phosphoribosyltransferase	K00760	hprT, hpt, HPRT1	hypoxanthine phosphoribosyltransferase [EC:2.4.2.8]	COG0634	F	Nucleotide transport and metabolism	PTHR43340:SF1
T303_01155	cell division protein FtsH	K03798	ftsH, hflB	cell division protease FtsH [EC:3.4.24.-]	COG0465	O	Posttranslational modification, protein turnover, chaperones	PTHR23076:SF97
T303_01165	transposase	not assigned	not assigned	not assigned	COG2963	X	Mobilome - prophages, transposons	PTHR33795:SF1
T303_01175	transposase	K07497	K07497	putative transposase	not assigned	not assigned	not assigned	PTHR42648:SF3
T303_01180	16S ribosomal RNA	K01977	16SrRNA, rrs	16S ribosomal RNA	not assigned	not assigned	not assigned	NOHIT
T303_01185	tRNA Ala	K14218	tRNA-Ala	tRNA Ala	not assigned	not assigned	not assigned	NOHIT
T303_01190	23S ribosomal RNA	K01980	23SrRNA, rrl	23S ribosomal RNA	not assigned	not assigned	not assigned	NOHIT
T303_01195	5S ribosomal RNA	K01985	5SrRNA, rrf	5S ribosomal RNA	not assigned	not assigned	not assigned	NOHIT
T303_01200	tRNA Val	K14237	tRNA-Val	tRNA Val	not assigned	not assigned	not assigned	NOHIT
T303_01205	tRNA Asp	K14221	tRNA-Asp	tRNA Asp	not assigned	not assigned	not assigned	NOHIT
T303_01210	tRNA Lys	K14229	tRNA-Lys	tRNA Lys	not assigned	not assigned	not assigned	NOHIT
T303_01215	tRNA Leu	K14228	tRNA-Leu	tRNA Leu	not assigned	not assigned	not assigned	NOHIT
T303_01220	tRNA Thr	K14234	tRNA-Thr	tRNA Thr	not assigned	not assigned	not assigned	NOHIT
T303_01225	tRNA Gly	K14225	tRNA-Gly	tRNA Gly	not assigned	not assigned	not assigned	NOHIT
T303_01230	tRNA Leu	K14228	tRNA-Leu	tRNA Leu	not assigned	not assigned	not assigned	NOHIT
T303_01235	tRNA Arg	K14219	tRNA-Arg	tRNA Arg	not assigned	not assigned	not assigned	NOHIT
T303_01240	tRNA Pro	K14232	tRNA-Pro	tRNA Pro	not assigned	not assigned	not assigned	NOHIT
T303_01245	tRNA Met	K14230	tRNA-Met	tRNA Met	not assigned	not assigned	not assigned	NOHIT
T303_01250	tRNA Met	K14230	tRNA-Met	tRNA Met	not assigned	not assigned	not assigned	NOHIT
T303_01255	tRNA Ser	K14233	tRNA-Ser	tRNA Ser	not assigned	not assigned	not assigned	NOHIT
T303_01260	tRNA Met	K14230	tRNA-Met	tRNA Met	not assigned	not assigned	not assigned	NOHIT
T303_01265	tRNA Phe	K14231	tRNA-Phe	tRNA Phe	not assigned	not assigned	not assigned	NOHIT
T303_01270	tRNA Gly	K14225	tRNA-Gly	tRNA Gly	not assigned	not assigned	not assigned	NOHIT
T303_01275	tRNA Ile	K14227	tRNA-Ile	tRNA Ile	not assigned	not assigned	not assigned	NOHIT
T303_01280	tRNA Ser	K14233	tRNA-Ser	tRNA Ser	not assigned	not assigned	not assigned	NOHIT
T303_01285	rod shape-determining protein MreC	K03570	mreC	rod shape-determining protein MreC	COG1792	D	Cell cycle control, cell division, chromosome partitioning	PTHR34138:SF1
T303_01290	rod shape-determining protein MreD	K03571	mreD	rod shape-determining protein MreD	COG2891	M	Cell wall/membrane/envelope biogenesis	NOHIT
T303_01295	glucan binding protein	K21471	cwlO	peptidoglycan DL-endopeptidase CwlO [EC:3.4.-.-]	COG3883	S	Function unknown	PTHR47359:SF2
T303_01300	ribose-phosphate pyrophosphokinase	K00948	PRPS, prsA	ribose-phosphate pyrophosphokinase [EC:2.7.6.1]	COG0462	E,F	Amino acid transport and metabolism	PTHR10210:SF41
T303_01310	aminotransferase A	K00841	patA	ami notransferase [EC:2.6.1.-]	COG0436	E	Amino acid transport and metabolism	PTHR43795:SF24
T303_01315	DNA repair protein RecO	K03584	recO	DNA repair protein RecO (recombination protein O)	COG1381	L	Replication, recombination and repair	PTHR33991:SF1
T303_01320	phosphate acyltransferase	K03621	plsX	glycerol-3-phosphate acyltransferase PlsX [EC:2.3.1.15]	COG0416	I	Lipid transport and metabolism	PTHR30100:SF1
T303_01325	acyl carrier protein	K02078	acpP	acyl carrier protein	COG0236	I,Q	Lipid transport and metabolism	PTHR20863:SF28
T303_01330	phosphoribosylaminoimidazole-succinocarboxamide synthase	K01923	purC	phosphoribosylaminoimidazole-succinocarboxamide synthase [EC:6.3.2.6]	COG0152	F	Nucleotide transport and metabolism	PTHR43599:SF3
T303_01335	phosphoribosylformylglycinamidine synthase	K01952	purL, PFAS	phosphoribosylformylglycinamidine synthase [EC:6.3.5.3]	COG0046	F	Nucleotide transport and metabolism	PTHR10099:SF1
T303_01340	amidophosphoribosyltransferase	K00764	purF, PPAT	amidophosphoribosyltransferase [EC:2.4.2.14]	COG0034	F	Nucleotide transport and metabolism	PTHR11907:SF0
T303_01345	phosphoribosylaminoimidazole synthetase	K01933	purM	phosphoribosylformylglycinamidine cyclo-ligase [EC:6.3.3.1]	COG0150	F	Nucleotide transport and metabolism	PTHR10520
T303_01350	phosphoribosylglycinamide formyltransferase	K11175	purN	phosphoribosylglycinamide formyltransferase 1 [EC:2.1.2.2]	COG0299	F	Nucleotide transport and metabolism	PTHR43369
T303_01355	purine biosynthesis protein purH	K00602	purH	phosphoribosylaminoimidazolecarboxamide formyltransferase / IMP cyclohydrolase [EC:2.1.2.3 3.5.4.10]	COG0138	F	Nucleotide transport and metabolism	PTHR11692:SF0
T303_01360	transposase	not assigned	not assigned	not assigned	COG2963	X	Mobilome - prophages, transposons	PTHR33795:SF1
T303_01375	cell wall protein precursor, choline binding protein	not assigned	not assigned	not assigned	COG3942	M	Cell wall/membrane/envelope biogenesis	NOHIT
T303_01380	phosphoribosylamine--glycine ligase	K01945	purD	phosphoribosylamine---glycine ligase [EC:6.3.4.13]	COG0151	F	Nucleotide transport and metabolism	PTHR43472:SF1
T303_01390	phosphoribosylaminoimidazole carboxylase	K01589	purK	5-(carboxyamino)imidazole ribonucleotide synthase [EC:6.3.4.18]	COG0026	F	Nucleotide transport and metabolism	PTHR11609
T303_01405	adenylosuccinate lyase	K01756	purB, ADSL	adenylosuccinate lyase [EC:4.3.2.2]	COG0015	F	Nucleotide transport and metabolism	PTHR43172:SF1
T303_01410	hypothetical protein	not assigned	not assigned	not assigned	not assigned	not assigned	not assigned	NOHIT
T303_01415	arginyl-tRNA synthetase	K01887	RARS, argS	arginyl-tRNA synthetase [EC:6.1.1.19]	COG0018	J	Translation, ribosomal structure and biogenesis	PTHR11956
T303_01420	arginine repressor ArgR	K03402	argR, ahrC	transcriptional regulator of arginine metabolism	COG1438	K	Transcription	PTHR34471:SF1
T303_01425	hypothetical protein	not assigned	not assigned	not assigned	COG4550	T	Signal transduction mechanisms	PTHR38448:SF1
T303_01430	DNA mismatch repair protein MutS	K03555	mutS	DNA mismatch repair protein MutS	COG0249	L	Replication, recombination and repair	PTHR11361:SF34
T303_01435	hypothetical protein	not assigned	not assigned	not assigned	not assigned	not assigned	not assigned	NOHIT
T303_01440	hisitidine kinase	not assigned	not assigned	not assigned	not assigned	not assigned	not assigned	PTHR37299:SF2
T303_01445	hypothetical protein	not assigned	not assigned	not assigned	not assigned	not assigned	not assigned	NOHIT
T303_01450	DNA mismatch repair protein MutL	K03572	mutL	DNA mismatch repair protein MutL	COG0323	L	Replication, recombination and repair	PTHR10073:SF12
T303_01455	hypothetical protein	not assigned	not assigned	not assigned	not assigned	not assigned	not assigned	NOHIT
T303_01460	Holliday junction DNA helicase RuvA	K03550	ruvA	holliday junction DNA helicase RuvA [EC:3.6.4.12]	COG0632	L	Replication, recombination and repair	PTHR33796:SF1
T303_01465	3-methyladenine DNA glycosylase	K01246	tag	DNA-3-methyladenine glycosylase I [EC:3.2.2.20]	COG2818	L	Replication, recombination and repair	PTHR30037:SF4
T303_01470	damage-inducible protein A	K03742	pncC	nicotinamide-nucleotide amidase [EC:3.5.1.42]	COG1058	R	General function prediction only	PTHR13939:SF0
T303_01475	recombinase RecA	K03553	recA	recombination protein RecA	COG0468	L	Replication, recombination and repair	PTHR45900:SF1
T303_01480	arsenate reductase	not assigned	not assigned	not assigned	COG1393	P	Inorganic ion transport and metabolism	PTHR30041:SF4
T303_01485	16S ribosomal RNA	K01977	16SrRNA, rrs	16S ribosomal RNA	not assigned	not assigned	not assigned	NOHIT
T303_01490	tRNA Ala	K14218	tRNA-Ala	tRNA Ala	not assigned	not assigned	not assigned	NOHIT
T303_01495	23S ribosomal RNA	K01980	23SrRNA, rrl	23S ribosomal RNA	not assigned	not assigned	not assigned	NOHIT
T303_01500	5S ribosomal RNA	K01985	5SrRNA, rrf	5S ribosomal RNA	not assigned	not assigned	not assigned	NOHIT
T303_01505	tRNA Val	K14237	tRNA-Val	tRNA Val	not assigned	not assigned	not assigned	NOHIT
T303_01510	tRNA Gly	K14225	tRNA-Gly	tRNA Gly	not assigned	not assigned	not assigned	NOHIT
T303_01515	tRNA Ile	K14227	tRNA-Ile	tRNA Ile	not assigned	not assigned	not assigned	NOHIT
T303_01520	tRNA Glu	K14224	tRNA-Glu	tRNA Glu	not assigned	not assigned	not assigned	NOHIT
T303_01525	tRNA Ser	K14233	tRNA-Ser	tRNA Ser	not assigned	not assigned	not assigned	NOHIT
T303_01530	tRNA Met	K14230	tRNA-Met	tRNA Met	not assigned	not assigned	not assigned	NOHIT
T303_01535	tRNA Phe	K14231	tRNA-Phe	tRNA Phe	not assigned	not assigned	not assigned	NOHIT
T303_01540	tRNA Tyr	K14236	tRNA-Tyr	tRNA Tyr	not assigned	not assigned	not assigned	NOHIT
T303_01545	tRNA Trp	K14235	tRNA-Trp	tRNA Trp	not assigned	not assigned	not assigned	NOHIT
T303_01550	tRNA His	K14226	tRNA-His	tRNA His	not assigned	not assigned	not assigned	NOHIT
T303_01555	tRNA Gln	K14223	tRNA-Gln	tRNA Gln	not assigned	not assigned	not assigned	NOHIT
T303_01560	tRNA Leu	K14228	tRNA-Leu	tRNA Leu	not assigned	not assigned	not assigned	NOHIT
T303_01565	DNA polymerase III PolC	K03763	polC	DNA polymerase III subunit alpha, Gram-positive type [EC:2.7.7.7]	COG2176	L	Replication, recombination and repair	PTHR23044:SF26
T303_01570	aminopeptidase T	K19689	ampS, pepS, ampT	aminopeptidase [EC:3.4.11.-]	COG2309	E	Amino acid transport and metabolism	PTHR34448:SF3
T303_01575	membrane protein	not assigned	not assigned	not assigned	COG2261	R	General function prediction only	PTHR33884:SF3
T303_01585	MarR family transcriptional regulator	not assigned	not assigned	not assigned	COG1846	K	Transcription	PTHR33164:SF43
T303_01595	transposase	K07497	K07497	putative transposase	not assigned	not assigned	not assigned	PTHR42648:SF3
T303_01600	transposase IS861	not assigned	not assigned	not assigned	not assigned	not assigned	not assigned	PTHR42648:SF3
T303_01605	hypothetical protein	not assigned	not assigned	not assigned	not assigned	not assigned	not assigned	NOHIT
T303_01615	tRNA Cys	K14222	tRNA-Cys	tRNA Cys	not assigned	not assigned	not assigned	NOHIT
T303_01620	30S ribosomal protein S2	K02967	RP-S2, MRPS2, rpsB	small subunit ribosomal protein S2	COG0052	J	Translation, ribosomal structure and biogenesis	PTHR12534:SF0
T303_01625	elongation factor Ts	K02357	tsf, TSFM	elongation factor Ts	COG0264	J	Translation, ribosomal structure and biogenesis	PTHR11741:SF0
T303_01630	small multi-drug export	not assigned	not assigned	not assigned	COG2426	S	Function unknown	PTHR36007:SF1
T303_01635	CtsR family transcriptional regulator	K03708	ctsR	transcriptional regulator of stress and heat shock response	COG4463	K	Transcription	PTHR40028:SF1
T303_01640	ATP-dependent Clp protease ATP-binding protein	K03696	clpC	ATP-dependent Clp protease ATP-binding subunit ClpC	COG0542	O	Posttranslational modification, protein turnover, chaperones	PTHR43572:SF4
T303_01650	D-alanyl-D-alanine carboxypeptidase	K07258	dacC, dacA, dacD	serine-type D-Ala-D-Ala carboxypeptidase (penicillin-binding protein 5/6) [EC:3.4.16.4]	COG1686	M	Cell wall/membrane/envelope biogenesis	PTHR21581:SF11
T303_01655	polynucleotide phosphorylase	K00962	pnp, PNPT1	polyribonucleotide nucleotidyltransferase [EC:2.7.7.8]	COG1185	J	Translation, ribosomal structure and biogenesis	PTHR11252:SF0
T303_01660	hypothetical protein	not assigned	not assigned	not assigned	not assigned	not assigned	not assigned	NOHIT
T303_01665	serine acetyltransferase	K00640	cysE	serine O-acetyltransferase [EC:2.3.1.30]	COG1045	E	Amino acid transport and metabolism	PTHR42811
T303_01670	hypothetical protein	not assigned	not assigned	not assigned	not assigned	not assigned	not assigned	NOHIT
T303_01675	cysteinyl-tRNA synthease	K01883	CARS, cysS	cysteinyl-tRNA synthetase [EC:6.1.1.16]	COG0215	J	Translation, ribosomal structure and biogenesis	PTHR10890:SF21
T303_01680	Mini-ribonuclease 3	K11145	K11145	ribonuclease III family protein [EC:3.1.26.-]	COG1939	J	Translation, ribosomal structure and biogenesis	PTHR34276:SF1
T303_01685	hypothetical protein	not assigned	not assigned	not assigned	not assigned	not assigned	not assigned	NOHIT
T303_01690	hypothetical protein	not assigned	not assigned	not assigned	not assigned	not assigned	not assigned	NOHIT
T303_01695	hypothetical protein	not assigned	not assigned	not assigned	not assigned	not assigned	not assigned	NOHIT
T303_01700	rRNA methyltransferase	K03218	rlmB	23S rRNA (guanosine2251-2'-O)-methyltransferase [EC:2.1.1.185]	COG0566	J	Translation, ribosomal structure and biogenesis	PTHR46429:SF1
T303_01705	hypothetical protein	K06962	K06962	uncharacterized protein	COG3688	R	General function prediction only	PTHR34547:SF1
T303_01710	hypothetical protein	not assigned	not assigned	not assigned	COG1307	I	Lipid transport and metabolism	PTHR33434:SF3
T303_01715	hypothetical protein	not assigned	not assigned	not assigned	not assigned	not assigned	not assigned	PTHR46558
T303_01720	hypothetical protein	not assigned	not assigned	not assigned	not assigned	not assigned	not assigned	NOHIT
T303_01725	2-dehydropantoate 2-reductase	K00077	panE, apbA	2-dehydropantoate 2-reductase [EC:1.1.1.169]	COG1893	H	Coenzyme transport and metabolism	PTHR43765
T303_01730	50S ribosomal protein L13	K02871	RP-L13, MRPL13, rplM	large subunit ribosomal protein L13	COG0102	J	Translation, ribosomal structure and biogenesis	PTHR11545:SF2
T303_01735	30S ribosomal protein S9	K02996	RP-S9, MRPS9, rpsI	small subunit ribosomal protein S9	COG0103	J	Translation, ribosomal structure and biogenesis	PTHR21569:SF1
T303_01740	hypothetical protein	not assigned	not assigned	not assigned	not assigned	not assigned	not assigned	NOHIT
T303_01745	transposase IS1193	not assigned	not assigned	not assigned	COG3464	X	Mobilome - prophages, transposons	PTHR33498:SF1
T303_01750	DNA-binding protein	not assigned	not assigned	not assigned	not assigned	not assigned	not assigned	PTHR40661
T303_01755	bacteriocin	not assigned	not assigned	not assigned	not assigned	not assigned	not assigned	NOHIT
T303_01765	lantibiotic biosynthesis protein	K20484	nisC, spaC, epiC	lantibiotic biosynthesis protein	not assigned	not assigned	not assigned	PTHR12736
T303_01770	lantibiotic transporter	not assigned	not assigned	not assigned	not assigned	not assigned	not assigned	PTHR43266:SF5
T303_01775	ATP-dependent DNA helicase recG	not assigned	not assigned	not assigned	not assigned	not assigned	not assigned	PTHR30595:SF6
T303_01785	Fis family transcriptional regulator	not assigned	not assigned	not assigned	not assigned	not assigned	not assigned	NOHIT
T303_01790	hypothetical protein	not assigned	not assigned	not assigned	not assigned	not assigned	not assigned	NOHIT
T303_01795	hypothetical protein	not assigned	not assigned	not assigned	not assigned	not assigned	not assigned	NOHIT
T303_01800	hypothetical protein	not assigned	not assigned	not assigned	COG3942	M	Cell wall/membrane/envelope biogenesis	NOHIT
T303_01810	metallophosphatase	K07282	capA, pgsA	gamma-polyglutamate biosynthesis protein CapA	COG2843	M	Cell wall/membrane/envelope biogenesis	PTHR33393:SF10
T303_01815	hypothetical protein	K07166	K07166	ACT domain-containing protein	COG3830	T	Signal transduction mechanisms	PTHR34875:SF2
T303_01820	hypothetical protein	K09157	K09157	uncharacterized protein	COG2848	D	Cell cycle control, cell division, chromosome partitioning	PTHR37560:SF3
T303_01825	hypothetical protein	K15634	gpmB	probable phosphoglycerate mutase [EC:5.4.2.12]	not assigned	not assigned	not assigned	PTHR23029:SF83
T303_01830	D-alanyl-D-alanine carboxypeptidase	K07260	vanY	zinc D-Ala-D-Ala carboxypeptidase [EC:3.4.17.14]	COG1876	M	Cell wall/membrane/envelope biogenesis	PTHR34385:SF1
T303_01835	peptidoglycan hydrolase	not assigned	not assigned	not assigned	COG1705	M,N	Cell wall/membrane/envelope biogenesis	PTHR33308:SF8
T303_01840	HrcA family transcriptional regulator	K03705	hrcA	heat-inducible transcriptional repressor	COG1420	K	Transcription	PTHR34824:SF1
T303_01845	heat shock protein GrpE	K03687	GRPE	molecular chaperone GrpE	COG0576	O	Posttranslational modification, protein turnover, chaperones	PTHR21237:SF23
T303_01850	molecular chaperone DnaK	K04043	dnaK, HSPA9	molecular chaperone DnaK	COG0443	O	Posttranslational modification, protein turnover, chaperones	PTHR19375:SF147
T303_01855	molecular chaperone DnaJ	K03686	dnaJ	molecular chaperone DnaJ	COG0484	O	Posttranslational modification, protein turnover, chaperones	PTHR43096:SF34
T303_01860	tRNA pseudouridine synthase A	K06173	truA, PUS1	tRNA pseudouridine38-40 synthase [EC:5.4.99.12]	COG0101	J	Translation, ribosomal structure and biogenesis	PTHR11142:SF0
T303_01865	phosphomethylpyrimidine kinase	K00868	pdxK, pdxY	pyridoxine kinase [EC:2.7.1.35]	COG0351	H	Coenzyme transport and metabolism	PTHR20858:SF19
T303_01870	membrane protein	not assigned	not assigned	not assigned	COG4720	S	Function unknown	PTHR37815
T303_01875	16S ribosomal RNA	K01977	16SrRNA, rrs	16S ribosomal RNA	not assigned	not assigned	not assigned	NOHIT
T303_01880	tRNA Ala	K14218	tRNA-Ala	tRNA Ala	not assigned	not assigned	not assigned	NOHIT
T303_01885	23S ribosomal RNA	K01980	23SrRNA, rrl	23S ribosomal RNA	not assigned	not assigned	not assigned	NOHIT
T303_01890	5S ribosomal RNA	K01985	5SrRNA, rrf	5S ribosomal RNA	not assigned	not assigned	not assigned	NOHIT
T303_01895	tRNA Asn	K14220	tRNA-Asn	tRNA Asn	not assigned	not assigned	not assigned	NOHIT
T303_01900	hypothetical protein	not assigned	not assigned	not assigned	not assigned	not assigned	not assigned	NOHIT
T303_01905	CpsL protein	not assigned	not assigned	not assigned	not assigned	not assigned	not assigned	NOHIT
T303_01910	aminoacylase	not assigned	not assigned	not assigned	not assigned	not assigned	not assigned	PTHR11014:SF121
T303_01915	cyclopropane-fatty-acyl-phospholipid synthase	K00574	cfa	cyclopropane-fatty-acyl-phospholipid synthase [EC:2.1.1.79]	COG2230	I	Lipid transport and metabolism	PTHR43667:SF1
T303_01920	transposase IS1167	not assigned	not assigned	not assigned	not assigned	not assigned	not assigned	PTHR33498:SF1
T303_01925	RNA polymerase sigma70	K12296	comX1_2	competence protein ComX	not assigned	not assigned	not assigned	PTHR30385:SF7
T303_01930	mechanosensitive ion channel protein	K03442	mscS	small conductance mechanosensitive channel	COG0668	M	Cell wall/membrane/envelope biogenesis	PTHR30460:SF0
T303_01935	trigger factor	K03545	tig	trigger factor	COG0544	O	Posttranslational modification, protein turnover, chaperones	PTHR30560:SF3
T303_01940	DNA-directed RNA polymerase subunit delta	K03048	rpoE	DNA-directed RNA polymerase subunit delta	COG3343	K	Transcription	NOHIT
T303_01945	CTP synthetase	K01937	pyrG, CTPS	CTP synthase [EC:6.3.4.2]	COG0504	F	Nucleotide transport and metabolism	PTHR11550:SF0
T303_01950	hypothetical protein	not assigned	not assigned	not assigned	not assigned	not assigned	not assigned	NOHIT
T303_01955	DNA mismatch repair protein MutT	K03574	mutT, NUDT15, MTH2	8-oxo-dGTP diphosphatase [EC:3.6.1.55]	not assigned	not assigned	not assigned	PTHR43736:SF1
T303_01960	ribosomal protein L11 methyltransferase	K02687	prmA	ribosomal protein L11 methyltransferase [EC:2.1.1.-]	COG2264	J	Translation, ribosomal structure and biogenesis	PTHR43648:SF1
T303_01965	16S rRNA methyltransferase	K09761	rsmE	16S rRNA (uracil1498-N3)-methyltransferase [EC:2.1.1.193]	COG1385	J	Translation, ribosomal structure and biogenesis	PTHR30027:SF3
T303_01970	2', 3'-cyclic nucleotide 2'-phosphodiesterase	K01119	cpdB	2',3'-cyclic-nucleotide 2'-phosphodiesterase / 3'-nucleotidase [EC:3.1.4.16 3.1.3.6]	COG0737	F,V	Nucleotide transport and metabolism	PTHR11575:SF6
T303_01975	flavoprotein	K03647	nrdI	protein involved in ribonucleotide reduction	COG1780	F	Nucleotide transport and metabolism	PTHR37297:SF1
T303_01980	GTP pyrophosphokinase	K00951	relA	GTP pyrophosphokinase [EC:2.7.6.5]	COG0317	K,T	Transcription	PTHR21262:SF0
T303_01985	D-tyrosyl-tRNA(Tyr) deacylase	K07560	dtd, DTD	D-aminoacyl-tRNA deacylase [EC:3.1.1.96]	COG1490	J	Translation, ribosomal structure and biogenesis	PTHR10472:SF5
T303_01990	hypothetical protein	not assigned	not assigned	not assigned	not assigned	not assigned	not assigned	NOHIT
T303_02000	1,6-alpha-glucanhydrolase	not assigned	not assigned	not assigned	not assigned	not assigned	not assigned	NOHIT
T303_02005	threonine dehydratase	K01754	E4.3.1.19, ilvA, tdcB	threonine dehydratase [EC:4.3.1.19]	COG1171	E	Amino acid transport and metabolism	PTHR43714:SF1
T303_02010	peptide deformylase	K01462	PDF, def	peptide deformylase [EC:3.5.1.88]	COG0242	J	Translation, ribosomal structure and biogenesis	PTHR10458:SF8
T303_02015	Crp/Fnr family transcriptional regulator	not assigned	not assigned	not assigned	COG0664	T	Signal transduction mechanisms	PTHR24567:SF26
T303_02020	permease of the major facilitator superfamily	not assigned	not assigned	not assigned	COG2271	G	Carbohydrate transport and metabolism	PTHR23517:SF2
T303_02025	30S ribosomal protein S15	K02956	RP-S15, MRPS15, rpsO	small subunit ribosomal protein S15	COG0184	J	Translation, ribosomal structure and biogenesis	PTHR23321:SF26
T303_02030	glycopeptide antibiotics resistance protein	not assigned	not assigned	not assigned	not assigned	not assigned	not assigned	PTHR36834
T303_02035	hypothetical protein	not assigned	not assigned	not assigned	not assigned	not assigned	not assigned	NOHIT
T303_02040	hypothetical protein	not assigned	not assigned	not assigned	not assigned	not assigned	not assigned	NOHIT
T303_02045	hypothetical protein	not assigned	not assigned	not assigned	not assigned	not assigned	not assigned	NOHIT
T303_02050	peptide ABC transporter ATP-binding protein	K17076	K17076, lysY	putative lysine transport system ATP-binding protein [EC:3.6.3.-]	COG1126	E	Amino acid transport and metabolism	PTHR43166:SF20
T303_02055	glutamine ABC transporter substrate-binding protein	K17073	lysX1	putative lysine transport system substrate-binding protein	COG0765	E	Amino acid transport and metabolism	PTHR30614:SF20
T303_02060	UDP pyrophosphate phosphatase	K06153	bacA	undecaprenyl-diphosphatase [EC:3.6.1.27]	COG1968	I	Lipid transport and metabolism	PTHR30622:SF3
T303_02065	adapter protein mecA	K16511	mecA1_2	adapter protein MecA 1/2	COG4862	T,N,K	Signal transduction mechanisms	PTHR39161:SF1
T303_02070	UDP-N-acetylglucosamine:UDP-P N-acetylglucosaminyl-1-P transferase	K02851	wecA, tagO, rfe	UDP-GlcNAc:undecaprenyl-phosphate/decaprenyl-phosphate GlcNAc-1-phosphate transferase [EC:2.7.8.33 2.7.8.35]	COG0472	M	Cell wall/membrane/envelope biogenesis	PTHR22926:SF3
T303_02075	iron ABC transporter ATP-binding protein	K09013	sufC	Fe-S cluster assembly ATP-binding protein	COG0396	O	Posttranslational modification, protein turnover, chaperones	PTHR43204:SF1
T303_02080	Fe-S cluster assembly protein SufD	K09015	sufD	Fe-S cluster assembly protein SufD	COG0719	O	Posttranslational modification, protein turnover, chaperones	PTHR43575:SF1
T303_02085	cysteine desulfurase	K11717	sufS	cysteine desulfurase / selenocysteine lyase [EC:2.8.1.7 4.4.1.16]	COG0520	E	Amino acid transport and metabolism	PTHR43586:SF12
T303_02090	Fe-S assembly protein NifU	K04488	iscU, nifU	nitrogen fixation protein NifU and related proteins	COG0822	O	Posttranslational modification, protein turnover, chaperones	PTHR10093:SF8
T303_02095	Fe-S cluster assembly protein SufB	K09014	sufB	Fe-S cluster assembly protein SufB	COG0719	O	Posttranslational modification, protein turnover, chaperones	PTHR30508:SF1
T303_02100	hypothetical protein	not assigned	not assigned	not assigned	not assigned	not assigned	not assigned	NOHIT
T303_02105	membrane protein	K15580	oppA, mppA	oligopeptide transport system substrate-binding protein	not assigned	not assigned	not assigned	PTHR30290:SF10
T303_02110	membrane protein	K15581	oppB	oligopeptide transport system permease protein	not assigned	not assigned	not assigned	PTHR30465:SF93
T303_02115	hypothetical protein	not assigned	not assigned	not assigned	not assigned	not assigned	not assigned	NOHIT
T303_02120	hypothetical protein	K15582	oppC	oligopeptide transport system permease protein	not assigned	not assigned	not assigned	PTHR43386:SF2
T303_02125	peptide ABC transporter permease	K15582	oppC	oligopeptide transport system permease protein	not assigned	not assigned	not assigned	PTHR43386:SF2
T303_02130	peptide ABC transporter ATP-binding protein	K15583	oppD	oligopeptide transport system ATP-binding protein	not assigned	not assigned	not assigned	PTHR24220:SF607
T303_02145	hypothetical protein	not assigned	not assigned	not assigned	not assigned	not assigned	not assigned	NOHIT
T303_02150	heat shock protein Hsp33	K04083	hslO	molecular chaperone Hsp33	COG1281	O	Posttranslational modification, protein turnover, chaperones	PTHR30111:SF1
T303_02155	tRNA-dihydrouridine synthase	not assigned	not assigned	not assigned	COG0042	J	Translation, ribosomal structure and biogenesis	PTHR11082:SF25
T303_02160	peptidase	not assigned	not assigned	not assigned	not assigned	not assigned	not assigned	PTHR23513
T303_02165	MarR family transcriptional regulator	not assigned	not assigned	not assigned	COG1846	K	Transcription	PTHR42742:SF7
T303_02170	zinc ABC transporter ATP-binding protein	K09817	znuC	zinc transport system ATP-binding protein [EC:3.6.3.-]	COG1121	P	Inorganic ion transport and metabolism	PTHR42734:SF4
T303_02175	zinc ABC transporter permease	K09816	znuB	zinc transport system permease protein	COG1108	P	Inorganic ion transport and metabolism	PTHR30477:SF20
T303_02180	malate transporter	K07088	K07088	uncharacterized protein	COG0679	R	General function prediction only	PTHR36838:SF1
T303_02190	metal-dependent hydrolase	K06896	mapP	maltose 6'-phosphate phosphatase [EC:3.1.3.90]	COG3568	R	General function prediction only	PTHR15822:SF13
T303_02195	glucose-6-phosphate isomerase	K01810	GPI, pgi	glucose-6-phosphate isomerase [EC:5.3.1.9]	COG0166	G	Carbohydrate transport and metabolism	PTHR11469:SF1
T303_02200	hypothetical protein	not assigned	not assigned	not assigned	COG0217	K,J	Transcription	PTHR12532
T303_02205	preprotein translocase subunit YajC	K03210	yajC	preprotein translocase subunit YajC	COG1862	U	Intracellular trafficking, secretion, and vesicular transport	PTHR33909:SF1
T303_02210	UDP pyrophosphate synthase	K00806	uppS	undecaprenyl diphosphate synthase [EC:2.5.1.31]	COG0020	I	Lipid transport and metabolism	PTHR10291:SF0
T303_02215	cytidylyltransferase	K00981	E2.7.7.41, CDS1, CDS2, cdsA	phosphatidate cytidylyltransferase [EC:2.7.7.41]	COG0575	I	Lipid transport and metabolism	PTHR46382:SF1
T303_02220	metalloprotease RseP	K11749	rseP	regulator of sigma E protease [EC:3.4.24.-]	COG0750	O,K	Posttranslational modification, protein turnover, chaperones	PTHR42837:SF2
T303_02225	prolyl-tRNA synthetase	K01881	PARS, proS	prolyl-tRNA synthetase [EC:6.1.1.15]	COG0442	J	Translation, ribosomal structure and biogenesis	PTHR42753:SF2
T303_02230	ABC transporter permease	not assigned	not assigned	not assigned	COG2984	R	General function prediction only	PTHR35271:SF1
T303_02235	ABC transporter ATP-binding protein	K05833	ABC.X4.A	putative ABC transport system ATP-binding protein	COG1101	R	General function prediction only	PTHR42788:SF12
T303_02240	molecular chaperone GroES	K04078	groES, HSPE1	chaperonin GroES	COG0234	O	Posttranslational modification, protein turnover, chaperones	PTHR10772:SF24
T303_02245	molecular chaperone GroEL	K04077	groEL, HSPD1	chaperonin GroEL	COG0459	O	Posttranslational modification, protein turnover, chaperones	PTHR45633
T303_02265	hypothetical protein	not assigned	not assigned	not assigned	not assigned	not assigned	not assigned	NOHIT
T303_02270	hypothetical protein	not assigned	not assigned	not assigned	not assigned	not assigned	not assigned	NOHIT
T303_02280	RNA pseudouridylate synthase	K06180	rluD	23S rRNA pseudouridine1911/1915/1917 synthase [EC:5.4.99.23]	COG0564	J	Translation, ribosomal structure and biogenesis	PTHR21600:SF36
T303_02285	penicillin-binding protein 2A	K12555	pbp2A	penicillin-binding protein 2A [EC:2.4.1.129 3.4.16.4]	COG0744	M	Cell wall/membrane/envelope biogenesis	PTHR32282:SF21
T303_02290	preprotein translocase subunit SecE	K03073	secE	preprotein translocase subunit SecE	COG0690	U	Intracellular trafficking, secretion, and vesicular transport	PTHR33910:SF1
T303_02295	transcription antitermination protein NusG	K02601	nusG	transcriptional antiterminator NusG	COG0250	K	Transcription	PTHR30265:SF2
T303_02300	phosphoesterase	not assigned	not assigned	not assigned	not assigned	not assigned	not assigned	PTHR14969:SF40
T303_02310	cytochrome C	not assigned	not assigned	not assigned	COG1349	K,G	Transcription	PTHR30363:SF45
T303_02315	leucyl-tRNA synthase	K01869	LARS, leuS	leucyl-tRNA synthetase [EC:6.1.1.4]	COG0495	J	Translation, ribosomal structure and biogenesis	PTHR43740:SF2
T303_02330	nicotinate phosphoribosyltransferase	K00763	pncB, NAPRT1	nicotinate phosphoribosyltransferase [EC:6.3.4.21]	COG1488	H	Coenzyme transport and metabolism	PTHR11098
T303_02335	NAD synthetase	K01916	nadE	NAD+ synthase [EC:6.3.1.5]	COG0171	H	Coenzyme transport and metabolism	PTHR23090:SF7
T303_02340	membrane protein	not assigned	not assigned	not assigned	COG3152	S	Function unknown	PTHR34980:SF2
T303_02345	aminopeptidase C	K01372	BLMH, pepC	bleomycin hydrolase [EC:3.4.22.40]	COG3579	E	Amino acid transport and metabolism	PTHR10363:SF4
T303_02350	penicillin-binding protein 1A	K05366	mrcA	penicillin-binding protein 1A [EC:2.4.1.129 3.4.16.4]	COG0744	M	Cell wall/membrane/envelope biogenesis	PTHR32282:SF22
T303_02355	Holliday junction resolvase	K03700	recU	recombination protein U	COG3331	R	General function prediction only	NOHIT
T303_02360	hypothetical protein	not assigned	not assigned	not assigned	COG4474	X	Mobilome - prophages, transposons	PTHR38440:SF1
T303_02365	cell division protein GpsB	not assigned	not assigned	not assigned	not assigned	not assigned	not assigned	PTHR35794:SF1
T303_02370	M1 RNA	K01978	rnpB	M1 RNA	not assigned	not assigned	not assigned	NOHIT
T303_02375	RNA methyltransferase	K07444	ypsC	putative N6-adenine-specific DNA methylase [EC:2.1.1.-]	COG0116	J	Translation, ribosomal structure and biogenesis	PTHR47313:SF1
T303_02380	hypothetical protein	K20073	mapZ, locZ	mid-cell-anchored protein Z	not assigned	not assigned	not assigned	NOHIT
T303_02385	RNA helicase	not assigned	not assigned	not assigned	not assigned	not assigned	not assigned	PTHR10799:SF960
T303_02390	hypothetical protein	not assigned	not assigned	not assigned	not assigned	not assigned	not assigned	NOHIT
T303_02395	UDP-N-acetylmuramate--alanine ligase	K01924	murC	UDP-N-acetylmuramate--alanine ligase [EC:6.3.2.8]	COG0773	M	Cell wall/membrane/envelope biogenesis	PTHR43445:SF3
T303_02400	GNAT family acetyltransferase	not assigned	not assigned	not assigned	not assigned	not assigned	not assigned	PTHR10908:SF3
T303_02405	aminodeoxychorismate lyase	K07082	K07082	UPF0755 protein	COG1559	D	Cell cycle control, cell division, chromosome partitioning	PTHR30518:SF2
T303_02410	transcription elongation factor GreA	K03624	greA	transcription elongation factor GreA	COG0782	K	Transcription	PTHR30437:SF4
T303_02415	hypothetical protein	not assigned	not assigned	not assigned	not assigned	not assigned	not assigned	NOHIT
T303_02420	transposase	not assigned	not assigned	not assigned	not assigned	not assigned	not assigned	NOHIT
T303_02430	cytochrome oxidase biogenesis protein OxaA	K03217	yidC, spoIIIJ, OXA1, ccfA	YidC/Oxa1 family membrane protein insertase	COG0706	M	Cell wall/membrane/envelope biogenesis	PTHR12428:SF35
T303_02435	acylphosphatase	K01512	acyP	acylphosphatase [EC:3.6.1.7]	COG1254	C	Energy production and conversion	PTHR47268:SF2
T303_02440	23S rRNA methyltransferase	K03437	spoU	RNA methyltransferase, TrmH family	COG0566	J	Translation, ribosomal structure and biogenesis	PTHR43191:SF4
T303_02450	membrane protein	K06890	K06890	uncharacterized protein	COG0670	R	General function prediction only	PTHR23291:SF50
T303_02455	hypothetical protein	not assigned	not assigned	not assigned	not assigned	not assigned	not assigned	NOHIT
T303_02460	hypothetical protein	not assigned	not assigned	not assigned	not assigned	not assigned	not assigned	NOHIT
T303_02465	diaminopimelate decarboxylase	K01586	lysA	diaminopimelate decarboxylase [EC:4.1.1.20]	COG0019	E	Amino acid transport and metabolism	PTHR43727:SF2
T303_02470	TetR family transcriptional regulator	not assigned	not assigned	not assigned	not assigned	not assigned	not assigned	PTHR43479
T303_02475	hypothetical protein	K09976	K09976	uncharacterized protein	COG3763	S	Function unknown	NOHIT
T303_02480	glutamate racemase	K01776	murI	glutamate racemase [EC:5.1.1.3]	COG0796	M	Cell wall/membrane/envelope biogenesis	PTHR21198:SF2
T303_02485	deoxyribonucleotide triphosphate pyrophosphatase	K02428	rdgB	XTP/dITP diphosphohydrolase [EC:3.6.1.66]	COG0127	F	Nucleotide transport and metabolism	PTHR11067:SF9
T303_02490	metallophosphoesterase	K07095	K07095	uncharacterized protein	COG0622	R	General function prediction only	PTHR11124:SF12
T303_02495	hypothetical protein	not assigned	not assigned	not assigned	not assigned	not assigned	not assigned	PTHR43803:SF3
T303_02500	tyrosine recombinase XerD	not assigned	not assigned	not assigned	COG4974	L	Replication, recombination and repair	PTHR30349:SF41
T303_02505	segregation and condensation protein A	K05896	scpA	segregation and condensation protein A	COG1354	L	Replication, recombination and repair	PTHR33969:SF2
T303_02510	segregation protein A	K06024	scpB	segregation and condensation protein B	COG1386	K	Transcription	PTHR34298:SF2
T303_02515	ribosomal large subunit pseudouridine synthase B	K06178	rluB	23S rRNA pseudouridine2605 synthase [EC:5.4.99.22]	COG1187	J	Translation, ribosomal structure and biogenesis	PTHR21600:SF2
T303_02520	membrane protein	K08998	K08998	uncharacterized protein	COG0759	M	Cell wall/membrane/envelope biogenesis	PTHR33383:SF1
T303_02525	potassium transporter Trk	K03498	trkH, trkG, ktrB	trk system potassium uptake protein	COG0168	P	Inorganic ion transport and metabolism	PTHR32024:SF2
T303_02530	potassium transporter TrkA	K03499	trkA, ktrA	trk system potassium uptake protein	COG0569	P	Inorganic ion transport and metabolism	PTHR43004:SF2
T303_02535	RNA methyltransferase	K03216	trmL, cspR	tRNA (cytidine/uridine-2'-O-)-methyltransferase [EC:2.1.1.207]	COG0219	J	Translation, ribosomal structure and biogenesis	PTHR42971:SF1
T303_02540	riboflavin transporter	not assigned	not assigned	not assigned	COG3601	H	Coenzyme transport and metabolism	PTHR38438:SF1
T303_02545	phosphatase	K19302	bcrC	undecaprenyl-diphosphatase [EC:3.6.1.27]	COG0671	I	Lipid transport and metabolism	PTHR14969:SF13
T303_02550	XRE family transcriptional regulator	K20342	comR	HTH-type transcriptional regulator, regulator for ComX	not assigned	not assigned	not assigned	PTHR46797
T303_02560	membrane protein	not assigned	not assigned	not assigned	COG3152	S	Function unknown	PTHR34980
T303_02570	hypothetical protein	not assigned	not assigned	not assigned	not assigned	not assigned	not assigned	NOHIT
T303_02575	urease accessory protein	K03191	ureI	acid-activated urea channel	not assigned	not assigned	not assigned	NOHIT
T303_02580	urease subunit gamma	K01430	ureA	urease subunit gamma [EC:3.5.1.5]	COG0831	E	Amino acid transport and metabolism	PTHR33569:SF1
T303_02585	urease subunit beta	K01429	ureB	urease subunit beta [EC:3.5.1.5]	COG0832	E	Amino acid transport and metabolism	PTHR33569:SF1
T303_02590	urease subunit alpha	K01428	ureC	urease subunit alpha [EC:3.5.1.5]	COG0804	E	Amino acid transport and metabolism	PTHR43440:SF1
T303_02595	urease accessory protein UreE	K03187	ureE	urease accessory protein	COG2371	O	Posttranslational modification, protein turnover, chaperones	PTHR33620:SF2
T303_02600	urease accessory protein UreF	K03188	ureF	urease accessory protein	COG0830	O	Posttranslational modification, protein turnover, chaperones	PTHR33620:SF1
T303_02605	urease accessory protein UreG	K03189	ureG	urease accessory protein	COG0378	O	Posttranslational modification, protein turnover, chaperones	PTHR31715:SF0
T303_02610	urease accessory protein UreD	K03190	ureD, ureH	urease accessory protein	COG0829	O	Posttranslational modification, protein turnover, chaperones	PTHR33643:SF1
T303_02615	cobalt transporter CbiM	K02007	cbiM	cobalt/nickel transport system permease protein	COG0310	P	Inorganic ion transport and metabolism	PTHR34229:SF1
T303_02620	cobalt ABC transporter permease	K02008	cbiQ	cobalt/nickel transport system permease protein	COG0619	H	Coenzyme transport and metabolism	PTHR34857:SF2
T303_02625	cobalt ABC transporter ATP-binding protein	K02006	cbiO	cobalt/nickel transport system ATP-binding protein	COG1122	P,R	Inorganic ion transport and metabolism	PTHR43553:SF1
T303_02630	amino acid ABC transporter substrate-binding protein	K02030	ABC.PA.S	polar amino acid transport system substrate-binding protein	COG0834	E,T	Amino acid transport and metabolism	PTHR35936:SF16
T303_02635	peptide synthetase	not assigned	not assigned	not assigned	not assigned	not assigned	not assigned	PTHR45527
T303_02640	NUDIX hydrolase	not assigned	not assigned	not assigned	COG0499	H	Coenzyme transport and metabolism	PTHR43222:SF1
T303_02645	macrolide ABC transporter permease	not assigned	not assigned	not assigned	not assigned	not assigned	not assigned	PTHR23513:SF6
T303_02655	amino acid ABC transporter substrate-binding protein	K02030	ABC.PA.S	polar amino acid transport system substrate-binding protein	COG0834	E,T	Amino acid transport and metabolism	PTHR35936:SF16
T303_02660	O-sialoglycoprotein endopeptidase	K02073	metQ	D-methionine transport system substrate-binding protein	COG1464	P	Inorganic ion transport and metabolism	PTHR30429:SF3
T303_02670	methionine ABC transporter ATP-binding protein	K02071	metN	D-methionine transport system ATP-binding protein	COG1135	E	Amino acid transport and metabolism	PTHR43166:SF5
T303_02675	methionine ABC transporter permease	K02072	metI	D-methionine transport system permease protein	COG2011	E	Amino acid transport and metabolism	PTHR30450:SF1
T303_02680	serine/threonine transporter SstT	K07862	sstT	serine/threonine transporter	COG3633	E	Amino acid transport and metabolism	PTHR42865:SF8
T303_02685	DNA-directed RNA polymerase subunit delta	K09134	flA	adenosyl-fluoride synthase [EC:2.5.1.63]	COG1912	H	Coenzyme transport and metabolism	PTHR35092:SF1
T303_02690	membrane protein	K16924	mtsT	energy-coupling factor transport system substrate-specific component	COG4720	S	Function unknown	PTHR37815:SF3
T303_02695	heme ABC transporter ATP-binding protein	K16786	ecfA1	energy-coupling factor transport system ATP-binding protein [EC:3.6.3.-]	COG1123	O	Posttranslational modification, protein turnover, chaperones	PTHR43553:SF1
T303_02700	cobalt ABC transporter permease	K16785	ecfT	energy-coupling factor transport system permease protein	COG0619	H	Coenzyme transport and metabolism	PTHR33514:SF1
T303_02705	transketolase	K00615	E2.2.1.1, tktA, tktB	transketolase [EC:2.2.1.1]	COG0021	G	Carbohydrate transport and metabolism	PTHR43522:SF2
T303_02710	potassium transporter Trk	K03499	trkA, ktrA	trk system potassium uptake protein	COG0569	P	Inorganic ion transport and metabolism	PTHR43833:SF7
T303_02715	V-type Na+ -ATPase subunit J	not assigned	not assigned	not assigned	COG0168	P	Inorganic ion transport and metabolism	PTHR32024:SF1
T303_02720	16S rRNA methyltransferase	K03501	gidB, rsmG	16S rRNA (guanine527-N7)-methyltransferase [EC:2.1.1.170]	COG0357	J	Translation, ribosomal structure and biogenesis	PTHR31760:SF0
T303_02725	DNA-binding protein	K07040	K07040	uncharacterized protein	COG1399	S	Function unknown	PTHR34374:SF1
T303_02730	PhoB family transcriptional regulator	not assigned	not assigned	not assigned	COG0745	T,K	Signal transduction mechanisms	PTHR26402:SF736
T303_02735	sensor histidine kinase	not assigned	not assigned	not assigned	COG0642	T	Signal transduction mechanisms	PTHR45528
T303_02740	NrdR family transcriptional regulator	K07738	nrdR	transcriptional repressor NrdR	COG1327	K	Transcription	PTHR30455:SF2
T303_02745	chromosome replication initiation / membrane attachment protein DnaB	K03346	dnaB	replication initiation and membrane attachment protein	COG3611	L	Replication, recombination and repair	NOHIT
T303_02750	primosomal protein DnaI	K11144	dnaI	primosomal protein DnaI	COG1484	L	Replication, recombination and repair	PTHR30050:SF8
T303_02755	GTP-binding protein Der	K03977	engA, der	GTPase	COG1160	R	General function prediction only	PTHR43834:SF2
T303_02785	seryl-tRNA synthase	K01875	SARS, serS	seryl-tRNA synthetase [EC:6.1.1.11]	COG0172	J	Translation, ribosomal structure and biogenesis	PTHR43697:SF1
T303_02790	mannose operon ManO protein	not assigned	not assigned	not assigned	COG4687	S	Function unknown	NOHIT
T303_02795	PTS mannose transporter subunit IID	K02796	PTS-Man-EIID, manZ	PTS system, mannose-specific IID component	COG3716	G	Carbohydrate transport and metabolism	PTHR32502:SF5
T303_02800	PTS mannose transporter subunit IIC	K02795	PTS-Man-EIIC, manY	PTS system, mannose-specific IIC component	COG3715	G	Carbohydrate transport and metabolism	PTHR32502:SF25
T303_02805	PTS mannose transporter subunit IIAB	K02793	PTS-Man-EIIA, manX	PTS system, mannose-specific IIA component [EC:2.7.1.191]	COG3444	G	Carbohydrate transport and metabolism	PTHR33799:SF8
T303_02810	cyclase	not assigned	not assigned	not assigned	COG1878	E	Amino acid transport and metabolism	PTHR43564:SF2
T303_02815	HAD hydrolase	K21064	ycsE, yitU, ywtE	5-amino-6-(5-phospho-D-ribitylamino)uracil phosphatase[EC:3.1.3.104]	COG0561	R,H	General function prediction only	PTHR10000:SF23
T303_02820	guanine permease	K06901	pbuG	putative MFS transporter, AGZA family, xanthine/uracil permease	COG2252	F	Nucleotide transport and metabolism	PTHR43337:SF1
T303_02825	hydrolase	K06925	tsaE	tRNA threonylcarbamoyladenosine biosynthesis protein TsaE	COG0802	J	Translation, ribosomal structure and biogenesis	PTHR33540:SF2
T303_02830	GNAT family acetyltransferase	not assigned	not assigned	not assigned	not assigned	not assigned	not assigned	PTHR43617:SF13
T303_02835	transcriptional regulator	not assigned	not assigned	not assigned	COG1316	M	Cell wall/membrane/envelope biogenesis	PTHR33392
T303_02840	ribosome maturation protein RimP	K09748	rimP	ribosome maturation factor RimP	COG0779	J	Translation, ribosomal structure and biogenesis	PTHR33867:SF1
T303_02845	transcription elongation factor NusA	K02600	nusA	N utilization substance protein A	COG0195	K	Transcription	PTHR22648:SF0
T303_02850	hypothetical protein	K07742	ylxR	uncharacterized protein	COG2740	R	General function prediction only	PTHR34215:SF1
T303_02855	hypothetical protein	not assigned	not assigned	not assigned	COG1358	J	Translation, ribosomal structure and biogenesis	PTHR11449:SF5
T303_02860	translation initiation factor IF-2	K02519	infB, MTIF2	translation initiation factor IF-2	COG0532	J	Translation, ribosomal structure and biogenesis	PTHR43381:SF5
T303_02865	ribosome-binding factor A	K02834	rbfA	ribosome-binding factor A	COG0858	J	Translation, ribosomal structure and biogenesis	PTHR33515:SF1
T303_02880	UDP-N-acetylmuramoylalanyl-D-glutamate--2, 6-diaminopimelate ligase	K05362	murE	UDP-N-acetylmuramoyl-L-alanyl-D-glutamate-L-lysine ligase [EC:6.3.2.7]	COG0769	M	Cell wall/membrane/envelope biogenesis	PTHR23135:SF4
T303_02885	polysaccharide transporter	not assigned	not assigned	not assigned	COG2244	M	Cell wall/membrane/envelope biogenesis	PTHR30250:SF6
T303_02890	hydrolase	not assigned	not assigned	not assigned	not assigned	not assigned	not assigned	PTHR43294
T303_02895	cystathionine gamma-synthase	K01739	metB	cystathionine gamma-synthase [EC:2.5.1.48]	COG0626	E	Amino acid transport and metabolism	PTHR11808:SF61
T303_02900	cysteine desulfhydrase	K14155	patB, malY	cysteine-S-conjugate beta-lyase [EC:4.4.1.13]	COG1168	E,R	Amino acid transport and metabolism	PTHR43525
T303_02905	hypothetical protein	not assigned	not assigned	not assigned	not assigned	not assigned	not assigned	NOHIT
T303_02910	uracil phosphoribosyltransferase	K00761	upp, UPRT	uracil phosphoribosyltransferase [EC:2.4.2.9]	COG0035	F	Nucleotide transport and metabolism	PTHR10285:SF46
T303_02915	ATP-dependent Clp protease proteolytic subunit	K01358	clpP, CLPP	ATP-dependent Clp protease, protease subunit [EC:3.4.21.92]	COG0740	O	Posttranslational modification, protein turnover, chaperones	PTHR10381:SF11
T303_02920	hypothetical protein	not assigned	not assigned	not assigned	COG3679	T	Signal transduction mechanisms	PTHR38448:SF2
T303_02925	hypothetical protein	not assigned	not assigned	not assigned	COG4471	S	Function unknown	NOHIT
T303_02930	branched-chain amino acid ABC transporter substrate-binding protein	K01999	livK	branched-chain amino acid transport system substrate-binding protein	COG0683	E	Amino acid transport and metabolism	PTHR30483:SF6
T303_02935	ABC transporter permease	K01997	livH	branched-chain amino acid transport system permease protein	COG0559	E	Amino acid transport and metabolism	PTHR11795:SF371
T303_02940	branched-chain amino acid ABC transporter permease	K01998	livM	branched-chain amino acid transport system permease protein	COG4177	E	Amino acid transport and metabolism	PTHR30482:SF10
T303_02945	branched-chain amino acid ABC transporter ATP-binding protein	K01995	livG	branched-chain amino acid transport system ATP-binding protein	COG0411	E	Amino acid transport and metabolism	PTHR45772:SF7
T303_02950	amino acid ABC transporter ATPase	K01996	livF	branched-chain amino acid transport system ATP-binding protein	COG0410	E	Amino acid transport and metabolism	PTHR43820:SF4
T303_02960	cysteine synthase	K01738	cysK	cysteine synthase [EC:2.5.1.47]	COG0031	E	Amino acid transport and metabolism	PTHR10314:SF164
T303_02965	Xaa-Pro dipeptidase	not assigned	not assigned	not assigned	COG1739	R	General function prediction only	PTHR16301:SF0
T303_02970	competence protein	K02240	comFA	competence protein ComFA	COG4098	L	Replication, recombination and repair	PTHR30580:SF1
T303_02975	competence protein	K02242	comFC	competence protein ComFC	COG1040	R	General function prediction only	PTHR47505:SF1
T303_02985	16S ribosomal RNA	K01977	16SrRNA, rrs	16S ribosomal RNA	not assigned	not assigned	not assigned	NOHIT
T303_02990	tRNA Ala	K14218	tRNA-Ala	tRNA Ala	not assigned	not assigned	not assigned	NOHIT
T303_02995	23S ribosomal RNA	K01980	23SrRNA, rrl	23S ribosomal RNA	not assigned	not assigned	not assigned	NOHIT
T303_03000	5S ribosomal RNA	K01985	5SrRNA, rrf	5S ribosomal RNA	not assigned	not assigned	not assigned	NOHIT
T303_03005	tRNA Asn	K14220	tRNA-Asn	tRNA Asn	not assigned	not assigned	not assigned	NOHIT
T303_03010	tRNA Leu	K14228	tRNA-Leu	tRNA Leu	not assigned	not assigned	not assigned	NOHIT
T303_03015	tRNA Thr	K14234	tRNA-Thr	tRNA Thr	not assigned	not assigned	not assigned	NOHIT
T303_03020	tRNA Glu	K14224	tRNA-Glu	tRNA Glu	not assigned	not assigned	not assigned	NOHIT
T303_03025	inorganic diphosphatase PpaC	K15986	ppaC	manganese-dependent inorganic pyrophosphatase [EC:3.6.1.1]	COG1227	C,P	Energy production and conversion	PTHR12112:SF40
T303_03030	hypothetical protein	not assigned	not assigned	not assigned	not assigned	not assigned	not assigned	PTHR30136:SF7
T303_03035	hypothetical protein	K07586	ygaC	uncharacterized protein	COG3557	S	Function unknown	PTHR39159:SF1
T303_03040	recombinase RecX	K03565	recX	regulatory protein	COG2137	O	Posttranslational modification, protein turnover, chaperones	PTHR33602:SF1
T303_03045	RNA methyltransferase	not assigned	not assigned	not assigned	COG2265	J	Translation, ribosomal structure and biogenesis	PTHR11061:SF45
T303_03050	aspartate--ammonia ligase	K01914	asnA	aspartate--ammonia ligase [EC:6.3.1.1]	COG2502	E	Amino acid transport and metabolism	PTHR30073:SF5
T303_03055	aspartate kinase	K00928	lysC	aspartate kinase [EC:2.7.2.4]	COG0527	E	Amino acid transport and metabolism	PTHR21499:SF49
T303_03060	HAD family hydrolase	not assigned	not assigned	not assigned	COG0637	R,G	General function prediction only	PTHR46193
T303_03065	enoyl-CoA hydratase	K18474	fabM	trans-2-decenoyl-[acyl-carrier protein] isomerase [EC:5.3.3.14]	COG1024	I	Lipid transport and metabolism	PTHR11941:SF76
T303_03070	MarR family transcriptional regulator	not assigned	not assigned	not assigned	COG1846	K	Transcription	PTHR33164:SF52
T303_03075	3-oxoacyl-ACP synthase	K00648	fabH	3-oxoacyl-[acyl-carrier-protein] synthase III [EC:2.3.1.180]	COG0332	I	Lipid transport and metabolism	PTHR43091
T303_03080	acyl carrier protein	K02078	acpP	acyl carrier protein	COG0236	I,Q	Lipid transport and metabolism	PTHR20863:SF28
T303_03085	2-nitropropane dioxygenase	K02371	fabK	enoyl-[acyl-carrier protein] reductase II [EC:1.3.1.9]	COG2070	R	General function prediction only	PTHR32332:SF20
T303_03090	ACP S-malonyltransferase	K00645	fabD	[acyl-carrier-protein] S-malonyltransferase [EC:2.3.1.39]	COG0331	I	Lipid transport and metabolism	PTHR42681:SF1
T303_03095	3-ketoacyl-ACP reductase	K00059	fabG	3-oxoacyl-[acyl-carrier protein] reductase [EC:1.1.1.100]	COG1028	I,R,Q	Lipid transport and metabolism	PTHR42879:SF2
T303_03100	3-oxoacyl-ACP synthase	K09458	fabF	3-oxoacyl-[acyl-carrier-protein] synthase II [EC:2.3.1.179]	COG0304	I,Q	Lipid transport and metabolism	PTHR11712:SF297
T303_03105	acetyl-CoA carboxylase biotin carboxyl carrier protein subunit	K02160	accB, bccP	acetyl-CoA carboxylase biotin carboxyl carrier protein	COG0511	I,H	Lipid transport and metabolism	PTHR43416:SF4
T303_03110	3-hydroxyacyl-ACP dehydratase	K02372	fabZ	3-hydroxyacyl-[acyl-carrier-protein] dehydratase [EC:4.2.1.59]	COG0764	I	Lipid transport and metabolism	PTHR30272:SF1
T303_03115	acetyl-CoA carboxylase biotin carboxylase subunit	K01961	accC	acetyl-CoA carboxylase, biotin carboxylase subunit [EC:6.4.1.2 6.3.4.14]	COG0439	I	Lipid transport and metabolism	PTHR42761:SF2
T303_03120	acetyl-CoA carboxylase subunit beta	K01963	accD	acetyl-CoA carboxylase carboxyl transferase subunit beta [EC:6.4.1.2 2.1.3.15]	COG0777	I	Lipid transport and metabolism	PTHR42995:SF2
T303_03125	acetyl-CoA carboxylase subunit alpha	K01962	accA	acetyl-CoA carboxylase carboxyl transferase subunit alpha [EC:6.4.1.2 2.1.3.15]	COG0825	I	Lipid transport and metabolism	PTHR42853
T303_03130	S-ribosylhomocysteinase	K07173	luxS	S-ribosylhomocysteine lyase [EC:4.4.1.21]	COG1854	T	Signal transduction mechanisms	PTHR35799:SF1
T303_03140	ribonuclease	K18682	rny	ribonucrease Y [EC:3.1.-.-]	COG1418	J,R	Translation, ribosomal structure and biogenesis	PTHR12826:SF15
T303_03150	DeoR family transcriptional regulator	K03436	fruR2, fruR	DeoR family transcriptional regulator, fructose operon transcriptional repressor	COG1349	K,G	Transcription	PTHR30363:SF4
T303_03155	6-phosphofructokinase	K00882	fruK	1-phosphofructokinase [EC:2.7.1.56]	COG1105	G	Carbohydrate transport and metabolism	PTHR46566:SF1
T303_03165	glutathione reductase	K00383	GSR, gor	glutathione reductase (NADPH) [EC:1.8.1.7]	COG1249	C	Energy production and conversion	PTHR42737:SF2
T303_03170	folylpolyglutamate synthase	K11754	folC	dihydrofolate synthase / folylpolyglutamate synthase [EC:6.3.2.12 6.3.2.17]	COG0285	H	Coenzyme transport and metabolism	PTHR11136:SF0
T303_03175	hypothetical protein	not assigned	not assigned	not assigned	not assigned	not assigned	not assigned	PTHR11003:SF18
T303_03180	aminotransferase V	K04487	iscS, NFS1	cysteine desulfurase [EC:2.8.1.7]	COG1104	E	Amino acid transport and metabolism	PTHR11601:SF50
T303_03185	thiamine biosynthesis protein ThiI	K03151	thiI	tRNA uracil 4-sulfurtransferase [EC:2.8.1.4]	COG0301	H,J	Coenzyme transport and metabolism	PTHR43209:SF1
T303_03190	glycosyl transferase family 4	not assigned	not assigned	not assigned	COG0438	M	Cell wall/membrane/envelope biogenesis	PTHR12526
T303_03195	accessory Sec system glycosyltransferase GtfB	not assigned	not assigned	not assigned	not assigned	not assigned	not assigned	NOHIT
T303_03200	hypothetical protein	not assigned	not assigned	not assigned	not assigned	not assigned	not assigned	NOHIT
T303_03205	50S ribosomal protein L21	K02888	RP-L21, MRPL21, rplU	large subunit ribosomal protein L21	COG0261	J	Translation, ribosomal structure and biogenesis	PTHR21349
T303_03210	50S ribosomal protein L27	K02899	RP-L27, MRPL27, rpmA	large subunit ribosomal protein L27	COG0211	J	Translation, ribosomal structure and biogenesis	PTHR15893
T303_03215	acetyltransferase	not assigned	not assigned	not assigned	COG1670	J,O	Translation, ribosomal structure and biogenesis	PTHR43441:SF2
T303_03220	transposase	not assigned	not assigned	not assigned	COG4835	S	Function unknown	NOHIT
T303_03230	dihydrodipicolinate reductase	K00215	dapB	4-hydroxy-tetrahydrodipicolinate reductase [EC:1.17.1.8]	COG0289	E	Amino acid transport and metabolism	PTHR20836:SF0
T303_03235	CCA-adding protein	K00974	cca	tRNA nucleotidyltransferase (CCA-adding enzyme) [EC:2.7.7.72 3.1.3.-3.1.4.-]	COG0617	J	Translation, ribosomal structure and biogenesis	PTHR46173:SF1
T303_03240	antibiotic ABC transporter ATP-binding protein	K15738	uup	ABC transport system ATP-binding/permease protein	COG0488	R	General function prediction only	PTHR42855:SF1
T303_03245	hypothetical protein	not assigned	not assigned	not assigned	COG3247	S	Function unknown	PTHR34989:SF1
T303_03250	DNA mismatch repair protein MutT	not assigned	not assigned	not assigned	COG1051	F	Nucleotide transport and metabolism	PTHR43736:SF1
T303_03255	transcriptional regulator	not assigned	not assigned	not assigned	COG3172	H	Coenzyme transport and metabolism	PTHR37512:SF1
T303_03260	glutamate dehydrogenase	K00262	E1.4.1.4, gdhA	glutamate dehydrogenase (NADP+) [EC:1.4.1.4]	COG0334	E	Amino acid transport and metabolism	PTHR43571:SF1
T303_03265	peptide deformylase	K01462	PDF, def	peptide deformylase [EC:3.5.1.88]	COG0242	J	Translation, ribosomal structure and biogenesis	PTHR10458:SF14
T303_03270	MarR family transcriptional regulator	not assigned	not assigned	not assigned	COG1846	K	Transcription	PTHR33164:SF50
T303_03275	ABC transporter	K06147	ABCB-BAC	ATP-binding cassette, subfamily B, bacterial	COG1132	V	Defense mechanisms	PTHR24221:SF276
T303_03280	ABC transporter	K06147	ABCB-BAC	ATP-binding cassette, subfamily B, bacterial	COG1132	V	Defense mechanisms	PTHR24222
T303_03295	uridylate kinase	K09903	pyrH	uridylate kinase [EC:2.7.4.22]	COG0528	F	Nucleotide transport and metabolism	PTHR42833
T303_03300	ribosome recycling factor	K02838	frr, MRRF, RRF	ribosome recycling factor	COG0233	J	Translation, ribosomal structure and biogenesis	PTHR20982:SF8
T303_03305	S1 RNA-binding protein	K00243	K00243	uncharacterized protein	COG2996	R	General function prediction only	PTHR37296:SF1
T303_03310	hypothetical protein	not assigned	not assigned	not assigned	COG4479	S	Function unknown	NOHIT
T303_03315	peptigoglycan-binding protein LysM	not assigned	not assigned	not assigned	COG3942	M	Cell wall/membrane/envelope biogenesis	NOHIT
T303_03320	hypothetical protein	not assigned	not assigned	not assigned	not assigned	not assigned	not assigned	PTHR17384:SF7
T303_03325	phosphate starvation-inducible protein PhoH	K06217	phoH, phoL	phosphate starvation-inducible protein PhoH and related proteins	COG1702	T	Signal transduction mechanisms	PTHR30473:SF1
T303_03330	hypothetical protein	not assigned	not assigned	not assigned	not assigned	not assigned	not assigned	NOHIT
T303_03335	hypothetical protein	not assigned	not assigned	not assigned	not assigned	not assigned	not assigned	NOHIT
T303_03340	hypothetical protein	not assigned	not assigned	not assigned	not assigned	not assigned	not assigned	NOHIT
T303_03345	hypothetical protein	not assigned	not assigned	not assigned	not assigned	not assigned	not assigned	NOHIT
T303_03350	methionyl-tRNA synthetase	K01874	MARS, metG	methionyl-tRNA synthetase [EC:6.1.1.10]	COG0143	J	Translation, ribosomal structure and biogenesis	PTHR43326:SF1
T303_03355	LysR family transcriptional regulator	not assigned	not assigned	not assigned	COG0583	K	Transcription	PTHR30346:SF0
T303_03360	hypothetical protein	not assigned	not assigned	not assigned	not assigned	not assigned	not assigned	NOHIT
T303_03365	competence protein CoiA	K06198	coiA	competence protein CoiA	COG4469	R	General function prediction only	NOHIT
T303_03370	oligopeptidase PepB	K08602	pepF, pepB	oligoendopeptidase F [EC:3.4.24.-]	COG1164	E	Amino acid transport and metabolism	PTHR11804:SF70
T303_03375	hypothetical protein	not assigned	not assigned	not assigned	not assigned	not assigned	not assigned	NOHIT
T303_03380	O-methyltransferase	not assigned	not assigned	not assigned	COG4122	R	General function prediction only	PTHR10509:SF14
T303_03385	protease maturation protein	K07533	prsA	foldase protein PrsA [EC:5.2.1.8]	not assigned	not assigned	not assigned	PTHR47245:SF1
T303_03390	alanyl-tRNA synthase	K01872	AARS, alaS	alanyl-tRNA synthetase [EC:6.1.1.7]	COG0013	J	Translation, ribosomal structure and biogenesis	PTHR11777:SF9
T303_03395	hypothetical protein	not assigned	not assigned	not assigned	not assigned	not assigned	not assigned	PTHR13246:SF2
T303_03405	hypothetical protein	not assigned	not assigned	not assigned	not assigned	not assigned	not assigned	PTHR24023:SF929
T303_03410	cell wall protein	not assigned	not assigned	not assigned	not assigned	not assigned	not assigned	NOHIT
T303_03415	hydrolase	not assigned	not assigned	not assigned	COG0388	R	General function prediction only	PTHR23088:SF30
T303_03420	diaminopimelate aminotransferase	K08969	mtnE, mtnV	ami notransferase [EC:2.6.1.-]	COG0436	E	Amino acid transport and metabolism	PTHR42832:SF3
T303_03425	N-acetyl-gamma-glutamyl-phosphate reductase	K00145	argC	N-acetyl-gamma-glutamyl-phosphate reductase [EC:1.2.1.38]	COG0002	E	Amino acid transport and metabolism	PTHR32338:SF8
T303_03430	N-acetylglutamate synthase	K00620	argJ	glutamate N-acetyltransferase / amino-acid N-acetyltransferase [EC:2.3.1.35 2.3.1.1]	COG1364	E	Amino acid transport and metabolism	PTHR23100
T303_03435	acetylglutamate kinase	K00930	argB	acetylglutamate kinase [EC:2.7.2.8]	COG0548	E	Amino acid transport and metabolism	PTHR23342:SF0
T303_03440	acetylornithine aminotransferase	K00821	argD	acetylornithine/N-succinyldiaminopimelate ami notransferase [EC:2.6.1.11 2.6.1.17]	COG4992	E	Amino acid transport and metabolism	PTHR11986:SF79
T303_03445	polysaccharide deacetylase	not assigned	not assigned	not assigned	not assigned	not assigned	not assigned	PTHR34216:SF3
T303_03450	homoserine dehydrogenase	K00003	hom	homoserine dehydrogenase [EC:1.1.1.3]	COG0460	E	Amino acid transport and metabolism	PTHR43331:SF1
T303_03455	homoserine kinase	K00872	thrB1	homoserine kinase [EC:2.7.1.39]	COG0083	E	Amino acid transport and metabolism	PTHR20861:SF1
T303_03460	chloramphenicol-sensitivity protein (RarD) family protein	K05786	rarD	chloramphenicol-sensitive protein RarD	COG2962	S	Function unknown	PTHR22911:SF41
T303_03465	hypothetical protein	not assigned	not assigned	not assigned	not assigned	not assigned	not assigned	NOHIT
T303_03470	hypothetical protein	not assigned	not assigned	not assigned	not assigned	not assigned	not assigned	NOHIT
T303_03485	valyl-tRNA synthetase	K01873	VARS, valS	valyl-tRNA synthetase [EC:6.1.1.9]	COG0525	J	Translation, ribosomal structure and biogenesis	PTHR11946
T303_03490	hypothetical protein	not assigned	not assigned	not assigned	not assigned	not assigned	not assigned	NOHIT
T303_03495	F0F1 ATP synthase subunit C	K02110	ATPF0C, atpE	F-type H+-transporting ATPase subunit c	COG0636	C	Energy production and conversion	PTHR10031:SF0
T303_03500	F0F1 ATP synthase subunit A	K02108	ATPF0A, atpB	F-type H+-transporting ATPase subunit a	COG0356	C	Energy production and conversion	PTHR42823:SF1
T303_03505	F0F1 ATP synthase subunit B	K02109	ATPF0B, atpF	F-type H+-transporting ATPase subunit b	COG0711	C	Energy production and conversion	PTHR33445:SF1
T303_03510	F0F1 ATP synthase subunit delta	K02113	ATPF1D, atpH	F-type H+-transporting ATPase subunit delta	COG0712	C	Energy production and conversion	PTHR11910
T303_03515	F0F1 ATP synthase subunit alpha	K02111	ATPF1A, atpA	F-type H+-transporting ATPase subunit alpha [EC:7.1.2.2]	COG0056	C	Energy production and conversion	PTHR42875:SF3
T303_03520	F0F1 ATP synthase subunit gamma	K02115	ATPF1G, atpG	F-type H+-transporting ATPase subunit gamma	COG0224	C	Energy production and conversion	PTHR11693
T303_03525	F0F1 ATP synthase subunit beta	K02112	ATPF1B, atpD	F-type H+-transporting ATPase subunit beta [EC:7.1.2.2]	COG0055	C	Energy production and conversion	PTHR15184:SF8
T303_03530	F0F1 ATP synthase subunit epsilon	K02114	ATPF1E, atpC	F-type H+-transporting ATPase subunit epsilon	COG0355	C	Energy production and conversion	PTHR13822:SF10
T303_03535	cell division protein	K03588	ftsW, spoVE	cell division protein FtsW	COG0772	D	Cell cycle control, cell division, chromosome partitioning	PTHR30474:SF10
T303_03540	elongation factor Tu	K02358	tuf, TUFM	elongation factor Tu	COG0050	J	Translation, ribosomal structure and biogenesis	PTHR43721:SF17
T303_03545	triosephosphate isomerase	K01803	TPI, tpiA	triosephosphate isomerase (TIM) [EC:5.3.1.1]	COG0149	G	Carbohydrate transport and metabolism	PTHR21139:SF2
T303_03550	thymidylate kinase	K00943	tmk, DTYMK	dTMP kinase [EC:2.7.4.9]	COG0125	F	Nucleotide transport and metabolism	PTHR10344:SF4
T303_03555	DNA polymerase III subunit delta'	K02341	holB	DNA polymerase III subunit delta' [EC:2.7.7.7]	not assigned	not assigned	not assigned	PTHR11669:SF8
T303_03560	signal peptidase II	not assigned	not assigned	not assigned	COG1774	T	Signal transduction mechanisms	PTHR43830:SF3
T303_03565	DNA replication initiation control protein YabA	not assigned	not assigned	not assigned	COG4467	L	Replication, recombination and repair	NOHIT
T303_03570	16S rRNA methyltransferase	K07056	rsmI	16S rRNA (cytidine1402-2'-O)-methyltransferase [EC:2.1.1.198]	COG0313	J	Translation, ribosomal structure and biogenesis	PTHR46111:SF1
T303_03575	ammonia permease	K03320	amt, AMT, MEP	ammonium transporter, Amt family	COG0004	P	Inorganic ion transport and metabolism	PTHR43029:SF10
T303_03580	nitrogen regulatory protein P-II	K04751	glnB	nitrogen regulatory protein P-II 1	COG0347	T,E	Signal transduction mechanisms	PTHR30115:SF19
T303_03585	peptidoglycan hydrolase	not assigned	not assigned	not assigned	COG1705	N,M	Cell motility	PTHR33308:SF8
T303_03590	haloacid dehalogenase	not assigned	not assigned	not assigned	COG0561	R,H	General function prediction only	PTHR10000:SF8
T303_03600	hypothetical protein	not assigned	not assigned	not assigned	not assigned	not assigned	not assigned	NOHIT
T303_03605	phosphate transporter	not assigned	not assigned	not assigned	not assigned	not assigned	not assigned	PTHR10010:SF26
T303_03610	N-acetylglucosamine-6-phosphate deacetylase	K01443	nagA, AMDHD2	N-acetylglucosamine-6-phosphate deacetylase [EC:3.5.1.25]	COG1820	G	Carbohydrate transport and metabolism	PTHR11113:SF1
T303_03615	hypothetical protein	not assigned	not assigned	not assigned	not assigned	not assigned	not assigned	PTHR37814:SF1
T303_03620	hypothetical protein	not assigned	not assigned	not assigned	not assigned	not assigned	not assigned	PTHR37814:SF1
T303_03630	glycyl-tRNA synthase subunit alpha	K01878	glyQ	glycyl-tRNA synthetase alpha chain [EC:6.1.1.14]	COG0752	J	Translation, ribosomal structure and biogenesis	NOHIT
T303_03635	glycyl-tRNA synthase subunit beta	K01879	glyS	glycyl-tRNA synthetase beta chain [EC:6.1.1.14]	COG0751	J	Translation, ribosomal structure and biogenesis	PTHR30075:SF2
T303_03640	hypothetical protein	not assigned	not assigned	not assigned	COG4224	S	Function unknown	PTHR37300:SF1
T303_03645	amino acid transporter	K03293	TC.AAT	amino acid transporter, AAT family	COG1113	E	Amino acid transport and metabolism	PTHR43495:SF2
T303_03650	nucleotidyltransferase	not assigned	not assigned	not assigned	not assigned	not assigned	not assigned	NOHIT
T303_03660	peptidyl-prolyl cis-trans isomerase	K03767	PPIA	peptidyl-prolyl cis-trans isomerase A (cyclophilin A) [EC:5.2.1.8]	COG0652	O	Posttranslational modification, protein turnover, chaperones	PTHR45625:SF5
T303_03665	transposase IS3	not assigned	not assigned	not assigned	COG2801	X	Mobilome - prophages, transposons	PTHR42648:SF3
T303_03670	transposase IS3	not assigned	not assigned	not assigned	COG2963	X	Mobilome - prophages, transposons	PTHR33795:SF1
T303_03675	hypothetical protein	not assigned	not assigned	not assigned	not assigned	not assigned	not assigned	NOHIT
T303_03680	membrane protein	not assigned	not assigned	not assigned	not assigned	not assigned	not assigned	PTHR19282:SF159
T303_03685	hypothetical protein	not assigned	not assigned	not assigned	not assigned	not assigned	not assigned	NOHIT
T303_03690	hypothetical protein	not assigned	not assigned	not assigned	not assigned	not assigned	not assigned	NOHIT
T303_03695	LysR family transcriptional regulator	not assigned	not assigned	not assigned	COG0583	K	Transcription	PTHR30346:SF0
T303_03700	signal peptidase II	K03101	lspA	signal peptidase II [EC:3.4.23.36]	COG0597	U,M	Intracellular trafficking, secretion, and vesicular transport	PTHR33695:SF1
T303_03705	RNA pseudouridine synthase	K06180	rluD	23S rRNA pseudouridine1911/1915/1917 synthase [EC:5.4.99.23]	COG0564	J	Translation, ribosomal structure and biogenesis	PTHR21600:SF38
T303_03710	phosphoribosyl transferase	K02825	pyrR	pyrimidine operon attenuation protein / uracil phosphoribosyltransferase [EC:2.4.2.9]	COG2065	F	Nucleotide transport and metabolism	PTHR11608:SF0
T303_03715	uracil transporter	K02824	pyrP, uraA	uracil permease	COG2233	F	Nucleotide transport and metabolism	PTHR11119:SF49
T303_03720	aspartate carbamoyltransferase catalytic subunit	K00609	pyrB, PYR2	aspartate carbamoyltransferase catalytic subunit [EC:2.1.3.2]	COG0540	F	Nucleotide transport and metabolism	PTHR11405:SF16
T303_03725	carbamoyl phosphate synthase small subunit	K01956	carA, CPA1	carbamoyl-phosphate synthase small subunit [EC:6.3.5.5]	COG0505	E,F	Amino acid transport and metabolism	PTHR11405:SF4
T303_03730	carbamoyl phosphate synthase large subunit	K01955	carB, CPA2	carbamoyl-phosphate synthase large subunit [EC:6.3.5.5]	COG0458	E,F	Amino acid transport and metabolism	PTHR11405:SF50
T303_03735	transposase IS1193	not assigned	not assigned	not assigned	COG3464	X	Mobilome - prophages, transposons	PTHR33498:SF1
T303_03740	SAM-dependent methyltransferase	not assigned	not assigned	not assigned	not assigned	not assigned	not assigned	PTHR36112:SF1
T303_03745	hypothetical protein	not assigned	not assigned	not assigned	not assigned	not assigned	not assigned	NOHIT
T303_03750	hypothetical protein	K02005	ABC.CD.TX	HlyD family secretion protein	not assigned	not assigned	not assigned	PTHR32347:SF14
T303_03755	ABC transporter substrate-binding protein	not assigned	not assigned	not assigned	not assigned	not assigned	not assigned	PTHR30469
T303_03765	hypothetical protein	not assigned	not assigned	not assigned	not assigned	not assigned	not assigned	PTHR30572:SF4
T303_03770	macrolide ABC transporter	K02004	ABC.CD.P	putative ABC transport system permease protein	not assigned	not assigned	not assigned	PTHR30572:SF4
T303_03775	membrane protein	K02004	ABC.CD.P	putative ABC transport system permease protein	not assigned	not assigned	not assigned	PTHR30572:SF4
T303_03780	50S ribosomal protein L10	K02864	RP-L10, MRPL10, rplJ	large subunit ribosomal protein L10	COG0244	J	Translation, ribosomal structure and biogenesis	PTHR11560
T303_03785	50S ribosomal protein L7/L12	K02935	RP-L7, MRPL12, rplL	large subunit ribosomal protein L7/L12	COG0222	J	Translation, ribosomal structure and biogenesis	PTHR45987:SF4
T303_03795	peptide ABC transporter ATP-binding protein	K02003	ABC.CD.A	putative ABC transport system ATP-binding protein	COG1136	M	Cell wall/membrane/envelope biogenesis	PTHR24220:SF636
T303_03800	ABC transporter permease	K02004	ABC.CD.P	putative ABC transport system permease protein	not assigned	not assigned	not assigned	PTHR43738
T303_03805	hypothetical protein	not assigned	not assigned	not assigned	not assigned	not assigned	not assigned	NOHIT
T303_03810	hypothetical protein	not assigned	not assigned	not assigned	not assigned	not assigned	not assigned	NOHIT
T303_03815	hypothetical protein	not assigned	not assigned	not assigned	not assigned	not assigned	not assigned	PTHR36287:SF2
T303_03820	cell surface protein	not assigned	not assigned	not assigned	not assigned	not assigned	not assigned	PTHR36287:SF2
T303_03825	hypothetical protein	not assigned	not assigned	not assigned	not assigned	not assigned	not assigned	NOHIT
T303_03830	multidrug ABC transporter ATP-binding protein	K18887	efrA	ATP-binding cassette, subfamily B, multidrug efflux pump	COG1132	V	Defense mechanisms	PTHR24221:SF276
T303_03835	ABC transporter	K18888	efrB	ATP-binding cassette, subfamily B, multidrug efflux pump	COG1132	V	Defense mechanisms	PTHR24221:SF425
T303_03840	S-adenosylmethionine tRNA ribosyltransferase	K07568	queA	S-adenosylmethionine:tRNA ribosyltransferase-isomerase [EC:2.4.99.17]	COG0809	J	Translation, ribosomal structure and biogenesis	PTHR30307:SF0
T303_03845	glucosamine-6-phosphate isomerase	K02564	nagB, GNPDA	glucosamine-6-phosphate deaminase [EC:3.5.99.6]	COG0363	G	Carbohydrate transport and metabolism	PTHR11280:SF5
T303_03850	sensor histidine kinase	not assigned	not assigned	not assigned	not assigned	not assigned	not assigned	PTHR24421:SF10
T303_03855	response regulator	not assigned	not assigned	not assigned	COG3279	T,K	Signal transduction mechanisms	PTHR43412:SF1
T303_03860	molybdopterin biosynthesis protein MoeB	not assigned	not assigned	not assigned	COG0476	H	Coenzyme transport and metabolism	PTHR10953:SF102
T303_03865	ABC transporter ATP-binding protein	K01990	ABC-2.A	ABC-2 type transport system ATP-binding protein	COG1131	V	Defense mechanisms	PTHR42711
T303_03870	ABC transporter permease	K01992	ABC-2.P	ABC-2 type transport system permease protein	not assigned	not assigned	not assigned	PTHR43229
T303_03875	sulfurtransferase	K07146	K07146	UPF0176 protein	COG1054	R	General function prediction only	PTHR43268:SF3
T303_03880	transcriptional regulator	K07729	K07729	putative transcriptional regulator	COG1476	K	Transcription	PTHR46558:SF3
T303_03885	hypothetical protein	not assigned	not assigned	not assigned	not assigned	not assigned	not assigned	NOHIT
T303_03890	phosphorylase	not assigned	not assigned	not assigned	not assigned	not assigned	not assigned	PTHR43691:SF9
T303_03895	membrane protein	not assigned	not assigned	not assigned	COG1814	P	Inorganic ion transport and metabolism	PTHR31851:SF31
T303_03900	16S pseudouridylate synthase	K06183	rsuA	16S rRNA pseudouridine516 synthase [EC:5.4.99.19]	COG1187	J	Translation, ribosomal structure and biogenesis	PTHR21600:SF19
T303_03905	peptidase M20	not assigned	not assigned	not assigned	COG1473	R	General function prediction only	PTHR11014:SF141
T303_03910	alanine dehydrogenase	not assigned	not assigned	not assigned	not assigned	not assigned	not assigned	PTHR42795:SF1
T303_03915	alanine dehydrogenase	K00259	ald	alanine dehydrogenase [EC:1.4.1.1]	not assigned	not assigned	not assigned	PTHR42795:SF1
T303_03920	pyridine nucleotide-disulfide oxidoreductase	not assigned	not assigned	not assigned	COG1249	C	Energy production and conversion	PTHR43256:SF5
T303_03925	hypothetical protein	K09962	K09962	uncharacterized protein	COG3575	S	Function unknown	PTHR39166:SF1
T303_03930	mevalonate kinase	K00869	E2.7.1.36, MVK, mvaK1	mevalonate kinase [EC:2.7.1.36]	COG1577	I	Lipid transport and metabolism	PTHR43290
T303_03935	diphosphomevalonate decarboxylase	K01597	MVD, mvaD	diphosphomevalonate decarboxylase [EC:4.1.1.33]	COG3407	I	Lipid transport and metabolism	PTHR10977:SF4
T303_03940	phosphomevalonate kinase	K00938	E2.7.4.2, mvaK2	phosphomevalonate kinase [EC:2.7.4.2]	COG1577	I	Lipid transport and metabolism	PTHR31814:SF4
T303_03945	isopentenyl pyrophosphate isomerase	K01823	idi, IDI	isopentenyl-diphosphate Delta-isomerase [EC:5.3.3.2]	COG1304	C,R,I	Energy production and conversion	PTHR43665:SF1
T303_03950	hypothetical protein	not assigned	not assigned	not assigned	not assigned	not assigned	not assigned	NOHIT
T303_03955	N-acetylglucosamine-1-phosphate uridyltransferase	K04042	glmU	bifunctional UDP-N-acetylglucosamine pyrophosphorylase / Glucosamine-1-phosphate N-acetyltransferase [EC:2.7.7.23 2.3.1.157]	COG1207	M	Cell wall/membrane/envelope biogenesis	PTHR43584:SF3
T303_03960	ADP-ribose pyrophosphatase	K01515	nudF	ADP-ribose pyrophosphatase [EC:3.6.1.13]	COG0494	V	Defense mechanisms	PTHR11839:SF1
T303_03965	hypothetical protein	not assigned	not assigned	not assigned	not assigned	not assigned	not assigned	NOHIT
T303_03970	5'-methylthioadenosine/S-adenosylhomocysteine nucleosidase	K01243	mtnN, mtn, pfs	adenosylhomocysteine nucleosidase [EC:3.2.2.9]	COG0775	F	Nucleotide transport and metabolism	PTHR46832:SF1
T303_03975	hypothetical protein	not assigned	not assigned	not assigned	not assigned	not assigned	not assigned	NOHIT
T303_03980	peptidase	not assigned	not assigned	not assigned	not assigned	not assigned	not assigned	NOHIT
T303_03985	hypothetical protein	not assigned	not assigned	not assigned	not assigned	not assigned	not assigned	NOHIT
T303_03990	glycosyl transferase family 1	K13677	dgs, bgsA	1,2-diacylglycerol-3-alpha-glucose alpha-1,2-glucosyltransferase [EC:2.4.1.208]	COG0438	M	Cell wall/membrane/envelope biogenesis	PTHR45947:SF3
T303_03995	1,2-diacylglycerol 3-glucosyltransferase	K19002	mgs, bgsB	1,2-diacylglycerol 3-alpha-glucosyltransferase [EC:2.4.1.337]	COG0438	M	Cell wall/membrane/envelope biogenesis	PTHR45947:SF3
T303_04005	threonyl-tRNA synthase	K01868	TARS, thrS	threonyl-tRNA synthetase [EC:6.1.1.3]	COG0441	J	Translation, ribosomal structure and biogenesis	PTHR11451:SF31
T303_04010	hydrolase	not assigned	not assigned	not assigned	not assigned	not assigned	not assigned	PTHR43139
T303_04015	hypothetical protein	not assigned	not assigned	not assigned	not assigned	not assigned	not assigned	NOHIT
T303_04020	hypothetical protein	not assigned	not assigned	not assigned	not assigned	not assigned	not assigned	NOHIT
T303_04025	hemolysin III-like protein	K11068	hlyIII	hemolysin III	COG1272	U	Intracellular trafficking, secretion, and vesicular transport	PTHR20855:SF91
T303_04035	3-hydroxy-3-methylglutaryl-CoA reductase	K00054	mvaA	hydroxymethylglutaryl-CoA reductase [EC:1.1.1.88]	COG1257	I	Lipid transport and metabolism	PTHR10572:SF26
T303_04040	hydroxymethylglutaryl-CoA synthase	K01641	E2.3.3.10	hydroxymethylglutaryl-CoA synthase [EC:2.3.3.10]	COG3425	I	Lipid transport and metabolism	PTHR43323:SF2
T303_04045	thymidylate synthase	K00560	thyA, TYMS	thymidylate synthase [EC:2.1.1.45]	COG0207	F	Nucleotide transport and metabolism	PTHR11548:SF1
T303_04050	dihydrofolate reductase	K00287	DHFR, folA	dihydrofolate reductase [EC:1.5.1.3]	COG0262	H	Coenzyme transport and metabolism	PTHR22778:SF16
T303_04055	hypothetical protein	not assigned	not assigned	not assigned	not assigned	not assigned	not assigned	NOHIT
T303_04060	ATP-dependent protease	K03544	clpX, CLPX	ATP-dependent Clp protease ATP-binding subunit ClpX	COG1219	O	Posttranslational modification, protein turnover, chaperones	PTHR11262:SF4
T303_04065	GTP-binding protein YsxC	K03978	engB	GTP-binding protein	COG0218	D	Cell cycle control, cell division, chromosome partitioning	PTHR11649:SF13
T303_04070	amino acid transporter	K16235	mmuP	S-methylmethionine transporter	COG0833	E	Amino acid transport and metabolism	PTHR43341:SF5
T303_04075	homocysteine methyltransferase	K00547	mmuM, BHMT2	homocysteine S-methyltransferase [EC:2.1.1.10]	COG2040	E	Amino acid transport and metabolism	PTHR46015
T303_04080	aldose 1-epimeras	not assigned	not assigned	not assigned	not assigned	not assigned	not assigned	NOHIT
T303_04085	hypothetical protein	not assigned	not assigned	not assigned	not assigned	not assigned	not assigned	NOHIT
T303_04090	glycerol-3-phosphate acyltransferase	K08591	plsY	glycerol-3-phosphate acyltransferase PlsY [EC:2.3.1.15]	COG0344	I	Lipid transport and metabolism	PTHR30309:SF0
T303_04095	DNA topoisomerase IV subunit B	K02622	parE	topoisomerase IV subunit B [EC:5.99.1.-]	COG0187	L	Replication, recombination and repair	PTHR45866:SF6
T303_04100	DNA topoisomerase IV subunit A	K02621	parC	topoisomerase IV subunit A [EC:5.99.1.-]	COG0188	L	Replication, recombination and repair	PTHR43493:SF7
T303_04105	branched-chain amino acid aminotransferase	K00826	E2.6.1.42, ilvE	branched-chain amino acid ami notransferase [EC:2.6.1.42]	COG0115	E,H	Amino acid transport and metabolism	PTHR42825:SF2
T303_04110	branched-chain amino acid aminotransferase	not assigned	not assigned	not assigned	not assigned	not assigned	not assigned	NOHIT
T303_04115	tRNA Tyr	K14236	tRNA-Tyr	tRNA Tyr	not assigned	not assigned	not assigned	NOHIT
T303_04120	tRNA Gln	K14223	tRNA-Gln	tRNA Gln	not assigned	not assigned	not assigned	NOHIT
T303_04125	30S ribosomal protein S1	K02945	RP-S1, rpsA	small subunit ribosomal protein S1	COG0539	J	Translation, ribosomal structure and biogenesis	PTHR10724:SF7
T303_04130	tRNA Arg	K14219	tRNA-Arg	tRNA Arg	not assigned	not assigned	not assigned	NOHIT
T303_04135	hypothetical protein	not assigned	not assigned	not assigned	not assigned	not assigned	not assigned	NOHIT
T303_04140	hypothetical protein	not assigned	not assigned	not assigned	COG0398	S	Function unknown	PTHR46826:SF2
T303_04145	peptidoglycan branched peptide synthesis protein	K12554	murN	alanine adding enzyme [EC:2.3.2.-]	COG2348	M	Cell wall/membrane/envelope biogenesis	PTHR36174:SF2
T303_04155	ribose 5-phosphate isomerase	not assigned	not assigned	not assigned	not assigned	not assigned	not assigned	NOHIT
T303_04160	NUDIX hydrolase	K03574	mutT, NUDT15, MTH2	8-oxo-dGTP diphosphatase [EC:3.6.1.55]	COG0494	V	Defense mechanisms	PTHR21340:SF4
T303_04165	ATP-dependent Clp protease ATP-binding protein	K03697	clpE	ATP-dependent Clp protease ATP-binding subunit ClpE	COG0542	O	Posttranslational modification, protein turnover, chaperones	PTHR43572:SF12
T303_04170	ornithine carbamoyltransferase	K00611	OTC, argF, argI	ornithine carbamoyltransferase [EC:2.1.3.3]	COG0078	E	Amino acid transport and metabolism	PTHR45753:SF1
T303_04175	hypothetical protein	not assigned	not assigned	not assigned	COG4703	S	Function unknown	NOHIT
T303_04180	glutamine ABC transporter permease	K02029	ABC.PA.P	polar amino acid transport system permease protein	COG0765	E	Amino acid transport and metabolism	PTHR30614:SF20
T303_04185	peptide ABC transporter ATP-binding protein	K02028	ABC.PA.A	polar amino acid transport system ATP-binding protein [EC:7.4.2.1]	COG1126	E	Amino acid transport and metabolism	PTHR43166:SF4
T303_04190	iron transporter FeoA	K04758	feoA	ferrous iron transport protein A	COG1918	P	Inorganic ion transport and metabolism	PTHR42954
T303_04195	ferrous iron transporter B	K04759	feoB	ferrous iron transport protein B	COG0370	P	Inorganic ion transport and metabolism	PTHR43185:SF1
T303_04200	membrane protein	not assigned	not assigned	not assigned	not assigned	not assigned	not assigned	NOHIT
T303_04205	dTDP-4-dehydrorhamnose 3,5-epimerase	K01790	rfbC, rmlC	dTDP-4-dehydrorhamnose 3,5-epimerase [EC:5.1.3.13]	COG1898	M	Cell wall/membrane/envelope biogenesis	PTHR21047
T303_04210	transcriptional regulator	K20374	rgg3	HTH-type transcriptional regulator, SHP3-responsive repressor	not assigned	not assigned	not assigned	PTHR37038:SF12
T303_04215	lysophospholipase	not assigned	not assigned	not assigned	not assigned	not assigned	not assigned	PTHR43329:SF4
T303_04220	hypothetical protein	not assigned	not assigned	not assigned	not assigned	not assigned	not assigned	NOHIT
T303_04225	hypothetical protein	not assigned	not assigned	not assigned	not assigned	not assigned	not assigned	NOHIT
T303_04230	tetrahydrofolate dehydrogenase	K01491	folD	methylenetetrahydrofolate dehydrogenase (NADP+) / methenyltetrahydrofolate cyclohydrolase [EC:1.5.1.5 3.5.4.9]	COG0190	H	Coenzyme transport and metabolism	PTHR10025
T303_04235	carbohydrate kinase	not assigned	not assigned	not assigned	COG0063	F	Nucleotide transport and metabolism	PTHR12592:SF0
T303_04240	penicillin-binding protein 2B	K00687	pbp2B, penA	penicillin-binding protein 2B	COG0768	M,D	Cell wall/membrane/envelope biogenesis	PTHR30627:SF2
T303_04245	recombinase RecR	K06187	recR	recombination protein RecR	COG0353	L	Replication, recombination and repair	PTHR30446:SF0
T303_04255	metalloprotease	K07042	ybeY, yqfG	probable rRNA maturation factor	COG0319	J	Translation, ribosomal structure and biogenesis	PTHR22881:SF18
T303_04260	diacylglycerol kinase	K00887	dgkA	undecaprenol kinase [EC:2.7.1.66]	COG0818	I	Lipid transport and metabolism	PTHR34299:SF1
T303_04265	GTP-binding protein	K03595	era, ERAL1	GTPase	COG1159	J	Translation, ribosomal structure and biogenesis	PTHR42698:SF2
T303_04270	formamidopyrimidine-DNA glycosylase	K10563	mutM, fpg	formamidopyrimidine-DNA glycosylase [EC:3.2.2.23 4.2.99.18]	COG0266	L	Replication, recombination and repair	PTHR22993:SF9
T303_04275	dephospho-CoA kinase	K00859	coaE	dephospho-CoA kinase [EC:2.7.1.24]	COG0237	H	Coenzyme transport and metabolism	PTHR10695:SF35
T303_04285	50S ribosomal protein L33	K02913	RP-L33, MRPL33, rpmG	large subunit ribosomal protein L33	COG0267	J	Translation, ribosomal structure and biogenesis	PTHR43168:SF6
T303_04290	preprotein translocase subunit SecG	K03075	secG	preprotein translocase subunit SecG	COG1314	U	Intracellular trafficking, secretion, and vesicular transport	PTHR34182:SF1
T303_04295	ribonuclease R	K12573	rnr, vacB	ribonuclease R [EC:3.1.-.-]	COG0557	K	Transcription	PTHR23355:SF9
T303_04300	single-stranded DNA-binding protein	K03664	smpB	SsrA-binding protein	COG0691	O	Posttranslational modification, protein turnover, chaperones	PTHR30308:SF2
T303_04305	peptidyl-prolyl cis-trans isomerase	K03768	PPIB, ppiB	peptidyl-prolyl cis-trans isomerase B (cyclophilin B) [EC:5.2.1.8]	COG0652	O	Posttranslational modification, protein turnover, chaperones	PTHR45625:SF5
T303_04310	hypothetical protein	K07570	GSP13	general stress protein 13	COG1098	R	General function prediction only	PTHR10724:SF7
T303_04315	dipeptidase	K01271	pepQ	Xaa-Pro dipeptidase [EC:3.4.13.9]	COG0006	E	Amino acid transport and metabolism	PTHR46112:SF2
T303_04320	catabolite control protein A	K02529	lacI, galR	LacI family transcriptional regulator	COG1609	K	Transcription	PTHR30146:SF99
T303_04325	MmcQ protein	not assigned	not assigned	not assigned	not assigned	not assigned	not assigned	NOHIT
T303_04335	glycerate kinase	K00865	glxK, garK	glycerate 2-kinase [EC:2.7.1.165]	COG1929	G	Carbohydrate transport and metabolism	PTHR21599
T303_04340	glycogen synthase	not assigned	not assigned	not assigned	COG5506	S	Function unknown	NOHIT
T303_04345	enolase	K01689	ENO, eno	enolase [EC:4.2.1.11]	COG0148	G	Carbohydrate transport and metabolism	PTHR11902:SF1
T303_04350	isoleucyl-tRNA synthetase	not assigned	not assigned	not assigned	not assigned	not assigned	not assigned	NOHIT
T303_04355	alkaline phosphatase	K19005	ltaS	lipoteichoic acid synthase [EC:2.7.8.20]	COG1368	M	Cell wall/membrane/envelope biogenesis	PTHR47371
T303_04360	SAM-dependent methyltransferase	K06969	rlmI	23S rRNA (cytosine1962-C5)-methyltransferase [EC:2.1.1.191]	COG1092	J	Translation, ribosomal structure and biogenesis	PTHR43042:SF3
T303_04365	3-dehydroquinate dehydratase	K03785	aroD	3-dehydroquinate dehydratase I [EC:4.2.1.10]	COG0710	E	Amino acid transport and metabolism	PTHR43699:SF1
T303_04370	shikimate 5-dehydrogenase	K00014	aroE	shikimate dehydrogenase [EC:1.1.1.25]	COG0169	E	Amino acid transport and metabolism	PTHR21089:SF1
T303_04375	3-dehydroquinate synthase	K01735	aroB	3-dehydroquinate synthase [EC:4.2.3.4]	COG0337	E	Amino acid transport and metabolism	PTHR43622:SF1
T303_04380	chorismate synthase	K01736	aroC	chorismate synthase [EC:4.2.3.5]	COG0082	E	Amino acid transport and metabolism	PTHR21085:SF1
T303_04385	prephenate dehydrogenase	K04517	tyrA2	prephenate dehydrogenase [EC:1.3.1.12]	COG0287	E	Amino acid transport and metabolism	PTHR21363
T303_04390	hypothetical protein	not assigned	not assigned	not assigned	COG3679	T	Signal transduction mechanisms	NOHIT
T303_04395	L-2-hydroxyisocaproate dehydrogenase	K00016	LDH, ldh	L-lactate dehydrogenase [EC:1.1.1.27]	COG0039	C	Energy production and conversion	PTHR43128:SF7
T303_04400	3-phosphoshikimate 1-carboxyvinyltransferase	K00800	aroA	3-phosphoshikimate 1-carboxyvinyltransferase [EC:2.5.1.19]	COG0128	E	Amino acid transport and metabolism	PTHR21090:SF5
T303_04405	shikimate kinase	K00891	E2.7.1.71, aroK, aroL	shikimate kinase [EC:2.7.1.71]	COG0703	E	Amino acid transport and metabolism	PTHR21087:SF0
T303_04410	prephenate dehydratase	K04518	pheA2	prephenate dehydratase [EC:4.2.1.51]	COG0077	E	Amino acid transport and metabolism	PTHR21022:SF0
T303_04415	LytR family transcriptional regulator	not assigned	not assigned	not assigned	COG1316	M	Cell wall/membrane/envelope biogenesis	PTHR33392:SF8
T303_04420	ethanolamine utilization protein EutJ	K11041	eta	exfoliative toxin A/B	COG1275	V	Defense mechanisms	PTHR37955:SF1
T303_04425	dehydrogenase	not assigned	not assigned	not assigned	COG1960	I	Lipid transport and metabolism	PTHR43835:SF14
T303_04430	alkylhydroperoxidase	not assigned	not assigned	not assigned	COG2128	P	Inorganic ion transport and metabolism	PTHR35446:SF2
T303_04435	RNA methyltransferase	K03215	rumA	23S rRNA (uracil1939-C5)-methyltransferase [EC:2.1.1.190]	COG2265	J	Translation, ribosomal structure and biogenesis	PTHR11061
T303_04450	hypothetical protein	not assigned	not assigned	not assigned	not assigned	not assigned	not assigned	NOHIT
T303_04455	hypothetical protein	not assigned	not assigned	not assigned	not assigned	not assigned	not assigned	NOHIT
T303_04470	transposase	K07483	K07483	transposase	COG2963	X	Mobilome - prophages, transposons	PTHR33215
T303_04480	bacteriocin immunity protein	not assigned	not assigned	not assigned	not assigned	not assigned	not assigned	NOHIT
T303_04490	hypothetical protein	not assigned	not assigned	not assigned	COG3272	S	Function unknown	PTHR30087:SF0
T303_04495	pyrimidine dimer DNA glycosylase	not assigned	not assigned	not assigned	not assigned	not assigned	not assigned	NOHIT
T303_04505	hypothetical protein	not assigned	not assigned	not assigned	not assigned	not assigned	not assigned	NOHIT
T303_04515	hypothetical protein	not assigned	not assigned	not assigned	not assigned	not assigned	not assigned	NOHIT
T303_04520	hypothetical protein	not assigned	not assigned	not assigned	not assigned	not assigned	not assigned	NOHIT
T303_04525	hypothetical protein	not assigned	not assigned	not assigned	not assigned	not assigned	not assigned	NOHIT
T303_04530	CRISPR-associated protein Csn1	K09952	csn1, cas9	CRISPR-associated endonuclease Csn1 [EC:3.1.-.-]	COG3513	V	Defense mechanisms	PTHR33877:SF2
T303_04535	CRISPR-associated protein Cas1	K15342	cas1	CRISP-associated protein Cas1	COG1518	V	Defense mechanisms	PTHR34353:SF2
T303_04540	CRISPR-associated protein Cas2	K09951	cas2	CRISPR-associated protein Cas2	COG3512	V	Defense mechanisms	NOHIT
T303_04545	hypothetical protein	not assigned	not assigned	not assigned	not assigned	not assigned	not assigned	NOHIT
T303_04550	phosphate ABC transporter substrate-binding protein	K08986	ycgQ	putative membrane protein	COG3689	S	Function unknown	PTHR40047:SF1
T303_04555	membrane protein	K07089	K07089	uncharacterized protein	COG0701	S	Function unknown	PTHR34184:SF4
T303_04560	hypothetical protein	not assigned	not assigned	not assigned	not assigned	not assigned	not assigned	NOHIT
T303_04565	S1 RNA-binding protein	K06959	tex	protein Tex	COG2183	K	Transcription	PTHR10724:SF10
T303_04570	sprT-like protein	K03095	sprL	SprT-like protein	COG3091	R	General function prediction only	PTHR38773:SF1
T303_04575	membrane protein	not assigned	not assigned	not assigned	COG1983	T,K	Signal transduction mechanisms	PTHR33885:SF3
T303_04580	HPr kinase/phosphorylase	K06023	hprK, ptsK	HPr kinase/phosphorylase [EC:2.7.11.- 2.7.4.-]	COG1493	T	Signal transduction mechanisms	PTHR30305:SF1
T303_04585	prolipoprotein diacylglyceryl transferase	K13292	lgt, umpA	phosphatidylglycerol---prolipoprotein diacylglyceryl transferase [EC:2.5.1.145]	COG0682	M	Cell wall/membrane/envelope biogenesis	PTHR30589:SF0
T303_04590	chemotaxis protein	not assigned	not assigned	not assigned	COG4768	S	Function unknown	PTHR40070:SF1
T303_04595	hypothetical protein	not assigned	not assigned	not assigned	not assigned	not assigned	not assigned	PTHR35792
T303_04600	hypothetical protein	not assigned	not assigned	not assigned	not assigned	not assigned	not assigned	NOHIT
T303_04605	peptidase family U32	not assigned	not assigned	not assigned	COG0826	O	Posttranslational modification, protein turnover, chaperones	PTHR30217:SF12
T303_04610	protease	K08303	K08303	putative protease [EC:3.4.-.-]	COG0826	O	Posttranslational modification, protein turnover, chaperones	PTHR30217:SF6
T303_04615	transposase IS1193	not assigned	not assigned	not assigned	COG3464	X	Mobilome - prophages, transposons	PTHR33498:SF1
T303_04625	hypothetical protein	not assigned	not assigned	not assigned	not assigned	not assigned	not assigned	NOHIT
T303_04630	seryl-tRNA synthetase	not assigned	not assigned	not assigned	COG4443	S	Function unknown	NOHIT
T303_04635	transposase IS1193	not assigned	not assigned	not assigned	COG3464	X	Mobilome - prophages, transposons	PTHR33498:SF1
T303_04640	manganese transporter	K03322	mntH	manganese transport protein	COG1914	P	Inorganic ion transport and metabolism	PTHR11706:SF33
T303_04645	hypothetical protein	not assigned	not assigned	not assigned	not assigned	not assigned	not assigned	NOHIT
T303_04650	DNA mismatch repair protein MutT	K03574	mutT, NUDT15, MTH2	8-oxo-dGTP diphosphatase [EC:3.6.1.55]	not assigned	not assigned	not assigned	PTHR47707:SF1
T303_04655	RNA helicase	not assigned	not assigned	not assigned	COG1061	L,K	Replication, recombination and repair	PTHR24031:SF589
T303_04660	transposase IS905	not assigned	not assigned	not assigned	COG3328	X	Mobilome - prophages, transposons	PTHR33217
T303_04665	lysyl-tRNA synthetase	K04567	KARS, lysS	lysyl-tRNA synthetase, class II [EC:6.1.1.6]	COG1190	J	Translation, ribosomal structure and biogenesis	PTHR42918:SF9
T303_04670	peptidoglycan-binding protein	not assigned	not assigned	not assigned	not assigned	not assigned	not assigned	PTHR33734
T303_04675	Valyl-tRNA synthetase	not assigned	not assigned	not assigned	not assigned	not assigned	not assigned	NOHIT
T303_04680	HAD family hydrolase	K07025	K07025	putative hydrolase of the HAD superfamily	COG1011	H	Coenzyme transport and metabolism	PTHR46470
T303_04685	hypothetical protein	not assigned	not assigned	not assigned	not assigned	not assigned	not assigned	NOHIT
T303_04690	phosphoglycerate mutase	K15634	gpmB	probable phosphoglycerate mutase [EC:5.4.2.12]	COG0406	G	Carbohydrate transport and metabolism	PTHR23029:SF83
T303_04695	prolyl-tRNA synthetase	K03976	ybaK, ebsC	Cys-tRNA(Pro)/Cys-tRNA(Cys) deacylase [EC:3.1.1.-]	COG2606	J	Translation, ribosomal structure and biogenesis	PTHR30411:SF0
T303_04700	N-acetylmuramoyl-L-alanine amidase	K07273	acm	lysozyme	COG3757	M	Cell wall/membrane/envelope biogenesis	PTHR34135:SF1
T303_04705	sodium transporter	not assigned	not assigned	not assigned	not assigned	not assigned	not assigned	NOHIT
T303_04710	membrane protein	not assigned	not assigned	not assigned	not assigned	not assigned	not assigned	NOHIT
T303_04715	hypothetical protein	not assigned	not assigned	not assigned	not assigned	not assigned	not assigned	NOHIT
T303_04720	hypothetical protein	not assigned	not assigned	not assigned	not assigned	not assigned	not assigned	NOHIT
T303_04725	lipase	not assigned	not assigned	not assigned	not assigned	not assigned	not assigned	NOHIT
T303_04735	hypothetical protein	not assigned	not assigned	not assigned	not assigned	not assigned	not assigned	NOHIT
T303_04740	type I restriction-modification system restriction subunit	K01153	hsdR	type I restriction enzyme, R subunit [EC:3.1.21.3]	COG0610	V	Defense mechanisms	PTHR30195:SF15
T303_04745	hypothetical protein	not assigned	not assigned	not assigned	not assigned	not assigned	not assigned	NOHIT
T303_04750	hypothetical protein	not assigned	not assigned	not assigned	not assigned	not assigned	not assigned	NOHIT
T303_04755	hypothetical protein	not assigned	not assigned	not assigned	not assigned	not assigned	not assigned	NOHIT
T303_04760	hypothetical protein	not assigned	not assigned	not assigned	not assigned	not assigned	not assigned	NOHIT
T303_04765	type I restriction-modification system specificty subunit	K01154	hsdS	type I restriction enzyme, S subunit [EC:3.1.21.3]	COG0732	V	Defense mechanisms	PTHR30408
T303_04770	NTPase	not assigned	not assigned	not assigned	not assigned	not assigned	not assigned	NOHIT
T303_04775	hypothetical protein	not assigned	not assigned	not assigned	not assigned	not assigned	not assigned	NOHIT
T303_04780	type I restriction-modification system methyltransferase subunit	K03427	hsdM	type I restriction enzyme M protein [EC:2.1.1.72]	COG0286	V	Defense mechanisms	PTHR42933:SF1
T303_04795	cytoplasmic membrane protein	K03744	lemA	LemA protein	COG1704	S	Function unknown	PTHR34478
T303_04800	heat shock protein HtpX	K03799	htpX	heat shock protein HtpX [EC:3.4.24.-]	COG0501	O	Posttranslational modification, protein turnover, chaperones	PTHR43221:SF1
T303_04805	membrane protein	not assigned	not assigned	not assigned	not assigned	not assigned	not assigned	NOHIT
T303_04810	hypothetical protein	not assigned	not assigned	not assigned	not assigned	not assigned	not assigned	PTHR10559
T303_04815	phosphoenolpyruvate carboxylase	K01595	ppc	phosphoenolpyruvate carboxylase [EC:4.1.1.31]	COG2352	C	Energy production and conversion	PTHR30523:SF13
T303_04820	DNA polymerase III subunit delta	K02340	holA	DNA polymerase III subunit delta [EC:2.7.7.7]	COG1466	L	Replication, recombination and repair	PTHR34388:SF1
T303_04825	superoxide dismutase	K04564	SOD2	superoxide dismutase, Fe-Mn family [EC:1.15.1.1]	COG0605	P	Inorganic ion transport and metabolism	PTHR43595:SF2
T303_04830	Peptidase family S11	not assigned	not assigned	not assigned	not assigned	not assigned	not assigned	PTHR35333:SF3
T303_04835	DNA protection during starvation protein	K04047	dps	starvation-inducible DNA-binding protein	COG0783	V,P	Defense mechanisms	PTHR42932:SF1
T303_04840	Fur family transcriptional regulator	K09825	perR	Fur family transcriptional regulator, peroxide stress response regulator	COG0735	P	Inorganic ion transport and metabolism	PTHR33202:SF8
T303_04845	hypothetical protein	not assigned	not assigned	not assigned	COG4483	S	Function unknown	NOHIT
T303_04850	glucokinase	K00845	glk	glucokinase [EC:2.7.1.2]	COG1940	G,K	Carbohydrate transport and metabolism	PTHR18964:SF160
T303_04855	GTP-binding protein	K06207	typA, bipA	GTP-binding protein	COG1217	T	Signal transduction mechanisms	PTHR42908:SF8
T303_04860	membrane protein	not assigned	not assigned	not assigned	not assigned	not assigned	not assigned	NOHIT
T303_04865	UDP-N-acetylmuramoyl-L-alanyl-D-glutamate synthetase	K01925	murD	UDP-N-acetylmuramoylalanine--D-glutamate ligase [EC:6.3.2.9]	COG0771	M	Cell wall/membrane/envelope biogenesis	PTHR43692:SF1
T303_04870	UDP diphospho-muramoylpentapeptide beta-N-acetylglucosaminyltransferase	K02563	murG	UDP-N-acetylglucosamine--N-acetylmuramyl-(pentapeptide) pyrophosphoryl-undecaprenol N-acetylglucosamine transferase [EC:2.4.1.227]	COG0707	M	Cell wall/membrane/envelope biogenesis	PTHR21015:SF27
T303_04880	cell division protein FtsA	K03590	ftsA	cell division protein FtsA	COG0849	D	Cell cycle control, cell division, chromosome partitioning	PTHR32432:SF4
T303_04885	cell division protein FtsZ	K03531	ftsZ	cell division protein FtsZ	COG0206	D	Cell cycle control, cell division, chromosome partitioning	PTHR30314:SF3
T303_04890	cell division protein	K06997	yggS, PROSC	PLP dependent protein	COG0325	R	General function prediction only	PTHR10146:SF5
T303_04895	cell division protein SepF	K09772	sepF	cell division inhibitor SepF	COG1799	D	Cell cycle control, cell division, chromosome partitioning	PTHR35798:SF1
T303_04900	membrane protein	K02221	yggT	YggT family protein	not assigned	not assigned	not assigned	PTHR33219:SF5
T303_04905	RNA binding protein	not assigned	not assigned	not assigned	COG2302	R	General function prediction only	PTHR32219:SF3
T303_04910	cell division protein DivIVA	K04074	divIVA	cell division initiation protein	COG3599	D	Cell cycle control, cell division, chromosome partitioning	PTHR35794:SF2
T303_04915	isoleucyl-tRNA synthetase	K01870	IARS, ileS	isoleucyl-tRNA synthetase [EC:6.1.1.5]	COG0060	J	Translation, ribosomal structure and biogenesis	PTHR42765
T303_04925	manganese transporter NRAMP family	not assigned	not assigned	not assigned	COG1914	P	Inorganic ion transport and metabolism	PTHR11706:SF3
T303_04930	50S ribosomal protein L31	K02909	RP-L31, rpmE	large subunit ribosomal protein L31	COG0254	J	Translation, ribosomal structure and biogenesis	PTHR33280:SF1
T303_04935	thiamine biosynthesis protein ApbE	K03734	apbE	FAD:protein FMN transferase [EC:2.7.1.180]	COG1477	H	Coenzyme transport and metabolism	PTHR30040:SF2
T303_04940	oligoribonuclease	K06881	nrnA	bifunctional oligoribonuclease and PAP phosphatase NrnA [EC:3.1.3.73.1.13.3]	COG0618	F	Nucleotide transport and metabolism	PTHR47618:SF1
T303_04945	glutathione S-transferase	K11209	yghU, yfcG	GSH-dependent disulfide-bond oxidoreductase [EC:1.8.4.-]	COG0625	O	Posttranslational modification, protein turnover, chaperones	PTHR44051:SF12
T303_04950	adenosine deaminase	K01488	add, ADA	adenosine deaminase [EC:3.5.4.4]	COG1816	F	Nucleotide transport and metabolism	PTHR11409:SF43
T303_04955	thymidine kinase	K00857	tdk, TK	thymidine kinase [EC:2.7.1.21]	COG1435	F	Nucleotide transport and metabolism	PTHR11441:SF0
T303_04960	peptide chain release factor 1	K02835	prfA, MTRF1, MRF1	peptide chain release factor 1	COG0216	J	Translation, ribosomal structure and biogenesis	PTHR43804:SF4
T303_04965	N5-glutamine S-adenosyl-L-methionine-dependent methyltransferase	K02493	hemK, prmC, HEMK	release factor glutamine methyltransferase [EC:2.1.1.297]	COG2890	J	Translation, ribosomal structure and biogenesis	PTHR18895:SF74
T303_04970	tRNA threonylcarbamoyl adenosine modification protein	K07566	tsaC, rimN, SUA5	L-threonylcarbamoyladenylate synthase [EC:2.7.7.87]	COG0009	J	Translation, ribosomal structure and biogenesis	PTHR17490:SF3
T303_04975	serine hydroxymethyltransferase	K00600	glyA, SHMT	glycine hydroxymethyltransferase [EC:2.1.2.1]	COG0112	E	Amino acid transport and metabolism	PTHR11680:SF30
T303_04980	hypothetical protein	not assigned	not assigned	not assigned	not assigned	not assigned	not assigned	NOHIT
T303_04985	hypothetical protein	not assigned	not assigned	not assigned	not assigned	not assigned	not assigned	PTHR34135:SF3
T303_04990	multidrug ABC transporter ATP-binding protein	K06148	ABCC-BAC	ATP-binding cassette, subfamily C, bacterial	COG1132	V	Defense mechanisms	PTHR24222:SF44
T303_04995	sugar ABC transporter ATP-binding protein	K06147	ABCB-BAC	ATP-binding cassette, subfamily B, bacterial	COG1132	V	Defense mechanisms	PTHR24221:SF424
T303_05000	putative component involved in D-alanylation of teichoic acids	not assigned	not assigned	not assigned	not assigned	not assigned	not assigned	NOHIT
T303_05005	D-alanine--poly(phosphoribitol) ligase	K03367	dltA	D-alanine--poly(phosphoribitol) ligase subunit 1 [EC:6.1.1.13]	not assigned	not assigned	not assigned	PTHR45398:SF1
T303_05010	D-alanyl-lipoteichoic acid biosynthesis protein DltB	K03739	dltB	membrane protein involved in D-alanine export	COG1696	M	Cell wall/membrane/envelope biogenesis	PTHR13285:SF23
T303_05015	D-alanine--poly(phosphoribitol) ligase	K14188	dltC	D-alanine--poly(phosphoribitol) ligase subunit 2 [EC:6.1.1.13]	COG0236	I,Q	Lipid transport and metabolism	PTHR20863:SF28
T303_05020	D-alanyl-lipoteichoic acid biosynthesis protein DltD	K03740	dltD	D-alanine transfer protein	COG3966	M	Cell wall/membrane/envelope biogenesis	PTHR40039:SF1
T303_05030	transposase IS861	K07497	K07497	putative transposase	not assigned	not assigned	not assigned	PTHR42648:SF3
T303_05040	Ca2+, Mn2+-P-type ATPase	not assigned	not assigned	not assigned	COG0474	P	Inorganic ion transport and metabolism	PTHR24093:SF369
T303_05045	anthranilate synthase	K03342	pabBC	para-aminobenzoate synthetase / 4-amino-4-deoxychorismate lyase [EC:2.6.1.85 4.1.3.38]	COG0147	E,H	Amino acid transport and metabolism	PTHR11236:SF18
T303_05050	hypothetical protein	not assigned	not assigned	not assigned	not assigned	not assigned	not assigned	NOHIT
T303_05055	hypothetical protein	not assigned	not assigned	not assigned	not assigned	not assigned	not assigned	NOHIT
T303_05060	hypothetical protein	not assigned	not assigned	not assigned	not assigned	not assigned	not assigned	NOHIT
T303_05065	hypothetical protein	not assigned	not assigned	not assigned	not assigned	not assigned	not assigned	NOHIT
T303_05070	hypothetical protein	not assigned	not assigned	not assigned	not assigned	not assigned	not assigned	NOHIT
T303_05075	DNA primase	K06919	K06919	putative DNA primase/helicase	not assigned	not assigned	not assigned	PTHR35372:SF2
T303_05080	hypothetical protein	not assigned	not assigned	not assigned	not assigned	not assigned	not assigned	NOHIT
T303_05085	hypothetical protein	not assigned	not assigned	not assigned	not assigned	not assigned	not assigned	NOHIT
T303_05090	hypothetical protein	not assigned	not assigned	not assigned	not assigned	not assigned	not assigned	NOHIT
T303_05095	hypothetical protein	not assigned	not assigned	not assigned	not assigned	not assigned	not assigned	NOHIT
T303_05100	hypothetical protein	not assigned	not assigned	not assigned	not assigned	not assigned	not assigned	NOHIT
T303_05105	hypothetical protein	not assigned	not assigned	not assigned	not assigned	not assigned	not assigned	NOHIT
T303_05110	XRE family transcriptional regulator	not assigned	not assigned	not assigned	COG3655	K	Transcription	PTHR46797
T303_05115	XRE family transcriptional regulator	not assigned	not assigned	not assigned	COG1476	K	Transcription	PTHR46558
T303_05120	DNA integrase	not assigned	not assigned	not assigned	COG4974	L	Replication, recombination and repair	PTHR30349:SF58
T303_05125	hypothetical protein	not assigned	not assigned	not assigned	not assigned	not assigned	not assigned	NOHIT
T303_05130	5-methyltetrahydropteroyltriglutamate--homocysteine methyltransferase	K00549	metE	5-methyltetrahydropteroyltriglutamate--homocysteine methyltransferase [EC:2.1.1.14]	COG0620	E	Amino acid transport and metabolism	PTHR30519:SF0
T303_05135	5,10-methylenetetrahydrofolate reductase	K00297	metF, MTHFR	methylenetetrahydrofolate reductase (NADPH) [EC:1.5.1.20]	COG0685	E	Amino acid transport and metabolism	PTHR45754:SF2
T303_05140	phosphoglucomutase	K01835	pgm	phosphoglucomutase [EC:5.4.2.2]	COG1109	G	Carbohydrate transport and metabolism	PTHR45745:SF1
T303_05145	membrane protein	not assigned	not assigned	not assigned	COG4684	S	Function unknown	NOHIT
T303_05150	phosphopantothenoylcysteine decarboxylase	K01598	PPCDC, coaC	phosphopantothenoylcysteine decarboxylase [EC:4.1.1.36]	not assigned	not assigned	not assigned	PTHR14359:SF6
T303_05155	phosphopantothenate--cysteine ligase	K01922	PPCS, COAB	phosphopantothenate---cysteine ligase (ATP) [EC:6.3.2.51]	not assigned	not assigned	not assigned	PTHR14359:SF22
T303_05160	formate--tetrahydrofolate ligase	K01938	fhs	formate--tetrahydrofolate ligase [EC:6.3.4.3]	COG2759	F	Nucleotide transport and metabolism	PTHR43274
T303_05175	transposase IS3	not assigned	not assigned	not assigned	COG2963	X	Mobilome - prophages, transposons	PTHR33795:SF1
T303_05180	transposase IS3	not assigned	not assigned	not assigned	COG2801	X	Mobilome - prophages, transposons	PTHR42648:SF3
T303_05185	transposase IS1193	not assigned	not assigned	not assigned	COG3464	X	Mobilome - prophages, transposons	PTHR33498:SF1
T303_05190	spermidine/putrescine ABC transporter permease	K11070	potC	spermidine/putrescine transport system permease protein	not assigned	not assigned	not assigned	PTHR43848:SF2
T303_05195	spermidine/putrescine ABC transporter substrate-binding protein	K11069	potD	spermidine/putrescine transport system substrate-binding protein	COG0687	E	Amino acid transport and metabolism	PTHR30222:SF5
T303_05200	ribonuclease HII	not assigned	not assigned	not assigned	COG0038	P	Inorganic ion transport and metabolism	PTHR45711:SF5
T303_05205	cell envelope serine proteinase	K01361	E3.4.21.96	lactocepin [EC:3.4.21.96]	COG1404	O	Posttranslational modification, protein turnover, chaperones	PTHR43806:SF11
T303_05215	transposase IS3	not assigned	not assigned	not assigned	COG2801	X	Mobilome - prophages, transposons	PTHR42648
T303_05220	transposase IS1193	not assigned	not assigned	not assigned	COG3464	X	Mobilome - prophages, transposons	PTHR33498:SF1
T303_05225	30S ribosomal protein S20	K02968	RP-S20, rpsT	small subunit ribosomal protein S20	COG0268	J	Translation, ribosomal structure and biogenesis	PTHR33398
T303_05230	pantothenate kinase	K00867	coaA	type I pantothenate kinase [EC:2.7.1.33]	COG1072	H	Coenzyme transport and metabolism	PTHR10285:SF6
T303_05235	16S rRNA methyltransferase	K00564	rsmC	16S rRNA (guanine1207-N2)-methyltransferase [EC:2.1.1.172]	not assigned	not assigned	not assigned	PTHR47816:SF2
T303_05250	cytidine deaminase	K01489	cdd, CDA	cytidine deaminase [EC:3.5.4.5]	COG0295	F	Nucleotide transport and metabolism	PTHR11644
T303_05255	membrane protein	K07335	bmpA, bmpB, tmpC	basic membrane protein A and related proteins	COG1744	M	Cell wall/membrane/envelope biogenesis	PTHR34296:SF2
T303_05260	heme ABC transporter ATP-binding protein	K02056	ABC.SS.A	simple sugar transport system ATP-binding protein [EC:3.6.3.17]	COG3845	R	General function prediction only	PTHR43790:SF4
T303_05265	branched-chain amino acid ABC transporter permease	K02057	ABC.SS.P	simple sugar transport system permease protein	COG4603	R	General function prediction only	PTHR47089:SF1
T303_05270	sugar ABC transporter permease	K02057	ABC.SS.P	simple sugar transport system permease protein	COG1079	R	General function prediction only	PTHR43370:SF1
T303_05275	hypothetical protein	not assigned	not assigned	not assigned	COG0491	R	General function prediction only	PTHR46233:SF3
T303_05280	helicase DinG	K03722	dinG	ATP-dependent DNA helicase DinG [EC:3.6.4.12]	COG1199	L	Replication, recombination and repair	PTHR11472:SF60
T303_05285	hypothetical protein	not assigned	not assigned	not assigned	COG5353	S	Function unknown	NOHIT
T303_05290	aspartate aminotransferase	not assigned	not assigned	not assigned	COG0436	E	Amino acid transport and metabolism	PTHR46383:SF1
T303_05295	asparaginyl-tRNA synthase	K01893	NARS, asnS	asparaginyl-tRNA synthetase [EC:6.1.1.22]	COG0017	J	Translation, ribosomal structure and biogenesis	PTHR22594:SF16
T303_05310	translation initiation inhibitor	not assigned	not assigned	not assigned	COG0251	V	Defense mechanisms	PTHR11803:SF13
T303_05315	7-cyano-7-deazaguanine synthase	K06920	queC	7-cyano-7-deazaguanine synthase [EC:6.3.4.20]	COG0603	J	Translation, ribosomal structure and biogenesis	PTHR42914:SF1
T303_05320	6-pyruvoyl tetrahydrobiopterin synthase	K01737	queD, ptpS, PTS	6-pyruvoyltetrahydropterin/6-carboxytetrahydropterin synthase [EC:4.2.3.12 4.1.2.50]	COG0720	H	Coenzyme transport and metabolism	PTHR12589
T303_05325	7-carboxy-7-deazaguanine synthase	K10026	queE	7-carboxy-7-deazaguanine synthase [EC:4.3.99.3]	COG0602	R	General function prediction only	PTHR42836:SF1
T303_05330	7-cyano-7-deazaguanine reductase	K09457	queF	7-cyano-7-deazaguanine reductase [EC:1.7.1.13]	COG0780	J	Translation, ribosomal structure and biogenesis	PTHR34354:SF1
T303_05335	hypothetical protein	not assigned	not assigned	not assigned	not assigned	not assigned	not assigned	NOHIT
T303_05340	serine protease	not assigned	not assigned	not assigned	not assigned	not assigned	not assigned	NOHIT
T303_05345	cyclic nucleotide-binding protein	not assigned	not assigned	not assigned	COG4420	S	Function unknown	PTHR41386:SF1
T303_05350	ATPase P	K06958	rapZ	RNase adapter protein RapZ	COG1660	T	Signal transduction mechanisms	PTHR30448:SF0
T303_05355	hypothetical protein	not assigned	not assigned	not assigned	COG0391	H,G	Coenzyme transport and metabolism	PTHR30135:SF3
T303_05360	sporulation protein	K09762	K09762	uncharacterized protein	COG1481	K	Transcription	PTHR37307:SF1
T303_05370	bacteriocin	not assigned	not assigned	not assigned	not assigned	not assigned	not assigned	NOHIT
T303_05375	cold-shock protein	K03704	cspA	cold shock protein (beta-ribbon, CspA family)	COG1278	K	Transcription	PTHR11544:SF115
T303_05380	cold-shock protein	K03704	cspA	cold shock protein (beta-ribbon, CspA family)	COG1278	K	Transcription	PTHR11544:SF115
T303_05385	transposase IS3	not assigned	not assigned	not assigned	COG2801	X	Mobilome - prophages, transposons	PTHR42648:SF3
T303_05390	transposase IS3	not assigned	not assigned	not assigned	COG2963	X	Mobilome - prophages, transposons	PTHR33795:SF1
T303_05395	transposase IS905	not assigned	not assigned	not assigned	COG3328	X	Mobilome - prophages, transposons	PTHR33217
T303_05400	hypothetical protein	not assigned	not assigned	not assigned	not assigned	not assigned	not assigned	NOHIT
T303_05405	ATPase	K01533	copB	Cu2+-exporting ATPase [EC:3.6.3.4]	COG2217	P	Inorganic ion transport and metabolism	PTHR43315:SF1
T303_05410	transposase IS905	not assigned	not assigned	not assigned	COG3328	X	Mobilome - prophages, transposons	PTHR33217
T303_05415	type I restriction-modification system restriction subunit	not assigned	not assigned	not assigned	not assigned	not assigned	not assigned	PTHR30195:SF15
T303_05420	cysteine synthase	K01738	cysK	cysteine synthase [EC:2.5.1.47]	COG0031	E	Amino acid transport and metabolism	PTHR10314:SF169
T303_05425	cystathionine beta-lyase	K01760	metC	cysteine-S-conjugate beta-lyase [EC:4.4.1.13]	COG0626	E	Amino acid transport and metabolism	PTHR11808:SF15
T303_05435	hypothetical protein	not assigned	not assigned	not assigned	not assigned	not assigned	not assigned	PTHR33217:SF5
T303_05450	DNA methyltransferase	K03427	hsdM	type I restriction enzyme M protein [EC:2.1.1.72]	not assigned	not assigned	not assigned	PTHR42933:SF1
T303_05455	sugar transporter	K05340	glcU	glucose uptake protein	COG4975	G	Carbohydrate transport and metabolism	PTHR16119:SF22
T303_05460	hypothetical protein	not assigned	not assigned	not assigned	not assigned	not assigned	not assigned	PTHR37417:SF3
T303_05465	restriction endonuclease subunit M	not assigned	not assigned	not assigned	not assigned	not assigned	not assigned	PTHR42933:SF1
T303_05470	hypothetical protein	not assigned	not assigned	not assigned	not assigned	not assigned	not assigned	PTHR36844:SF1
T303_05475	zinc ABC transporter substrate-binding protein	K09815	znuA	zinc transport system substrate-binding protein	COG0803	P	Inorganic ion transport and metabolism	PTHR42953:SF3
T303_05480	hypothetical protein	not assigned	not assigned	not assigned	not assigned	not assigned	not assigned	NOHIT
T303_05485	hypothetical protein	not assigned	not assigned	not assigned	not assigned	not assigned	not assigned	NOHIT
T303_05490	membrane protein	not assigned	not assigned	not assigned	COG2855	S	Function unknown	PTHR30106:SF1
T303_05495	peptidoglycan hydrolase	not assigned	not assigned	not assigned	COG1705	N,M	Cell motility	PTHR33308:SF8
T303_05510	LysR family transcriptional regulator	not assigned	not assigned	not assigned	COG0583	K	Transcription	PTHR30346:SF0
T303_05515	glucosamine-fructose-6-phosphate aminotransferase	K00820	glmS, GFPT	glucosamine---fructose-6-phosphate ami notransferase (isomerizing) [EC:2.6.1.16]	COG0449	M	Cell wall/membrane/envelope biogenesis	PTHR10937:SF0
T303_05520	hypothetical protein	K06193	phnA	protein PhnA	COG2824	K	Transcription	PTHR30305:SF3
T303_05525	amino acid ABC transporter permease	K02029	ABC.PA.P	polar amino acid transport system permease protein	COG0765	E	Amino acid transport and metabolism	PTHR30614:SF0
T303_05530	amino acid ABC transporter ATPase	K02028	ABC.PA.A	polar amino acid transport system ATP-binding protein [EC:7.4.2.1]	COG1126	E	Amino acid transport and metabolism	PTHR43166:SF23
T303_05555	alcohol dehydrogenase	not assigned	not assigned	not assigned	not assigned	not assigned	not assigned	PTHR42940:SF7
T303_05565	hypothetical protein	not assigned	not assigned	not assigned	not assigned	not assigned	not assigned	NOHIT
T303_05575	GMP synthase	K01951	guaA, GMPS	GMP synthase (glutamine-hydrolysing) [EC:6.3.5.2]	COG0519	F	Nucleotide transport and metabolism	PTHR11922:SF2
T303_05580	GntR family transcriptional regulator	K03710	K03710	GntR family transcriptional regulator	COG2188	K	Transcription	PTHR44846
T303_05585	DNA-binding protein	K09787	K09787	uncharacterized protein	COG2739	K	Transcription	PTHR40083:SF1
T303_05590	signal recognition particle protein Srp54	K03106	SRP54, ffh	signal recognition particle subunit SRP54 [EC:3.6.5.4]	COG0541	U	Intracellular trafficking, secretion, and vesicular transport	PTHR11564:SF7
T303_05595	membrane protein	K16788	niaX	niacin transporter	not assigned	not assigned	not assigned	NOHIT
T303_05600	DeoR family transcriptional regulator	K07105	K07105	uncharacterized protein	COG1827	H,K	Coenzyme transport and metabolism	PTHR40068:SF1
T303_05605	DNA-binding protein	not assigned	not assigned	not assigned	COG2932	X	Mobilome - prophages, transposons	PTHR40661
T303_05610	ribosome biogenesis GTPase A	K14540	rbgA	ribosome biogenesis GTPase A	COG1161	J	Translation, ribosomal structure and biogenesis	PTHR45782:SF4
T303_05615	ribonuclease HII	K03470	rnhB	ribonuclease HII [EC:3.1.26.4]	COG0164	L	Replication, recombination and repair	PTHR10954:SF18
T303_05620	transcriptional regulator	not assigned	not assigned	not assigned	COG1940	G,K	Carbohydrate transport and metabolism	PTHR18964:SF151
T303_05625	DNA polymerase sliding clamp subunit	K04096	smf	DNA processing protein	COG0758	L	Replication, recombination and repair	PTHR43022:SF1
T303_05630	DNA topoisomerase I	K03168	topA	DNA topoisomerase I [EC:5.99.1.2]	COG0550	L	Replication, recombination and repair	PTHR42785:SF1
T303_05635	membrane protein	not assigned	not assigned	not assigned	not assigned	not assigned	not assigned	NOHIT
T303_05640	multidrug ABC transporter	K20488	nisR, spaR	two-component system, OmpR family, lantibiotic biosynthesis response regulator NisR/SpaR	COG0745	K,T	Transcription	PTHR26402:SF709
T303_05645	sensor histidine kinase	K20487	nisK, spaK	two-component system, OmpR family, lantibiotic biosynthesis sensor histidine kinase NisK/SpaK [EC:2.7.13.3]	COG0642	T	Signal transduction mechanisms	PTHR45528:SF1
T303_05650	tRNA (uracil-5-)-methyltransferase	K04094	trmFO, gid	methylenetetrahydrofolate--tRNA-(uracil-5-)-methyltransferase[EC:2.1.1.74]	COG1206	J	Translation, ribosomal structure and biogenesis	PTHR11806:SF2
T303_05655	5-methyltetrahydropteroyltriglutamate--homocysteine S-methyltransferase	not assigned	not assigned	not assigned	not assigned	not assigned	not assigned	PTHR43844
T303_05660	nucleoside diphosphate kinase	K00940	ndk, NME	nucleoside-diphosphate kinase [EC:2.7.4.6]	COG0105	F	Nucleotide transport and metabolism	PTHR11349:SF91
T303_05665	sulfurtransferase	not assigned	not assigned	not assigned	COG0607	P	Inorganic ion transport and metabolism	PTHR43031:SF2
T303_05675	hypothetical protein	not assigned	not assigned	not assigned	not assigned	not assigned	not assigned	NOHIT
T303_05680	GTP-binding protein LepA	K03596	lepA	GTP-binding protein LepA	COG0481	J	Translation, ribosomal structure and biogenesis	PTHR43512
T303_05685	MutR family transcriptional regulator	not assigned	not assigned	not assigned	not assigned	not assigned	not assigned	PTHR37038:SF12
T303_05695	transposase IS905	not assigned	not assigned	not assigned	COG3328	X	Mobilome - prophages, transposons	PTHR33217
T303_05700	hypothetical protein	not assigned	not assigned	not assigned	not assigned	not assigned	not assigned	NOHIT
T303_05705	radical SAM protein	not assigned	not assigned	not assigned	COG0535	R	General function prediction only	PTHR11228
T303_05715	permease of the major facilitator superfamily MFS	not assigned	not assigned	not assigned	not assigned	not assigned	not assigned	PTHR23513:SF11
T303_05720	acetolactate synthase	K01652	E2.2.1.6L, ilvB, ilvG, ilvI	acetolactate synthase I/II/III large subunit[EC:2.2.1.6]	COG0028	E,H	Amino acid transport and metabolism	PTHR18968:SF129
T303_05725	alpha-acetolactate decarboxylase	K01575	alsD, budA, aldC	acetolactate decarboxylase [EC:4.1.1.5]	COG3527	Q	Secondary metabolites biosynthesis, transport and catabolism	PTHR35524:SF1
T303_05735	ABC transporter permease	not assigned	not assigned	not assigned	not assigned	not assigned	not assigned	PTHR30287:SF1
T303_05740	short-chain dehydrogenase	not assigned	not assigned	not assigned	not assigned	not assigned	not assigned	PTHR43157:SF2
T303_05745	hypothetical protein	not assigned	not assigned	not assigned	not assigned	not assigned	not assigned	NOHIT
T303_05750	TetR family transcriptional regulator	not assigned	not assigned	not assigned	COG1309	K	Transcription	PTHR43479
T303_05755	cation transporter	K16264	czcD, zitB	cobalt-zinc-cadmium efflux system protein	COG1230	P	Inorganic ion transport and metabolism	PTHR11562:SF17
T303_05760	ferrochelatase	K01772	hemH, FECH	protoporphyrin/coproporphyrin ferrochelatase [EC:4.99.1.1 4.99.1.9]	COG0276	H	Coenzyme transport and metabolism	PTHR11108:SF1
T303_05765	molecular chaperone GroES	not assigned	not assigned	not assigned	COG1063	E,R	Amino acid transport and metabolism	PTHR42813:SF2
T303_05770	hypothetical protein	not assigned	not assigned	not assigned	not assigned	not assigned	not assigned	PTHR47751:SF1
T303_05775	hypothetical protein	not assigned	not assigned	not assigned	not assigned	not assigned	not assigned	NOHIT
T303_05780	alpha/beta hydrolase	not assigned	not assigned	not assigned	not assigned	not assigned	not assigned	NOHIT
T303_05785	hypothetical protein	not assigned	not assigned	not assigned	not assigned	not assigned	not assigned	NOHIT
T303_05795	hypothetical protein	not assigned	not assigned	not assigned	not assigned	not assigned	not assigned	NOHIT
T303_05800	phosphorylase	not assigned	not assigned	not assigned	COG2820	F	Nucleotide transport and metabolism	PTHR43691
T303_05805	5'-nucleotidase	K01091	gph	phosphoglycolate phosphatase [EC:3.1.3.18]	COG0546	C	Energy production and conversion	PTHR43434:SF6
T303_05810	ferrichrome ABC transporter substrate-binding protein	not assigned	not assigned	not assigned	not assigned	not assigned	not assigned	PTHR30532
T303_05815	hypothetical protein	not assigned	not assigned	not assigned	not assigned	not assigned	not assigned	NOHIT
T303_05825	dihydroorotate dehydrogenase	not assigned	not assigned	not assigned	COG1293	J	Translation, ribosomal structure and biogenesis	PTHR15239:SF6
T303_05830	membrane protein LaaN	not assigned	not assigned	not assigned	not assigned	not assigned	not assigned	NOHIT
T303_05835	4-methyl-5(B-hydroxyethyl)-thiazole monophosphate biosynthesis protein	K03152	thiJ	protein deglycase [EC:3.5.1.124]	COG0693	R	General function prediction only	PTHR43444:SF10
T303_05840	dihydroorotate dehydrogenase	K02823	pyrDII	dihydroorotate dehydrogenase electron transfer subunit	COG0543	C,H	Energy production and conversion	PTHR43513:SF1
T303_05845	dihydroorotate dehydrogenase	K17828	pyrDI	dihydroorotate dehydrogenase (NAD+) catalytic subunit [EC:1.3.1.14]	COG0167	F	Nucleotide transport and metabolism	PTHR43843
T303_05850	CRISPR-associated protein Cas1	K15342	cas1	CRISP-associated protein Cas1	COG1518	V	Defense mechanisms	PTHR34353:SF2
T303_05855	CRISPR-associated protein Cas2	K09951	cas2	CRISPR-associated protein Cas2	COG1343	V	Defense mechanisms	PTHR34405:SF3
T303_05860	CRISPR-associated protein Cas6	not assigned	not assigned	not assigned	COG5551	V	Defense mechanisms	NOHIT
T303_05865	CRISPR-associated protein Csm1	K07016	csm1, cas10	CRISPR-associated protein Csm1	COG1353	V	Defense mechanisms	PTHR36528:SF1
T303_05870	CRISPR-associated protein Csm2	K19138	csm2	CRISPR-associated protein Csm2	COG1421	V	Defense mechanisms	NOHIT
T303_05875	CRISPR-associated protein Cmr4	K09002	csm3	CRISPR-associated protein Csm3	COG1337	V	Defense mechanisms	PTHR35579
T303_05880	CRISPR-associated protein Csm4	K19139	csm4	CRISPR-associated protein Csm4	COG1567	V	Defense mechanisms	NOHIT
T303_05885	CRISPR-associated protein Csm5	K19140	csm5	CRISPR-associated protein Csm5	COG1332	V	Defense mechanisms	PTHR38007:SF1
T303_05895	orotidine 5'-phosphate decarboxylase	K01591	pyrF	orotidine-5'-phosphate decarboxylase [EC:4.1.1.23]	COG0284	F	Nucleotide transport and metabolism	PTHR32119:SF2
T303_05900	orotate phosphoribosyltransferase	K00762	pyrE	orotate phosphoribosyltransferase [EC:2.4.2.10]	COG0461	F	Nucleotide transport and metabolism	PTHR19278:SF9
T303_05905	hypothetical protein	not assigned	not assigned	not assigned	not assigned	not assigned	not assigned	NOHIT
T303_05910	hypothetical protein	not assigned	not assigned	not assigned	not assigned	not assigned	not assigned	NOHIT
T303_05915	peptide ABC transporter permease	K03305	TC.POT	proton-dependent oligopeptide transporter, POT family	COG3104	E	Amino acid transport and metabolism	PTHR11654:SF119
T303_05925	hypothetical protein	not assigned	not assigned	not assigned	not assigned	not assigned	not assigned	NOHIT
T303_05930	hypothetical protein	not assigned	not assigned	not assigned	not assigned	not assigned	not assigned	NOHIT
T303_05935	5'-nucleotidase	not assigned	not assigned	not assigned	COG0737	F,V	Nucleotide transport and metabolism	PTHR11575
T303_05940	hypothetical protein	not assigned	not assigned	not assigned	not assigned	not assigned	not assigned	NOHIT
T303_05945	AraC family transcriptional regulator	not assigned	not assigned	not assigned	COG2207	K	Transcription	PTHR43280:SF2
T303_05950	AraC family transcriptional regulator	not assigned	not assigned	not assigned	not assigned	not assigned	not assigned	NOHIT
T303_05955	tRNA modification GTPase	K03650	mnmE, trmE, MSS1	tRNA modification GTPase [EC:3.6.-.-]	COG0486	J	Translation, ribosomal structure and biogenesis	PTHR42714:SF2
T303_05960	sodium:alanine symporter	K03310	TC.AGCS	alanine or glycine:cation symporter, AGCS family	COG1115	E	Amino acid transport and metabolism	PTHR30330:SF3
T303_05965	ATP-dependent DNA helicase PcrA	K03657	uvrD, pcrA	DNA helicase II / ATP-dependent DNA helicase PcrA [EC:3.6.4.12]	COG0210	L	Replication, recombination and repair	PTHR11070:SF7
T303_05970	O-acetylhomoserine (thiol)-lyase	K01740	metY	O-acetylhomoserine (thiol)-lyase [EC:2.5.1.49]	COG2873	E	Amino acid transport and metabolism	PTHR43797
T303_05975	haloacid dehalogenase	not assigned	not assigned	not assigned	not assigned	not assigned	not assigned	PTHR10000
T303_05980	hypothetical protein	not assigned	not assigned	not assigned	not assigned	not assigned	not assigned	NOHIT
T303_05985	lipid hydroperoxide peroxidase	K11065	tpx	thiol peroxidase, atypical 2-Cys peroxiredoxin [EC:1.11.1.15]	COG2077	O	Posttranslational modification, protein turnover, chaperones	PTHR43110:SF1
T303_05990	type I restriction endonuclease subunit S	not assigned	not assigned	not assigned	not assigned	not assigned	not assigned	PTHR43140:SF1
T303_06000	tRNA pseudouridine synthase B	K03177	truB, PUS4, TRUB1	tRNA pseudouridine55 synthase [EC:5.4.99.25]	COG0130	J	Translation, ribosomal structure and biogenesis	PTHR13767:SF2
T303_06005	riboflavin biosynthesis protein RibF	K11753	ribF	riboflavin kinase / FMN adenylyltransferase [EC:2.7.1.26 2.7.7.2]	COG0196	H	Coenzyme transport and metabolism	PTHR22749:SF6
T303_06010	ArsR family transcriptional regulator	K16509	spxA	regulatory protein spx	COG1393	P	Inorganic ion transport and metabolism	PTHR30041:SF4
T303_06015	hypothetical protein	not assigned	not assigned	not assigned	COG4476	S	Function unknown	NOHIT
T303_06020	inositol monophosphatase	K01092	E3.1.3.25, IMPA, suhB	myo-inositol-1(or 4)-monophosphatase [EC:3.1.3.25]	COG0483	G	Carbohydrate transport and metabolism	PTHR20854:SF4
T303_06025	23S rRNA methyltransferase	not assigned	not assigned	not assigned	COG0144	J	Translation, ribosomal structure and biogenesis	PTHR22807:SF30
T303_06030	phosphate-binding protein	K02040	pstS	phosphate transport system substrate-binding protein	COG0226	P	Inorganic ion transport and metabolism	PTHR30570:SF4
T303_06035	phosphate ABC transporter permease	K02037	pstC	phosphate transport system permease protein	COG0573	P	Inorganic ion transport and metabolism	PTHR30425:SF2
T303_06040	phosphate ABC transporter permease	K02038	pstA	phosphate transport system permease protein	COG0581	P	Inorganic ion transport and metabolism	PTHR43470:SF4
T303_06045	phosphate ABC transporter ATP-binding protein	K02036	pstB	phosphate transport system ATP-binding protein [EC:7.3.2.1]	COG1117	P	Inorganic ion transport and metabolism	PTHR43423:SF4
T303_06050	phosphate ABC transporter ATP-binding protein	K02036	pstB	phosphate transport system ATP-binding protein [EC:7.3.2.1]	COG1117	P	Inorganic ion transport and metabolism	PTHR43423:SF4
T303_06055	PhoU family transcriptional regulator	K02039	phoU	phosphate transport system protein	COG0704	P	Inorganic ion transport and metabolism	PTHR42930:SF3
T303_06060	aminopeptidase N	K01256	pepN	aminopeptidase N [EC:3.4.11.2]	COG0308	E	Amino acid transport and metabolism	PTHR11533:SF174
T303_06065	tyrosine recombinase XerS	not assigned	not assigned	not assigned	COG4974	L	Replication, recombination and repair	PTHR30349:SF59
T303_06070	lipoate-protein ligase A	K03800	lplA, lplJ	lipoate---protein ligase [EC:6.3.1.20]	COG0095	H	Coenzyme transport and metabolism	PTHR12561:SF3
T303_06080	maltodextrin phosphorylase	K00688	PYG, glgP	glycogen phosphorylase [EC:2.4.1.1]	COG0058	G	Carbohydrate transport and metabolism	PTHR11468:SF3
T303_06085	4-alpha-glucanotransferase	K00705	malQ	4-alpha-gluca notransferase [EC:2.4.1.25]	COG1640	G	Carbohydrate transport and metabolism	PTHR32438:SF5
T303_06090	LacI family transcription regulator	K02529	lacI, galR	LacI family transcriptional regulator	not assigned	not assigned	not assigned	PTHR30146:SF103
T303_06095	hypothetical protein	not assigned	not assigned	not assigned	not assigned	not assigned	not assigned	NOHIT
T303_06100	preprotein translocase subunit TatA	K03116	tatA	sec-independent protein translocase protein TatA	not assigned	not assigned	not assigned	PTHR33162:SF9
T303_06105	preprotein translocase subunit TatC	K03118	tatC	sec-independent protein translocase protein TatC	COG0805	U	Intracellular trafficking, secretion, and vesicular transport	PTHR30371:SF4
T303_06110	OFeT family oxidase-dependent iron (Fe2+) transporter	K07243	FTR, FTH1, efeU	high-affinity iron transporter	COG0672	P	Inorganic ion transport and metabolism	PTHR31632:SF4
T303_06115	peroxidase	K16301	efeB	deferrochelatase/peroxidase EfeB [EC:1.11.1.-]	COG2837	P	Inorganic ion transport and metabolism	PTHR30521:SF4
T303_06120	iron ABC transporter substrate-binding protein	K07224	efeO	iron uptake system component EfeO	COG2822	P	Inorganic ion transport and metabolism	PTHR39192:SF1
T303_06125	ferrichrome ABC transporter substrate-binding protein	K02016	ABC.FEV.S	iron complex transport system substrate-binding protein	COG4607	P	Inorganic ion transport and metabolism	PTHR30532:SF4
T303_06130	iron ABC transporter ATP-binding protein	K02013	ABC.FEV.A	iron complex transport system ATP-binding protein [EC:3.6.3.34]	COG4604	P	Inorganic ion transport and metabolism	PTHR42771:SF3
T303_06135	ferrichrome ABC transporter permease	K02015	ABC.FEV.P	iron complex transport system permease protein	COG4605	P	Inorganic ion transport and metabolism	PTHR30472:SF19
T303_06140	ferrichrome ABC transporter permease	K02015	ABC.FEV.P	iron complex transport system permease protein	COG4606	P	Inorganic ion transport and metabolism	PTHR30472:SF27
T303_06145	alkaline amylopullulanase	not assigned	not assigned	not assigned	not assigned	not assigned	not assigned	NOHIT
T303_06150	alkaline amylopullulanase	not assigned	not assigned	not assigned	not assigned	not assigned	not assigned	PTHR43002:SF3
T303_06155	hypothetical protein	not assigned	not assigned	not assigned	not assigned	not assigned	not assigned	PTHR43002:SF3
T303_06160	hypothetical protein	not assigned	not assigned	not assigned	not assigned	not assigned	not assigned	PTHR43002:SF3
T303_06170	hypothetical protein	not assigned	not assigned	not assigned	not assigned	not assigned	not assigned	PTHR34135:SF2
T303_06175	hypothetical protein	not assigned	not assigned	not assigned	not assigned	not assigned	not assigned	NOHIT
T303_06180	dihydrolipoyl dehydrogenase	K00382	DLD, lpd, pdhD	dihydrolipoamide dehydrogenase [EC:1.8.1.4]	COG1249	C	Energy production and conversion	PTHR22912:SF195
T303_06185	branched-chain alpha-keto acid dehydrogenase subunit E2	K00627	DLAT, aceF, pdhC	pyruvate dehydrogenase E2 component (dihydrolipoamide acetyltransferase) [EC:2.3.1.12]	COG0508	C	Energy production and conversion	PTHR23151:SF84
T303_06190	TPP-dependent acetoin dehydrogenase complex, E1 protein subunit beta	K00162	PDHB, pdhB	pyruvate dehydrogenase E1 component beta subunit [EC:1.2.4.1]	COG0022	C	Energy production and conversion	PTHR43257:SF4
T303_06195	pyruvate dehydrogenase E1 subunit alpha	K00161	PDHA, pdhA	pyruvate dehydrogenase E1 component alpha subunit [EC:1.2.4.1]	COG1071	C	Energy production and conversion	PTHR11516
T303_06200	hypothetical protein	not assigned	not assigned	not assigned	not assigned	not assigned	not assigned	NOHIT
T303_06205	hypothetical protein	not assigned	not assigned	not assigned	not assigned	not assigned	not assigned	NOHIT
T303_06215	3'-5' exonuclease	K09951	cas2	CRISPR-associated protein Cas2	not assigned	not assigned	not assigned	PTHR30231
T303_06220	CRISPR-associated protein Cse1	K15342	cas1	CRISP-associated protein Cas1	COG1518	V	Defense mechanisms	PTHR34353:SF3
T303_06225	CRISPR-associated protein CasE	K19126	casE, cse3	CRISPR system Cascade subunit CasE	not assigned	not assigned	not assigned	NOHIT
T303_06230	CRISPR-associated protein Cas5	K19125	casD, cse5	CRISPR system Cascade subunit CasD	not assigned	not assigned	not assigned	NOHIT
T303_06235	CRISPR-associated protein CasC	K19124	casC, cse4	CRISPR system Cascade subunit CasC	not assigned	not assigned	not assigned	NOHIT
T303_06240	CRISPR-associated protein CasB	K19046	casB, cse2	CRISPR system Cascade subunit CasB	not assigned	not assigned	not assigned	NOHIT
T303_06250	helicase	K07012	cas3	CRISPR-associated endonuclease/helicase Cas3 [EC:3.1.-.- 3.6.4.-]	not assigned	not assigned	not assigned	PTHR24031:SF574
T303_06255	hypothetical protein	not assigned	not assigned	not assigned	not assigned	not assigned	not assigned	NOHIT
T303_06260	hypothetical protein	not assigned	not assigned	not assigned	COG4907	S	Function unknown	NOHIT
T303_06265	dihydroorotase	K01465	URA4, pyrC	dihydroorotase [EC:3.5.2.3]	COG0044	F	Nucleotide transport and metabolism	PTHR43668:SF1
T303_06270	uracil-DNA glycosylase	K03648	UNG, UDG	uracil-DNA glycosylase [EC:3.2.2.27]	COG0692	L	Replication, recombination and repair	PTHR11264
T303_06275	cation transporter	not assigned	not assigned	not assigned	COG0053	P	Inorganic ion transport and metabolism	PTHR43840:SF9
T303_06285	serine protease	not assigned	not assigned	not assigned	COG4667	I	Lipid transport and metabolism	PTHR14226:SF25
T303_06290	lysophospholipase	not assigned	not assigned	not assigned	not assigned	not assigned	not assigned	PTHR11852:SF0
T303_06295	lipase	not assigned	not assigned	not assigned	not assigned	not assigned	not assigned	NOHIT
T303_06300	protein kinase	K03688	ubiB, aarF	ubiquinone biosynthesis protein	COG0661	H,T	Coenzyme transport and metabolism	PTHR10566:SF113
T303_06305	hypothetical protein	not assigned	not assigned	not assigned	COG3937	T,Q	Signal transduction mechanisms	PTHR38664:SF1
T303_06315	epsP	not assigned	not assigned	not assigned	COG0628	R	General function prediction only	PTHR21716:SF41
T303_06320	epsO	K15634	gpmB	probable phosphoglycerate mutase [EC:5.4.2.12]	COG0406	G	Carbohydrate transport and metabolism	PTHR23029
T303_06325	unknown	not assigned	not assigned	not assigned	not assigned	not assigned	not assigned	NOHIT
T303_06326	unknown	not assigned	not assigned	not assigned	not assigned	not assigned	not assigned	NOHIT
T303_06327	unknown	not assigned	not assigned	not assigned	not assigned	not assigned	not assigned	NOHIT
T303_06330	orf14.9	not assigned	not assigned	not assigned	not assigned	not assigned	not assigned	PTHR36834
T303_06336	UDP-galactopyranose mutase	K01854	glf	UDP-galactopyranose mutase [EC:5.4.99.9]	COG0562	M	Cell wall/membrane/envelope biogenesis	NOHIT
T303_06345	unknown	not assigned	not assigned	not assigned	not assigned	not assigned	not assigned	NOHIT
T303_06350	epsL	not assigned	not assigned	not assigned	COG2244	M	Cell wall/membrane/envelope biogenesis	PTHR43424:SF1
T303_06355	epsK	not assigned	not assigned	not assigned	COG0463	M	Cell wall/membrane/envelope biogenesis	PTHR22916:SF51
T303_06360	eps2D	not assigned	not assigned	not assigned	not assigned	not assigned	not assigned	PTHR32309
T303_06365	eps2C	not assigned	not assigned	not assigned	not assigned	not assigned	not assigned	NOHIT
T303_06370	epsJ	not assigned	not assigned	not assigned	COG0463	M	Cell wall/membrane/envelope biogenesis	PTHR22916:SF47
T303_06375	epsI	not assigned	not assigned	not assigned	not assigned	not assigned	not assigned	NOHIT
T303_06380	epsH	not assigned	not assigned	not assigned	not assigned	not assigned	not assigned	NOHIT
T303_06385	epsG	not assigned	not assigned	not assigned	not assigned	not assigned	not assigned	NOHIT
T303_06395	epsF	not assigned	not assigned	not assigned	not assigned	not assigned	not assigned	NOHIT
T303_06400	epsE	not assigned	not assigned	not assigned	COG2148	M	Cell wall/membrane/envelope biogenesis	PTHR30576:SF10
T303_06405	not assigned	not assigned	not assigned	not assigned	COG0489	D	Cell cycle control, cell division, chromosome partitioning	NOHIT
T303_06410	eps1C	not assigned	not assigned	not assigned	COG3944	M	Cell wall/membrane/envelope biogenesis	PTHR32309
T303_06415	epsB	K01104	E3.1.3.48	protein-tyrosine phosphatase [EC:3.1.3.48]	COG4464	T	Signal transduction mechanisms	PTHR39181:SF1
T303_06420	epsA	not assigned	not assigned	not assigned	COG1316	M	Cell wall/membrane/envelope biogenesis	PTHR33392
T303_06430	purine nucleoside phosphorylase	K03784	deoD	purine-nucleoside phosphorylase [EC:2.4.2.1]	COG0813	F	Nucleotide transport and metabolism	PTHR43691:SF2
T303_06445	purine nucleoside phosphorylase	K03783	punA, PNP	purine-nucleoside phosphorylase [EC:2.4.2.1]	COG0005	F	Nucleotide transport and metabolism	PTHR11904:SF9
T303_06455	phosphopentomutase	K01839	deoB	phosphopentomutase [EC:5.4.2.7]	COG1015	G	Carbohydrate transport and metabolism	PTHR21110:SF0
T303_06460	ribose 5-phosphate isomerase	K01807	rpiA	ribose 5-phosphate isomerase A [EC:5.3.1.6]	COG0120	G	Carbohydrate transport and metabolism	PTHR43748:SF3
T303_06465	hypothetical protein	not assigned	not assigned	not assigned	not assigned	not assigned	not assigned	NOHIT
T303_06470	hypothetical protein	not assigned	not assigned	not assigned	not assigned	not assigned	not assigned	NOHIT
T303_06480	uracil-DNA glycosylase	not assigned	not assigned	not assigned	COG1573	L	Replication, recombination and repair	PTHR42160:SF1
T303_06485	dipeptidase PepV	not assigned	not assigned	not assigned	COG0624	E	Amino acid transport and metabolism	PTHR43808:SF3
T303_06490	4-oxalocrotonate tautomerase	K01821	praC, xylH	4-oxalocrotonate tautomerase [EC:5.3.2.6]	COG1942	Q	Secondary metabolites biosynthesis, transport and catabolism	PTHR35530:SF1
T303_06495	GNAT family acetyltransferase	not assigned	not assigned	not assigned	not assigned	not assigned	not assigned	PTHR42919
T303_06505	50S ribosomal protein L20	K02887	RP-L20, MRPL20, rplT	large subunit ribosomal protein L20	COG0292	J	Translation, ribosomal structure and biogenesis	PTHR10986:SF12
T303_06510	50S ribosomal protein L35	K02916	RP-L35, MRPL35, rpmI	large subunit ribosomal protein L35	COG0291	J	Translation, ribosomal structure and biogenesis	PTHR33343:SF1
T303_06515	translation initiation factor IF-3	K02520	infC, MTIF3	translation initiation factor IF-3	COG0290	J	Translation, ribosomal structure and biogenesis	PTHR10938
T303_06520	cytidylate kinase	K00945	cmk	CMP/dCMP kinase [EC:2.7.4.25]	COG0283	F	Nucleotide transport and metabolism	PTHR21299:SF2
T303_06525	peptidoglycan-binding protein LysM	not assigned	not assigned	not assigned	not assigned	not assigned	not assigned	PTHR13468:SF1
T303_06530	ferredoxin	K05337	fer	ferredoxin	COG1141	C	Energy production and conversion	PTHR39163:SF1
T303_06535	pore forming protein	not assigned	not assigned	not assigned	not assigned	not assigned	not assigned	NOHIT
T303_06540	peptidase T	K01258	pepT	tripeptide aminopeptidase [EC:3.4.11.4]	COG2195	E	Amino acid transport and metabolism	PTHR42994:SF1
T303_06545	hypothetical protein	not assigned	not assigned	not assigned	not assigned	not assigned	not assigned	NOHIT
T303_06550	signal peptidase	K03100	lepB	signal peptidase I [EC:3.4.21.89]	not assigned	not assigned	not assigned	PTHR43390
T303_06555	hypothetical protein	not assigned	not assigned	not assigned	COG3063	N,W	Cell motility	PTHR45586:SF3
T303_06560	membrane protein	not assigned	not assigned	not assigned	COG0628	R	General function prediction only	PTHR21716:SF39
T303_06565	DNA mismatch repair protein MutT	K03574	mutT, NUDT15, MTH2	8-oxo-dGTP diphosphatase [EC:3.6.1.55]	COG1051	F	Nucleotide transport and metabolism	PTHR42904:SF3
T303_06570	cell division protein FtsX	K09811	ftsX	cell division transport system permease protein	COG2177	D	Cell cycle control, cell division, chromosome partitioning	PTHR47755:SF1
T303_06575	cell division protein FtsE	K09812	ftsE	cell division transport system ATP-binding protein	COG2884	D	Cell cycle control, cell division, chromosome partitioning	PTHR24220:SF470
T303_06580	peptide chain release factor 2	K02836	prfB	peptide chain release factor 2	COG1186	J	Translation, ribosomal structure and biogenesis	PTHR43116:SF3
T303_06585	iron-sulfur cluster-binding protein	K18979	queG	epoxyqueuosine reductase [EC:1.17.99.6]	COG1600	J	Translation, ribosomal structure and biogenesis	PTHR30002:SF4
T303_06590	phosphoesterase	not assigned	not assigned	not assigned	not assigned	not assigned	not assigned	PTHR31302:SF0
T303_06595	NADPH-flavin oxidoreductase	not assigned	not assigned	not assigned	COG0778	C	Energy production and conversion	PTHR43425
T303_06600	ATPase	K01537	E3.6.3.8	Ca2+-transporting ATPase [EC:3.6.3.8]	COG0474	P	Inorganic ion transport and metabolism	PTHR42861:SF49
T303_06605	50S ribosomal protein L19	not assigned	not assigned	not assigned	not assigned	not assigned	not assigned	NOHIT
T303_06610	acetyltransferase	not assigned	not assigned	not assigned	not assigned	not assigned	not assigned	PTHR43420:SF16
T303_06615	hypothetical protein	not assigned	not assigned	not assigned	not assigned	not assigned	not assigned	NOHIT
T303_06620	sugar phosphate phosphatase	not assigned	not assigned	not assigned	COG0561	R,H	General function prediction only	PTHR10000:SF49
T303_06625	UDP-N-acetylmuramoylpentapeptide-lysine N(6)-alanyltransferase	K05363	murM	serine/alanine adding enzyme [EC:2.3.2.10]	COG2348	M	Cell wall/membrane/envelope biogenesis	PTHR36174:SF1
T303_06635	metallo-hydrolase	not assigned	not assigned	not assigned	COG1235	P	Inorganic ion transport and metabolism	PTHR47619:SF1
T303_06640	sensor kinase	K07652	vicK	two-component system, OmpR family, sensor histidine kinase VicK [EC:2.7.13.3]	COG5002	T	Signal transduction mechanisms	PTHR45453:SF1
T303_06645	PhoP family transcriptional regulator	K07668	vicR	two-component system, OmpR family, response regulator VicR	COG0745	T,K	Signal transduction mechanisms	PTHR26402:SF726
T303_06650	arginine ABC transporter ATP-binding protein	K10041	ABC.GLN1.A	putative glutamine transport system ATP-binding protein [EC:3.6.3.-]	COG1126	E	Amino acid transport and metabolism	PTHR43166:SF4
T303_06655	glutamine ABC transporter substrate-binding protein	K10039	ABC.GLN1.S	putative glutamine transport system substrate-binding protein	COG0834	E,T	Amino acid transport and metabolism	PTHR35936:SF9
T303_06660	glutamine ABC transporter permease	K10040	ABC.GLN1.P	putative glutamine transport system permease protein	COG0765	E	Amino acid transport and metabolism	PTHR30614:SF40
T303_06665	glutamine ABC transporter permease	K10040	ABC.GLN1.P	putative glutamine transport system permease protein	COG0765	E	Amino acid transport and metabolism	PTHR30614:SF39
T303_06670	DNA-entry nuclease	K15051	endA	DNA-entry nuclease	not assigned	not assigned	not assigned	NOHIT
T303_06675	DNA-directed RNA polymerase subunit beta	not assigned	not assigned	not assigned	not assigned	not assigned	not assigned	NOHIT
T303_06680	UDP-N-acetylglucosamine 1-carboxyvinyltransferase	K00790	murA	UDP-N-acetylglucosamine 1-carboxyvinyltransferase [EC:2.5.1.7]	COG0766	M	Cell wall/membrane/envelope biogenesis	PTHR43783
T303_06685	membrane protein	not assigned	not assigned	not assigned	COG4836	S	Function unknown	NOHIT
T303_06690	UDP-galactose-4-epimerase	K01784	galE, GALE	UDP-glucose 4-epimerase [EC:5.1.3.2]	COG1087	M	Cell wall/membrane/envelope biogenesis	PTHR43725:SF14
T303_06695	hypothetical protein	not assigned	not assigned	not assigned	not assigned	not assigned	not assigned	NOHIT
T303_06700	S-adenosylmethionine synthetase	K00789	metK	S-adenosylmethionine synthetase [EC:2.5.1.6]	COG0192	H	Coenzyme transport and metabolism	PTHR11964:SF1
T303_06705	GntR family transcriptional regulator	K03524	birA	BirA family transcriptional regulator, biotin operon repressor / biotin---[acetyl-CoA-carboxylase] ligase [EC:6.3.4.15]	COG0340	H	Coenzyme transport and metabolism	PTHR12835:SF5
T303_06710	hypothetical protein	not assigned	not assigned	not assigned	not assigned	not assigned	not assigned	NOHIT
T303_06715	DNA polymerase III subunit gamma/tau	K02343	dnaX	DNA polymerase III subunit gamma/tau [EC:2.7.7.7]	COG2812	L	Replication, recombination and repair	PTHR11669:SF0
T303_06720	30S ribosomal protein S1	K08968	msrC	L-methionine (R)-S-oxide reductase [EC:1.8.4.14]	COG1956	V,T	Defense mechanisms	PTHR21021:SF15
T303_06725	tRNA delta(2)-isopentenylpyrophosphate transferase	K00791	miaA, TRIT1	tRNA dimethylallyltransferase [EC:2.5.1.75]	COG0324	J	Translation, ribosomal structure and biogenesis	PTHR11088:SF25
T303_06730	hypothetical protein	not assigned	not assigned	not assigned	not assigned	not assigned	not assigned	NOHIT
T303_06735	hypothetical protein	not assigned	not assigned	not assigned	not assigned	not assigned	not assigned	NOHIT
T303_06740	tRNA Arg	K14219	tRNA-Arg	tRNA Arg	not assigned	not assigned	not assigned	NOHIT
T303_06745	50S ribosomal protein L19	K02884	RP-L19, MRPL19, rplS	large subunit ribosomal protein L19	COG0335	J	Translation, ribosomal structure and biogenesis	PTHR15680
T303_06750	voltage-gated chloride channel protein	not assigned	not assigned	not assigned	COG0038	P	Inorganic ion transport and metabolism	PTHR43427:SF5
T303_06755	chorismate mutase	K04516	AROA1, aroA	chorismate mutase [EC:5.4.99.5]	COG1605	E	Amino acid transport and metabolism	PTHR38041:SF1
T303_06760	ribonuclease HII	not assigned	not assigned	not assigned	COG0038	P	Inorganic ion transport and metabolism	PTHR45711:SF5
T303_06765	flavodoxin	not assigned	not assigned	not assigned	COG0716	C	Energy production and conversion	PTHR42809:SF1
T303_06775	Zn-dependent protease	not assigned	not assigned	not assigned	COG5549	O	Posttranslational modification, protein turnover, chaperones	PTHR10201
T303_06780	acetyl esterase	K03930	estA	putative tributyrin esterase [EC:3.1.1.-]	COG0627	V	Defense mechanisms	PTHR42797:SF2
T303_06785	ribonuclease J	K12574	rnj	ribonuclease J [EC:3.1.-.-]	COG0595	J	Translation, ribosomal structure and biogenesis	PTHR43694:SF4
T303_06790	phosphonate ABC transporter ATP-binding protein	K05833	ABC.X4.A	putative ABC transport system ATP-binding protein	COG1101	R	General function prediction only	PTHR42788:SF12
T303_06795	branched-chain amino acid ABC transporter permease	K05832	ABC.X4.P	putative ABC transport system permease protein	COG4120	R	General function prediction only	PTHR32196
T303_06800	peptide ABC transporter substrate-binding protein	K01989	ABC.X4.S	putative ABC transport system substrate-binding protein	COG2984	R	General function prediction only	PTHR35271:SF1
T303_06805	hypothetical protein	not assigned	not assigned	not assigned	not assigned	not assigned	not assigned	NOHIT
T303_06810	hypothetical protein	not assigned	not assigned	not assigned	not assigned	not assigned	not assigned	NOHIT
T303_06815	hypothetical protein	not assigned	not assigned	not assigned	not assigned	not assigned	not assigned	NOHIT
T303_06820	hypothetical protein	not assigned	not assigned	not assigned	not assigned	not assigned	not assigned	NOHIT
T303_06825	hypothetical protein	not assigned	not assigned	not assigned	not assigned	not assigned	not assigned	NOHIT
T303_06830	hypothetical protein	not assigned	not assigned	not assigned	not assigned	not assigned	not assigned	NOHIT
T303_06835	transposase IS1193	not assigned	not assigned	not assigned	COG3464	X	Mobilome - prophages, transposons	PTHR33498:SF1
T303_06840	pyruvate kinase	K00873	PK, pyk	pyruvate kinase [EC:2.7.1.40]	COG0469	G	Carbohydrate transport and metabolism	PTHR11817:SF3
T303_06845	6-phosphofructokinase	K00850	pfkA, PFK	6-phosphofructokinase 1 [EC:2.7.1.11]	COG0205	G	Carbohydrate transport and metabolism	PTHR13697:SF4
T303_06850	DNA polymerase III subunit alpha	K02337	dnaE	DNA polymerase III subunit alpha [EC:2.7.7.7]	COG0587	L	Replication, recombination and repair	PTHR32294
T303_06855	translation factor (SUA5)	not assigned	not assigned	not assigned	COG0009	J	Translation, ribosomal structure and biogenesis	PTHR17490
T303_06860	isopropylmalate isomerase	K01704	leuD, IPMI-S	3-isopropylmalate/(R)-2-methylmalate dehydratase small subunit [EC:4.2.1.33 4.2.1.35]	COG0066	E	Amino acid transport and metabolism	PTHR43345:SF5
T303_06865	isopropylmalate isomerase	K01703	leuC, IPMI-L	3-isopropylmalate/(R)-2-methylmalate dehydratase large subunit [EC:4.2.1.33 4.2.1.35]	COG0065	E	Amino acid transport and metabolism	PTHR43822:SF9
T303_06870	membrane protein	not assigned	not assigned	not assigned	COG3326	S	Function unknown	PTHR12962:SF1
T303_06875	3-isopropylmalate dehydrogenase	K00052	leuB, IMDH	3-isopropylmalate dehydrogenase [EC:1.1.1.85]	COG0473	E,C	Amino acid transport and metabolism	PTHR42979:SF1
T303_06880	2-isopropylmalate synthase	K01649	leuA, IMS	2-isopropylmalate synthase [EC:2.3.3.13]	COG0119	E	Amino acid transport and metabolism	PTHR10277:SF9
T303_06885	phosphoglycerate mutase	K01834	PGAM, gpmA	2,3-bisphosphoglycerate-dependent phosphoglycerate mutase [EC:5.4.2.11]	COG0588	G	Carbohydrate transport and metabolism	PTHR11931
T303_06890	dihydroorotate dehydrogenase	K00226	pyrD	dihydroorotate dehydrogenase (fumarate) [EC:1.3.98.1]	COG0167	F	Nucleotide transport and metabolism	PTHR43843
T303_06895	hypothetical protein	not assigned	not assigned	not assigned	not assigned	not assigned	not assigned	NOHIT
T303_06900	transcriptional regulator	K03530	hupB	DNA-binding protein HU-beta	COG0776	L	Replication, recombination and repair	PTHR33175:SF3
T303_06905	membrane protein	not assigned	not assigned	not assigned	COG4698	S	Function unknown	NOHIT
T303_06910	GDSL family lipase	not assigned	not assigned	not assigned	COG2755	E	Amino acid transport and metabolism	PTHR30383
T303_06915	hypothetical protein	not assigned	not assigned	not assigned	COG1307	I	Lipid transport and metabolism	PTHR33434:SF6
T303_06920	DNA repair protein RecN	K03631	recN	DNA repair protein RecN (Recombination protein N)	COG0497	L	Replication, recombination and repair	PTHR11059:SF0
T303_06925	ArgR family transcriptional regulator	K03402	argR, ahrC	transcriptional regulator of arginine metabolism	COG1438	K	Transcription	PTHR34471:SF1
T303_06930	cell division protein FtsJ	K06442	tlyA	23S rRNA (cytidine1920-2'-O)/16S rRNA (cytidine1409-2'-O)-methyltransferase [EC:2.1.1.226 2.1.1.227]	COG1189	J	Translation, ribosomal structure and biogenesis	PTHR32319:SF0
T303_06935	geranyltranstransferase	K13789	GGPS	geranylgeranyl diphosphate synthase, type II [EC:2.5.1.1 2.5.1.10 2.5.1.29]	COG0142	H	Coenzyme transport and metabolism	PTHR43281:SF1
T303_06940	exodeoxyribonuclease VII small subunit	K03602	xseB	exodeoxyribonuclease VII small subunit [EC:3.1.11.6]	COG1722	L	Replication, recombination and repair	PTHR34137:SF1
T303_06945	exodeoxyribonuclease VII large subunit	K03601	xseA	exodeoxyribonuclease VII large subunit [EC:3.1.11.6]	COG1570	L	Replication, recombination and repair	PTHR30008:SF0
T303_06950	hypothetical protein	not assigned	not assigned	not assigned	not assigned	not assigned	not assigned	NOHIT
T303_06955	hypothetical protein	not assigned	not assigned	not assigned	not assigned	not assigned	not assigned	NOHIT
T303_06960	hypothetical protein	not assigned	not assigned	not assigned	not assigned	not assigned	not assigned	NOHIT
T303_06965	endonuclease III	K10773	NTH	endonuclease III [EC:4.2.99.18]	COG0177	L	Replication, recombination and repair	PTHR10359:SF18
T303_06970	DNA replication protein DnaD	K02086	dnaD	DNA replication protein	COG3935	L	Replication, recombination and repair	PTHR37293:SF6
T303_06975	homoserine O-succinyltransferase	K00651	metA	homoserine O-succinyltransferase/O-acetyltransferase [EC:2.3.1.46 2.3.1.31]	COG1897	E	Amino acid transport and metabolism	PTHR20919:SF0
T303_06980	adenine phosphoribosyltransferase	K00759	APRT, apt	adenine phosphoribosyltransferase [EC:2.4.2.7]	COG0503	F	Nucleotide transport and metabolism	PTHR32315:SF3
T303_06985	single-stranded DNA exonuclease	K07462	recJ	single-stranded-DNA-specific exonuclease [EC:3.1.-.-]	COG0608	L	Replication, recombination and repair	PTHR30255:SF2
T303_06990	short-chain dehydrogenase	K07124	K07124	uncharacterized protein	COG0300	R	General function prediction only	PTHR44196:SF3
T303_06995	ribonuclease Z	K00784	rnz	ribonuclease Z [EC:3.1.26.11]	COG1234	J	Translation, ribosomal structure and biogenesis	PTHR46018:SF2
T303_07000	cystathionine beta-lyase	not assigned	not assigned	not assigned	not assigned	not assigned	not assigned	NOHIT
T303_07005	GTP-binding protein HflX	K03665	hflX	GTPase	COG2262	J	Translation, ribosomal structure and biogenesis	PTHR10229
T303_07010	transposase IS1198	not assigned	not assigned	not assigned	COG3039	X	Mobilome - prophages, transposons	PTHR35604
T303_07015	cell division protein	K05837	rodA, mrdB	rod shape determining protein RodA	COG0772	D	Cell cycle control, cell division, chromosome partitioning	PTHR30474:SF1
T303_07020	phosphoribosyl-ATP pyrophosphatase	K01523	hisE	phosphoribosyl-ATP pyrophosphohydrolase [EC:3.6.1.31]	COG0140	E	Amino acid transport and metabolism	PTHR42945:SF1
T303_07025	phosphoribosyl-AMP cyclohydrolase	K01496	hisI	phosphoribosyl-AMP cyclohydrolase [EC:3.5.4.19]	COG0139	E	Amino acid transport and metabolism	PTHR42945:SF3
T303_07030	imidazole glycerol phosphate synthase	K02500	hisF	imidazole glycerol-phosphate synthase subunit HisF [EC:4.3.2.10]	COG0107	E	Amino acid transport and metabolism	PTHR21235:SF2
T303_07035	1-(5-phosphoribosyl)-5-[(5-phosphoribosylamino)methylideneamino] imidazole-4-carboxamide isomerase	K01814	hisA	phosphoribosylformimino-5-aminoimidazole carboxamide ribotide isomerase [EC:5.3.1.16]	COG0106	E	Amino acid transport and metabolism	PTHR43090
T303_07040	imidazole glycerol phosphate synthase	K02501	hisH	imidazole glycerol-phosphate synthase subunit HisH [EC:4.3.2.10]	COG0118	E	Amino acid transport and metabolism	PTHR42701:SF1
T303_07045	imidazoleglycerol-phosphate dehydratase	K01693	hisB	imidazoleglycerol-phosphate dehydratase [EC:4.2.1.19]	COG0131	E	Amino acid transport and metabolism	PTHR23133:SF2
T303_07050	histidinol dehydrogenase	K00013	hisD	histidinol dehydrogenase [EC:1.1.1.23]	COG0141	E	Amino acid transport and metabolism	PTHR21256
T303_07055	ATP phosphoribosyltransferase	K00765	hisG	ATP phosphoribosyltransferase [EC:2.4.2.17]	COG0040	E	Amino acid transport and metabolism	PTHR21403:SF4
T303_07060	ATP phosphoribosyltransferase	K02502	hisZ	ATP phosphoribosyltransferase regulatory subunit	COG3705	E	Amino acid transport and metabolism	PTHR43707:SF3
T303_07065	histidinol-phosphate aminotransferase	K00817	hisC	histidinol-phosphate ami notransferase [EC:2.6.1.9]	COG0079	E	Amino acid transport and metabolism	PTHR43643:SF3
T303_07080	transposase IS861	K07497	K07497	putative transposase	not assigned	not assigned	not assigned	PTHR42648:SF3
T303_07090	exopolysaccharide biosynthesis protein	not assigned	not assigned	not assigned	not assigned	not assigned	not assigned	PTHR40446:SF2
T303_07095	exopolysaccharide biosynthesis protein	not assigned	not assigned	not assigned	not assigned	not assigned	not assigned	NOHIT
T303_07100	hypothetical protein	K04486	E3.1.3.15B	histidinol-phosphatase (PHP family) [EC:3.1.3.15]	COG1387	E,R	Amino acid transport and metabolism	PTHR21039:SF0
T303_07105	membrane protein	not assigned	not assigned	not assigned	COG4478	S	Function unknown	NOHIT
T303_07110	HAD family hydrolase	K01101	E3.1.3.41	4-nitrophenyl phosphatase [EC:3.1.3.41]	COG0647	F	Nucleotide transport and metabolism	PTHR19288:SF68
T303_07115	acyl-ACP thioesterase	K01071	MCH	medium-chain acyl-[acyl-carrier-protein] hydrolase [EC:3.1.2.21]	COG3884	I	Lipid transport and metabolism	PTHR31727:SF7
T303_07120	coproporphyrinogen III oxidase	not assigned	not assigned	not assigned	COG0635	H	Coenzyme transport and metabolism	PTHR13932:SF5
T303_07125	hypothetical protein	not assigned	not assigned	not assigned	not assigned	not assigned	not assigned	NOHIT
T303_07130	hypothetical protein	not assigned	not assigned	not assigned	not assigned	not assigned	not assigned	NOHIT
T303_07135	hypothetical protein	not assigned	not assigned	not assigned	not assigned	not assigned	not assigned	NOHIT
T303_07150	transposase IS1193	not assigned	not assigned	not assigned	COG3464	X	Mobilome - prophages, transposons	PTHR33498:SF1
T303_07155	dTDP-glucose 4,6-dehydratase	K01710	E4.2.1.46, rfbB, rffG	dTDP-glucose 4,6-dehydratase [EC:4.2.1.46]	COG1088	M	Cell wall/membrane/envelope biogenesis	PTHR43000:SF16
T303_07160	dTDP-4-keto-L-rhamnose reductase	K01790	rfbC, rmlC	dTDP-4-dehydrorhamnose 3,5-epimerase [EC:5.1.3.13]	COG1898	M	Cell wall/membrane/envelope biogenesis	PTHR21047:SF2
T303_07165	dTDP-glucose pyrophosphorylase	K00973	E2.7.7.24, rfbA, rffH	glucose-1-phosphate thymidylyltransferase [EC:2.7.7.24]	COG1209	M	Cell wall/membrane/envelope biogenesis	PTHR43532
T303_07170	glycine/D-amino acid oxidase (Deaminating)	not assigned	not assigned	not assigned	COG0665	E	Amino acid transport and metabolism	PTHR13847:SF253
T303_07180	hypothetical protein	not assigned	not assigned	not assigned	COG0327	H	Coenzyme transport and metabolism	PTHR13799
T303_07185	SAM-dependent methyltransferase	K06967	trmK	tRNA (adenine22-N1)-methyltransferase [EC:2.1.1.217]	COG2384	J	Translation, ribosomal structure and biogenesis	PTHR38451:SF1
T303_07190	sugar translocase	not assigned	not assigned	not assigned	COG2246	I	Lipid transport and metabolism	PTHR38459:SF3
T303_07195	phosphoglucosamine mutase	K03431	glmM	phosphoglucosamine mutase [EC:5.4.2.10]	COG1109	G	Carbohydrate transport and metabolism	PTHR42946:SF1
T303_07200	hypothetical protein	not assigned	not assigned	not assigned	COG4856	S	Function unknown	PTHR37804:SF1
T303_07205	membrane protein	K18672	dacA	diadenylate cyclase [EC:2.7.7.85]	COG1624	T	Signal transduction mechanisms	PTHR34185:SF1
T303_07210	UDP-N-acetylmuramyl peptide synthase	K01928	murE	UDP-N-acetylmuramoyl-L-alanyl-D-glutamate--2,6-diaminopimelate ligase [EC:6.3.2.13]	COG0769	M	Cell wall/membrane/envelope biogenesis	PTHR23135:SF7
T303_07215	glutamine amidotransferase	K07009	K07009	uncharacterized protein	COG3442	R	General function prediction only	PTHR21343:SF9
T303_07220	lysyl-tRNA synthetase (class II)	K14205	mprF, fmtC	phosphatidylglycerol lysyltransferase [EC:2.3.2.3]	COG2898	S	Function unknown	PTHR34697:SF2
T303_07225	oxidoreductase	not assigned	not assigned	not assigned	COG0596	H,R	Coenzyme transport and metabolism	PTHR43433
T303_07235	multidrug ABC transporter ATP-binding protein	K06158	ABCF3	ATP-binding cassette, subfamily F, member 3	COG0488	R	General function prediction only	PTHR19211:SF95
T303_07240	uridine/cytidine kinase	K00876	udk, UCK	uridine kinase [EC:2.7.1.48]	COG0572	F	Nucleotide transport and metabolism	PTHR10285:SF75
T303_07245	RNA helicase	not assigned	not assigned	not assigned	COG0513	L	Replication, recombination and repair	PTHR24031:SF125
T303_07250	hypothetical protein	not assigned	not assigned	not assigned	not assigned	not assigned	not assigned	NOHIT
T303_07255	glyceraldehyde-3-phosphate dehydrogenase	K00131	gapN	glyceraldehyde-3-phosphate dehydrogenase (NADP+) [EC:1.2.1.9]	COG1012	C	Energy production and conversion	PTHR42991:SF2
T303_07260	transposase IS1193	not assigned	not assigned	not assigned	COG3464	X	Mobilome - prophages, transposons	PTHR33498:SF1
T303_07265	phosphoenolpyruvate-protein phosphotransferase	K08483	PTS-EI.PTSI, ptsI	phosphotransferase system, enzyme I, PtsI [EC:2.7.3.9]	COG1080	G	Carbohydrate transport and metabolism	PTHR46244:SF3
T303_07270	phosphocarrier protein HPr	K11189	PTS-HPR	phosphocarrier protein	COG1925	T,G	Signal transduction mechanisms	PTHR33705:SF4
T303_07275	isocitrate dehydrogenase	K00031	IDH1, IDH2, icd	isocitrate dehydrogenase [EC:1.1.1.42]	COG0538	C	Energy production and conversion	PTHR43504:SF1
T303_07280	citrate synthase	K01647	CS, gltA	citrate synthase [EC:2.3.3.1]	COG0372	C	Energy production and conversion	PTHR11739:SF4
T303_07285	aconitate hydratase	K01681	ACO, acnA	aconitate hydratase [EC:4.2.1.3]	COG1048	C	Energy production and conversion	PTHR11670:SF49
T303_07290	hypothetical protein	not assigned	not assigned	not assigned	not assigned	not assigned	not assigned	NOHIT
T303_07295	glutaredoxin	K06191	nrdH	glutaredoxin-like protein NrdH	COG0695	O	Posttranslational modification, protein turnover, chaperones	PTHR34386:SF3
T303_07300	ribonucleotide-diphosphate reductase subunit alpha	K00525	E1.17.4.1A, nrdA, nrdE	ribonucleoside-diphosphate reductase alpha chain[EC:1.17.4.1]	COG0209	F	Nucleotide transport and metabolism	PTHR11573:SF19
T303_07305	ribonucleoside-diphosphate reductase	K00526	E1.17.4.1B, nrdB, nrdF	ribonucleoside-diphosphate reductase beta chain [EC:1.17.4.1]	COG0208	F	Nucleotide transport and metabolism	PTHR23409:SF18
T303_07325	hypothetical protein	not assigned	not assigned	not assigned	COG4086	S	Function unknown	NOHIT
T303_07335	sortase	K07284	srtA	sortase A [EC:3.4.22.70]	COG3764	M	Cell wall/membrane/envelope biogenesis	NOHIT
T303_07340	DNA gyrase subunit A	K02469	gyrA	DNA gyrase subunit A [EC:5.99.1.3]	COG0188	L	Replication, recombination and repair	PTHR43493
T303_07345	lactate dehydrogenase	K00016	LDH, ldh	L-lactate dehydrogenase [EC:1.1.1.27]	COG0039	C	Energy production and conversion	PTHR43128:SF4
T303_07350	NADH oxidase	not assigned	not assigned	not assigned	COG0446	I	Lipid transport and metabolism	PTHR43429:SF1
T303_07355	heme ABC transporter ATP-binding protein	not assigned	not assigned	not assigned	COG0488	R	General function prediction only	PTHR19211:SF65
T303_07360	membrane protein	not assigned	not assigned	not assigned	COG4720	S	Function unknown	PTHR37815
T303_07370	membrane protein	not assigned	not assigned	not assigned	COG4720	S	Function unknown	PTHR37815:SF6
T303_07375	hypothetical protein	not assigned	not assigned	not assigned	not assigned	not assigned	not assigned	NOHIT
T303_07380	GntR family transcriptional regulator	not assigned	not assigned	not assigned	COG1167	K,E	Transcription	PTHR42790:SF6
T303_07385	ribonucleoside-triphosphate reductase	not assigned	not assigned	not assigned	not assigned	not assigned	not assigned	PTHR21075:SF0
T303_07395	phenylalanyl-tRNA synthase subunit beta	K01890	FARSB, pheT	phenylalanyl-tRNA synthetase beta chain [EC:6.1.1.20]	COG0072	J	Translation, ribosomal structure and biogenesis	PTHR10947:SF0
T303_07400	GNAT family acetyltransferase	not assigned	not assigned	not assigned	COG0456	J	Translation, ribosomal structure and biogenesis	PTHR42919:SF11
T303_07405	phenylalanyl-tRNA synthase subunit alpha	K01889	FARSA, pheS	phenylalanyl-tRNA synthetase alpha chain [EC:6.1.1.20]	COG0016	J	Translation, ribosomal structure and biogenesis	PTHR11538:SF48
T303_07410	hypothetical protein	not assigned	not assigned	not assigned	not assigned	not assigned	not assigned	NOHIT
T303_07415	chromosome segregation protein SMC	K03529	smc	chromosome segregation protein	COG1196	D	Cell cycle control, cell division, chromosome partitioning	PTHR43941:SF1
T303_07420	ribonuclease III	K03685	rnc, DROSHA, RNT1	ribonuclease III [EC:3.1.26.3]	COG0571	K	Transcription	PTHR11207
T303_07425	dihydrodipicolinate synthase	K01714	dapA	4-hydroxy-tetrahydrodipicolinate synthase [EC:4.3.3.7]	COG0329	E,M	Amino acid transport and metabolism	PTHR12128:SF15
T303_07430	aspartate-semialdehyde dehydrogenase	K00133	asd	aspartate-semialdehyde dehydrogenase [EC:1.2.1.11]	COG0136	E	Amino acid transport and metabolism	PTHR46278:SF2
T303_07435	acetyltransferase	K03823	pat	phosphi nothricin acetyltransferase [EC:2.3.1.183]	COG1247	E	Amino acid transport and metabolism	PTHR43420:SF9
T303_07445	cardiolipin synthetase	K06131	clsA_B	cardiolipin synthase A/B [EC:2.7.8.-]	COG1502	I	Lipid transport and metabolism	PTHR21248:SF22
T303_07450	excinuclease ABC subunit C	K03703	uvrC	excinuclease ABC subunit C	COG0322	L	Replication, recombination and repair	PTHR30562:SF1
T303_07455	HAD family hydrolase	K07025	K07025	putative hydrolase of the HAD superfamily	COG1011	H	Coenzyme transport and metabolism	PTHR47478:SF1
T303_07460	serine dehydratase subunit beta	K01752	E4.3.1.17, sdaA, sdaB, tdcG	L-serine dehydratase [EC:4.3.1.17]	COG1760	E	Amino acid transport and metabolism	PTHR30182:SF12
T303_07470	hypothetical protein	not assigned	not assigned	not assigned	not assigned	not assigned	not assigned	NOHIT
T303_07475	multidrug ABC transporter permease	K01992	ABC-2.P	ABC-2 type transport system permease protein	COG3694	R	General function prediction only	PTHR36833:SF1
T303_07490	hypothetical protein	not assigned	not assigned	not assigned	not assigned	not assigned	not assigned	NOHIT
T303_07495	transcriptional regulator	not assigned	not assigned	not assigned	COG2197	T,K	Signal transduction mechanisms	PTHR43412:SF5
T303_07500	histidine kinase	K07778	desK	two-component system, NarL family, sensor histidine kinase DesK [EC:2.7.13.3]	COG4585	T	Signal transduction mechanisms	PTHR24421:SF10
T303_07505	ABC transporter	K01992	ABC-2.P	ABC-2 type transport system permease protein	not assigned	not assigned	not assigned	PTHR43077:SF2
T303_07510	multidrug ABC transporter ATP-binding protein	K01990	ABC-2.A	ABC-2 type transport system ATP-binding protein	COG1131	V	Defense mechanisms	PTHR42711:SF10
T303_07515	hypothetical protein	not assigned	not assigned	not assigned	not assigned	not assigned	not assigned	NOHIT
T303_07520	hypothetical protein	not assigned	not assigned	not assigned	not assigned	not assigned	not assigned	NOHIT
T303_07530	major facilitator superfamily permease	not assigned	not assigned	not assigned	not assigned	not assigned	not assigned	PTHR23513:SF11
T303_07540	XRE family transcriptional regulator	not assigned	not assigned	not assigned	not assigned	not assigned	not assigned	PTHR37038:SF12
T303_07545	NUDIX hydrolase	not assigned	not assigned	not assigned	COG1051	F	Nucleotide transport and metabolism	PTHR43736:SF1
T303_07550	hypothetical protein	not assigned	not assigned	not assigned	not assigned	not assigned	not assigned	NOHIT
T303_07555	hypothetical protein	not assigned	not assigned	not assigned	not assigned	not assigned	not assigned	NOHIT
T303_07560	ABC transporter ATP-binding protein	K01990	ABC-2.A	ABC-2 type transport system ATP-binding protein	not assigned	not assigned	not assigned	PTHR42711:SF10
T303_07565	hypothetical protein	not assigned	not assigned	not assigned	COG4758	S	Function unknown	PTHR40763
T303_07570	hypothetical protein	not assigned	not assigned	not assigned	not assigned	not assigned	not assigned	PTHR40763
T303_07575	Fe-S-oxidoreductase	K06940	K06940	uncharacterized protein	COG0727	R	General function prediction only	PTHR35866
T303_07580	peptide ABC transporter permease	K02004	ABC.CD.P	putative ABC transport system permease protein	not assigned	not assigned	not assigned	PTHR46795:SF3
T303_07585	bacteriocin ABC transporter ATP-binding protein	K02003	ABC.CD.A	putative ABC transport system ATP-binding protein	COG1136	M	Cell wall/membrane/envelope biogenesis	PTHR42798:SF3
T303_07590	sensor histidine kinase	not assigned	not assigned	not assigned	COG0642	T	Signal transduction mechanisms	PTHR43711:SF10
T303_07595	two-component response transcriptional regulator	not assigned	not assigned	not assigned	COG0745	K,T	Transcription	PTHR26402:SF519
T303_07610	hypothetical protein	K16169	pbuX	xanthine permease	not assigned	not assigned	not assigned	PTHR42810:SF4
T303_07615	multidrug transporter MatE	K03327	TC.MATE, SLC47A, norM, mdtK, dinF	multidrug resistance protein, MATE family	COG0534	V	Defense mechanisms	PTHR43298:SF2
T303_07620	peptide methionine sulfoxide reductase MsrB	K12267	msrAB	peptide methionine sulfoxide reductase msrA/msrB [EC:1.8.4.11 1.8.4.12]	COG0225	O	Posttranslational modification, protein turnover, chaperones	PTHR10173:SF50
T303_07625	branched-chain amino acid ABC transporter substrate-binding protein	K03311	TC.LIVCS	branched-chain amino acid:cation transporter, LIVCS family	COG1114	E	Amino acid transport and metabolism	PTHR30588:SF0
T303_07635	hypothetical protein	not assigned	not assigned	not assigned	not assigned	not assigned	not assigned	PTHR34977:SF1
T303_07640	amino acid permease	K03294	TC.APA	basic amino acid/polyamine antiporter, APA family	COG0531	E	Amino acid transport and metabolism	PTHR43243:SF24
T303_07645	hypothetical protein	K07078	K07078	uncharacterized protein	COG3560	R	General function prediction only	PTHR43035:SF1
T303_07650	glyoxalase	K07104	catE	catechol 2,3-dioxygenase [EC:1.13.11.2]	COG2514	Q	Secondary metabolites biosynthesis, transport and catabolism	PTHR43279:SF1
T303_07655	Rrf2 family transcriptional regulator	not assigned	not assigned	not assigned	COG1959	K	Transcription	PTHR33221:SF5
T303_07660	acyltransferase	not assigned	not assigned	not assigned	COG4814	S	Function unknown	PTHR11440:SF35
T303_07665	PTS fructose transporter subunit IIA	K02761	PTS-Cel-EIIC, celB, chbC	PTS system, cellobiose-specific IIC component	COG1455	G	Carbohydrate transport and metabolism	PTHR33989
T303_07670	NAD(P)H nitroreductase	not assigned	not assigned	not assigned	COG0778	C	Energy production and conversion	PTHR43673:SF3
T303_07675	membrane protein	not assigned	not assigned	not assigned	COG3619	S	Function unknown	PTHR37314:SF2
T303_07680	aldo/keto reductase	not assigned	not assigned	not assigned	COG0656	Q	Secondary metabolites biosynthesis, transport and catabolism	PTHR43827
T303_07690	ATP-dependent Zn protease	not assigned	not assigned	not assigned	COG4868	S	Function unknown	NOHIT
T303_07695	hypothetical protein	not assigned	not assigned	not assigned	not assigned	not assigned	not assigned	NOHIT
T303_07700	hypothetical protein	not assigned	not assigned	not assigned	not assigned	not assigned	not assigned	NOHIT
T303_07710	cell wall surface anchor protein	not assigned	not assigned	not assigned	not assigned	not assigned	not assigned	NOHIT
T303_07720	hypothetical protein	not assigned	not assigned	not assigned	not assigned	not assigned	not assigned	NOHIT
T303_07725	DNA-directed DNA polymerase	K03502	umuC	DNA polymerase V	COG0389	L	Replication, recombination and repair	PTHR11076:SF33
T303_07730	hypothetical protein	not assigned	not assigned	not assigned	not assigned	not assigned	not assigned	NOHIT
T303_07735	hypothetical protein	not assigned	not assigned	not assigned	not assigned	not assigned	not assigned	NOHIT
T303_07740	hypothetical protein	not assigned	not assigned	not assigned	not assigned	not assigned	not assigned	NOHIT
T303_07745	hypothetical protein	not assigned	not assigned	not assigned	not assigned	not assigned	not assigned	NOHIT
T303_07750	threonine transporter RhtB	not assigned	not assigned	not assigned	COG1280	E	Amino acid transport and metabolism	PTHR30086
T303_07755	hypothetical protein	not assigned	not assigned	not assigned	not assigned	not assigned	not assigned	NOHIT
T303_07765	glycosyl transferase	not assigned	not assigned	not assigned	COG1442	M	Cell wall/membrane/envelope biogenesis	PTHR22916:SF47
T303_07770	ABC transporter permease	K02004	ABC.CD.P	putative ABC transport system permease protein	not assigned	not assigned	not assigned	PTHR43738
T303_07775	peptide ABC transporter ATP-binding protein	K02003	ABC.CD.A	putative ABC transport system ATP-binding protein	COG1136	M	Cell wall/membrane/envelope biogenesis	PTHR24220:SF636
T303_07785	hypothetical protein	not assigned	not assigned	not assigned	not assigned	not assigned	not assigned	NOHIT
T303_07790	hypothetical protein	not assigned	not assigned	not assigned	not assigned	not assigned	not assigned	NOHIT
T303_07795	sodium transporter	not assigned	not assigned	not assigned	not assigned	not assigned	not assigned	PTHR43298
T303_07800	hypothetical protein	not assigned	not assigned	not assigned	not assigned	not assigned	not assigned	NOHIT
T303_07805	coenzyme PQQ synthesis protein	not assigned	not assigned	not assigned	not assigned	not assigned	not assigned	PTHR11228:SF34
T303_07810	major facilitator superfamily transporter	not assigned	not assigned	not assigned	not assigned	not assigned	not assigned	PTHR23530:SF1
T303_07820	hypothetical protein	not assigned	not assigned	not assigned	not assigned	not assigned	not assigned	NOHIT
T303_07825	MutR family transcriptional regulator	not assigned	not assigned	not assigned	not assigned	not assigned	not assigned	PTHR37038:SF12
T303_07830	transposase	K07497	K07497	putative transposase	COG2801	X	Mobilome - prophages, transposons	PTHR42648:SF3
T303_07840	hypothetical protein	not assigned	not assigned	not assigned	not assigned	not assigned	not assigned	NOHIT
T303_07845	hypothetical protein	not assigned	not assigned	not assigned	not assigned	not assigned	not assigned	NOHIT
T303_07850	peptidylprolyl isomerase	not assigned	not assigned	not assigned	not assigned	not assigned	not assigned	NOHIT
T303_07855	ATP-dependent dsDNA exonuclease	K03546	sbcC, rad50	DNA repair protein SbcC/Rad50	COG0419	L	Replication, recombination and repair	PTHR32114:SF2
T303_07860	ATP-dependent dsDNA exonuclease	K03547	sbcD, mre11	DNA repair protein SbcD/Mre11	COG0420	L	Replication, recombination and repair	PTHR30337:SF0
T303_07865	beta-galactosidase	K01190	lacZ	beta-galactosidase [EC:3.2.1.23]	COG3250	G	Carbohydrate transport and metabolism	PTHR46323
T303_07870	PTS sugar transporter subunit IIA	K16209	lacS, galP, rafP	lactose/raffinose/galactose permease	COG2211	G	Carbohydrate transport and metabolism	PTHR11328:SF40
T303_07875	galactose mutarotase	K01785	galM, GALM	aldose 1-epimerase [EC:5.1.3.3]	COG2017	G	Carbohydrate transport and metabolism	PTHR10091
T303_07880	UDP-glucose 4-epimerase	K01784	galE, GALE	UDP-glucose 4-epimerase [EC:5.1.3.2]	COG1087	M	Cell wall/membrane/envelope biogenesis	PTHR43725:SF16
T303_07885	galactose-1-phosphate uridylyltransferase	K00965	galT, GALT	UDPglucose--hexose-1-phosphate uridylyltransferase [EC:2.7.7.12]	COG4468	G	Carbohydrate transport and metabolism	PTHR39191:SF1
T303_07890	galactokinase	K00849	galK	galactokinase [EC:2.7.1.6]	COG0153	G	Carbohydrate transport and metabolism	PTHR10457:SF6
T303_07895	LacI family transcriptional regulator galR	K02529	lacI, galR	LacI family transcriptional regulator	COG1609	K	Transcription	PTHR30146:SF103
T303_07905	metalloendopeptidase	K08643	zmpB	zinc metalloprotease ZmpB [EC:3.4.24.-]	not assigned	not assigned	not assigned	NOHIT
T303_07910	zinc metalloprotease ZmpB	not assigned	not assigned	not assigned	not assigned	not assigned	not assigned	NOHIT
T303_07915	ABC transporter ATP-binding protein	not assigned	not assigned	not assigned	not assigned	not assigned	not assigned	PTHR19211:SF67
T303_07920	homoserine kinase	K06147	ABCB-BAC	ATP-binding cassette, subfamily B, bacterial	not assigned	not assigned	not assigned	PTHR24222
T303_07925	multidrug ABC transporter ATPase	not assigned	not assigned	not assigned	not assigned	not assigned	not assigned	PTHR24221:SF276
T303_07930	glutamate--cysteine ligase	K01919	gshA	glutamate--cysteine ligase [EC:6.3.2.2]	COG2918	H	Coenzyme transport and metabolism	PTHR38761:SF1
T303_07935	transposase IS1193	not assigned	not assigned	not assigned	not assigned	not assigned	not assigned	PTHR33498:SF1
T303_07940	pullulanase	K01200	pulA	pullulanase [EC:3.2.1.41]	not assigned	not assigned	not assigned	PTHR43631:SF1
T303_07945	pullulanase	not assigned	not assigned	not assigned	not assigned	not assigned	not assigned	PTHR43631:SF1
T303_07950	pullulanase	K01200	pulA	pullulanase [EC:3.2.1.41]	not assigned	not assigned	not assigned	PTHR43631:SF1
T303_07955	cell division protein FtsK	K03466	ftsK, spoIIIE	DNA segregation ATPase FtsK/SpoIIIE, S-DNA-T family	COG1674	D	Cell cycle control, cell division, chromosome partitioning	PTHR22683:SF41
T303_07960	ferredoxin--NADP reductase	K21567	fnr	ferredoxin/flavodoxin---NADP+ reductase [EC:1.18.1.2 1.19.1.1]	COG0492	O	Posttranslational modification, protein turnover, chaperones	PTHR42863:SF4
T303_07965	tRNA (guanine-N1)-methyltransferase	K00554	trmD	tRNA (guanine37-N1)-methyltransferase [EC:2.1.1.228]	COG0336	J	Translation, ribosomal structure and biogenesis	PTHR46417:SF1
T303_07970	16S rRNA-processing protein RimM	K02860	rimM	16S rRNA processing protein RimM	COG0806	J	Translation, ribosomal structure and biogenesis	PTHR33692:SF1
T303_07975	tRNA Glu	K14224	tRNA-Glu	tRNA Glu	not assigned	not assigned	not assigned	NOHIT
T303_07980	tRNA Gln	K14223	tRNA-Gln	tRNA Gln	not assigned	not assigned	not assigned	NOHIT
T303_07985	two-component response transcriptional regulator (CheY-like receiver and HTH DNA-binding domains), putative	K11618	liaR	two-component system, NarL family, response regulator LiaR	COG2197	T,K	Signal transduction mechanisms	PTHR43214:SF15
T303_07990	sensor kinase	K11617	liaS	two-component system, NarL family, sensor histidine kinase LiaS [EC:2.7.13.3]	COG4585	T	Signal transduction mechanisms	PTHR24421:SF37
T303_07995	transporter	not assigned	not assigned	not assigned	COG4758	S	Function unknown	NOHIT
T303_08000	hypothetical protein	K10716	kch, trkA, mthK, pch	voltage-gated potassium channel	not assigned	not assigned	not assigned	PTHR11537:SF14
T303_08005	serine/threonine protein kinase	K12132	prkC, stkP	eukaryotic-like serine/threonine-protein kinase [EC:2.7.11.1]	COG0515	T	Signal transduction mechanisms	PTHR43289
T303_08010	protein phosphatase	K20074	prpC, phpP	PPM family protein phosphatase [EC:3.1.3.16]	COG0631	T	Signal transduction mechanisms	PTHR13832:SF278
T303_08015	16S rRNA methyltransferase	K03500	rsmB, sun	16S rRNA (cytosine967-C5)-methyltransferase [EC:2.1.1.176]	COG0144	J	Translation, ribosomal structure and biogenesis	PTHR22807:SF53
T303_08020	methionyl-tRNA formyltransferase	K00604	MTFMT, fmt	methionyl-tRNA formyltransferase [EC:2.1.2.9]	COG0223	J	Translation, ribosomal structure and biogenesis	PTHR11138:SF4
T303_08025	primosome assembly protein PriA	K04066	priA	primosomal protein N' (replication factor Y) (superfamily II helicase) [EC:3.6.4.-]	COG1198	L	Replication, recombination and repair	PTHR30580:SF0
T303_08030	DNA-directed RNA polymerase subunit omega	K03060	rpoZ	DNA-directed RNA polymerase subunit omega [EC:2.7.7.6]	COG1758	K	Transcription	PTHR34476:SF1
T303_08035	guanylate kinase	K00942	E2.7.4.8, gmk	guanylate kinase [EC:2.7.4.8]	COG0194	F	Nucleotide transport and metabolism	PTHR23117
T303_08040	cell division protein FtsY	K03110	ftsY	fused signal recognition particle receptor	COG0552	U	Intracellular trafficking, secretion, and vesicular transport	PTHR43134:SF1
T303_08045	haloacid dehalogenase	not assigned	not assigned	not assigned	COG0561	R,H	General function prediction only	PTHR10000:SF8
T303_08050	HAD family hydrolase	not assigned	not assigned	not assigned	COG0561	R,H	General function prediction only	PTHR10000
T303_08055	GntR family transcriptional regulator	not assigned	not assigned	not assigned	COG1725	K	Transcription	PTHR38445:SF6
T303_08060	multidrug ABC transporter ATP-binding protein	K01990	ABC-2.A	ABC-2 type transport system ATP-binding protein	COG1131	V	Defense mechanisms	PTHR43158:SF1
T303_08065	ABC transporter permease	not assigned	not assigned	not assigned	not assigned	not assigned	not assigned	NOHIT
T303_08070	peptide ABC transporter ATP-binding protein	K10823	oppF	oligopeptide transport system ATP-binding protein	not assigned	not assigned	not assigned	PTHR43776:SF7
T303_08075	peptide ABC transporter ATP-binding protein	K15583	oppD	oligopeptide transport system ATP-binding protein	COG0444	E,P	Amino acid transport and metabolism	PTHR24220:SF607
T303_08080	peptide ABC transporter permease	K15582	oppC	oligopeptide transport system permease protein	COG1173	E,P	Amino acid transport and metabolism	PTHR43386:SF2
T303_08085	peptide ABC transporter permease	K15581	oppB	oligopeptide transport system permease protein	not assigned	not assigned	not assigned	PTHR30465:SF74
T303_08090	peptide ABC transporter ATP-binding protein	K15580	oppA, mppA	oligopeptide transport system substrate-binding protein	COG4166	E	Amino acid transport and metabolism	PTHR30290:SF10
T303_08095	transposase IS1193	not assigned	not assigned	not assigned	COG3464	X	Mobilome - prophages, transposons	PTHR33498:SF1
T303_08100	peptide ABC transporter ATP-binding protein	K15580	oppA, mppA	oligopeptide transport system substrate-binding protein	COG4166	E	Amino acid transport and metabolism	PTHR30290:SF10
T303_08105	transposase	K07483	K07483	transposase	COG2963	X	Mobilome - prophages, transposons	PTHR33215
T303_08110	transposase IS904	K07497	K07497	putative transposase	COG2801	X	Mobilome - prophages, transposons	PTHR46889:SF1
T303_08120	hydrolase, amidohydrolase superfamily	K03424	tatD	TatD DNase family protein [EC:3.1.21.-]	not assigned	not assigned	not assigned	PTHR46124
T303_08125	permease of the major facilitator superfamily	K08177	oxlT	MFS transporter, OFA family, oxalate/formate antiporter	COG2223	P	Inorganic ion transport and metabolism	PTHR11360:SF3
T303_08130	transposase	K07497	K07497	putative transposase	not assigned	not assigned	not assigned	PTHR42648:SF3
T303_08140	phosphotransacetylase	K00625	E2.3.1.8, pta	phosphate acetyltransferase [EC:2.3.1.8]	COG0280	C	Energy production and conversion	PTHR43356:SF3
T303_08145	23S rRNA pseudouridine synthase	K06180	rluD	23S rRNA pseudouridine1911/1915/1917 synthase [EC:5.4.99.23]	COG0564	J	Translation, ribosomal structure and biogenesis	PTHR21600:SF35
T303_08150	ATP-NAD kinase	K00858	ppnK, NADK	NAD+ kinase [EC:2.7.1.23]	COG0061	F	Nucleotide transport and metabolism	PTHR20275:SF0
T303_08155	GTP pyrophosphokinase	K07816	E2.7.6.5X	putative GTP pyrophosphokinase [EC:2.7.6.5]	COG2357	F,T	Nucleotide transport and metabolism	PTHR47837:SF1
T303_08160	adenylate cyclase	not assigned	not assigned	not assigned	COG4116	S	Function unknown	PTHR34948
T303_08165	ribose-phosphate pyrophosphokinase	K00948	PRPS, prsA	ribose-phosphate pyrophosphokinase [EC:2.7.6.1]	COG0462	F,E	Nucleotide transport and metabolism	PTHR10210:SF41
T303_08170	cysteine desulfurase	K04487	iscS, NFS1	cysteine desulfurase [EC:2.8.1.7]	COG1104	E	Amino acid transport and metabolism	PTHR11601:SF52
T303_08175	cysteine desulfurase	not assigned	not assigned	not assigned	not assigned	not assigned	not assigned	NOHIT
T303_08180	redox-sensing transcriptional repressor Rex	K01926	rex	redox-sensing transcriptional repressor	COG2344	K	Transcription	PTHR35786:SF1
T303_08185	gamma-glutamyl hydrolase	K07010	K07010	putative glutamine amidotransferase	COG2071	E	Amino acid transport and metabolism	PTHR43235:SF1
T303_08190	DNA repair protein RadC	K03630	radC	DNA repair protein RadC	COG2003	L	Replication, recombination and repair	PTHR30471:SF3
T303_08195	alpha-L-Rha alpha-1,3-L-rhamnosyltransferase	K07272	rgpF	rhamnosyltransferase [EC:2.4.1.-]	COG3754	M	Cell wall/membrane/envelope biogenesis	NOHIT
T303_08200	glycosyl transferase	K12998	rgpE	glucosyltransferase [EC:2.4.1.-]	not assigned	not assigned	not assigned	PTHR43685:SF2
T303_08205	polysaccharide ABC exporter ATP-binding protein	K01990	ABC-2.A	ABC-2 type transport system ATP-binding protein	COG1134	G,M	Carbohydrate transport and metabolism	PTHR46743
T303_08210	polysaccharide ABC exporter membrane-spanning protein	K01992	ABC-2.P	ABC-2 type transport system permease protein	COG1682	G,M	Carbohydrate transport and metabolism	PTHR30413
T303_08215	rhamnosyl transferase	K12997	rgpB	rhamnosyltransferase [EC:2.4.1.-]	not assigned	not assigned	not assigned	PTHR22916
T303_08220	rhamnosyl transferase	K12996	rgpA	rhamnosyltransferase [EC:2.4.1.-]	COG0438	M	Cell wall/membrane/envelope biogenesis	PTHR12526
T303_08225	beta-carotene 15,15'-monooxygenase	not assigned	not assigned	not assigned	COG4713	S	Function unknown	NOHIT
T303_08230	glycosyl transferases	not assigned	not assigned	not assigned	COG0463	M	Cell wall/membrane/envelope biogenesis	PTHR22916:SF51
T303_08235	polysaccharide biosynthesis protein transporter	not assigned	not assigned	not assigned	COG2244	M	Cell wall/membrane/envelope biogenesis	PTHR30250
T303_08240	glycosyl transferase	K09153	K09153	small membrane protein	COG2456	S	Function unknown	NOHIT
T303_08245	glycosyl transferase	not assigned	not assigned	not assigned	not assigned	not assigned	not assigned	PTHR10859:SF105
T303_08250	dTDP-4-dehydrorhamnose reductase	K00067	rfbD, rmlD	dTDP-4-dehydrorhamnose reductase [EC:1.1.1.133]	COG1091	M	Cell wall/membrane/envelope biogenesis	PTHR10491:SF4
T303_08255	transporter	not assigned	not assigned	not assigned	not assigned	not assigned	not assigned	NOHIT
T303_08260	glycosyl transferase	K12999	rgpI	glucosyltransferase [EC:2.4.1.-]	COG0463	M	Cell wall/membrane/envelope biogenesis	PTHR42992:SF2
T303_08265	aromatic ring hydroxylating protein	not assigned	not assigned	not assigned	COG2151	O	Posttranslational modification, protein turnover, chaperones	PTHR42831:SF1
T303_08270	RNA polymerase sigma factor RpoD	K03086	rpoD	RNA polymerase primary sigma factor	COG0568	K	Transcription	PTHR30603:SF0
T303_08275	DNA primase	K02316	dnaG	DNA primase [EC:2.7.7.-]	COG0358	L	Replication, recombination and repair	PTHR30313:SF2
T303_08280	histidine kinase	K03282	mscL	large conductance mechanosensitive channel	not assigned	not assigned	not assigned	NOHIT
T303_08285	30S ribosomal protein S21	K02970	RP-S21, MRPS21, rpsU	small subunit ribosomal protein S21	not assigned	not assigned	not assigned	PTHR21109
T303_08290	amino acid ABC transporter substrate-binding protein	K02030	ABC.PA.S	polar amino acid transport system substrate-binding protein	COG0834	E,T	Amino acid transport and metabolism	PTHR35936:SF17
T303_08295	aminotransferase	not assigned	not assigned	not assigned	COG0436	E	Amino acid transport and metabolism	PTHR43510:SF1
T303_08300	amino acid ABC transporter substrate-binding protein	K02030	ABC.PA.S	polar amino acid transport system substrate-binding protein	COG0834	E,T	Amino acid transport and metabolism	PTHR35936:SF17
T303_08305	amino acid ABC transporter substrate-binding protein	K02030	ABC.PA.S	polar amino acid transport system substrate-binding protein	COG0834	E,T	Amino acid transport and metabolism	PTHR35936:SF17
T303_08310	NUDIX hydrolase	K03574	mutT, NUDT15, MTH2	8-oxo-dGTP diphosphatase [EC:3.6.1.55]	COG1051	F	Nucleotide transport and metabolism	PTHR43046:SF2
T303_08315	excinuclease ABC subunit B	K03702	uvrB	excinuclease ABC subunit B	COG0556	L	Replication, recombination and repair	PTHR24029:SF0
T303_08320	hypothetical protein	not assigned	not assigned	not assigned	not assigned	not assigned	not assigned	NOHIT
T303_08325	hypothetical protein	K07052	K07052	uncharacterized protein	not assigned	not assigned	not assigned	PTHR39430:SF1
T303_08330	hypothetical protein	K07052	K07052	uncharacterized protein	not assigned	not assigned	not assigned	NOHIT
T303_08335	amino acid ABC transporter permease	K02029	ABC.PA.P	polar amino acid transport system permease protein	COG0765,COG0834	E,T	Amino acid transport and metabolism	PTHR30614:SF40
T303_08340	peptide ABC transporter ATP-binding protein	K02028	ABC.PA.A	polar amino acid transport system ATP-binding protein [EC:7.4.2.1]	COG1126	E	Amino acid transport and metabolism	PTHR43166:SF4
T303_08345	GTPase	not assigned	not assigned	not assigned	not assigned	not assigned	not assigned	NOHIT
T303_08350	GTPase CgtA	K03979	obgE, cgtA	GTPase [EC:3.6.5.-]	COG0536	D,L	Cell cycle control, cell division, chromosome partitioning	PTHR11702
T303_08355	hypothetical protein	not assigned	not assigned	not assigned	not assigned	not assigned	not assigned	NOHIT
T303_08360	16S pseudouridylate synthase	K06183	rsuA	16S rRNA pseudouridine516 synthase [EC:5.4.99.19]	COG1187	J	Translation, ribosomal structure and biogenesis	PTHR21600:SF19
T303_08365	hypothetical protein	not assigned	not assigned	not assigned	not assigned	not assigned	not assigned	PTHR36444:SF3
T303_08370	hypothetical protein	not assigned	not assigned	not assigned	not assigned	not assigned	not assigned	NOHIT
T303_08375	thioesterase	K02614	paaI	acyl-CoA thioesterase [EC:3.1.2.-]	COG2050	Q	Secondary metabolites biosynthesis, transport and catabolism	PTHR43240
T303_08380	salt-stress induced protein	not assigned	not assigned	not assigned	not assigned	not assigned	not assigned	NOHIT
T303_08385	hypothetical protein	not assigned	not assigned	not assigned	not assigned	not assigned	not assigned	PTHR30532
T303_08390	drug/metabolite transporter permease	not assigned	not assigned	not assigned	COG0697	E,G,R	Amino acid transport and metabolism	PTHR42920:SF2
T303_08395	membrane protein	not assigned	not assigned	not assigned	not assigned	not assigned	not assigned	NOHIT
T303_08400	CRISPR-associated protein Csn2	K19137	csn2	CRISPR-associated protein Csn2	not assigned	not assigned	not assigned	NOHIT
T303_08405	CRISPR-associated protein Cas2	K09951	cas2	CRISPR-associated protein Cas2	COG3512	V	Defense mechanisms	NOHIT
T303_08410	CRISPR-associated protein Cas1	not assigned	not assigned	not assigned	COG1518	V	Defense mechanisms	PTHR34353:SF2
T303_08415	CRISPR-associated protein Csn1	K09952	csn1, cas9	CRISPR-associated endonuclease Csn1 [EC:3.1.-.-]	COG3513	V	Defense mechanisms	NOHIT
T303_08420	phosphoserine phosphatase	K01079	serB, PSPH	phosphoserine phosphatase [EC:3.1.3.3]	COG0560	E	Amino acid transport and metabolism	PTHR43344:SF2
T303_08425	septation ring formation regulator EzrA	K06286	ezrA	septation ring formation regulator	COG4477	D	Cell cycle control, cell division, chromosome partitioning	PTHR32089:SF92
T303_08430	DNA gyrase subunit B	K02470	gyrB	DNA gyrase subunit B [EC:5.99.1.3]	COG0187	L	Replication, recombination and repair	PTHR45866:SF5
T303_08435	P-Ser-HPr phosphatase	not assigned	not assigned	not assigned	COG0546	C	Energy production and conversion	PTHR43434:SF1
T303_08440	membrane protein	not assigned	not assigned	not assigned	COG1346	M	Cell wall/membrane/envelope biogenesis	PTHR30249:SF10
T303_08445	murein hydrolase regulator LrgA	K06518	cidA	holin-like protein	COG1380	R	General function prediction only	PTHR33931
T303_08450	tRNA Thr	K14234	tRNA-Thr	tRNA Thr	not assigned	not assigned	not assigned	NOHIT
T303_08455	arsenate reductase	not assigned	not assigned	not assigned	COG1393	P	Inorganic ion transport and metabolism	PTHR30041:SF4
T303_08460	methylated-DNA-protein-cysteine methyltransferase	K00567	ogt, MGMT	methylated-DNA-[protein]-cysteine S-methyltransferase [EC:2.1.1.63]	not assigned	not assigned	not assigned	PTHR10815
T303_08465	3-phosphoglycerate dehydrogenase	K00058	serA, PHGDH	D-3-phosphoglycerate dehydrogenase / 2-oxoglutarate reductase [EC:1.1.1.95 1.1.1.399]	COG0111	H,R	Coenzyme transport and metabolism	PTHR42938:SF13
T303_08470	GNAT family acetyltransferase	not assigned	not assigned	not assigned	not assigned	not assigned	not assigned	PTHR43617
T303_08475	phosphoserine aminotransferase	K00831	serC, PSAT1	phosphoserine ami notransferase [EC:2.6.1.52]	COG1932	E,H	Amino acid transport and metabolism	PTHR43247:SF2
T303_08485	lactoylglutathione lyase	K01759	GLO1, gloA	lactoylglutathione lyase [EC:4.4.1.5]	COG0346	Q	Secondary metabolites biosynthesis, transport and catabolism	PTHR46036:SF5
T303_08495	spermidine/putrescine ABC transporter substrate-binding protein	K11069	potD	spermidine/putrescine transport system substrate-binding protein	COG0687	E	Amino acid transport and metabolism	PTHR30222:SF5
T303_08500	spermidine/purescine ABC transporter permease	K11070	potC	spermidine/putrescine transport system permease protein	COG1177	E	Amino acid transport and metabolism	PTHR43848:SF2
T303_08505	spermidine/putrescine ABC transporter permease	K11071	potB	spermidine/putrescine transport system permease protein	COG1176	E	Amino acid transport and metabolism	PTHR42929:SF1
T303_08510	spermidine/putrescine ABC transporter ATP-binding protein	K11072	potA	spermidine/putrescine transport system ATP-binding protein [EC:3.6.3.31]	COG3842	E	Amino acid transport and metabolism	PTHR42781:SF4
T303_08515	UDP-N-acetylenolpyruvoylglucosamine reductase	K00075	murB	UDP-N-acetylmuramate dehydrogenase [EC:1.3.1.98]	COG0812	M	Cell wall/membrane/envelope biogenesis	PTHR21071
T303_08520	2-amino-4-hydroxy-6-hydroxymethyldihydropteridine pyrophosphokinase	K00950	folK	2-amino-4-hydroxy-6-hydroxymethyldihydropteridine diphosphokinase [EC:2.7.6.3]	COG0801	H	Coenzyme transport and metabolism	PTHR43071:SF1
T303_08525	dihydroneopterin aldolase	K01633	folB	7,8-dihydroneopterin aldolase/epimerase/oxygenase [EC:4.1.2.25 5.1.99.8 1.13.11.81]	COG1539	H	Coenzyme transport and metabolism	PTHR42844:SF5
T303_08530	alpha-amylase	K01176	AMY, amyA, malS	alpha-amylase [EC:3.2.1.1]	COG0366	G	Carbohydrate transport and metabolism	PTHR43447:SF1
T303_08535	dihydropteroate synthase	K00796	folP	dihydropteroate synthase [EC:2.5.1.15]	COG0294	H	Coenzyme transport and metabolism	PTHR20941
T303_08540	GTP cyclohydrolase I	K01495	GCH1, folE	GTP cyclohydrolase IA [EC:3.5.4.16]	COG0302	H	Coenzyme transport and metabolism	PTHR11109:SF7
T303_08545	amino acid specific permease	not assigned	not assigned	not assigned	COG0531	E	Amino acid transport and metabolism	PTHR47704:SF1
T303_08550	dihydrofolate synthase	K11754	folC	dihydrofolate synthase / folylpolyglutamate synthase [EC:6.3.2.12 6.3.2.17]	COG0285	H	Coenzyme transport and metabolism	PTHR11136:SF0
T303_08555	RNA-binding protein	K06960	K06960	uncharacterized protein	COG1837	R	General function prediction only	PTHR34654:SF1
T303_08560	30S ribosomal protein S16	K02959	RP-S16, MRPS16, rpsP	small subunit ribosomal protein S16	COG0228	J	Translation, ribosomal structure and biogenesis	PTHR12919:SF20
T303_08565	tellurite resistance protein TehB	K16868	tehB	tellurite methyltransferase [EC:2.1.1.265]	COG3615	S	Function unknown	PTHR43464:SF32
T303_08575	hypothetical protein	not assigned	not assigned	not assigned	not assigned	not assigned	not assigned	NOHIT
T303_08580	exodeoxyribonuclease	K01142	E3.1.11.2, xthA	exodeoxyribonuclease III [EC:3.1.11.2]	COG0708	L	Replication, recombination and repair	PTHR22748:SF6
T303_08585	citrulline cluster-linked protein	not assigned	not assigned	not assigned	COG4708	S	Function unknown	PTHR40044:SF1
T303_08595	lipid kinase	K07029	dagK	diacylglycerol kinase (ATP) [EC:2.7.1.107]	COG1597	I,R	Lipid transport and metabolism	PTHR12358:SF77
T303_08600	DNA ligase LigA	K01972	E6.5.1.2, ligA, ligB	DNA ligase (NAD+) [EC:6.5.1.2]	COG0272	L	Replication, recombination and repair	PTHR23389:SF9
T303_08605	queuosine transporter QueT	not assigned	not assigned	not assigned	COG4708	S	Function unknown	PTHR40044:SF1
T303_08610	tRNA-processing ribonuclease BN	K07058	K07058	membrane protein	COG1295	S	Function unknown	PTHR30213:SF1
T303_08615	methionine aminopeptidase	K01265	map	methionyl aminopeptidase [EC:3.4.11.18]	COG0024	J	Translation, ribosomal structure and biogenesis	PTHR43330:SF17
T303_08620	transcriptional regulator containing CBS domains	not assigned	not assigned	not assigned	COG4109	K	Transcription	PTHR43080:SF2
T303_08625	GNAT family acetyltransferase	K03790	rimJ	[ribosomal protein S5]-alanine N-acetyltransferase [EC:2.3.1.267]	COG1670	J,O	Translation, ribosomal structure and biogenesis	PTHR43792:SF1
T303_08630	UDP-N-acetylglucosamine 1-carboxyvinyltransferase	K00790	murA	UDP-N-acetylglucosamine 1-carboxyvinyltransferase [EC:2.5.1.7]	COG0766	M	Cell wall/membrane/envelope biogenesis	PTHR43783:SF2
T303_08635	competence protein ComEC	K02238	comEC	competence protein ComEC	COG2333	R	General function prediction only	PTHR30619:SF6
T303_08640	late competence protein required for DNA binding and uptake	K02237	comEA	competence protein ComEA	COG1555	L	Replication, recombination and repair	PTHR21180:SF32
T303_08645	1-acyl-sn-glycerol-3-phosphate acyltransferase	K00655	plsC	1-acyl-sn-glycerol-3-phosphate acyltransferase [EC:2.3.1.51]	COG0204	I	Lipid transport and metabolism	PTHR10434:SF38
T303_08650	deacetylase	not assigned	not assigned	not assigned	COG0726	M,G	Cell wall/membrane/envelope biogenesis	PTHR10587
T303_08655	methyltransferase	not assigned	not assigned	not assigned	COG4123	J	Translation, ribosomal structure and biogenesis	PTHR47739:SF1
T303_08660	hypothetical protein	K07461	K07461	putative endonuclease	COG2827	L	Replication, recombination and repair	PTHR34477:SF1
T303_08665	RNA helicase	K05592	deaD, cshA	ATP-dependent RNA helicase DeaD [EC:3.6.4.13]	COG0513	L	Replication, recombination and repair	PTHR24031:SF276
T303_08670	magnesium transporter	not assigned	not assigned	not assigned	COG0598	P	Inorganic ion transport and metabolism	PTHR47891:SF1
T303_08675	helicase	not assigned	not assigned	not assigned	not assigned	not assigned	not assigned	PTHR35796:SF3
T303_08680	proton-coupled thiamine transporter YuaJ	K16789	thiT	thiamine transporter	COG3859	H	Coenzyme transport and metabolism	PTHR38438:SF1
T303_08685	MutR family transcriptional regulator	not assigned	not assigned	not assigned	not assigned	not assigned	not assigned	PTHR37038:SF12
T303_08690	permease of the major facilitator superfamily	not assigned	not assigned	not assigned	not assigned	not assigned	not assigned	PTHR23513:SF11
T303_08695	peptide chain release factor 3	K02837	prfC	peptide chain release factor 3	COG4108	J	Translation, ribosomal structure and biogenesis	PTHR43556:SF2
T303_08700	hypothetical protein	not assigned	not assigned	not assigned	not assigned	not assigned	not assigned	NOHIT
T303_08705	UDP-N-acetylmuramoyl-tripeptide--D-alanyl-D-alanine ligase	K01929	murF	UDP-N-acetylmuramoyl-tripeptide--D-alanyl-D-alanine ligase [EC:6.3.2.10]	COG0770	M	Cell wall/membrane/envelope biogenesis	PTHR43024:SF1
T303_08720	amino acid ABC transporter substrate-binding protein	K02030	ABC.PA.S	polar amino acid transport system substrate-binding protein	COG0834	E,T	Amino acid transport and metabolism	PTHR35936:SF17
T303_08725	glutamine ABC transporter ATP-binding protein	K02028	ABC.PA.A	polar amino acid transport system ATP-binding protein [EC:7.4.2.1]	COG1126	E	Amino acid transport and metabolism	PTHR43166:SF23
T303_08730	amino acid ABC transporter permease	K02029	ABC.PA.P	polar amino acid transport system permease protein	COG0765	E	Amino acid transport and metabolism	PTHR30614:SF36
T303_08735	polar amino acid ABC transporter permease	K02029	ABC.PA.P	polar amino acid transport system permease protein	COG0765	E	Amino acid transport and metabolism	PTHR30614:SF37
T303_08740	D-alanine--D-alanine ligase	K01921	ddl	D-alanine-D-alanine ligase [EC:6.3.2.4]	COG1181	M,R	Cell wall/membrane/envelope biogenesis	PTHR23132:SF8
T303_08745	copper-binding protein	not assigned	not assigned	not assigned	not assigned	not assigned	not assigned	PTHR10003:SF27
T303_08750	ActP protein	K17686	copA, ATP7	Cu+-exporting ATPase [EC:3.6.3.54]	COG2217	P	Inorganic ion transport and metabolism	PTHR43520
T303_08755	uracil phosphoribosyltransferase	not assigned	not assigned	not assigned	COG3682	K	Transcription	PTHR34134:SF1
T303_08760	tryptophan synthase subunit alpha	K01695	trpA	tryptophan synthase alpha chain [EC:4.2.1.20]	COG0159	E	Amino acid transport and metabolism	PTHR43455:SF1
T303_08765	tryptophan synthase subunit beta	K01696	trpB	tryptophan synthase beta chain [EC:4.2.1.20]	COG0133	E	Amino acid transport and metabolism	PTHR42882
T303_08770	N-(5'-phosphoribosyl)anthranilate isomerase	K01817	trpF	phosphoribosylanthranilate isomerase [EC:5.3.1.24]	COG0135	E	Amino acid transport and metabolism	PTHR42894
T303_08775	indole-3-glycerol-phosphate synthase	K01609	trpC	indole-3-glycerol phosphate synthase [EC:4.1.1.48]	COG0134	E	Amino acid transport and metabolism	PTHR22854
T303_08780	anthranilate phosphoribosyltransferase	K00766	trpD	anthranilate phosphoribosyltransferase [EC:2.4.2.18]	COG0547	E	Amino acid transport and metabolism	PTHR43285:SF2
T303_08785	anthranilate synthase subunit II	K01658	trpG	anthranilate synthase component II [EC:4.1.3.27]	COG0512	E,H	Amino acid transport and metabolism	PTHR43418:SF8
T303_08790	anthranilate synthase subunit I	K01657	trpE	anthranilate synthase component I [EC:4.1.3.27]	COG0147	E,H	Amino acid transport and metabolism	PTHR11236:SF9
T303_08795	chorismate mutase	not assigned	not assigned	not assigned	COG1605	E	Amino acid transport and metabolism	PTHR38041:SF1
T303_08800	dihydroorotate dehydrogenase	not assigned	not assigned	not assigned	not assigned	not assigned	not assigned	NOHIT
T303_08805	ATPase	K12952	ctpE	cation-transporting P-type ATPase E [EC:3.6.3.-]	COG0474	P	Inorganic ion transport and metabolism	PTHR24093:SF422
T303_08810	hypothetical protein	not assigned	not assigned	not assigned	not assigned	not assigned	not assigned	NOHIT
T303_08815	hypothetical protein	K09747	K09747	uncharacterized protein	COG0718	R	General function prediction only	PTHR33449:SF1
T303_08825	MerR family transcriptional regulator	not assigned	not assigned	not assigned	COG0789	K	Transcription	PTHR30204
T303_08830	DNA polymerase III subunit epsilon	K02342	dnaQ	DNA polymerase III subunit epsilon [EC:2.7.7.7]	not assigned	not assigned	not assigned	PTHR30231
T303_08835	hypothetical protein	not assigned	not assigned	not assigned	not assigned	not assigned	not assigned	PTHR24567:SF58
T303_08840	metal-sulfur cluster biosynthetic enzyme	not assigned	not assigned	not assigned	COG2151	O	Posttranslational modification, protein turnover, chaperones	PTHR42831:SF1
T303_08845	dihydroxy-acid dehydratase	K01687	ilvD	dihydroxy-acid dehydratase [EC:4.2.1.9]	COG0129	E,G	Amino acid transport and metabolism	PTHR21000:SF5
T303_08850	pyridine nucleotide-disulfide oxidoreductase	K07007	baiN	3-dehydro-bile acid Delta4,6-reductase [EC:1.3.1.114]	COG2081	R	General function prediction only	PTHR42887:SF2
T303_08855	tRNA Ser	K14233	tRNA-Ser	tRNA Ser	not assigned	not assigned	not assigned	NOHIT
T303_08860	tRNA (guanine-N(7)-)-methyltransferase	K03439	trmB, METTL1, TRM8	tRNA (guanine-N7-)-methyltransferase [EC:2.1.1.33]	COG0220	J	Translation, ribosomal structure and biogenesis	PTHR23417:SF14
T303_08865	aminoglycoside phosphotransferase	not assigned	not assigned	not assigned	COG0510	H	Coenzyme transport and metabolism	PTHR40086:SF1
T303_08870	ABC-type exoprotein transport system, permease component	K01992	ABC-2.P	ABC-2 type transport system permease protein	COG4473	U	Intracellular trafficking, secretion, and vesicular transport	NOHIT
T303_08875	multidrug ABC transporter ATP-binding protein	K01990	ABC-2.A	ABC-2 type transport system ATP-binding protein	COG1131	V	Defense mechanisms	PTHR42939:SF5
T303_08880	histidine triad protein	K02503	HINT1, hinT, hit	histidine triad (HIT) family protein	COG0537	F,R,G	Nucleotide transport and metabolism	PTHR46648:SF1
T303_08885	hypothetical protein	not assigned	not assigned	not assigned	not assigned	not assigned	not assigned	PTHR37614:SF1
T303_08890	hypothetical protein	not assigned	not assigned	not assigned	not assigned	not assigned	not assigned	NOHIT
T303_08895	phosphoribosylglycinamide synthetase	not assigned	not assigned	not assigned	not assigned	not assigned	not assigned	NOHIT
T303_08900	hypothetical protein	not assigned	not assigned	not assigned	not assigned	not assigned	not assigned	NOHIT
T303_08905	ATP-dependent Clp protease ATP-binding protein	K04086	clpL	ATP-dependent Clp protease ATP-binding subunit ClpL	COG0542	O	Posttranslational modification, protein turnover, chaperones	PTHR43572:SF11
T303_08910	hypothetical protein	not assigned	not assigned	not assigned	COG1323	R	General function prediction only	PTHR37825:SF1
T303_08915	SAM-dependent methyltransferase	not assigned	not assigned	not assigned	not assigned	not assigned	not assigned	PTHR43591:SF16
T303_08920	Iojap family protein	K09710	ybeB	ribosome-associated protein	COG0799	J	Translation, ribosomal structure and biogenesis	PTHR21043:SF0
T303_08925	hypothetical protein	not assigned	not assigned	not assigned	COG1713	R	General function prediction only	PTHR35795:SF1
T303_08930	nicotinic acid mononucleotide adenylyltransferase	K00969	nadD	nicotinate-nucleotide adenylyltransferase [EC:2.7.7.18]	COG1057	H	Coenzyme transport and metabolism	PTHR39321:SF3
T303_08935	RNA-binding protein	K07574	yhbY	RNA-binding protein	COG1534	J	Translation, ribosomal structure and biogenesis	PTHR40065:SF3
T303_08940	GTPase	K06948	yqeH	30S ribosome assembly GTPase	COG1161	J	Translation, ribosomal structure and biogenesis	PTHR46434:SF1
T303_08945	HAD family hydrolase	K07015	K07015	uncharacterized protein	COG2179	R	General function prediction only	PTHR19288:SF25
T303_08950	multidrug DMT transporter permease	not assigned	not assigned	not assigned	COG5006	E	Amino acid transport and metabolism	PTHR22911:SF74
T303_08955	hypothetical protein	not assigned	not assigned	not assigned	not assigned	not assigned	not assigned	NOHIT
T303_08960	aspartyl/glutamyl-tRNA amidotransferase subunit B	K02434	gatB, PET112	aspartyl-tRNA(Asn)/glutamyl-tRNA(Gln) amidotransferase subunit B [EC:6.3.5.6 6.3.5.7]	COG0064	J	Translation, ribosomal structure and biogenesis	PTHR11659:SF0
T303_08965	aspartyl/glutamyl-tRNA amidotransferase subunit A	K02433	gatA, QRSL1	aspartyl-tRNA(Asn)/glutamyl-tRNA(Gln) amidotransferase subunit A [EC:6.3.5.6 6.3.5.7]	COG0154	J	Translation, ribosomal structure and biogenesis	PTHR11895:SF7
T303_08970	glutamyl-tRNA amidotransferase subunit C	K02435	gatC, GATC	aspartyl-tRNA(Asn)/glutamyl-tRNA(Gln) amidotransferase subunit C [EC:6.3.5.6 6.3.5.7]	COG0721	J	Translation, ribosomal structure and biogenesis	PTHR15004:SF0
T303_08975	glycosyltransferase	not assigned	not assigned	not assigned	not assigned	not assigned	not assigned	NOHIT
T303_08980	6-phospho-beta-glucosidase	K01223	E3.2.1.86B, bglA	6-phospho-beta-glucosidase [EC:3.2.1.86]	COG2723	G	Carbohydrate transport and metabolism	PTHR10353:SF122
T303_08985	hypothetical protein	not assigned	not assigned	not assigned	not assigned	not assigned	not assigned	NOHIT
T303_08990	methionine sulfoxide reductase A	K07304	msrA	peptide-methionine (S)-S-oxide reductase [EC:1.8.4.11]	COG0225	O	Posttranslational modification, protein turnover, chaperones	PTHR43774:SF1
T303_08995	O-sialoglycoprotein endopeptidase	K02073	metQ	D-methionine transport system substrate-binding protein	COG1464	P	Inorganic ion transport and metabolism	PTHR30429:SF3
T303_09000	isochorismatase	not assigned	not assigned	not assigned	COG1335	H,R	Coenzyme transport and metabolism	PTHR43540
T303_09005	GTP-sensing transcriptional pleiotropic repressor codY	K03706	codY	transcriptional pleiotropic repressor	COG4465	K	Transcription	PTHR40062:SF1
T303_09010	aminotransferase AlaT	K14260	alaA	alanine-synthesizing transaminase [EC:2.6.1.66 2.6.1.2]	COG0436	E	Amino acid transport and metabolism	PTHR43488:SF2
T303_09015	universal stress protein UspA	not assigned	not assigned	not assigned	COG0589	T	Signal transduction mechanisms	PTHR46268
T303_09025	hypothetical protein	not assigned	not assigned	not assigned	not assigned	not assigned	not assigned	NOHIT
T303_09030	membrane protein	not assigned	not assigned	not assigned	not assigned	not assigned	not assigned	NOHIT
T303_09035	pyruvate formate lyase-activating protein	K04069	pflA, pflC, pflE	pyruvate formate lyase activating enzyme [EC:1.97.1.4]	COG1180	O	Posttranslational modification, protein turnover, chaperones	PTHR30352:SF5
T303_09040	putative transport protein	K03699	tlyC	putative hemolysin	COG1253	R	General function prediction only	PTHR22777:SF3
T303_09045	molybdenum ABC transporter ATP-binding protein	K02013	ABC.FEV.A	iron complex transport system ATP-binding protein [EC:3.6.3.34]	COG1119	P	Inorganic ion transport and metabolism	PTHR43553:SF3
T303_09050	sodium:hydrogen antiporter	K03316	TC.CPA1	monovalent cation:H+ antiporter, CPA1 family	COG0025	P	Inorganic ion transport and metabolism	PTHR10110:SF86
T303_09055	hypothetical protein	not assigned	not assigned	not assigned	not assigned	not assigned	not assigned	NOHIT
T303_09060	SAM-dependent methyltransferase	not assigned	not assigned	not assigned	not assigned	not assigned	not assigned	PTHR35276:SF1
T303_09065	Fe-S oxidoreductase	K07139	K07139	uncharacterized protein	COG1242	R	General function prediction only	PTHR11135:SF1
T303_09070	peptidase S16	K07177	K07177	Lon-like protease	COG3480	T	Signal transduction mechanisms	PTHR10046:SF48
T303_09075	phosphopantetheine adenylyltransferase	K00954	E2.7.7.3A, coaD, kdtB	pantetheine-phosphate adenylyltransferase [EC:2.7.7.3]	COG0669	H	Coenzyme transport and metabolism	PTHR21342:SF1
T303_09080	rRNA methyltransferase	not assigned	not assigned	not assigned	COG0742	J	Translation, ribosomal structure and biogenesis	PTHR43542:SF1
T303_09085	thioredoxin reductase	K00384	trxB, TRR	thioredoxin reductase (NADPH) [EC:1.8.1.9]	COG0492	O	Posttranslational modification, protein turnover, chaperones	PTHR42863:SF6
T303_09090	thioredoxin	not assigned	not assigned	not assigned	not assigned	not assigned	not assigned	NOHIT
T303_09095	amino acid ABC transporter ATP-binding protein	K02028	ABC.PA.A	polar amino acid transport system ATP-binding protein [EC:7.4.2.1]	COG1126	E	Amino acid transport and metabolism	PTHR43166:SF21
T303_09100	amino acid ABC transporter permease	K02029	ABC.PA.P	polar amino acid transport system permease protein	COG0765	E	Amino acid transport and metabolism	PTHR30614:SF16
T303_09105	amino acid ABC transporter substrate-binding protein	K02030	ABC.PA.S	polar amino acid transport system substrate-binding protein	COG0834	E,T	Amino acid transport and metabolism	PTHR35936:SF16
T303_09110	hypothetical protein	not assigned	not assigned	not assigned	not assigned	not assigned	not assigned	NOHIT
T303_09115	DNA polymerase IV	K02346	dinB	DNA polymerase IV [EC:2.7.7.7]	COG0389	L	Replication, recombination and repair	PTHR11076:SF33
T303_09120	formate acetyltransferase	K00656	E2.3.1.54, pflD	formate C-acetyltransferase [EC:2.3.1.54]	COG1882	C	Energy production and conversion	PTHR30191
T303_09125	carbonate dehydratase	K01674	cah	carbonic anhydrase [EC:4.2.1.1]	COG3338	P	Inorganic ion transport and metabolism	PTHR18952:SF131
T303_09130	GNAT family acetyltransferase	not assigned	not assigned	not assigned	COG2153	R	General function prediction only	PTHR13355:SF8
T303_09135	type I restriction endonuclease subunit S	K01154	hsdS	type I restriction enzyme, S subunit [EC:3.1.21.3]	not assigned	not assigned	not assigned	PTHR30408:SF9
T303_09140	hypothetical protein	not assigned	not assigned	not assigned	not assigned	not assigned	not assigned	NOHIT
T303_09145	ABC transporter permease	K02069	ABC.X2.P	putative ABC transport system permease protein	COG0390	P	Inorganic ion transport and metabolism	PTHR30028:SF0
T303_09150	putrescine/spermidine ABC transporter ATP-binding protein	K02068	ABC.X2.A	putative ABC transport system ATP-binding protein	COG4619	P	Inorganic ion transport and metabolism	PTHR43423:SF2
T303_09160	beta-lactamase	not assigned	not assigned	not assigned	COG1680	V	Defense mechanisms	PTHR43645:SF4
T303_09165	C3-degrading proteinase	not assigned	not assigned	not assigned	not assigned	not assigned	not assigned	PTHR43279:SF1
T303_09170	CAAX amino terminal protease	K07052	K07052	uncharacterized protein	not assigned	not assigned	not assigned	PTHR43592
T303_09175	glycerol uptake permease	K02440	GLPF	glycerol uptake facilitator protein	COG0580	G	Carbohydrate transport and metabolism	PTHR43829:SF9
T303_09180	X-prolyl-dipeptidyl aminopeptidase	K01281	pepX	X-Pro dipeptidyl-peptidase [EC:3.4.14.11]	COG2936	R	General function prediction only	NOHIT
T303_09185	putative bacteriocin self-immunity protein	not assigned	not assigned	not assigned	not assigned	not assigned	not assigned	NOHIT
T303_09195	peptidase	not assigned	not assigned	not assigned	not assigned	not assigned	not assigned	NOHIT
T303_09205	transposase IS3	not assigned	not assigned	not assigned	COG2963	X	Mobilome - prophages, transposons	PTHR33795:SF1
T303_09210	transposase IS3	not assigned	not assigned	not assigned	COG2801	X	Mobilome - prophages, transposons	PTHR42648:SF3
T303_09220	pore-forming peptide bacteriocin	not assigned	not assigned	not assigned	not assigned	not assigned	not assigned	NOHIT
T303_09225	hypothetical protein	not assigned	not assigned	not assigned	not assigned	not assigned	not assigned	NOHIT
T303_09230	membrane protein	not assigned	not assigned	not assigned	not assigned	not assigned	not assigned	NOHIT
T303_09235	membrane protein	not assigned	not assigned	not assigned	not assigned	not assigned	not assigned	NOHIT
T303_09240	hypothetical protein	not assigned	not assigned	not assigned	not assigned	not assigned	not assigned	NOHIT
T303_09245	bacteriocin	not assigned	not assigned	not assigned	not assigned	not assigned	not assigned	NOHIT
T303_09250	bacteriocin BlpI family protein	not assigned	not assigned	not assigned	not assigned	not assigned	not assigned	NOHIT
T303_09255	bacteriocin	not assigned	not assigned	not assigned	not assigned	not assigned	not assigned	NOHIT
T303_09260	response regulator-like protein	K07707	agrA, blpR, fsrA	two-component system, LytTR family, response regulatorAgrA	COG3279	T,K	Signal transduction mechanisms	PTHR43412:SF3
T303_09265	sensor histidine kinase	K07706	agrC, blpH, fsrC	two-component system, LytTR family, sensor histidine kinase AgrC [EC:2.7.13.3]	COG2972	T	Signal transduction mechanisms	PTHR40448:SF1
T303_09270	signal peptidase	K20343	blpC	peptide pheromone BlpC	not assigned	not assigned	not assigned	NOHIT
T303_09275	lactococcin A ABC transporter permease	K20345	blpB	membrane fusion protein, peptide pheromone/bacteriocin exporter	not assigned	not assigned	not assigned	PTHR30386:SF0
T303_09285	hypothetical protein	not assigned	not assigned	not assigned	not assigned	not assigned	not assigned	NOHIT
T303_09290	hypothetical protein	not assigned	not assigned	not assigned	not assigned	not assigned	not assigned	NOHIT
T303_09295	multidrug ABC transporter ATP-binding protein	K18890	mdlB, smdB	ATP-binding cassette, subfamily B, multidrug efflux pump	COG1132	V	Defense mechanisms	PTHR24221:SF430
T303_09300	multidrug ABC transporter ATP-binding protein	K18889	mdlA, smdA	ATP-binding cassette, subfamily B, multidrug efflux pump	COG1132	V	Defense mechanisms	PTHR24221:SF300
T303_09310	glycopeptide antibiotics resistance protein	not assigned	not assigned	not assigned	not assigned	not assigned	not assigned	PTHR36834:SF1
T303_09315	23S rRNA methyltransferase	K06941	rlmN	23S rRNA (adenine2503-C2)-methyltransferase [EC:2.1.1.192]	COG0820	J	Translation, ribosomal structure and biogenesis	PTHR30544
T303_09320	transcriptional regulator	not assigned	not assigned	not assigned	COG4470	S	Function unknown	NOHIT
T303_09325	phosphoesterase	not assigned	not assigned	not assigned	COG0737	F,V	Nucleotide transport and metabolism	PTHR11575:SF23
T303_09335	DEAD/DEAH box helicase	K18692	cshB	ATP-dependent RNA helicase CshB [EC:3.6.4.13]	COG0513	L	Replication, recombination and repair	PTHR24031:SF586
T303_09340	phospho-N-acetylmuramoyl-pentapeptide-transferase	K01000	mraY	phospho-N-acetylmuramoyl-pentapeptide-transferase [EC:2.7.8.13]	COG0472	M	Cell wall/membrane/envelope biogenesis	PTHR22926:SF5
T303_09345	penicillin-binding protein 2X	K12556	pbp2X	penicillin-binding protein 2X	COG0768	M,D	Cell wall/membrane/envelope biogenesis	PTHR30627:SF1
T303_09350	cell division protein FtsL	not assigned	not assigned	not assigned	COG4839	D	Cell cycle control, cell division, chromosome partitioning	PTHR40027:SF1
T303_09355	16S rRNA methyltransferase	K03438	mraW, rsmH	16S rRNA (cytosine1402-N4)-methyltransferase [EC:2.1.1.199]	COG0275	J	Translation, ribosomal structure and biogenesis	PTHR11265
T303_09365	hypothetical protein	not assigned	not assigned	not assigned	not assigned	not assigned	not assigned	NOHIT
T303_09370	hypothetical protein	not assigned	not assigned	not assigned	COG3152	S	Function unknown	PTHR34980:SF2
T303_09375	membrane protein	not assigned	not assigned	not assigned	not assigned	not assigned	not assigned	NOHIT
T303_09380	gamma-glutamyl phosphate reductase	K00147	proA	glutamate-5-semialdehyde dehydrogenase [EC:1.2.1.41]	COG0014	E	Amino acid transport and metabolism	PTHR11063:SF8
T303_09385	gamma-glutamyl kinase	K00931	proB	glutamate 5-kinase [EC:2.7.2.11]	COG0263	E	Amino acid transport and metabolism	PTHR43654:SF3
T303_09390	ABC transporter permease	K01992	ABC-2.P	ABC-2 type transport system permease protein	not assigned	not assigned	not assigned	NOHIT
T303_09395	3-dehydroquinate dehydratase	K01990	ABC-2.A	ABC-2 type transport system ATP-binding protein	COG1131	V	Defense mechanisms	PTHR42939
T303_09400	integral membrane protein	K07150	K07150	uncharacterized protein	COG1811	S	Function unknown	PTHR36111:SF2
T303_09405	ATP-dependent helicase	K16898	addA	ATP-dependent helicase/nuclease subunit A [EC:3.1.-.- 3.6.4.12]	COG1074	L	Replication, recombination and repair	PTHR11070:SF48
T303_09410	ATP-dependent helicase	K16899	addB	ATP-dependent helicase/nuclease subunit B [EC:3.1.-.- 3.6.4.12]	COG3857	L	Replication, recombination and repair	PTHR30591:SF1
T303_09415	hypothetical protein	not assigned	not assigned	not assigned	not assigned	not assigned	not assigned	NOHIT
T303_09420	DNA-binding protein	not assigned	not assigned	not assigned	not assigned	not assigned	not assigned	PTHR37299:SF1
T303_09425	membrane protein	not assigned	not assigned	not assigned	not assigned	not assigned	not assigned	NOHIT
T303_09430	hypothetical protein	not assigned	not assigned	not assigned	not assigned	not assigned	not assigned	NOHIT
T303_09435	hisitidine kinase	not assigned	not assigned	not assigned	not assigned	not assigned	not assigned	NOHIT
T303_09445	haloacid dehalogenase	not assigned	not assigned	not assigned	COG4696	R	General function prediction only	PTHR10000:SF25
T303_09450	asparaginase	K01424	E3.5.1.1, ansA, ansB	L-asparaginase [EC:3.5.1.1]	COG0252	U,J	Intracellular trafficking, secretion, and vesicular transport	PTHR43828:SF3
T303_09455	hypothetical protein	not assigned	not assigned	not assigned	not assigned	not assigned	not assigned	NOHIT
T303_09460	ATP-dependent DNA helicase	K03655	recG	ATP-dependent DNA helicase RecG [EC:3.6.4.12]	COG1200	L	Replication, recombination and repair	PTHR24031:SF249
T303_09465	alanine racemase	K01775	alr	alanine racemase [EC:5.1.1.1]	COG0787	M	Cell wall/membrane/envelope biogenesis	PTHR30511:SF0
T303_09470	4'-phosphopantetheinyl transferase	K00997	acpS	holo-[acyl-carrier protein] synthase [EC:2.7.8.7]	COG0736	I	Lipid transport and metabolism	PTHR12215:SF15
T303_09475	phospho-2-dehydro-3-deoxyheptonate aldolase	K01626	E2.5.1.54, aroF, aroG, aroH	3-deoxy-7-phosphoheptulonate synthase [EC:2.5.1.54]	COG0722	E	Amino acid transport and metabolism	PTHR21225:SF10
T303_09480	phospho-2-dehydro-3-deoxyheptonate aldolase	K01626	E2.5.1.54, aroF, aroG, aroH	3-deoxy-7-phosphoheptulonate synthase [EC:2.5.1.54]	COG0722	E	Amino acid transport and metabolism	PTHR21225:SF10
T303_09485	preprotein translocase subunit SecA	K03070	secA	preprotein translocase subunit SecA	COG0653	U	Intracellular trafficking, secretion, and vesicular transport	PTHR30612
T303_09495	mannose-6-phosphate isomerase	K01809	manA, MPI	mannose-6-phosphate isomerase [EC:5.3.1.8]	COG1482	G	Carbohydrate transport and metabolism	PTHR42742:SF3
T303_09500	fructokinase	K00847	E2.7.1.4, scrK	fructokinase [EC:2.7.1.4]	COG1940	G,K	Carbohydrate transport and metabolism	PTHR42742:SF5
T303_09505	PTS sucrose transporter subunit IIABC	K02808	PTS-Scr-EIIA, scrA, ptsS	PTS system, sucrose-specific IIA component [EC:2.7.1.211]	COG1263	G	Carbohydrate transport and metabolism	PTHR30175:SF7
T303_09510	sucrose-6-phosphate hydrolase	K01193	INV, sacA	beta-fructofuranosidase [EC:3.2.1.26]	COG1621	G	Carbohydrate transport and metabolism	PTHR43101:SF1
T303_09515	sucrose operon repressor	K03484	scrR	LacI family transcriptional regulator, sucrose operon repressor	COG1609	K	Transcription	PTHR30146:SF95
T303_09520	transcription antitermination factor NusB	K03625	nusB	N utilization substance protein B	COG0781	K	Transcription	PTHR11078:SF3
T303_09525	hypothetical protein	not assigned	not assigned	not assigned	COG1302	S	Function unknown	PTHR34297:SF1
T303_09530	elongation factor P	K02356	efp	elongation factor P	COG0231	J	Translation, ribosomal structure and biogenesis	PTHR30053:SF1
T303_09535	CMP deaminase	K01493	comEB	dCMP deaminase [EC:3.5.4.12]	COG2131	F	Nucleotide transport and metabolism	PTHR11086:SF18
T303_09540	X-Pro aminopeptidase	K01262	pepP	Xaa-Pro aminopeptidase [EC:3.4.11.9]	COG0006	E	Amino acid transport and metabolism	PTHR46112:SF3
T303_09545	membrane protein	not assigned	not assigned	not assigned	not assigned	not assigned	not assigned	NOHIT
T303_09555	hypothetical protein	not assigned	not assigned	not assigned	not assigned	not assigned	not assigned	NOHIT
T303_09560	membrane protein	not assigned	not assigned	not assigned	not assigned	not assigned	not assigned	NOHIT
T303_09565	excinuclease ABC subunit A	K03701	uvrA	excinuclease ABC subunit A	COG0178	L	Replication, recombination and repair	PTHR43152:SF4
T303_09570	magnesium transporter	K03284	corA	magnesium transporter	COG0598	P	Inorganic ion transport and metabolism	PTHR47891:SF2
T303_09575	membrane protein	not assigned	not assigned	not assigned	COG4858	S	Function unknown	NOHIT
T303_09580	hypothetical protein	not assigned	not assigned	not assigned	not assigned	not assigned	not assigned	NOHIT
T303_09585	30S ribosomal protein S18	K02963	RP-S18, MRPS18, rpsR	small subunit ribosomal protein S18	COG0238	J	Translation, ribosomal structure and biogenesis	PTHR13479:SF40
T303_09590	single-stranded DNA-binding protein	K03111	ssb	single-strand DNA-binding protein	COG0629	L	Replication, recombination and repair	PTHR10302:SF10
T303_09595	30S ribosomal protein S6	K02990	RP-S6, MRPS6, rpsF	small subunit ribosomal protein S6	COG0360	J	Translation, ribosomal structure and biogenesis	PTHR21011:SF1
T303_09600	hypothetical protein	not assigned	not assigned	not assigned	not assigned	not assigned	not assigned	NOHIT
T303_09605	adenine glycosylase	K03575	mutY	A/G-specific adenine glycosylase [EC:3.2.2.31]	COG1194	L	Replication, recombination and repair	PTHR42944:SF3
T303_09610	hypothetical protein	not assigned	not assigned	not assigned	not assigned	not assigned	not assigned	NOHIT
T303_09615	hypothetical protein	not assigned	not assigned	not assigned	not assigned	not assigned	not assigned	NOHIT
T303_09620	hypothetical protein	not assigned	not assigned	not assigned	not assigned	not assigned	not assigned	NOHIT
T303_09625	hypothetical protein	not assigned	not assigned	not assigned	not assigned	not assigned	not assigned	NOHIT
T303_09630	hypothetical protein	not assigned	not assigned	not assigned	not assigned	not assigned	not assigned	NOHIT
T303_09635	DNA polymerase I	K02335	polA	DNA polymerase I [EC:2.7.7.7]	COG0749	L	Replication, recombination and repair	PTHR10133:SF27
T303_09640	DNA mismatch repair protein MutS	K07456	mutS2	DNA mismatch repair protein MutS2	COG1193	L	Replication, recombination and repair	PTHR11361:SF14
T303_09645	membrane ancor connecting MutS2 with cell-division Z-ring	not assigned	not assigned	not assigned	COG1286	S	Function unknown	PTHR37306:SF1
T303_09650	hypothetical protein	not assigned	not assigned	not assigned	not assigned	not assigned	not assigned	NOHIT
T303_09655	ribonuclease HIII	K03471	rnhC	ribonuclease HIII [EC:3.1.26.4]	COG1039	L	Replication, recombination and repair	PTHR10954:SF12
T303_09660	signal peptidase	K03100	lepB	signal peptidase I [EC:3.4.21.89]	not assigned	not assigned	not assigned	PTHR43390:SF1
T303_09665	ATP-dependent DNA helicase, RecD/TraA family	K03581	recD	exodeoxyribonuclease V alpha subunit [EC:3.1.11.5]	COG0507	L	Replication, recombination and repair	PTHR43788:SF6
T303_09670	branched-chain amino acid transporter	not assigned	not assigned	not assigned	COG4392	E	Amino acid transport and metabolism	NOHIT
T303_09675	branched-chain amino acid ABC transporter permease	not assigned	not assigned	not assigned	COG1296	E	Amino acid transport and metabolism	PTHR34979:SF1
T303_09680	glycoprotease family protein	K01409	KAE1, tsaD, QRI7	N6-L-threonylcarbamoyladenine synthase [EC:2.3.1.234]	COG0533	J	Translation, ribosomal structure and biogenesis	PTHR11735:SF6
T303_09685	alanine acetyltransferase	K03789	rimI	[ribosomal protein S18]-alanine N-acetyltransferase [EC:2.3.1.266]	COG0456	J	Translation, ribosomal structure and biogenesis	PTHR43420:SF16
T303_09690	inactive metal-dependent protease-like protein, putative molecular chaperone	not assigned	not assigned	not assigned	COG1214	J	Translation, ribosomal structure and biogenesis	PTHR11735:SF11
T303_09695	hypothetical protein	not assigned	not assigned	not assigned	COG5503	K,V	Transcription	NOHIT
T303_09700	mRNA degradation ribonuclease J1/J2, metallo-beta-lactamase superfamily enzyme	K12574	rnj	ribonuclease J [EC:3.1.-.-]	COG0595	J	Translation, ribosomal structure and biogenesis	PTHR43694:SF4
T303_09705	hydrolase	not assigned	not assigned	not assigned	not assigned	not assigned	not assigned	NOHIT
T303_09710	glutamine synthetase	K01915	glnA, GLUL	glutamine synthetase [EC:6.3.1.2]	COG0174	E	Amino acid transport and metabolism	PTHR43785:SF1
T303_09715	repressor of the glutamine synthetase, MerR family transcriptional regulator	K03713	glnR	MerR family transcriptional regulator, glutamine synthetase repressor	COG0789	K	Transcription	PTHR30204:SF65
T303_09720	membrane protein	not assigned	not assigned	not assigned	not assigned	not assigned	not assigned	PTHR30509:SF9
T303_09725	transposase	not assigned	not assigned	not assigned	not assigned	not assigned	not assigned	NOHIT
T303_09735	phosphoglycerate kinase	K00927	PGK, pgk	phosphoglycerate kinase [EC:2.7.2.3]	COG0126	G	Carbohydrate transport and metabolism	PTHR11406:SF23
T303_09740	transposase	K07491	K07491	putative transposase	not assigned	not assigned	not assigned	PTHR33360
T303_09750	transposase IS861	K07497	K07497	putative transposase	not assigned	not assigned	not assigned	PTHR42648:SF3
T303_09755	transposase	K07497	K07497	putative transposase	not assigned	not assigned	not assigned	PTHR42648:SF3
T303_09765	glyceraldehyde-3-phosphate dehydrogenase	K00134	GAPDH, gapA	glyceraldehyde 3-phosphate dehydrogenase [EC:1.2.1.12]	COG0057	G	Carbohydrate transport and metabolism	PTHR43148:SF6
T303_09770	elongation factor P	K02355	fusA, GFM, EFG	elongation factor G	COG0480	J	Translation, ribosomal structure and biogenesis	PTHR43261
T303_09775	30S ribosomal protein S7	K02992	RP-S7, MRPS7, rpsG	small subunit ribosomal protein S7	COG0049	J	Translation, ribosomal structure and biogenesis	PTHR11205:SF19
T303_09780	30S ribosomal protein S12	K02950	RP-S12, MRPS12, rpsL	small subunit ribosomal protein S12	COG0048	J	Translation, ribosomal structure and biogenesis	PTHR11652:SF1
T303_09785	purine operon repressor	K09685	purR	purine operon repressor	COG0503	F	Nucleotide transport and metabolism	PTHR43864:SF2
T303_09790	3'-5' exoribonuclease	K03698	cbf, cbf1	3'-5' exoribonuclease [EC:3.1.-.-]	COG3481	J	Translation, ribosomal structure and biogenesis	PTHR37294:SF1
T303_09795	DNA polymerase V	K09760	rmuC	DNA recombination protein RmuC	COG1322	L	Replication, recombination and repair	PTHR30563:SF0
T303_09800	thiamine pyrophosphokinase	K00949	thiN, TPK1, THI80	thiamine pyrophosphokinase [EC:2.7.6.2]	COG1564	H	Coenzyme transport and metabolism	PTHR41299:SF1
T303_09805	ribulose-phosphate 3-epimerase	K01783	rpe, RPE	ribulose-phosphate 3-epimerase [EC:5.1.3.1]	COG0036	G	Carbohydrate transport and metabolism	PTHR11749:SF7
T303_09810	GTPase A	K06949	rsgA, engC	ribosome biogenesis GTPase / thiamine phosphate phosphatase [EC:3.6.1.- 3.1.3.100]	COG1162	J	Translation, ribosomal structure and biogenesis	PTHR32120:SF9
T303_09815	tRNA Leu	K14228	tRNA-Leu	tRNA Leu	not assigned	not assigned	not assigned	NOHIT
T303_09820	16S rRNA methyltransferase	K02528	ksgA	16S rRNA (adenine1518-N6/adenine1519-N6)-dimethyltransferase [EC:2.1.1.182]	COG0030	J	Translation, ribosomal structure and biogenesis	PTHR11727:SF7
T303_09825	DNA primase	K05985	rnmV	ribonuclease M5 [EC:3.1.26.8]	COG1658	J	Translation, ribosomal structure and biogenesis	PTHR39156:SF1
T303_09830	TatD family hydrolase	K03424	tatD	TatD DNase family protein [EC:3.1.21.-]	COG0084	N	Cell motility	PTHR46124:SF2
T303_09835	CoA-binding protein	K06929	K06929	uncharacterized protein	COG1832	R	General function prediction only	PTHR33303
T303_09840	thioredoxin	K03671	trxA	thioredoxin 1	not assigned	not assigned	not assigned	PTHR45663:SF7
T303_09845	Appr-1-p processing protein	not assigned	not assigned	not assigned	COG2110	J	Translation, ribosomal structure and biogenesis	PTHR11106
T303_09855	bacteriocin transport accessory protein	not assigned	not assigned	not assigned	COG0526	O	Posttranslational modification, protein turnover, chaperones	PTHR10438:SF301
T303_09860	tRNA Asn	K14220	tRNA-Asn	tRNA Asn	not assigned	not assigned	not assigned	NOHIT
T303_09865	5S ribosomal RNA	K01985	5SrRNA, rrf	5S ribosomal RNA	not assigned	not assigned	not assigned	NOHIT
T303_09870	23S ribosomal RNA	K01980	23SrRNA, rrl	23S ribosomal RNA	not assigned	not assigned	not assigned	NOHIT
T303_09875	tRNA Ala	K14218	tRNA-Ala	tRNA Ala	not assigned	not assigned	not assigned	NOHIT
T303_09880	16S ribosomal RNA	K01977	16SrRNA, rrs	16S ribosomal RNA	not assigned	not assigned	not assigned	NOHIT
T303_09885	hypothetical protein	not assigned	not assigned	not assigned	not assigned	not assigned	not assigned	NOHIT
T303_09890	queuine tRNA-ribosyltransferase	K00773	tgt, QTRT1	queuine tRNA-ribosyltransferase [EC:2.4.2.29]	COG0343	J	Translation, ribosomal structure and biogenesis	PTHR46499:SF1
T303_09895	transposase IS200	K07491	K07491	putative transposase	not assigned	not assigned	not assigned	PTHR33360:SF2
T303_09900	50S ribosomal protein L34	K02914	RP-L34, MRPL34, rpmH	large subunit ribosomal protein L34	not assigned	not assigned	not assigned	PTHR14503:SF4
T303_09905	transposase IS1193	not assigned	not assigned	not assigned	COG3464	X	Mobilome - prophages, transposons	PTHR33498:SF1

## Sheet: Cd2 vs Cd1
									Fold change (ratio)							One sample t-test							Volcano plot
Locus_tag	GenBank Accession	N	Unused	Total	%Cov	%Cov(50)	%Cov(95)	Peptides(95%)	114:113	115:113	114:117	115:117	Fold change (mean)	Fold change (median)	Fold change (SD)	P-value (two tailed) µ=1.3	Significant? µ=1.3	P-value (two tailed) µ=0.7692	Significant? µ=0.7692	P-value (two tailed) µ=1	Significant? µ=1	DEPs (based on µ=1.3 & µ=0.7692)	Locus_tag	Log2_FCmedian	MinusLog10_pvalue	Label	GenBank_annotation	COG description
T303_05590	AIC24366	131	17.36	17.88	48.85	19.81	16.54	12	0.691831	0.666807	0.737904	0.698232	0.698694	0.695032	0.029448	< 0.0001	Yes	0.0173	Yes	0.0003	Yes	Down	T303_05590	-0.524849	3.52288	Down	signal recognition particle protein Srp54	Intracellular trafficking, secretion, and vesicular transport
T303_07405	AIC24666	186	13.5	14.18	44.67	35.16	20.17	11	0.717794	0.625173	0.737904	0.660693	0.685391	0.689244	0.051781	0.0002	Yes	0.048	Yes	0.0012	Yes	Down	T303_07405	-0.536914	2.92082	Down	phenylalanyl-tRNA synthase subunit alpha	Translation, ribosomal structure and biogenesis
T303_01735	AIC23729	196	12.87	13.63	86.15	53.08	40	11	0.619441	0.679204	0.591562	0.685488	0.643924	0.649322	0.0458747	< 0.0001	Yes	0.0121	Yes	0.0006	Yes	Down	T303_01735	-0.622993	3.22185	Down	30S ribosomal protein S9	Translation, ribosomal structure and biogenesis
T303_09775	AIC25080	53	31.63	31.9	69.87	66.03	63.46	27	0.642688	0.691831	0.591562	0.625173	0.637813	0.63393	0.0417958	< 0.0001	Yes	0.0081	Yes	0.0004	Yes	Down	T303_09775	-0.657604	3.39794	Down	30S ribosomal protein S7	Translation, ribosomal structure and biogenesis
T303_07275	AIC24647	389	4.53	4.88	50.64	15.6	5.627	3	0.666807	0.625173	0.636796	0.570164	0.624735	0.630984	0.0403883	< 0.0001	Yes	0.0056	Yes	0.0003	Yes	Down	T303_07275	-0.664324	3.52288	Down	isocitrate dehydrogenase	Energy production and conversion
T303_00530	AIC23560	130	17.47	19.87	64.38	47.26	47.26	14	0.608135	0.666807	0.570164	0.648634	0.623435	0.628385	0.0431586	< 0.0001	Yes	0.0066	Yes	0.0004	Yes	Down	T303_00530	-0.67028	3.39794	Down	50S ribosomal protein L15	Translation, ribosomal structure and biogenesis
T303_07240	AIC24640	290	8.08	8.1	38.39	22.75	20.85	5	0.666807	0.711214	0.580764	0.586138	0.636231	0.626473	0.0636215	0.0002	Yes	0.0249	Yes	0.0014	Yes	Down	T303_07240	-0.674677	2.85387	Down	uridine/cytidine kinase	Nucleotide transport and metabolism
T303_01625	AIC23709	49	33.08	33.47	53.18	46.82	43.06	26	0.704693	0.679204	0.564937	0.554626	0.625865	0.62207	0.0771279	0.0004	Yes	0.0339	Yes	0.0023	Yes	Down	T303_01625	-0.68485	2.63827	Down	elongation factor Ts	Translation, ribosomal structure and biogenesis
T303_02860	AIC23916	25	41.87	42.09	62.14	27.78	21.53	24	0.642688	0.642688	0.570164	0.597035	0.613144	0.619861	0.0358348	< 0.0001	Yes	0.0032	Yes	0.0002	Yes	Down	T303_02860	-0.689982	3.69897	Down	translation initiation factor IF-2	Translation, ribosomal structure and biogenesis
T303_04850	AIC24249	194	13.03	13.14	47.2	25.78	20.81	10	0.549541	0.654636	0.57544	0.660693	0.610078	0.615038	0.0560116	0.0001	Yes	0.0108	Yes	0.0008	Yes	Down	T303_04850	-0.701253	3.09691	Down	glucokinase	Carbohydrate transport and metabolism
T303_00580	AIC23570	106	20.33	22.33	75.58	74.42	74.42	16	0.698232	0.666807	0.554626	0.519996	0.609915	0.610716	0.0859825	0.0005	Yes	0.0342	Yes	0.0028	Yes	Down	T303_00580	-0.711426	2.55284	Down	30S ribosomal protein S17	Translation, ribosomal structure and biogenesis
T303_04855	AIC24250	129	17.52	18.4	40.91	20.94	16.4	14	0.554626	0.428549	0.679204	0.619441	0.570455	0.587033	0.107415	0.0009	Yes	0.0343	Yes	0.0041	Yes	Down	T303_04855	-0.768486	2.38722	Down	GTP-binding protein	Signal transduction mechanisms
T303_05295	AIC24325	126	17.64	17.87	58.04	29.02	20.76	13	0.717794	0.549541	0.619441	0.534564	0.605335	0.584491	0.0836013	0.0005	Yes	0.0295	Yes	0.0025	Yes	Down	T303_05295	-0.774747	2.60206	Down	asparaginyl-tRNA synthase	Translation, ribosomal structure and biogenesis
T303_04605	AIC24209	377	4.87	4.94	25.57	15.21	13.27	4	0.654636	0.654636	0.47863	0.47863	0.566633	0.566633	0.101617	0.0007	Yes	0.0283	Yes	0.0034	Yes	Down	T303_04605	-0.819513	2.46852	Down	peptidase family U32	Posttranslational modification, protein turnover, chaperones
T303_07285	AIC24649	279	8.59	10.33	39.57	17.25	8.906	12	0.619441	0.505825	0.613762	0.505825	0.561213	0.559793	0.0639991	0.0002	Yes	0.0074	Yes	0.0008	Yes	Down	T303_07285	-0.837034	3.09691	Down	aconitate hydratase	Energy production and conversion
T303_01935	AIC23759	16	54.85	54.89	59.48	48.71	46.84	36	0.586138	0.586138	0.510505	0.524807	0.551897	0.555473	0.0399669	< 0.0001	Yes	0.0017	Yes	0.0002	Yes	Down	T303_01935	-0.848212	3.69897	Down	trigger factor	Posttranslational modification, protein turnover, chaperones
T303_01380	AIC23683	73	26.88	27.38	53.81	42.38	32.86	15	0.564937	0.654636	0.505825	0.544503	0.567475	0.55472	0.0630661	0.0002	Yes	0.0077	Yes	0.0008	Yes	Down	T303_01380	-0.850169	3.09691	Down	phosphoribosylamine--glycine ligase	Nucleotide transport and metabolism
T303_02705	AIC23890	58	30.63	31.15	45.59	28.72	22.64	18	0.505825	0.597035	0.510505	0.554626	0.541998	0.532565	0.0427741	< 0.0001	Yes	0.0018	Yes	0.0002	Yes	Down	T303_02705	-0.90897	3.69897	Down	transketolase	Carbohydrate transport and metabolism
T303_07870	AIC24738	203	12.3	13.56	26.18	13.88	13.09	11	0.405508	0.554626	0.420727	0.586138	0.49175	0.487676	0.0919137	0.0004	Yes	0.0091	Yes	0.0016	Yes	Down	T303_07870	-1.036	2.79588	Down	PTS sugar transporter subunit IIA	Carbohydrate transport and metabolism
T303_08865	AIC24917	314	7.18	8.68	36.12	21.67	19.01	7	0.642688	0.440555	0.510505	0.461318	0.513766	0.485911	0.0908151	0.0004	Yes	0.0111	Yes	0.0017	Yes	Down	T303_08865	-1.04124	2.76955	Down	aminoglycoside phosphotransferase	Coenzyme transport and metabolism
T303_06855	AIC24572	188	13.43	13.78	65.9	52.49	36.4	15	0.405508	0.49204	0.469894	0.564937	0.483095	0.480967	0.0657572	0.0001	Yes	0.0032	Yes	0.0006	Yes	Down	T303_06855	-1.05599	3.22185	Down	translation factor (SUA5)	Translation, ribosomal structure and biogenesis
T303_03455	AIC25117	438	3.37	3.55	31.12	12.94	11.54	4	0.440555	0.539511	0.405509	0.515229	0.475201	0.477892	0.0627039	0.0001	Yes	0.0026	Yes	0.0005	Yes	Down	T303_03455	-1.06524	3.30103	Down	homoserine kinase	Amino acid transport and metabolism
T303_06055	AIC24448	316	7.13	7.4	51.38	21.1	17.43	5	0.496592	0.457088	0.501187	0.444631	0.474875	0.47684	0.028255	< 0.0001	Yes	0.0002	Yes	0.0001	Yes	Down	T303_06055	-1.06842	4	Down	PhoU family transcriptional regulator	Inorganic ion transport and metabolism
T303_01640	AIC23712	242	10.48	12.93	39.46	12.01	8.088	7	0.401791	0.554626	0.349945	0.539511	0.461468	0.470651	0.101271	0.0005	Yes	0.0089	Yes	0.0018	Yes	Down	T303_01640	-1.08727	2.74473	Down	ATP-dependent Clp protease ATP-binding protein	Posttranslational modification, protein turnover, chaperones
T303_08665	AIC24882	102	21.73	21.99	55.41	33.78	25.62	12	0.390841	0.724436	0.270396	0.465586	0.462815	0.428213	0.192058	0.0032	Yes	0.0497	Yes	0.0113	Yes	Down	T303_08665	-1.2236	1.94692	Down	RNA helicase	Replication, recombination and repair
T303_09710	AIC25071	44	35	37.37	57.46	48.46	38.38	28	0.383707	0.452898	0.398107	0.461318	0.424007	0.425502	0.0388227	< 0.0001	Yes	0.0004	Yes	0.0001	Yes	Down	T303_09710	-1.23276	4	Down	glutamine synthetase	Amino acid transport and metabolism
T303_01040	AIC23646	232	11.05	11.41	43.24	32.06	21.76	8	0.648634	0.394457	0.448745	0.270396	0.440558	0.421601	0.157526	0.0016	Yes	0.0251	Yes	0.0057	Yes	Down	T303_01040	-1.24605	2.24413	Down	tryptophanyl-tRNA synthase	Translation, ribosomal structure and biogenesis
T303_03725	AIC24058	237	10.88	11.3	35.08	24.59	19.06	9	0.440555	0.544503	0.291072	0.390841	0.416743	0.415698	0.105442	0.0005	Yes	0.0068	Yes	0.0016	Yes	Down	T303_03725	-1.26639	2.79588	Down	carbamoyl phosphate synthase small subunit	Amino acid transport and metabolism
T303_06580	AIC24522	413	4.09	4.12	39.47	12.46	7.122	3	0.30761	0.515229	0.310456	0.515229	0.412131	0.412842	0.119053	0.0007	Yes	0.0093	Yes	0.0022	Yes	Down	T303_06580	-1.27634	2.65758	Down	peptide chain release factor 2	Translation, ribosomal structure and biogenesis
T303_03080	AIC23948	415	4.07	4.12	36.49	36.49	8.108	3	0.210863	0.398107	0.42462	0.608135	0.410431	0.411363	0.16255	0.0016	Yes	0.0216	Yes	0.0054	Yes	Down	T303_03080	-1.28151	2.26761	Down	acyl carrier protein	Lipid transport and metabolism
T303_03260	AIC23980	10	65.91	66.06	79.17	69.08	63.82	62	0.444631	0.452898	0.334195	0.331131	0.390714	0.389413	0.0671277	0.0001	Yes	0.0015	Yes	0.0004	Yes	Down	T303_03260	-1.36063	3.39794	Down	glutamate dehydrogenase	Amino acid transport and metabolism
T303_06660	AIC24537	526	2.02	2.37	28.45	18.1	7.759	3	0.398107	0.57544	0.253513	0.37325	0.400078	0.385679	0.132862	0.0009	Yes	0.0115	Yes	0.0029	Yes	Down	T303_06660	-1.37453	2.5376	Down	glutamine ABC transporter permease	Amino acid transport and metabolism
T303_01405	AIC23685	36	37.73	38.22	77.08	55.79	49.54	32	0.328095	0.401791	0.349945	0.390841	0.367668	0.370393	0.0345516	< 0.0001	Yes	0.0002	Yes	0.0001	Yes	Down	T303_01405	-1.43287	4	Down	adenylosuccinate lyase	Nucleotide transport and metabolism
T303_01355	AIC23680	30	40.16	42.62	58.27	42.29	37.59	35	0.469894	0.369828	0.349945	0.283139	0.368202	0.359887	0.0772721	0.0002	Yes	0.0019	Yes	0.0005	Yes	Down	T303_01355	-1.47439	3.30103	Down	purine biosynthesis protein purH	Nucleotide transport and metabolism
T303_01335	AIC23676	4	85.74	86.13	54.28	38.51	29.38	58	0.353183	0.457088	0.275423	0.359749	0.361361	0.356466	0.0744279	0.0001	Yes	0.0016	Yes	0.0004	Yes	Down	T303_01335	-1.48816	3.39794	Down	phosphoribosylformylglycinamidine synthase	Nucleotide transport and metabolism
T303_00290	AIC23530	26	41.79	41.8	57.06	56.47	45.59	44	0.515229	0.325087	0.387258	0.265461	0.373259	0.356172	0.106915	0.0004	Yes	0.0051	Yes	0.0013	Yes	Down	T303_00290	-1.48935	2.88606	Down	ketol-acid reductoisomerase	Amino acid transport and metabolism
T303_01820	AIC23742	183	13.83	14.44	42.95	23.04	15.66	8	0.483059	0.363078	0.343558	0.258226	0.36198	0.353318	0.0926742	0.0003	Yes	0.0031	Yes	0.0008	Yes	Down	T303_01820	-1.50096	3.09691	Down	hypothetical protein	Cell cycle control, cell division, chromosome partitioning
T303_05130	AIC24297	21	48.41	51.61	54.99	38.85	29	34	0.288403	0.501187	0.253513	0.416869	0.364993	0.352636	0.114795	0.0005	Yes	0.0059	Yes	0.0016	Yes	Down	T303_05130	-1.50375	2.79588	Down	5-methyltetrahydropteroyltriglutamate--homocysteine methyltransferase	Amino acid transport and metabolism
T303_07355	AIC24658	547	1.89	2.15	27.93	4.297	4.297	5	0.505825	0.293765	0.394457	0.310456	0.376126	0.352457	0.0970458	0.0003	Yes	0.0039	Yes	0.001	Yes	Down	T303_07355	-1.50448	3	Down	heme ABC transporter ATP-binding protein	General function prediction only
T303_05515	AIC24358	105	20.77	21.38	54.49	31.73	21.93	12	0.299226	0.283139	0.465586	0.405509	0.363365	0.352368	0.0871305	0.0002	Yes	0.0026	Yes	0.0007	Yes	Down	T303_05515	-1.50485	3.1549	Down	glucosamine-fructose-6-phosphate aminotransferase	Cell wall/membrane/envelope biogenesis
T303_02740	AIC23897	447	3.05	3.14	47.8	20.13	15.09	2	0.239883	0.244343	0.440555	0.487529	0.353077	0.342449	0.12957	0.0007	Yes	0.0076	Yes	0.0021	Yes	Down	T303_02740	-1.54604	2.67778	Down	NrdR family transcriptional regulator	Transcription
T303_07020	AIC24604	497	2.17	2.27	49.04	25	20.19	3	0.559758	0.255859	0.428549	0.183654	0.356955	0.342204	0.169812	0.0016	Yes	0.0167	Yes	0.0048	Yes	Down	T303_07020	-1.54707	2.31876	Down	phosphoribosyl-ATP pyrophosphatase	Amino acid transport and metabolism
T303_03130	AIC23958	442	3.23	3.43	61.87	16.88	14.37	3	0.524808	0.328095	0.313329	0.190546	0.339194	0.320712	0.138252	0.0008	Yes	0.0084	Yes	0.0024	Yes	Down	T303_03130	-1.64065	2.61979	Down	S-ribosylhomocysteinase	Signal transduction mechanisms
T303_08165	AIC24789	197	12.78	13.93	58.75	23.74	23.74	9	0.349945	0.280543	0.334195	0.263027	0.306928	0.307369	0.0417031	< 0.0001	Yes	0.0002	Yes	0.0001	Yes	Down	T303_08165	-1.70196	4	Down	ribose-phosphate pyrophosphokinase	Nucleotide transport and metabolism
T303_09715	AIC25072	308	7.36	7.87	69.35	49.19	25	7	0.235505	0.510505	0.180302	0.356451	0.320691	0.295978	0.146372	0.0009	Yes	0.0087	Yes	0.0026	Yes	Down	T303_09715	-1.75644	2.58503	Down	repressor of the glutamine synthetase, MerR family transcriptional regulator	Transcription
T303_01345	AIC23678	233	11.03	11.31	45.72	26.55	24.48	7	0.253513	0.293765	0.277971	0.359749	0.29625	0.285868	0.0454566	< 0.0001	Yes	0.0002	Yes	0.0001	Yes	Down	T303_01345	-1.80658	4	Down	phosphoribosylaminoimidazole synthetase	Nucleotide transport and metabolism
T303_03125	AIC23957	412	4.1	4.12	48.83	12.5	7.422	2	0.325087	0.222843	0.363078	0.239883	0.287723	0.282485	0.0672618	< 0.0001	Yes	0.0007	Yes	0.0002	Yes	Down	T303_03125	-1.82375	3.69897	Down	acetyl-CoA carboxylase subunit alpha	Lipid transport and metabolism
T303_04425	AIC24182	317	7.12	7.44	37.85	19.77	15.54	5	0.178649	0.194089	0.135519	0.18197	0.172557	0.180309	0.0255678	< 0.0001	Yes	< 0.0001	Yes	0.0001	Yes	Down	T303_04425	-2.47145	4	Down	dehydrogenase	Lipid transport and metabolism
T303_04430	AIC24183	223	11.57	11.73	43.96	40.66	22.53	9	0.101859	0.144544	0.111686	0.158489	0.129145	0.128115	0.0267553	< 0.0001	Yes	< 0.0001	Yes	0.0001	Yes	Down	T303_04430	-2.96449	4	Down	alkylhydroperoxidase	Inorganic ion transport and metabolism
T303_00885	AIC23620	37	36.63	38.35	98.51	98.51	92.54	34	13.9316	14.3219	21.4783	22.08	17.953	17.9001	4.42784	0.0049	Yes	0.0044	Yes	0.0046	Yes	Up	T303_00885	4.1619	2.33724	Up	hypothetical protein	not assigned
T303_09840	AIC25091	217	11.83	12.2	50.96	44.23	40.38	8	10.7647	13.9316	12.1339	16.1436	13.2434	13.0327	2.32808	0.002	Yes	0.0017	Yes	0.0018	Yes	Up	T303_09840	3.70407	2.74473	Up	thioredoxin	not assigned
T303_00880	AIC23619	20	49.66	49.98	78.38	69.73	67.57	44	12.3595	9.12011	14.0605	10.4713	11.5028	11.4154	2.16154	0.0025	Yes	0.0022	Yes	0.0023	Yes	Up	T303_00880	3.51291	2.63827	Up	General stress regulator, Gls24 family	Function unknown
T303_05425	AIC24346	204	12.22	12.99	53.55	26.65	13.96	8	4.69894	3.98107	12.0226	9.81748	7.63003	7.25821	3.91519	0.0481	Yes	0.0393	Yes	0.0429	Yes	Up	T303_05425	2.85961	1.36754	Up	cystathionine beta-lyase	Amino acid transport and metabolism
T303_03920	AIC24091	47	34.44	36.22	61.64	52.28	40.18	25	6.36796	4.74242	9.81748	7.58578	7.12841	6.97687	2.13787	0.0121	Yes	0.0095	Yes	0.0105	Yes	Up	T303_03920	2.80258	1.97881	Up	pyridine nucleotide-disulfide oxidoreductase	Energy production and conversion
T303_06080	AIC24452	31	39.86	42.52	59.42	35.81	22.55	26	5.49541	4.69894	6.54636	5.34564	5.52159	5.42053	0.765626	0.0016	Yes	0.0011	Yes	0.0013	Yes	Up	T303_06080	2.43843	2.88606	Up	maltodextrin phosphorylase	Carbohydrate transport and metabolism
T303_06085	AIC24453	151	15.7	16.03	38.88	19.04	15.23	10	5.70164	4.65586	5.34564	3.80189	4.87626	5.00075	0.837539	0.0034	Yes	0.0023	Yes	0.0027	Yes	Up	T303_06085	2.32215	2.56864	Up	4-alpha-glucanotransferase	Carbohydrate transport and metabolism
T303_04835	AIC24246	173	14.4	14.55	51.45	31.79	31.79	14	4.92039	4.36516	5.34564	4.61318	4.81109	4.76679	0.422579	0.0005	Yes	0.0003	Yes	0.0004	Yes	Up	T303_04835	2.25302	3.39794	Up	DNA protection during starvation protein	Defense mechanisms
T303_07635	AIC24700	205	12.19	13.66	100	78.13	78.13	10	3.94457	5.70164	3.69828	4.9204	4.56622	4.43248	0.922747	0.0058	Yes	0.0038	Yes	0.0045	Yes	Up	T303_07635	2.14812	2.34679	Up	hypothetical protein	not assigned
T303_09105	AIC24964	181	13.92	14.3	63.03	38.03	17.61	7	4.69894	2.91072	6.08135	3.98107	4.41802	4.34001	1.33022	0.0183	Yes	0.0119	Yes	0.0143	Yes	Up	T303_09105	2.1177	1.84466	Up	amino acid ABC transporter substrate-binding protein	Amino acid transport and metabolism
T303_05420	AIC24345	392	4.49	4.83	24.42	15.51	14.19	5	5.39511	3.01995	5.80764	3.10456	4.33182	4.24983	1.47601	0.0261	Yes	0.0169	Yes	0.0203	Yes	Up	T303_05420	2.08741	1.6925	Up	cysteine synthase	Amino acid transport and metabolism
T303_04110	AIC24127	362	5.22	5.35	84.21	61.84	52.63	4	2.39883	4.20727	3.83707	5.70164	4.0362	4.02217	1.35691	0.0274	Yes	0.0171	Yes	0.0208	Yes	Up	T303_04110	2.00797	1.68194	Up	branched-chain amino acid aminotransferase	not assigned
T303_03425	AIC24008	294	7.83	7.97	35.88	17.65	14.71	9	3.98107	2.85759	5.39511	4.01791	4.06292	3.99949	1.03863	0.013	Yes	0.0079	Yes	0.0097	Yes	Up	T303_03425	1.99982	2.01323	Up	N-acetyl-gamma-glutamyl-phosphate reductase	Amino acid transport and metabolism
T303_03440	AIC24011	123	18	18.62	49.2	41.49	39.1	17	3.16228	2.65461	4.48745	3.90841	3.55319	3.53534	0.808145	0.0114	Yes	0.0063	Yes	0.008	Yes	Up	T303_03440	1.82185	2.09691	Up	acetylornithine aminotransferase	Amino acid transport and metabolism
T303_02240	AIC23814	112	19.02	20.06	90.53	90.53	90.53	25	3.43558	2.24905	4.7863	3.04789	3.37971	3.24174	1.05989	0.0294	Yes	0.016	Yes	0.0206	Yes	Up	T303_02240	1.69677	1.68613	Up	molecular chaperone GroES	Posttranslational modification, protein turnover, chaperones
T303_04825	AIC24244	367	5.16	6.6	28.64	25	14.55	4	3.94457	3.34195	2.99226	2.44343	3.18055	3.16711	0.629438	0.0094	Yes	0.0046	Yes	0.0062	Yes	Up	T303_04825	1.66317	2.20761	Up	superoxide dismutase	Inorganic ion transport and metabolism
T303_05985	AIC24435	216	11.86	11.89	58.54	32.93	32.93	8	1.92309	3.31131	2.72898	4.05509	3.00462	3.02014	0.902444	0.0325	Yes	0.0158	Yes	0.0212	Yes	Up	T303_05985	1.59462	1.67366	Up	lipid hydroperoxide peroxidase	Posttranslational modification, protein turnover, chaperones
T303_00870	AIC23617	269	9.29	9.47	55.32	24.47	17.55	8	2.88403	2.18776	3.90841	3.13329	3.02837	3.00866	0.710148	0.0166	Yes	0.0079	Yes	0.0106	Yes	Up	T303_00870	1.58912	1.97469	Up	membrane protein	not assigned
T303_05405	AIC24342	307	7.38	7.81	24.28	12.64	6.753	5	2.93765	3.04789	2.91072	3.34195	3.05955	2.99277	0.197397	0.0004	Yes	0.0002	Yes	0.0002	Yes	Up	T303_05405	1.58148	3.69897	Up	ATPase	Inorganic ion transport and metabolism
T303_00615	AIC23577	148	15.83	17.51	88.78	78.57	69.39	11	2.77971	3.94457	2.26986	3.16228	3.03911	2.971	0.705705	0.016	Yes	0.0076	Yes	0.0103	Yes	Up	T303_00615	1.57095	1.98716	Up	50S ribosomal protein L23	Translation, ribosomal structure and biogenesis
T303_08745	AIC24895	543	1.96	3.26	53.73	23.88	23.88	2	2.91072	2.37684	3.22107	2.77971	2.82208	2.84522	0.349801	0.0032	Yes	0.0013	Yes	0.0019	Yes	Up	T303_08745	1.50854	2.72125	Up	copper-binding protein	not assigned
T303_01900	AIC23752	501	2.15	2.26	35.62	35.62	31.51	5	2.208	3.34195	1.95884	2.96483	2.61841	2.58642	0.644716	0.0264	Yes	0.0105	Yes	0.0152	Yes	Up	T303_01900	1.37096	1.81816	Up	hypothetical protein	not assigned
T303_08290	AIC24814	145	16.15	16.52	77.65	56.82	40.15	12	3.01995	2.0893	2.85759	2.03236	2.4998	2.47344	0.511725	0.0183	Yes	0.0066	Yes	0.0099	Yes	Up	T303_08290	1.30652	2.00436	Up	amino acid ABC transporter substrate-binding protein	Amino acid transport and metabolism
T303_03435	AIC24010	100	22.16	22.57	46.12	42.86	30.61	13	2.24905	1.95885	3.16228	2.58226	2.48811	2.41566	0.516603	0.0193	Yes	0.0069	Yes	0.0104	Yes	Up	T303_03435	1.27242	1.98297	Up	acetylglutamate kinase	Amino acid transport and metabolism
T303_02095	AIC23789	107	20.09	20.19	61.02	38.35	24.15	13	1.95885	2.70396	2.10863	2.65461	2.35651	2.38162	0.378226	0.0113	Yes	0.0035	Yes	0.0056	Yes	Up	T303_02095	1.25194	2.25181	Up	Fe-S cluster assembly protein SufB	Posttranslational modification, protein turnover, chaperones
T303_04795	AIC24238	207	12.14	12.45	55.38	46.24	38.17	8	2.80543	2.53513	1.88799	1.94089	2.29236	2.23801	0.45064	0.0217	Yes	0.0066	Yes	0.0105	Yes	Up	T303_04795	1.16221	1.97881	Up	cytoplasmic membrane protein	Function unknown
T303_07670	AIC24707	127	17.56	17.71	62.67	45.62	37.33	12	2.65461	2.03236	2.35505	1.59956	2.16039	2.1937	0.452057	0.0319	Yes	0.0086	Yes	0.0143	Yes	Up	T303_07670	1.13337	1.84466	Up	NAD(P)H nitroreductase	Energy production and conversion
T303_03875	AIC24082	158	15.44	15.53	35.78	26.91	23.85	12	2.05116	1.87068	2.05116	2.12814	2.02529	2.05116	0.109271	0.0009	Yes	0.0002	Yes	0.0003	Yes	Up	T303_03875	1.03644	3.52288	Up	sulfurtransferase	General function prediction only
T303_09015	AIC24947	115	18.57	18.64	80	70	65.33	14	1.92309	2.12814	1.92309	2.07014	2.01112	1.99662	0.104363	0.0009	Yes	0.0002	Yes	0.0003	Yes	Up	T303_09015	0.997557	3.52288	Up	universal stress protein UspA	Signal transduction mechanisms
T303_08720	AIC24891	118	18.29	18.41	64.79	37.68	29.93	17	1.51356	1.80302	1.8197	1.92309	1.76484	1.81136	0.175738	0.0132	Yes	0.0015	Yes	0.0032	Yes	Up	T303_08720	0.857073	2.49485	Up	amino acid ABC transporter substrate-binding protein	Amino acid transport and metabolism
T303_04105	AIC24126	287	8.31	8.51	34.12	21.76	15.59	7	1.69044	1.80302	1.78649	1.87068	1.78766	1.79475	0.0743448	0.001	Yes	0.0001	Yes	0.0002	Yes	Up	T303_04105	0.843785	3.69897	Up	branched-chain amino acid aminotransferase	Amino acid transport and metabolism
T303_04595	AIC24207	356	5.47	5.76	53.42	36.99	24.66	6	1.67494	1.5417	2.07014	1.72187	1.75216	1.69841	0.225304	0.0278	Yes	0.0032	Yes	0.0069	Yes	Up	T303_04595	0.764181	2.16115	Up	hypothetical protein	not assigned
T303_02205	AIC23807	444	3.18	3.29	47.32	25.89	25.89	3	1.59956	1.78649	1.39316	1.51356	1.57319	1.55656	0.165488	0.0457	Yes	0.0023	Yes	0.0062	Yes	Up	T303_02205	0.638361	2.20761	Up	preprotein translocase subunit YajC	Intracellular trafficking, secretion, and vesicular transport
T303_00325	AIC23536	282	8.49	10.93	41.7	20.24	14.57	6	1.48594	1.59956	1.39316	1.58489	1.51589	1.53541	0.0961292	0.0206	Yes	0.0006	Yes	0.0017	Yes	Up	T303_00325	0.618628	2.76955	Up	threonine synthase	Amino acid transport and metabolism
T303_08905	AIC24925	1	118.06	118.06	81.69	71.67	60.8	95	1.5417	1.38038	1.61436	1.44544	1.49547	1.49357	0.103311	0.0324	Yes	0.0008	Yes	0.0024	Yes	Up	T303_08905	0.578765	2.61979	Up	ATP-dependent Clp protease ATP-binding protein	Posttranslational modification, protein turnover, chaperones
T303_02655	AIC23881	569	1.47	11.37	50.71	24.82	18.44	9	1.55597	2.58226	8.47227	13.4276	6.50954	5.52727	5.52793	0.156	No	0.1294	No	0.1402	No		T303_02655	2.46657	0.853252	None	amino acid ABC transporter substrate-binding protein	Amino acid transport and metabolism
T303_07680	AIC24709	153	15.58	16	54.67	43.33	25	10	3.37287	2.39883	7.65597	5.59758	4.75631	4.48522	2.35141	0.0605	No	0.0427	Yes	0.0495	Yes		T303_07680	2.16518	1.30539	None	aldo/keto reductase	Secondary metabolites biosynthesis, transport and catabolism
T303_04170	AIC24135	247	10.21	10.43	49.28	25.36	23.05	10	9.81748	5.29664	3.37287	1.59956	5.02164	4.33475	3.53576	0.1259	No	0.0954	No	0.1074	No		T303_04170	2.11595	0.968996	None	ornithine carbamoyltransferase	Amino acid transport and metabolism
T303_05970	AIC24432	140	16.44	16.62	46.45	31.12	18.76	8	4.92039	7.31139	1.92309	3.04789	4.30069	3.98414	2.35732	0.0842	No	0.0578	No	0.0678	No		T303_05970	1.99427	1.16877	None	O-acetylhomoserine (thiol)-lyase	Amino acid transport and metabolism
T303_06890	AIC24579	418	4.04	4.26	19.27	15.29	9.786	3	6.54636	6.60694	1.31826	1.38038	3.96298	3.96337	3.01821	0.1758	No	0.1246	No	0.1444	No		T303_06890	1.98673	0.840433	None	dihydroorotate dehydrogenase	Nucleotide transport and metabolism
T303_02630	AIC23877	298	7.76	8.95	54.26	24.82	18.44	9	6.54636	7.17794	1.02802	1.21339	3.99143	3.87988	3.3257	0.204	No	0.148	No	0.1699	No		T303_02630	1.95601	0.769807	None	amino acid ABC transporter substrate-binding protein	Amino acid transport and metabolism
T303_02075	AIC23785	114	18.75	19.78	64.04	53.93	46.07	14	4.7863	2.88403	3.46737	1.75388	3.2229	3.1757	1.26186	0.0555	No	0.0301	Yes	0.0388	Yes		T303_02075	1.66707	1.41117	None	iron ABC transporter ATP-binding protein	Posttranslational modification, protein turnover, chaperones
T303_03430	AIC24009	176	14.23	14.42	44.33	31.49	17.13	10	3.87258	4.7863	1.80302	1.94089	3.1007	2.90673	1.46813	0.0914	No	0.0502	No	0.0645	No		T303_03430	1.5394	1.19044	None	N-acetylglutamate synthase	Amino acid transport and metabolism
T303_04045	AIC24114	564	1.58	2.26	27.27	11.89	9.091	4	1.80302	1.90546	3.7325	4.28549	2.93162	2.81898	1.26506	0.0818	No	0.0419	Yes	0.0553	No		T303_04045	1.49517	1.25727	None	thymidylate synthase	Nucleotide transport and metabolism
T303_02080	AIC23786	76	26.59	27.58	48.1	40.24	32.14	18	2.44343	1.38038	5.29663	3.10456	3.05625	2.774	1.65386	0.1237	No	0.0698	No	0.0887	No		T303_02080	1.47197	1.05208	None	Fe-S cluster assembly protein SufD	Posttranslational modification, protein turnover, chaperones
T303_03385	AIC24002	189	13.31	14.22	46.05	20.79	19.74	8	4.01791	3.25087	2.14783	1.92309	2.83493	2.69935	0.979115	0.0519	No	0.0243	Yes	0.0332	Yes		T303_03385	1.43261	1.47886	None	protease maturation protein	not assigned
T303_08530	AIC24858	378	4.81	5.66	31.16	17.52	11.81	7	1.75388	2.60615	2.44343	4.20727	2.75268	2.52479	1.03771	0.0679	No	0.0315	Yes	0.0432	Yes		T303_08530	1.33616	1.36452	None	alpha-amylase	Carbohydrate transport and metabolism
T303_02960	AIC23933	70	27.6	30.23	69.03	53.23	42.58	19	2.55859	4.7863	1.33045	2.48886	2.79105	2.52372	1.4445	0.1309	No	0.0679	No	0.0893	No		T303_02960	1.33555	1.04915	None	cysteine synthase	Amino acid transport and metabolism
T303_06185	AIC24469	366	5.17	8.16	39.39	16.23	9.307	7	1.10662	1.18032	3.7325	3.94457	2.491	2.45641	1.55869	0.2239	No	0.1142	No	0.1517	No		T303_06185	1.29655	0.819014	None	branched-chain alpha-keto acid dehydrogenase subunit E2	Energy production and conversion
T303_00780	AIC23603	262	9.58	11.24	36.38	14.99	9.264	9	1.43219	5.7544	0.751623	3.46737	2.85139	2.44978	2.25315	0.2622	No	0.1617	No	0.1988	No		T303_00780	1.29265	0.701584	None	ribonucleoside triphosphate reductase	Nucleotide transport and metabolism
T303_09085	AIC24960	244	10.31	10.65	35.62	22.88	14.71	8	3.16228	1.61436	3.13329	1.57036	2.37007	2.37382	0.89828	0.0974	No	0.0377	Yes	0.0554	No		T303_09085	1.24721	1.25649	None	thioredoxin reductase	Posttranslational modification, protein turnover, chaperones
T303_00515	AIC23557	390	4.52	5.07	61.11	52.78	40.28	3	2.55859	3.13329	1.47231	2.1677	2.33297	2.36314	0.697484	0.0594	No	0.0207	Yes	0.0315	Yes		T303_00515	1.24071	1.50169	None	translation initiation factor IF-1	Translation, ribosomal structure and biogenesis
T303_01850	AIC23747	5	82.86	82.79	71.66	64.91	52.88	54	2.1677	1.10662	4.36516	2.48886	2.53209	2.32828	1.35729	0.1671	No	0.0805	No	0.1092	No		T303_01850	1.21926	0.961777	None	molecular chaperone DnaK	Posttranslational modification, protein turnover, chaperones
T303_06305	AIC24486	331	6.4	9.3	85.87	57.61	42.39	6	3.80189	1.83654	2.80543	1.36773	2.4529	2.32099	1.08036	0.1225	No	0.0526	No	0.0744	No		T303_06305	1.21474	1.12843	None	hypothetical protein	Signal transduction mechanisms
T303_00970	AIC23632	291	8.05	8.31	32.98	17.43	16.35	6	2.39883	1.39316	4.36516	2.22844	2.5964	2.31363	1.2584	0.1314	No	0.0623	No	0.0849	No		T303_00970	1.21016	1.07109	None	thiouridylase	Translation, ribosomal structure and biogenesis
T303_05350	AIC24333	318	7.03	7.21	65.2	12.84	12.84	5	1.51356	1.38038	3.28095	2.99226	2.29179	2.25291	0.984109	0.1372	No	0.0535	No	0.0786	No		T303_05350	1.17179	1.10458	None	ATPase P	Signal transduction mechanisms
T303_03820	AIC24072	552	1.79	2.05	17.08	4.09	1.738	4	1.35519	2.37684	2.12814	3.94457	2.45119	2.25249	1.08648	0.1243	No	0.0535	No	0.0756	No		T303_03820	1.17152	1.12148	None	cell surface protein	not assigned
T303_02930	AIC23928	218	11.81	12.81	46.8	24.81	15.86	7	1.55597	1.47231	2.88403	2.72898	2.16032	2.14247	0.749606	0.1054	No	0.034	Yes	0.0535	No		T303_02930	1.09928	1.27165	None	branched-chain amino acid ABC transporter substrate-binding protein	Amino acid transport and metabolism
T303_04895	AIC24257	326	6.64	6.82	31.22	19.05	14.81	4	3.0761	2.35505	1.78649	1.33045	2.13702	2.07077	0.753397	0.1128	No	0.036	Yes	0.0568	No		T303_04895	1.05017	1.24565	None	cell division protein SepF	Cell cycle control, cell division, chromosome partitioning
T303_03515	AIC24022	32	39.58	40.96	60.88	41.52	38.52	31	1.85353	1.48594	2.58226	2.24905	2.0427	2.05129	0.475912	0.0524	No	0.0128	Yes	0.022	Yes		T303_03515	1.03653	1.65758	None	F0F1 ATP synthase subunit alpha	Energy production and conversion
T303_07885	AIC24741	302	7.63	8.44	39.84	13.35	9.363	4	2.91072	1.97697	2.03236	1.09648	2.00413	2.00466	0.741005	0.1536	No	0.0446	Yes	0.0732	No		T303_07885	1.00336	1.13549	None	galactose-1-phosphate uridylyltransferase	Carbohydrate transport and metabolism
T303_07930	AIC24749	177	14.14	18.26	34.35	20.16	12.6	11	2.67917	2.14783	1.85353	1.45881	2.03484	2.00068	0.514005	0.0646	No	0.016	Yes	0.0275	Yes		T303_07930	1.00049	1.56067	None	glutamate--cysteine ligase	Coenzyme transport and metabolism
T303_03025	AIC23937	128	17.54	17.86	69.35	48.06	39.68	24	1.87068	1.34276	2.91072	2.07014	2.04858	1.97041	0.651554	0.1052	No	0.0294	Yes	0.0486	Yes		T303_03025	0.978497	1.31336	None	inorganic diphosphatase PpaC	Energy production and conversion
T303_06235	AIC24476	221	11.69	11.95	48.45	24.23	15.49	6	3.13329	1.75388	2.1677	1.27057	2.08136	1.96079	0.791332	0.1428	No	0.0452	Yes	0.0718	No		T303_06235	0.971437	1.14388	None	CRISPR-associated protein CasC	not assigned
T303_02410	AIC23840	335	6.22	6.34	64.38	21.88	15.63	4	2.10863	4.44631	0.704693	1.78649	2.26153	1.94756	1.57544	0.3094	No	0.1545	No	0.2076	No		T303_02410	0.961666	0.682773	None	transcription elongation factor GreA	Transcription
T303_08485	AIC24851	310	7.3	7.42	58.78	51.15	38.17	7	3.34195	2.0893	1.69044	1.08643	2.05203	1.88987	0.953663	0.2129	No	0.0744	No	0.1145	No		T303_08485	0.918286	0.941195	None	lactoylglutathione lyase	Secondary metabolites biosynthesis, transport and catabolism
T303_00820	AIC23611	343	5.81	7.15	37.56	17.61	11.97	8	2.07014	2.31206	1.41906	1.70608	1.87684	1.88811	0.393916	0.0611	No	0.0111	Yes	0.0211	Yes		T303_00820	0.916944	1.67572	None	histidyl-tRNA synthase	Translation, ribosomal structure and biogenesis
T303_02165	AIC23800	520	2.04	2.23	50.33	23.84	16.56	4	1.80302	1.22462	4.05509	1.95884	2.26039	1.88093	1.23745	0.2184	No	0.095	No	0.1344	No		T303_02165	0.911447	0.871601	None	MarR family transcriptional regulator	Transcription
T303_09505	AIC25032	393	4.49	4.69	17.69	9.321	3.791	4	2.44343	2.96483	1.05682	1.28233	1.93685	1.86288	0.915828	0.2585	No	0.0839	No	0.1333	No		T303_09505	0.897535	0.87517	None	PTS sucrose transporter subunit IIABC	Carbohydrate transport and metabolism
T303_04580	AIC24204	301	7.67	8.16	47.9	25.57	12.94	7	2.18776	0.946237	3.22107	1.47231	1.95685	1.83004	0.984494	0.2743	No	0.0948	No	0.1472	No		T303_04580	0.871873	0.832092	None	HPr kinase/phosphorylase	Signal transduction mechanisms
T303_03165	AIC23962	98	22.32	23.48	52.67	31.11	23.33	15	1.13763	1.14815	2.60615	2.51189	1.85096	1.83002	0.818519	0.2709	No	0.0774	No	0.1291	No		T303_03165	0.87186	0.889074	None	glutathione reductase	Energy production and conversion
T303_02375	AIC23833	492	2.21	2.35	45.38	17.18	5.385	2	1.02802	0.937562	2.91072	2.63027	1.87664	1.82914	1.03912	0.348	No	0.1228	No	0.1901	No		T303_02375	0.871167	0.721018	None	RNA methyltransferase	Translation, ribosomal structure and biogenesis
T303_07215	AIC24636	400	4.23	4.95	61.45	22.9	13.36	4	2.26987	1.52757	2.10863	1.38038	1.82161	1.8181	0.433764	0.0954	No	0.0167	Yes	0.0323	Yes		T303_07215	0.862429	1.4908	None	glutamine amidotransferase	General function prediction only
T303_02915	AIC23925	372	4.98	5.1	20.41	17.86	17.86	3	3.0761	0.559758	3.37287	0.559758	1.89212	1.81793	1.54324	0.4987	No	0.2416	No	0.3313	No		T303_02915	0.862295	0.479779	None	ATP-dependent Clp protease proteolytic subunit	Posttranslational modification, protein turnover, chaperones
T303_06730	AIC24551	155	15.55	15.59	68.97	68.97	68.97	9	2.60615	2.10863	1.51356	1.24738	1.86893	1.81109	0.609251	0.1586	No	0.0365	Yes	0.065	No		T303_06730	0.856862	1.18709	None	hypothetical protein	not assigned
T303_02010	AIC23772	229	11.19	11.45	60.29	30.39	30.39	10	1.90546	2.88403	1	1.65959	1.86227	1.78252	0.781122	0.2456	No	0.0679	No	0.1143	No		T303_02010	0.833921	0.941954	None	peptide deformylase	Translation, ribosomal structure and biogenesis
T303_06195	AIC24471	190	13.16	15.45	35.6	28.17	25.39	12	1.88799	1.2942	2.10863	1.67494	1.74144	1.78147	0.346772	0.0842	No	0.0112	Yes	0.0235	Yes		T303_06195	0.833066	1.62893	None	pyruvate dehydrogenase E1 subunit alpha	Energy production and conversion
T303_00535	AIC23561	259	9.77	10.74	91.67	81.67	66.67	10	1.34276	1.92309	1.61436	2.46604	1.83656	1.76873	0.481989	0.1124	No	0.0214	Yes	0.0403	Yes		T303_00535	0.82271	1.39469	None	50S ribosomal protein L30	Translation, ribosomal structure and biogenesis
T303_08300	AIC24816	329	6.45	7.52	63.02	25.66	21.13	5	3.25087	1.1272	2.39883	0.946237	1.93079	1.76302	1.09191	0.3316	No	0.1233	No	0.1868	No		T303_08300	0.818045	0.728623	None	amino acid ABC transporter substrate-binding protein	Amino acid transport and metabolism
T303_08675	AIC24884	448	3.04	3.22	71.43	34.13	16.67	2	2.24905	2.18776	1.22462	1.33045	1.74797	1.75911	0.545503	0.199	No	0.0371	Yes	0.0712	No		T303_08675	0.814844	1.14752	None	helicase	not assigned
T303_05720	AIC24389	431	3.62	3.79	27.42	12.72	3.943	3	0.879022	0.534564	3.83707	2.63027	1.97023	1.75465	1.54624	0.4498	No	0.2181	No	0.2984	No		T303_05720	0.811179	0.525201	None	acetolactate synthase	Amino acid transport and metabolism
T303_04390	AIC24175	395	4.43	4.62	64.29	29.46	19.64	4	2.03236	2.33346	1.27057	1.43219	1.76714	1.73227	0.499942	0.1584	No	0.0282	Yes	0.0546	No		T303_04390	0.792666	1.26281	None	hypothetical protein	Signal transduction mechanisms
T303_01155	AIC23665	72	26.99	27.41	56.49	30.84	20.31	16	2.0893	1.45881	1.90546	1.2942	1.68694	1.68214	0.372349	0.1292	No	0.016	Yes	0.0345	Yes		T303_01155	0.750296	1.46218	None	cell division protein FtsH	Posttranslational modification, protein turnover, chaperones
T303_05290	AIC24324	432	3.59	5.9	47.58	14.5	7.379	3	1.33045	1.70608	1.64437	2.1677	1.71215	1.67523	0.345375	0.097	No	0.0121	Yes	0.0259	Yes		T303_05290	0.744356	1.5867	None	aspartate aminotransferase	Amino acid transport and metabolism
T303_09180	AIC24977	88	24.02	25.6	38.94	18.68	16.42	17	1.99526	1.88799	1.38038	1.19124	1.61372	1.63419	0.388901	0.2051	No	0.0225	Yes	0.051	No		T303_09180	0.708574	1.29243	None	X-prolyl-dipeptidyl aminopeptidase	General function prediction only
T303_05725	AIC24390	434	3.59	3.67	30.54	7.95	7.95	2	1.34276	1.13763	2.10863	1.92309	1.62803	1.63293	0.461847	0.2506	No	0.0338	Yes	0.0726	No		T303_05725	0.707462	1.13906	None	alpha-acetolactate decarboxylase	Secondary metabolites biosynthesis, transport and catabolism
T303_04375	AIC24172	397	4.37	4.7	41.13	14.08	7.606	3	0.92045	1.04713	2.18776	2.208	1.59084	1.61745	0.702911	0.4686	No	0.1014	No	0.1913	No		T303_04375	0.693717	0.718285	None	3-dehydroquinate synthase	Amino acid transport and metabolism
T303_01320	AIC23673	436	3.4	3.57	41.62	13.47	5.389	3	1.27057	2.07014	1.23595	1.95884	1.63388	1.61471	0.442066	0.2281	No	0.0297	Yes	0.0642	No		T303_01320	0.691274	1.19246	None	phosphate acyltransferase	Lipid transport and metabolism
T303_09475	AIC25027	275	8.86	18.86	57.43	39.94	29.15	11	1.7378	2.46604	0.92045	1.47231	1.64915	1.60506	0.642247	0.3565	No	0.0713	No	0.1365	No		T303_09475	0.682624	0.864867	None	phospho-2-dehydro-3-deoxyheptonate aldolase	Amino acid transport and metabolism
T303_04305	AIC24159	199	12.63	14.62	48.29	26.71	20.09	13	0.879022	1.19124	2.01372	2.75423	1.70955	1.60248	0.845043	0.4039	No	0.1125	No	0.1917	No		T303_04305	0.680309	0.717378	None	peptidyl-prolyl cis-trans isomerase	Posttranslational modification, protein turnover, chaperones
T303_06865	AIC24574	384	4.71	4.82	22.41	11.85	8.836	4	0.49204	1.05682	2.14783	5.54626	2.31074	1.60232	2.26385	0.4377	No	0.2665	No	0.3307	No		T303_06865	0.680166	0.480566	None	isopropylmalate isomerase	Amino acid transport and metabolism
T303_01855	AIC23748	292	7.98	9.47	30.29	10.7	9.399	5	1.55597	1.20226	2.03236	1.64437	1.60874	1.60017	0.340944	0.1678	No	0.016	Yes	0.0375	Yes		T303_01855	0.678224	1.42597	None	molecular chaperone DnaJ	Posttranslational modification, protein turnover, chaperones
T303_06070	AIC24451	385	4.7	5.93	42.25	21.28	9.119	4	1.5417	1.36773	1.85353	1.64437	1.60183	1.59304	0.202963	0.0589	No	0.0038	Yes	0.0096	Yes		T303_06070	0.671779	2.01773	None	lipoate-protein ligase A	Coenzyme transport and metabolism
T303_05580	AIC24364	470	2.59	2.67	51.29	12.5	6.897	3	1.92309	2.33346	1.11686	1.23595	1.65234	1.57952	0.576584	0.3089	No	0.0548	No	0.1086	No		T303_05580	0.659486	0.96417	None	GntR family transcriptional regulator	Transcription
T303_03525	AIC24024	84	25.05	25.1	62.61	45.94	37.61	19	2.03236	0.963829	2.46604	1.10662	1.64221	1.56949	0.72525	0.4149	No	0.0952	No	0.1747	No		T303_03525	0.650296	0.757707	None	F0F1 ATP synthase subunit beta	Energy production and conversion
T303_06995	AIC24599	312	7.24	8.33	48.54	23.95	17.15	7	1.38038	1.11686	2.24905	1.75388	1.62505	1.56713	0.491289	0.2776	No	0.0399	Yes	0.0843	No		T303_06995	0.648127	1.07417	None	ribonuclease Z	Translation, ribosomal structure and biogenesis
T303_07645	AIC24702	458	2.84	2.91	47	15	15	2	1.90546	1.77011	1.2942	1.20226	1.54301	1.53215	0.346872	0.2557	No	0.021	Yes	0.052	No		T303_07645	0.61556	1.284	None	hypothetical protein	General function prediction only
T303_05015	AIC24279	473	2.54	2.67	36.71	31.65	31.65	2	3.25087	1.61436	1.44544	0.642688	1.73834	1.5299	1.09383	0.4815	No	0.1745	No	0.2698	No		T303_05015	0.613437	0.568958	None	D-alanine--poly(phosphoribitol) ligase	Lipid transport and metabolism
T303_02710	AIC23891	285	8.34	9.06	47.09	27.8	13.9	6	2.01372	1.38038	1.67494	1.14815	1.5543	1.52766	0.374534	0.2676	No	0.0248	Yes	0.0595	No		T303_02710	0.611327	1.22548	None	potassium transporter Trk	Inorganic ion transport and metabolism
T303_09010	AIC24946	164	15.1	15.42	44.31	24.5	19.06	9	1.87068	1.48594	1.55597	1.24738	1.53999	1.52095	0.257004	0.1586	No	0.0093	Yes	0.0246	Yes		T303_09010	0.604974	1.60906	None	aminotransferase AlaT	Amino acid transport and metabolism
T303_06880	AIC24577	163	15.19	15.55	37.69	20.96	16.35	12	1.80302	1.33045	1.67494	1.11686	1.48132	1.5027	0.314414	0.3323	No	0.0201	Yes	0.0549	No		T303_06880	0.587556	1.26043	None	2-isopropylmalate synthase	Amino acid transport and metabolism
T303_05660	AIC24380	551	1.81	1.99	30.28	16.9	9.155	2	1.36773	0.847227	2.65461	1.6293	1.62471	1.49851	0.759654	0.4554	No	0.1097	No	0.1986	No		T303_05660	0.583531	0.702021	None	nucleoside diphosphate kinase	Nucleotide transport and metabolism
T303_06980	AIC24596	201	12.58	12.73	69.19	41.28	23.84	6	3.0761	1.72187	1.27057	0.787046	1.7139	1.49622	0.985096	0.4624	No	0.1509	No	0.2431	No		T303_06980	0.581324	0.614215	None	adenine phosphoribosyltransferase	Nucleotide transport and metabolism
T303_07300	AIC24651	69	27.78	28.16	37.69	28.37	20.58	20	1.48594	1.72187	1.39316	1.48594	1.52172	1.48594	0.140415	0.0509	No	0.0017	Yes	0.005	Yes		T303_07300	0.571372	2.30103	None	ribonucleotide-diphosphate reductase subunit alpha	Nucleotide transport and metabolism
T303_06180	AIC24468	136	16.57	19.24	36.3	22.09	15.75	14	1.23595	1.51356	1.44544	1.77011	1.49126	1.4795	0.220256	0.1808	No	0.0072	Yes	0.021	Yes		T303_06180	0.56511	1.67778	None	dihydrolipoyl dehydrogenase	Energy production and conversion
T303_07385	AIC24663	408	4.14	4.3	35.71	19.64	10.71	2	1.2942	1.34276	1.61436	1.75388	1.5013	1.47856	0.219548	0.1641	No	0.0069	Yes	0.0197	Yes		T303_07385	0.564195	1.70553	None	ribonucleoside-triphosphate reductase	not assigned
T303_02755	AIC23900	284	8.46	8.76	41.97	20.18	15.83	6	1.90546	0.870964	2.24905	1.04713	1.51815	1.47629	0.664566	0.5584	No	0.1095	No	0.2168	No		T303_02755	0.561981	0.663941	None	GTP-binding protein Der	General function prediction only
T303_04945	AIC24266	295	7.81	8.32	45.59	30.88	17.28	7	1.45881	1.87068	1.1695	1.48594	1.49623	1.47237	0.287792	0.266	No	0.015	Yes	0.041	Yes		T303_04945	0.558145	1.38722	None	glutathione S-transferase	Posttranslational modification, protein turnover, chaperones
T303_07855	AIC24735	565	1.58	2	35.13	5.571	1.794	3	1.34276	1.13763	1.92309	1.59956	1.50076	1.47116	0.339093	0.3216	No	0.0229	Yes	0.0599	No		T303_07855	0.556956	1.22257	None	ATP-dependent dsDNA exonuclease	Replication, recombination and repair
T303_09525	AIC25036	324	6.66	7.48	44.06	37.76	33.57	6	2.07014	1.75388	1.14815	0.972747	1.48623	1.45102	0.513339	0.5206	No	0.0682	No	0.1545	No		T303_09525	0.537065	0.811072	None	hypothetical protein	Function unknown
T303_06900	AIC24581	121	18.06	19.5	70.33	67.03	67.03	17	1.80302	1.99526	0.954993	1.08643	1.45992	1.44472	0.515996	0.5792	No	0.0752	No	0.1727	No		T303_06900	0.530792	0.762708	None	transcriptional regulator	Replication, recombination and repair
T303_08100	AIC24778	14	56.74	58.63	61.49	47.79	35.31	33	2.07014	1.83654	1.03753	0.937562	1.47044	1.43703	0.567169	0.5902	No	0.0898	No	0.1957	No		T303_08100	0.523093	0.708409	None	peptide ABC transporter ATP-binding protein	Amino acid transport and metabolism
T303_04975	AIC24272	297	7.78	10.42	39.9	20.91	13.7	8	0.847227	0.92045	1.90546	1.95884	1.408	1.41296	0.606374	0.7453	No	0.1257	No	0.2711	No		T303_04975	0.498716	0.56687	None	serine hydroxymethyltransferase	Amino acid transport and metabolism
T303_02335	AIC23826	276	8.78	9.5	53.11	32.6	20.15	6	0.613762	1.1272	1.69044	3.04789	1.61982	1.40882	1.04868	0.585	No	0.2032	No	0.3223	No		T303_02335	0.494487	0.49174	None	NAD synthetase	Coenzyme transport and metabolism
T303_02330	AIC23825	345	5.8	6.2	35.54	14.26	9.504	5	1.1272	1.21339	1.59956	2.0893	1.50736	1.40647	0.438973	0.4145	No	0.0436	Yes	0.1039	No		T303_02330	0.492082	0.983384	None	nicotinate phosphoribosyltransferase	Coenzyme transport and metabolism
T303_02155	AIC23798	427	3.81	4.07	51.14	17.71	12	5	1.78649	1.48594	1.31826	1.13763	1.43208	1.4021	0.27578	0.4088	No	0.0171	Yes	0.0519	No		T303_02155	0.487586	1.28483	None	tRNA-dihydrouridine synthase	Translation, ribosomal structure and biogenesis
T303_08040	AIC24766	433	3.59	4.84	36.07	14.9	6.695	4	1.6293	1.39316	1.40605	1.25893	1.42186	1.3996	0.153461	0.2105	No	0.0034	Yes	0.0118	Yes		T303_08040	0.485017	1.92812	None	cell division protein FtsY	Intracellular trafficking, secretion, and vesicular transport
T303_01150	AIC23664	220	11.74	13.03	57.22	42.22	38.33	12	1.67494	1.21339	1.58489	1.18032	1.41339	1.39914	0.253078	0.4362	No	0.0147	Yes	0.0469	Yes		T303_01150	0.484541	1.32883	None	hypoxanthine phosphoribosyltransferase	Nucleotide transport and metabolism
T303_03095	AIC23951	381	4.74	4.88	50.82	15.57	11.89	4	1.20226	1.04713	1.75388	1.58489	1.39704	1.39358	0.328126	0.5958	No	0.0314	Yes	0.0942	No		T303_03095	0.478794	1.02595	None	3-ketoacyl-ACP reductase	Lipid transport and metabolism
T303_05140	AIC24299	120	18.15	18.85	50.17	25.87	19.41	11	0.895365	1.31826	1.44544	1.80302	1.36552	1.38185	0.374643	0.7496	No	0.05	Yes	0.1461	No		T303_05140	0.466599	0.83535	None	phosphoglucomutase	Carbohydrate transport and metabolism
T303_03510	AIC24021	212	11.96	13.19	65.73	30.34	30.34	8	1.57036	1.52757	1.23595	1.20226	1.38404	1.38176	0.191737	0.4453	No	0.0077	Yes	0.0279	Yes		T303_03510	0.466504	1.5544	None	F0F1 ATP synthase subunit delta	Energy production and conversion
T303_02345	AIC23828	74	26.71	26.79	43.15	36.4	33.71	21	1.70608	1.23595	1.52757	1.08643	1.38901	1.38176	0.279713	0.5697	No	0.0213	Yes	0.0689	No		T303_02345	0.466503	1.16178	None	aminopeptidase C	Amino acid transport and metabolism
T303_09480	AIC25028	54	31.32	31.48	65.01	47.81	37.03	20	1.83654	1.69044	1.04713	1.0666	1.41018	1.37852	0.412385	0.6302	No	0.0529	No	0.1408	No		T303_09480	0.463119	0.851397	None	phospho-2-dehydro-3-deoxyheptonate aldolase	Amino acid transport and metabolism
T303_08090	AIC24776	156	15.51	47.57	55.11	41.37	28.4	27	1.15878	1.40605	1.34276	1.70608	1.40342	1.37441	0.227406	0.4301	No	0.0114	Yes	0.0381	Yes		T303_08090	0.458809	1.41908	None	peptide ABC transporter ATP-binding protein	Amino acid transport and metabolism
T303_03470	AIC24016	568	1.52	1.64	28.36	20.9	20.9	2	1.34276	1.77011	1.0666	1.39316	1.39316	1.36796	0.28941	0.5656	No	0.023	Yes	0.0727	No		T303_03470	0.452027	1.13847	None	hypothetical protein	not assigned
T303_08475	AIC24850	182	13.86	14.11	52.47	32.14	27.47	9	1.38038	1.59956	1.07647	1.35519	1.3529	1.36779	0.214489	0.6557	No	0.0122	Yes	0.0461	Yes		T303_08475	0.451843	1.3363	None	phosphoserine aminotransferase	Amino acid transport and metabolism
T303_09565	AIC25043	264	9.44	10.24	40.28	9.883	5.632	6	1.2942	1.1272	1.57036	1.43219	1.35599	1.36319	0.189672	0.5965	No	0.0085	Yes	0.033	Yes		T303_09565	0.446989	1.48149	None	excinuclease ABC subunit A	Replication, recombination and repair
T303_07005	AIC24601	360	5.39	6.64	56.8	16.99	8.981	4	1.58489	0.765597	2.22844	1.13763	1.42914	1.36126	0.629392	0.7091	No	0.1269	No	0.266	No		T303_07005	0.444943	0.575118	None	GTP-binding protein HflX	Translation, ribosomal structure and biogenesis
T303_07305	AIC24652	429	3.68	4.18	36.25	23.44	9.375	5	1.41906	1.59956	1.21339	1.2942	1.38155	1.35663	0.16817	0.4037	No	0.0053	Yes	0.02	Yes		T303_07305	0.440024	1.69897	None	ribonucleoside-diphosphate reductase	Nucleotide transport and metabolism
T303_02005	AIC23771	365	5.19	5.36	26.92	11.78	8.173	4	1.21339	0.903649	1.99526	1.49968	1.403	1.35654	0.463834	0.687	No	0.0718	No	0.1807	No		T303_02005	0.439928	0.743042	None	threonine dehydratase	Amino acid transport and metabolism
T303_08750	AIC24896	479	2.41	2.58	31.4	7.008	3.639	2	1.18032	1.41906	1.28233	1.5417	1.35585	1.35069	0.157851	0.5302	No	0.005	Yes	0.0204	Yes		T303_08750	0.433701	1.69037	None	ActP protein	Inorganic ion transport and metabolism
T303_04065	AIC24118	416	4.07	4.09	59.8	20.1	12.56	3	1.19124	1.45881	1.22462	1.51356	1.34706	1.34172	0.162771	0.6037	No	0.0057	Yes	0.0237	Yes		T303_04065	0.424078	1.62525	None	GTP-binding protein YsxC	Cell cycle control, cell division, chromosome partitioning
T303_03075	AIC23947	349	5.72	5.88	44.37	9.375	9.375	4	1.25892	2.67917	0.660693	1.41906	1.50446	1.33899	0.848422	0.6628	No	0.1815	No	0.3199	No		T303_03075	0.421147	0.494986	None	3-oxoacyl-ACP synthase	Lipid transport and metabolism
T303_01085	AIC23651	103	21.35	22.05	45.26	34.55	24.82	22	1.57036	0.981748	1.8197	1.10662	1.36961	1.33849	0.392633	0.7464	No	0.0551	No	0.1563	No		T303_01085	0.42061	0.806041	None	serine protease	Posttranslational modification, protein turnover, chaperones
T303_00960	AIC23630	263	9.55	10.36	36.97	14.85	8.057	8	1.05682	1.65959	1.05682	1.61436	1.3469	1.33559	0.335461	0.798	No	0.0411	Yes	0.1305	No		T303_00960	0.417475	0.884389	None	tRNA uridine 5-carboxymethylaminomethyl modification protein	Translation, ribosomal structure and biogenesis
T303_00055	AIC23493	230	11.14	11.35	62.42	58.18	53.94	9	1.90546	1.20226	1.45881	0.972747	1.38482	1.33054	0.399864	0.7	No	0.0542	No	0.1499	No		T303_00055	0.412011	0.824198	None	carbonic anhydrases	Inorganic ion transport and metabolism
T303_01970	AIC23766	283	8.47	9.4	31.21	11.58	6.856	6	1.1272	1.61436	1.19124	1.45881	1.3479	1.32503	0.228439	0.7031	No	0.0148	Yes	0.0556	No		T303_01970	0.406023	1.25493	None	2', 3'-cyclic nucleotide 2'-phosphodiesterase	Nucleotide transport and metabolism
T303_09080	AIC24959	531	2.01	2.06	35.71	10.99	8.791	2	1.51356	1.33045	1.31826	1.15878	1.33026	1.32436	0.145086	0.7046	No	0.0045	Yes	0.0199	Yes		T303_09080	0.40529	1.70115	None	rRNA methyltransferase	Translation, ribosomal structure and biogenesis
T303_08420	AIC24840	411	4.1	4.13	49.77	20.93	8.837	2	0.855067	0.685488	2.18776	1.78649	1.3787	1.32078	0.724708	0.842	No	0.1911	No	0.3728	No		T303_08420	0.401387	0.428524	None	phosphoserine phosphatase	Amino acid transport and metabolism
T303_02090	AIC23788	471	2.58	4.89	22.52	12.58	9.934	4	3.16228	0.963829	1.65959	0.544503	1.58255	1.31171	1.14918	0.6566	No	0.2519	No	0.3853	No		T303_02090	0.391447	0.414201	None	Fe-S assembly protein NifU	Posttranslational modification, protein turnover, chaperones
T303_04885	AIC24255	81	25.65	25.8	46.59	36.14	32.5	15	1.41906	1.20226	1.38038	1.23595	1.30941	1.30817	0.106359	0.8708	No	0.002	Yes	0.0101	Yes		T303_04885	0.387545	1.99568	None	cell division protein FtsZ	Cell cycle control, cell division, chromosome partitioning
T303_04400	AIC24177	277	8.65	9.65	45.67	24.82	10.07	5	0.440555	0.496592	2.10863	2.33346	1.34481	1.30261	1.0162	0.9353	No	0.3396	No	0.546	No		T303_04400	0.381405	0.262807	None	3-phosphoshikimate 1-carboxyvinyltransferase	Amino acid transport and metabolism
T303_02720	AIC23893	499	2.16	2.46	44.3	9.283	5.485	3	1.11686	1.02802	1.6293	1.48594	1.31503	1.3014	0.288455	0.9236	No	0.0323	Yes	0.1169	No		T303_02720	0.380064	0.932185	None	16S rRNA methyltransferase	Translation, ribosomal structure and biogenesis
T303_06700	AIC24545	152	15.6	16.41	44.58	29.47	17.63	9	1.34276	1.6293	1.04713	1.24738	1.31664	1.29507	0.242122	0.8994	No	0.0202	Yes	0.0793	No		T303_06700	0.373035	1.10073	None	S-adenosylmethionine synthetase	Coenzyme transport and metabolism
T303_09785	AIC25082	459	2.78	2.92	33.58	14.96	4.745	2	1.40605	1.77011	0.972747	1.1695	1.3296	1.28777	0.342962	0.8739	No	0.0468	Yes	0.1503	No		T303_09785	0.364879	0.823041	None	purine operon repressor	Nucleotide transport and metabolism
T303_02810	AIC23906	228	11.21	11.59	71.19	30.04	22.22	7	0.824138	0.751623	1.7378	1.75388	1.26686	1.28097	0.553909	0.9123	No	0.1702	No	0.4063	No		T303_02810	0.357236	0.391153	None	cyclase	Amino acid transport and metabolism
T303_05155	AIC24302	371	4.99	5.11	42.29	20.7	7.93	2	0.597035	2.33346	0.461318	1.95884	1.33766	1.27794	0.947626	0.9416	No	0.3163	No	0.5275	No		T303_05155	0.35382	0.277778	None	phosphopantothenate--cysteine ligase	not assigned
T303_09765	AIC25078	18	52.37	52.29	73.91	62.03	61.45	55	0.325087	2.03236	0.519996	3.13329	1.50268	1.27618	1.32813	0.7802	No	0.35	No	0.5041	No		T303_09765	0.351828	0.297483	None	glyceraldehyde-3-phosphate dehydrogenase	Carbohydrate transport and metabolism
T303_01940	AIC23760	376	4.87	4.98	40.84	14.14	14.14	3	1.15878	1.1695	1.38038	1.41906	1.28193	1.27494	0.136997	0.809	No	0.0049	Yes	0.026	Yes		T303_01940	0.350431	1.58503	None	DNA-directed RNA polymerase subunit delta	Transcription
T303_04865	AIC24252	117	18.32	20.11	52.67	27.33	21.33	12	1.59956	0.912011	1.58489	0.963829	1.26507	1.27436	0.378403	0.8653	No	0.0789	No	0.2557	No		T303_04865	0.349774	0.592269	None	UDP-N-acetylmuramoyl-L-alanyl-D-glutamate synthetase	Cell wall/membrane/envelope biogenesis
T303_06915	AIC24584	404	4.18	7.27	47.48	21.22	13.67	5	1.39316	1.03753	1.52757	1.13763	1.27397	1.26539	0.22584	0.8325	No	0.0209	Yes	0.0936	No		T303_06915	0.339585	1.02872	None	hypothetical protein	Lipid transport and metabolism
T303_00755	AIC23598	278	8.63	8.85	77.42	74.19	61.29	8	1.52757	1.78649	0.870964	1	1.29625	1.26378	0.433002	0.9873	No	0.093	No	0.2647	No		T303_00755	0.337749	0.577246	None	50S ribosomal protein L28	Translation, ribosomal structure and biogenesis
T303_09830	AIC25089	541	1.97	2.39	47.29	23.64	10.85	4	0.544503	1.80302	0.724436	2.26986	1.33546	1.26373	0.834803	0.9377	No	0.268	No	0.4804	No		T303_09830	0.337685	0.318397	None	TatD family hydrolase	Cell motility
T303_01125	AIC23659	463	2.72	2.96	83.52	49.45	26.37	3	1.39316	1.25892	1.25893	1.11686	1.25697	1.25893	0.112819	0.501	No	0.0033	Yes	0.0198	Yes		T303_01125	0.332193	1.70333	None	hypothetical protein	Translation, ribosomal structure and biogenesis
T303_08250	AIC24806	422	4.01	6.62	42.03	23.05	15.25	7	0.990832	0.787046	1.95884	1.51356	1.31257	1.2522	0.528444	0.965	No	0.1319	No	0.322	No		T303_08250	0.324461	0.492144	None	dTDP-4-dehydrorhamnose reductase	Cell wall/membrane/envelope biogenesis
T303_01845	AIC23746	208	12.06	12.56	49.22	36.79	32.12	10	1.77011	1.45881	1.03753	0.83946	1.27648	1.24817	0.41833	0.9176	No	0.0937	No	0.278	No		T303_01845	0.319816	0.555955	None	heat shock protein GrpE	Posttranslational modification, protein turnover, chaperones
T303_01725	AIC23727	281	8.52	8.9	42.77	23.27	12.89	7	1.08643	1.02802	1.49968	1.40605	1.25504	1.24624	0.232827	0.7251	No	0.025	Yes	0.1162	No		T303_01725	0.317578	0.934794	None	2-dehydropantoate 2-reductase	Coenzyme transport and metabolism
T303_03065	AIC23945	172	14.4	14.79	47.53	35.36	24.71	7	1.45881	1.5417	0.928966	1.01859	1.23702	1.2387	0.308021	0.71	No	0.056	No	0.2214	No		T303_03065	0.30883	0.654822	None	enoyl-CoA hydratase	Lipid transport and metabolism
T303_06570	AIC24521	401	4.22	4.31	19.94	9.657	6.542	3	1.33045	1.49969	1.04713	1.13763	1.25372	1.23404	0.202109	0.6781	No	0.0173	Yes	0.0869	No		T303_06570	0.30339	1.06098	None	cell division protein FtsX	Cell cycle control, cell division, chromosome partitioning
T303_02395	AIC23837	146	15.9	16.13	46.98	29.08	24.16	11	0.981748	0.77983	1.6293	1.48594	1.2192	1.23384	0.403632	0.7157	No	0.112	No	0.3569	No		T303_02395	0.303157	0.447453	None	UDP-N-acetylmuramate--alanine ligase	Cell wall/membrane/envelope biogenesis
T303_08010	AIC24760	398	4.26	4.46	43.01	17.65	8.456	2	1.14815	1.44544	1.05682	1.31826	1.24217	1.23321	0.173496	0.5527	No	0.0121	Yes	0.0683	No		T303_08010	0.302413	1.16558	None	protein phosphatase	Signal transduction mechanisms
T303_09075	AIC24958	435	3.49	3.72	41.82	31.52	16.36	4	1.59956	1.15878	1.30617	0.946237	1.25269	1.23247	0.274415	0.753	No	0.0388	Yes	0.1628	No		T303_09075	0.301557	0.788346	None	phosphopantetheine adenylyltransferase	Coenzyme transport and metabolism
T303_08935	AIC24931	460	2.77	3.59	42.86	33.33	26.67	4	1.1695	1.51356	1	1.2942	1.24431	1.23185	0.216232	0.6421	No	0.0218	Yes	0.109	No		T303_08935	0.300824	0.962574	None	RNA-binding protein	Translation, ribosomal structure and biogenesis
T303_02945	AIC23931	403	4.19	4.57	41.73	22.05	6.693	2	0.787046	1.25892	1.20226	1.87068	1.27973	1.23059	0.446615	0.9334	No	0.1063	No	0.2991	No		T303_02945	0.299356	0.524184	None	branched-chain amino acid ABC transporter ATP-binding protein	Amino acid transport and metabolism
T303_04165	AIC24134	56	31.14	33.64	49.07	27.26	20.35	23	1.11686	1.02802	1.47231	1.34276	1.23999	1.22981	0.203822	0.5974	No	0.0191	Yes	0.0999	No		T303_04165	0.29844	1.00043	None	ATP-dependent Clp protease ATP-binding protein	Posttranslational modification, protein turnover, chaperones
T303_07880	AIC24740	270	9.24	10.9	40.24	25.53	15.62	11	1.69044	0.972747	1.48594	0.928966	1.26952	1.22934	0.377739	0.8821	No	0.0771	No	0.2488	No		T303_07880	0.297886	0.60415	None	UDP-glucose 4-epimerase	Cell wall/membrane/envelope biogenesis
T303_04175	AIC24136	399	4.25	4.44	27.63	22.37	22.37	3	1.31826	1.39316	1.0666	1.13763	1.22891	1.22794	0.152357	0.4196	No	0.0091	Yes	0.0574	No		T303_04175	0.296243	1.24109	None	hypothetical protein	Function unknown
T303_02660	AIC23882	71	27.36	31.89	69.33	47	41.67	21	1.58489	1.97697	0.691831	0.870964	1.28116	1.22793	0.603317	0.9541	No	0.1882	No	0.4201	No		T303_02660	0.296226	0.376647	None	O-sialoglycoprotein endopeptidase	Inorganic ion transport and metabolism
T303_07210	AIC24635	332	6.4	8.41	39.82	17.23	6.935	5	0.972747	0.981748	1.47231	1.51356	1.23509	1.22703	0.298232	0.6928	No	0.0523	No	0.213	No		T303_07210	0.295171	0.67162	None	UDP-N-acetylmuramyl peptide synthase	Cell wall/membrane/envelope biogenesis
T303_06645	AIC24534	274	9.05	9.31	41.7	25.11	22.13	6	2.1677	0.698232	1.7378	0.619441	1.30579	1.21802	0.768056	0.9889	No	0.2567	No	0.4841	No		T303_06645	0.284534	0.315065	None	PhoP family transcriptional regulator	Signal transduction mechanisms
T303_05900	AIC24421	300	7.7	7.96	55.02	35.89	21.53	8	0.731139	0.831764	1.58489	1.77011	1.22948	1.20833	0.524443	0.8054	No	0.1775	No	0.4459	No		T303_05900	0.273013	0.350763	None	orotate phosphoribosyltransferase	Nucleotide transport and metabolism
T303_04590	AIC24206	333	6.33	7.05	54.6	46.63	30.67	6	0.903649	1.35519	1.05682	1.64437	1.24001	1.206	0.328366	0.7391	No	0.0642	No	0.2399	No		T303_04590	0.270234	0.61997	None	chemotaxis protein	Function unknown
T303_03180	AIC23965	386	4.69	4.99	36.22	16.01	10.76	3	1.33045	1.1272	1.28233	1.11686	1.21421	1.20476	0.108321	0.2114	No	0.0038	Yes	0.0288	Yes		T303_03180	0.268751	1.54061	None	aminotransferase V	Amino acid transport and metabolism
T303_02865	AIC23917	450	3	3.18	63.25	17.09	11.97	2	0.963829	0.963829	1.44544	1.52757	1.22517	1.20463	0.303623	0.6559	No	0.0575	No	0.2347	No		T303_02865	0.268595	0.629487	None	ribosome-binding factor A	Translation, ribosomal structure and biogenesis
T303_06410	AIC24495	387	4.64	4.99	38.26	20	13.48	6	0.954993	1.30617	1.09648	1.49968	1.21433	1.20132	0.238752	0.5248	No	0.0336	Yes	0.1705	No		T303_06410	0.264626	0.768276	None	eps1C	Cell wall/membrane/envelope biogenesis
T303_00585	AIC23571	99	22.2	22.3	100	94.12	83.82	11	1.99526	1.47231	0.928966	0.704693	1.27531	1.20064	0.578129	0.9373	No	0.1783	No	0.4112	No		T303_00585	0.263803	0.385947	None	50S ribosomal protein L29	Translation, ribosomal structure and biogenesis
T303_09660	AIC25061	334	6.3	8.29	57	39.13	22.22	5	0.972747	1.07647	1.31826	1.43219	1.19991	1.19736	0.211975	0.4147	No	0.0269	Yes	0.1557	No		T303_09660	0.259858	0.807711	None	signal peptidase	not assigned
T303_00655	AIC23585	59	30.47	31.4	61.16	47.44	39.07	21	1.31826	1.58489	0.981748	1.0666	1.23787	1.19243	0.271919	0.6788	No	0.041	Yes	0.1785	No		T303_00655	0.2539	0.748362	None	adenylosuccinate synthetase	Nucleotide transport and metabolism
T303_08880	AIC24920	417	4.05	4.07	55.4	35.97	12.95	2	1.80302	1.58489	0.787046	0.685488	1.21511	1.18597	0.561579	0.7822	No	0.2105	No	0.4994	No		T303_08880	0.246067	0.301551	None	histidine triad protein	Nucleotide transport and metabolism
T303_09680	AIC25065	508	2.09	2.14	25.22	7.418	3.858	2	1.34276	0.630957	2.31206	1.02802	1.32845	1.18539	0.717509	0.9418	No	0.2169	No	0.4274	No		T303_09680	0.245363	0.369165	None	glycoprotease family protein	Translation, ribosomal structure and biogenesis
T303_06745	AIC24553	171	14.51	16.24	84.35	65.22	60.87	11	0.77983	0.879022	1.48594	1.78649	1.23282	1.18248	0.483387	0.7991	No	0.1509	No	0.4065	No		T303_06745	0.241815	0.390939	None	50S ribosomal protein L19	Translation, ribosomal structure and biogenesis
T303_07415	AIC24667	491	2.21	4.58	37.98	4.503	1.529	3	1.15878	1.01859	1.35519	1.20226	1.18371	1.18052	0.138607	0.1919	No	0.0094	Yes	0.0769	No		T303_07415	0.239423	1.11407	None	chromosome segregation protein SMC	Cell cycle control, cell division, chromosome partitioning
T303_04320	AIC24162	135	16.59	18.54	58.14	48.55	34.3	11	2.03236	1.02802	1.33045	0.672977	1.26595	1.17924	0.577284	0.9136	No	0.1837	No	0.4248	No		T303_04320	0.237852	0.371815	None	catabolite control protein A	Transcription
T303_08705	AIC24890	496	2.17	2.3	25.6	10.72	3.501	3	3.28095	1.27057	1.04713	0.376704	1.49384	1.15885	1.25049	0.7768	No	0.3303	No	0.4873	No		T303_08705	0.212695	0.312204	None	UDP-N-acetylmuramoyl-tripeptide--D-alanyl-D-alanine ligase	Cell wall/membrane/envelope biogenesis
T303_02365	AIC23832	358	5.47	5.59	46.36	30.91	23.64	4	1.43219	3.28095	0.405509	0.879023	1.49942	1.15561	1.25962	0.7723	No	0.3302	No	0.4857	No		T303_02365	0.208649	0.313632	None	cell division protein GpsB	not assigned
T303_07270	AIC24646	227	11.27	11.37	51.72	51.72	51.72	17	0.501187	0.990832	1.31826	2.18776	1.24951	1.15454	0.709916	0.8959	No	0.2689	No	0.5327	No		T303_07270	0.207324	0.273517	None	phosphocarrier protein HPr	Signal transduction mechanisms
T303_02195	AIC23805	33	38.98	40.98	66.3	57.77	52.3	31	1.40605	0.981748	1.31826	0.946237	1.16307	1.15	0.233106	0.3248	No	0.0431	Yes	0.2562	No		T303_02195	0.201637	0.591421	None	glucose-6-phosphate isomerase	Carbohydrate transport and metabolism
T303_01310	AIC23671	254	10.02	10.65	45.01	21.99	12.53	9	1.25892	0.887156	1.51356	1.03753	1.17429	1.14823	0.272897	0.4248	No	0.0591	No	0.2914	No		T303_01310	0.199407	0.53551	None	aminotransferase A	Amino acid transport and metabolism
T303_03390	AIC24003	28	40.95	41.96	50	29.59	19.27	25	1.11686	1.13763	1.15878	1.21339	1.15666	1.1482	0.0415078	0.0062	Yes	0.0003	Yes	0.0048	Yes		T303_03390	0.199377	2.31876	None	alanyl-tRNA synthase	Translation, ribosomal structure and biogenesis
T303_00125	AIC23502	267	9.37	9.59	50.22	34.8	32.16	10	1.59956	1.5417	0.751623	0.691831	1.14618	1.14666	0.491289	0.5756	No	0.2224	No	0.5937	No		T303_00125	0.19744	0.226433	None	2,3,4,5-tetrahydropyridine-2,6-carboxylate N-succinyltransferase	Amino acid transport and metabolism
T303_00140	AIC23504	517	2.05	2.08	18.77	7.22	5.776	2	1.00925	1.1695	1.11686	1.2942	1.14745	1.14318	0.118398	0.082	No	0.0078	Yes	0.0884	No		T303_00140	0.193054	1.05355	None	rRNA (guanine-N1)-methyltransferase	not assigned
T303_06510	AIC24509	347	5.76	5.83	69.7	28.79	28.79	5	1.5417	0.809096	1.47231	0.679204	1.12558	1.1407	0.44452	0.4899	No	0.2072	No	0.6116	No		T303_06510	0.189925	0.213533	None	50S ribosomal protein L35	Translation, ribosomal structure and biogenesis
T303_04155	AIC24132	410	4.13	4.22	48	26	16	2	1.08643	1.14815	1.1272	1.19124	1.13825	1.13768	0.043643	0.0051	Yes	0.0005	Yes	0.008	Yes		T303_04155	0.186089	2.09691	None	ribose 5-phosphate isomerase	not assigned
T303_04380	AIC24173	209	12.04	13.37	46.39	26.29	21.91	10	0.981748	1.0666	1.20226	1.2942	1.1362	1.13443	0.139077	0.0998	No	0.0133	Yes	0.145	No		T303_04380	0.181968	0.838632	None	chorismate synthase	Amino acid transport and metabolism
T303_09335	AIC25002	379	4.8	5.08	58.17	14.09	6.04	3	0.816582	1.36773	0.895365	1.44544	1.13128	1.13155	0.321089	0.3705	No	0.1094	No	0.4734	No		T303_09335	0.178296	0.324772	None	DEAD/DEAH box helicase	Replication, recombination and repair
T303_00045	AIC23491	108	19.96	20.01	72.34	67.38	67.38	15	1.58489	1.57036	0.691831	0.613762	1.11521	1.1311	0.534935	0.5393	No	0.2864	No	0.6957	No		T303_00045	0.177723	0.157578	None	50S ribosomal protein L11	Translation, ribosomal structure and biogenesis
T303_00315	AIC23534	355	5.52	5.92	47.11	41.32	26.45	3	1.04713	0.737904	1.44544	1.21339	1.11097	1.13026	0.297553	0.2935	No	0.1053	No	0.5099	No		T303_00315	0.176653	0.292515	None	hypothetical protein	Function unknown
T303_06515	AIC24510	280	8.54	9.86	73.86	38.64	32.39	8	1	1.05682	1.21339	1.19124	1.11536	1.12403	0.103445	0.0376	Yes	0.0068	Yes	0.112	No		T303_06515	0.168681	0.950782	None	translation initiation factor IF-3	Translation, ribosomal structure and biogenesis
T303_08540	AIC24860	445	3.14	3.62	42.25	17.65	8.021	2	1.08643	0.990832	1.28233	1.15878	1.12959	1.1226	0.12288	0.0694	No	0.0099	Yes	0.1255	No		T303_08540	0.166846	0.901356	None	GTP cyclohydrolase I	Coenzyme transport and metabolism
T303_00105	AIC23498	256	9.96	11.24	60.53	41.45	19.08	11	1.09648	1.09648	1.20226	1.14815	1.13584	1.12232	0.050539	0.0074	Yes	0.0007	Yes	0.0126	Yes		T303_00105	0.166479	1.89963	None	UDP glucose pyrophosphorylase	Cell wall/membrane/envelope biogenesis
T303_04255	AIC24150	363	5.22	5.32	35.76	28.48	13.94	3	1.1695	0.946237	1.31826	1.0666	1.12515	1.11805	0.157793	0.1134	No	0.0203	Yes	0.2109	No		T303_04255	0.160982	0.675923	None	metalloprotease	Translation, ribosomal structure and biogenesis
T303_08335	AIC24823	202	12.52	14.44	38.72	15.63	10.05	9	1	1	1.23595	1.34276	1.14468	1.11797	0.172658	0.1698	No	0.0224	Yes	0.1924	No		T303_08335	0.160886	0.715795	None	amino acid ABC transporter permease	Amino acid transport and metabolism
T303_04315	AIC24161	240	10.55	10.69	30.47	17.17	13.02	7	0.903649	0.816582	1.40605	1.33045	1.11418	1.11705	0.297124	0.2997	No	0.1029	No	0.4981	No		T303_04315	0.159696	0.302683	None	dipeptidase	Amino acid transport and metabolism
T303_04005	AIC24107	124	17.76	18.29	38.73	19.75	13.27	13	1.27057	0.862979	1.25893	0.972747	1.09131	1.11584	0.205283	0.1349	No	0.0517	No	0.4392	No		T303_04005	0.158125	0.357338	None	threonyl-tRNA synthase	Translation, ribosomal structure and biogenesis
T303_02085	AIC23787	456	2.91	3.06	14.39	5.854	4.39	2	0.981748	0.57544	2.10863	1.24738	1.2283	1.11457	0.64868	0.8392	No	0.2519	No	0.5322	No		T303_02085	0.156482	0.273925	None	cysteine desulfurase	Amino acid transport and metabolism
T303_03220	AIC23973	359	5.43	5.72	37.1	24.19	19.35	3	1.05682	0.847227	1.27057	1.1695	1.08603	1.11316	0.181571	0.0997	No	0.0398	Yes	0.4132	No		T303_03220	0.154659	0.38384	None	transposase	Function unknown
T303_05965	AIC24431	336	6.21	6.95	43.81	8.892	3.737	4	0.570164	1.0666	1.15878	2.65461	1.36254	1.11269	0.899332	0.8982	No	0.2787	No	0.4791	No		T303_05965	0.154047	0.319574	None	ATP-dependent DNA helicase PcrA	Replication, recombination and repair
T303_08175	AIC24791	494	2.19	3.82	33.91	31.3	10.43	2	1.41906	1.6293	0.619441	0.794328	1.11553	1.10669	0.484891	0.5021	No	0.2485	No	0.6663	No		T303_08175	0.146255	0.17633	None	cysteine desulfurase	not assigned
T303_01035	AIC23645	23	45.94	47.56	76.47	60.45	49.7	39	1.11686	0.887156	1.27057	1.08643	1.09025	1.10164	0.157572	0.0762	No	0.0267	Yes	0.3351	No		T303_01035	0.139659	0.474826	None	inosine 5'-monophosphate dehydrogenase	Nucleotide transport and metabolism
T303_01865	AIC23750	454	2.92	3.25	35.57	22.53	11.07	4	1.44544	1.28233	0.92045	0.698232	1.08661	1.10139	0.339368	0.2975	No	0.1582	No	0.6449	No		T303_01865	0.139326	0.190508	None	phosphomethylpyrimidine kinase	Coenzyme transport and metabolism
T303_03205	AIC23970	243	10.35	10.54	53.85	53.85	26.92	7	1.34276	1.34276	0.855067	0.83946	1.09501	1.09892	0.286149	0.2474	No	0.1072	No	0.5541	No		T303_03205	0.136081	0.256412	None	50S ribosomal protein L21	Translation, ribosomal structure and biogenesis
T303_02490	AIC23853	467	2.65	3.35	52.02	25.43	13.29	2	1.01859	1.01859	1.1695	1.1695	1.09405	1.09405	0.087127	0.0179	Yes	0.005	Yes	0.1197	No		T303_02490	0.129672	0.921906	None	metallophosphoesterase	General function prediction only
T303_06625	AIC24531	464	2.71	2.83	27.48	7.426	6.436	2	1.55597	2.37684	0.390841	0.625173	1.2372	1.09057	0.91128	0.8991	No	0.3799	No	0.6386	No		T303_06625	0.125082	0.194771	None	UDP-N-acetylmuramoylpentapeptide-lysine N(6)-alanyltransferase	Cell wall/membrane/envelope biogenesis
T303_06575	AIC25154	305	7.47	10.06	45.53	34.04	21.7	7	1.10662	1.19124	0.990832	1.0666	1.08882	1.08661	0.0834721	0.0149	Yes	0.0046	Yes	0.1232	No		T303_06575	0.119834	0.909389	None	cell division protein FtsE	Cell cycle control, cell division, chromosome partitioning
T303_02225	AIC23811	46	34.49	35.48	49.84	36.94	27.42	20	1.14815	1.00925	1.10662	1.0666	1.08266	1.08661	0.05919	0.0052	Yes	0.0018	Yes	0.0683	No		T303_02225	0.119834	1.16558	None	prolyl-tRNA synthetase	Translation, ribosomal structure and biogenesis
T303_05205	AIC24310	325	6.64	12.36	27.26	11.06	2.905	8	0.619441	0.92045	1.24738	1.78649	1.14344	1.08392	0.499538	0.5752	No	0.231	No	0.606	No		T303_05205	0.116254	0.217527	None	cell envelope serine proteinase	Posttranslational modification, protein turnover, chaperones
T303_08425	AIC24841	142	16.29	17.31	50	25.78	15.33	12	0.847227	1.2942	0.870964	1.31826	1.08266	1.08258	0.25852	0.1913	No	0.0937	No	0.568	No		T303_08425	0.114473	0.245652	None	septation ring formation regulator EzrA	Cell cycle control, cell division, chromosome partitioning
T303_05650	AIC24378	455	2.92	2.98	18.57	5.145	3.356	2	0.990832	1.03753	1.1272	1.18032	1.08397	1.08236	0.085603	0.015	Yes	0.0052	Yes	0.1446	No		T303_05650	0.114184	0.839832	None	tRNA (uracil-5-)-methyltransferase	Translation, ribosomal structure and biogenesis
T303_02245	AIC23815	3	87.05	87.17	92.76	89.98	79.78	88	1.07647	1.04713	1.10662	1.08643	1.07916	1.08145	0.0247675	0.0004	Yes	0.0001	Yes	0.0078	Yes		T303_02245	0.112961	2.10791	None	molecular chaperone GroEL	Posttranslational modification, protein turnover, chaperones
T303_04040	AIC24113	303	7.61	9.57	37.09	22.56	12.53	5	0.83946	0.772681	1.48594	1.30617	1.10106	1.07282	0.349508	0.3376	No	0.1538	No	0.6036	No		T303_04040	0.101402	0.219251	None	hydroxymethylglutaryl-CoA synthase	Lipid transport and metabolism
T303_08350	AIC24826	357	5.47	5.69	46.68	16.48	7.323	4	1.40605	0.625173	1.43219	0.737904	1.05033	1.07198	0.428454	0.3281	No	0.2808	No	0.8294	No		T303_08350	0.100273	0.081236	None	GTPase CgtA	Cell cycle control, cell division, chromosome partitioning
T303_02640	AIC23879	187	13.43	15.22	36.31	11.5	9.489	10	0.809096	1.33045	0.801678	1.33045	1.06792	1.06977	0.303163	0.2233	No	0.1433	No	0.6845	No		T303_02640	0.0973073	0.164627	None	NUDIX hydrolase	Coenzyme transport and metabolism
T303_06680	AIC24541	168	14.76	15.74	58.88	22.43	16.82	11	1.35519	1.10662	1.02802	0.824138	1.07849	1.06732	0.219542	0.1369	No	0.0669	No	0.5262	No		T303_06680	0.093993	0.278849	None	UDP-N-acetylglucosamine 1-carboxyvinyltransferase	Cell wall/membrane/envelope biogenesis
T303_08815	AIC24909	352	5.57	5.61	60.61	40.4	36.36	4	0.666667	1.22462	0.937562	1.03753	0.966593	0.987545	0.23267	0.0327	Yes	0.0147	Yes	0.3047	No		T303_08815	-0.0180813	0.516128	None	hypothetical protein	General function prediction only
T303_01095	AIC23653	443	3.21	3.3	29.52	5.727	3.965	3	1.0666	1.21339	0.972747	1.05682	1.07739	1.06171	0.099976	0.0211	Yes	0.0086	Yes	0.2193	No		T303_01095	0.0863854	0.658961	None	chromosomal replication initiation protein DnaA	Replication, recombination and repair
T303_06010	AIC24439	402	4.2	4.23	43.07	21.9	18.25	2	1.31826	1.95885	0.608135	0.801678	1.17173	1.05997	0.604317	0.6998	No	0.275	No	0.6096	No		T303_06010	0.0840201	0.214955	None	ArsR family transcriptional regulator	Inorganic ion transport and metabolism
T303_08080	AIC24774	466	2.66	3.25	19.48	7.468	4.221	2	0.981748	1.33045	0.83946	1.13763	1.07232	1.05969	0.210812	0.1196	No	0.0637	No	0.5419	No		T303_08080	0.083639	0.266081	None	peptide ABC transporter permease	Amino acid transport and metabolism
T303_04910	AIC24260	64	29.32	30.14	51.2	39.18	34.36	17	0.963829	0.903649	1.14815	1.18032	1.04899	1.05599	0.135963	0.0345	Yes	0.026	Yes	0.5232	No		T303_04910	0.078598	0.281332	None	cell division protein DivIVA	Cell cycle control, cell division, chromosome partitioning
T303_08555	AIC24863	516	2.05	2.79	39.02	20.73	15.85	2	1.35519	1.31826	0.787046	0.772681	1.05829	1.05265	0.32191	0.2302	No	0.1703	No	0.7412	No		T303_08555	0.0740277	0.130065	None	RNA-binding protein	General function prediction only
T303_08270	AIC24810	161	15.3	18.24	53.93	38.21	22.76	10	0.954993	1.03753	1.0666	1.1272	1.04658	1.05206	0.0715775	0.0058	Yes	0.0045	Yes	0.284	No		T303_08270	0.0732199	0.546682	None	RNA polymerase sigma factor RpoD	Transcription
T303_03085	AIC23949	143	16.25	16.8	73.21	39.56	32.4	18	1.48594	0.809096	1.2942	0.636796	1.05651	1.05165	0.399281	0.3097	No	0.2457	No	0.7956	No		T303_03085	0.072649	0.0993052	None	2-nitropropane dioxygenase	General function prediction only
T303_08595	AIC24869	452	2.97	3.05	32.64	11.87	9.199	2	0.870964	0.963829	1.13763	1.25893	1.05784	1.05073	0.173745	0.0686	No	0.045	Yes	0.5532	No		T303_08595	0.0713894	0.257118	None	lipid kinase	Lipid transport and metabolism
T303_07110	AIC24619	268	9.31	9.47	37.74	22.57	21.01	7	1.30617	0.794328	1.30617	0.751623	1.03957	1.05025	0.308334	0.1898	No	0.1777	No	0.814	No		T303_07110	0.0707322	0.0893756	None	HAD family hydrolase	Nucleotide transport and metabolism
T303_03720	AIC24057	514	2.06	2.69	33.12	6.169	6.169	3	0.937562	0.981748	1.11686	1.1695	1.05142	1.04931	0.109611	0.0201	Yes	0.0142	Yes	0.4174	No		T303_03720	0.0694349	0.379448	None	aspartate carbamoyltransferase catalytic subunit	Nucleotide transport and metabolism
T303_06925	AIC25157	507	2.12	2.17	45.27	8.108	8.108	2	1.02802	1.58489	0.660693	1.0666	1.08505	1.04731	0.380138	0.3403	No	0.1951	No	0.6849	No		T303_06925	0.0666831	0.164373	None	ArgR family transcriptional regulator	Transcription
T303_01655	AIC23714	311	7.26	8	30.77	11.61	9.717	8	1.10662	0.444631	2.31206	0.981748	1.21127	1.04419	0.78806	0.8363	No	0.3436	No	0.629	No		T303_01655	0.0623787	0.201349	None	polynucleotide phosphorylase	Translation, ribosomal structure and biogenesis
T303_06785	AIC24560	149	15.82	17.14	52.98	23.33	15.37	13	0.559758	0.990832	1.09648	1.95884	1.15148	1.04366	0.586176	0.6472	No	0.2832	No	0.641	No		T303_06785	0.061645	0.193142	None	ribonuclease J	Translation, ribosomal structure and biogenesis
T303_04395	AIC24176	185	13.62	13.82	50.16	33.33	29.84	13	1.01859	1.10662	0.981748	1.0666	1.04339	1.04259	0.0546254	0.0026	Yes	0.0021	Yes	0.2104	No		T303_04395	0.0601769	0.676954	None	L-2-hydroxyisocaproate dehydrogenase	Energy production and conversion
T303_03955	AIC24098	122	18.04	19.19	44.78	27.39	24.13	15	1.28233	0.57544	1.85353	0.801678	1.12825	1.042	0.566281	0.5869	No	0.2942	No	0.6813	No		T303_03955	0.0593615	0.166662	None	N-acetylglucosamine-1-phosphate uridyltransferase	Cell wall/membrane/envelope biogenesis
T303_04185	AIC24138	97	22.34	25.18	59.43	46.72	40.57	15	1.39316	1.1695	0.912011	0.724436	1.04978	1.04075	0.292728	0.1859	No	0.1511	No	0.7562	No		T303_04185	0.0576304	0.121363	None	peptide ABC transporter ATP-binding protein	Amino acid transport and metabolism
T303_07160	AIC24626	166	14.98	15.12	63.96	45.18	30.46	11	1.1695	1.2942	0.847227	0.912011	1.05573	1.04075	0.211296	0.1038	No	0.073	No	0.6343	No		T303_07160	0.0576304	0.197705	None	dTDP-4-keto-L-rhamnose reductase	Cell wall/membrane/envelope biogenesis
T303_03505	AIC24020	101	21.93	22.46	60.61	58.79	39.39	12	1.38038	1.2942	0.787046	0.737904	1.04988	1.04062	0.334332	0.2315	No	0.1917	No	0.7849	No		T303_03505	0.0574446	0.105186	None	F0F1 ATP synthase subunit B	Energy production and conversion
T303_00595	AIC23573	35	37.74	38.84	92.63	80.18	66.36	36	1.1695	1.20226	0.879023	0.903649	1.03861	1.03657	0.170877	0.055	No	0.0511	No	0.682	No		T303_00595	0.0518235	0.166216	None	30S ribosomal protein S3	Translation, ribosomal structure and biogenesis
T303_01390	AIC23684	342	5.94	7.35	39.94	20.66	11.02	6	0.448745	0.613762	1.45881	1.80302	1.08108	1.03629	0.653736	0.551	No	0.4104	No	0.8201	No		T303_01390	0.0514252	0.0861332	None	phosphoribosylaminoimidazole carboxylase	Nucleotide transport and metabolism
T303_06620	AIC24530	346	5.8	6.1	55.02	22.68	14.87	5	1.59956	0.704693	1.36773	0.630957	1.07573	1.03621	0.48137	0.4202	No	0.2925	No	0.7736	No		T303_06620	0.0513177	0.111484	None	sugar phosphate phosphatase	General function prediction only
T303_03895	AIC24086	409	4.13	4.46	40.35	18.86	12.28	4	0.83946	1.22462	0.847227	1.22462	1.03398	1.03592	0.220151	0.0944	No	0.0954	No	0.7777	No		T303_03895	0.050915	0.109188	None	membrane protein	Inorganic ion transport and metabolism
T303_04530	AIC24194	87	24.48	26.71	55.4	23.73	10.62	15	0.855067	1.00925	1.03753	1.1695	1.01784	1.02339	0.129044	0.0221	Yes	0.0309	Yes	0.8002	No		T303_04530	0.033357	0.0968015	None	CRISPR-associated protein Csn1	Defense mechanisms
T303_04960	AIC24269	215	11.9	12.15	35.93	25.07	17.27	9	1.00925	1.2942	0.831764	1.03753	1.04319	1.02339	0.190516	0.074	No	0.0637	No	0.6811	No		T303_04960	0.033357	0.166789	None	peptide chain release factor 1	Translation, ribosomal structure and biogenesis
T303_09695	AIC25068	382	4.73	5.6	43.42	43.42	43.42	5	0.963829	0.903649	1.13763	1.07647	1.02039	1.02015	0.106013	0.0133	Yes	0.0178	Yes	0.7261	No		T303_09695	0.0287772	0.139004	None	hypothetical protein	Transcription
T303_04915	AIC24261	63	30.16	33.03	39.94	21.96	15.82	21	1.01859	1.01859	1	1.0666	1.02594	1.01859	0.0284829	0.0003	Yes	0.0004	Yes	0.166	No		T303_04915	0.0265749	0.779892	None	isoleucyl-tRNA synthetase	Translation, ribosomal structure and biogenesis
T303_03530	AIC24025	169	14.72	14.92	94.59	72.3	50.68	10	0.648634	0.887156	1.14815	1.51356	1.04938	1.01765	0.370645	0.2692	No	0.2278	No	0.8072	No		T303_03530	0.0252483	0.0930188	None	F0F1 ATP synthase subunit epsilon	Energy production and conversion
T303_01815	AIC23741	414	4.08	4.18	43.18	26.14	26.14	3	1.70608	0.496592	1.51356	0.275423	0.997915	1.00508	0.716638	0.4611	No	0.5687	No	0.9957	No		T303_01815	0.00730572	0.00187149	None	hypothetical protein	Signal transduction mechanisms
T303_02290	AIC23820	546	1.91	2.03	29.31	29.31	29.31	2	0.704693	0.737904	1.27057	1.33045	1.01091	1.00424	0.335577	0.1834	No	0.2454	No	0.9523	No		T303_02290	0.00610295	0.0212262	None	preprotein translocase subunit SecE	Intracellular trafficking, secretion, and vesicular transport
T303_03635	AIC24041	40	35.8	36.57	53.39	34.07	24.34	21	1.13763	1.31826	0.751623	0.862979	1.01762	1.0003	0.257845	0.1162	No	0.1496	No	0.8999	No		T303_03635	0.000436727	0.0458057	None	glycyl-tRNA synthase subunit beta	Translation, ribosomal structure and biogenesis
T303_00425	AIC23547	498	2.16	2.48	22.84	6.383	2.553	3	0.928966	1.25892	0.77983	1.0666	1.00858	0.997781	0.203882	0.0646	No	0.1005	No	0.9382	No		T303_00425	-0.0032045	0.0277046	None	cadmium transporter	Inorganic ion transport and metabolism
T303_01415	AIC23687	167	14.92	16.64	55.6	26.47	16.87	11	1.38038	0.847227	1.14815	0.772681	1.03711	0.997691	0.280563	0.1576	No	0.1522	No	0.8085	No		T303_01415	-0.00333572	0.09232	None	arginyl-tRNA synthetase	Translation, ribosomal structure and biogenesis
T303_05260	AIC24318	430	3.62	6.27	38.49	18.18	12.19	13	0.60256	1.19124	0.801678	1.59956	1.04876	0.99646	0.441144	0.3374	No	0.2944	No	0.8392	No		T303_05260	-0.00511617	0.0761345	None	heme ABC transporter ATP-binding protein	General function prediction only
T303_08695	AIC24888	370	5	5.42	28.02	14.79	7.004	6	1.05682	0.855067	1.14815	0.928966	0.997251	0.992892	0.130638	0.0189	Yes	0.0397	Yes	0.9691	No		T303_08695	-0.010291	0.0136314	None	peptide chain release factor 3	Translation, ribosomal structure and biogenesis
T303_04295	AIC24157	299	7.72	8.12	42.96	9.914	5.875	6	1	1.49969	0.698232	0.981748	1.04492	0.990874	0.333173	0.2232	No	0.1965	No	0.8049	No		T303_04295	-0.0132265	0.0942581	None	ribonuclease R	Transcription
T303_04880	AIC24254	234	11.01	11.38	41.27	24.24	19	12	1.92309	1.27057	0.691831	0.457088	1.08565	0.981202	0.654647	0.5593	No	0.405	No	0.8105	No		T303_04880	-0.0273772	0.091247	None	cell division protein FtsA	Cell cycle control, cell division, chromosome partitioning
T303_03100	AIC23952	192	13.12	13.68	49.27	21.22	18.05	10	1.05682	0.870964	1.11686	0.903649	0.987074	0.980234	0.118534	0.0132	Yes	0.0349	Yes	0.8413	No		T303_03100	-0.0288023	0.0750491	None	3-oxoacyl-ACP synthase	Lipid transport and metabolism
T303_08580	AIC24867	489	2.24	3.01	30.18	13.45	5.091	2	0.954993	0.660694	1.45881	1	1.01863	0.977496	0.329787	0.1865	No	0.2276	No	0.9172	No		T303_08580	-0.0328369	0.037536	None	exodeoxyribonuclease	Replication, recombination and repair
T303_03485	AIC24017	116	18.53	19.04	40.54	22.08	12.34	13	0.717794	1.31826	0.672977	1.23595	0.986244	0.976871	0.338027	0.1604	No	0.2893	No	0.9403	No		T303_03485	-0.0337602	0.0267336	None	valyl-tRNA synthetase	Translation, ribosomal structure and biogenesis
T303_03640	AIC24042	425	3.99	4.17	67.06	60	29.41	2	0.630957	1.09648	0.855067	1.27057	0.963269	0.975772	0.279476	0.095	No	0.259	No	0.8097	No		T303_03640	-0.0353835	0.0916759	None	hypothetical protein	Function unknown
T303_00120	AIC23501	475	2.52	2.9	18.83	13.26	10.61	5	1.05682	0.946237	1	0.895365	0.974605	0.973119	0.0694925	0.0026	Yes	0.0097	Yes	0.5178	No		T303_00120	-0.0393125	0.285838	None	N-acetyldiaminopimelate deacetylase	General function prediction only
T303_04665	AIC24220	22	48.38	48.57	53.82	48.14	39.92	26	0.847227	1.10662	0.855067	1.08643	0.973836	0.970746	0.141945	0.0194	Yes	0.0634	No	0.7369	No		T303_04665	-0.042834	0.132591	None	lysyl-tRNA synthetase	Translation, ribosomal structure and biogenesis
T303_08245	AIC24805	503	2.13	2.29	46.72	14.85	7.86	3	0.847227	1.07647	0.855067	1.08643	0.966296	0.965766	0.133063	0.0153	Yes	0.0594	No	0.6473	No		T303_08245	-0.0502546	0.188894	None	glycosyl transferase	not assigned
T303_06600	AIC24526	406	4.17	4.36	25.5	8.949	2.573	3	0.660694	0.666807	1.27057	1.25893	0.96425	0.962866	0.347029	0.1484	No	0.3428	No	0.85	No		T303_06600	-0.0545929	0.0705811	None	ATPase	Inorganic ion transport and metabolism
T303_03520	AIC24023	113	18.78	20.09	52.4	39.73	35.27	19	0.887156	0.794328	1.05682	1.03753	0.943958	0.962342	0.125311	0.0108	Yes	0.0685	No	0.437	No		T303_03520	-0.0553781	0.359519	None	F0F1 ATP synthase subunit gamma	Energy production and conversion
T303_06190	AIC24470	437	3.37	5.01	40.65	18.99	7.418	2	0.847227	0.529663	1.70608	1.07647	1.03986	0.961846	0.497527	0.3725	No	0.3562	No	0.8829	No		T303_06190	-0.0561217	0.0540885	None	TPP-dependent acetoin dehydrogenase complex, E1 protein subunit beta	Energy production and conversion
T303_04125	AIC24128	11	64.56	64.67	69.5	62.5	61.25	49	0.990832	1.05682	0.83946	0.928966	0.954019	0.959899	0.0925099	0.0049	Yes	0.0281	Yes	0.3935	No		T303_04125	-0.0590452	0.405055	None	30S ribosomal protein S1	Translation, ribosomal structure and biogenesis
T303_09380	AIC25010	446	3.05	3.73	28.85	11.06	4.087	2	0.990832	0.862979	1.07647	0.928966	0.964811	0.959899	0.0909184	0.0052	Yes	0.0231	Yes	0.4953	No		T303_09380	-0.0590452	0.305132	None	gamma-glutamyl phosphate reductase	Amino acid transport and metabolism
T303_08020	AIC24762	490	2.22	2.5	46.62	19.61	4.18	2	1.11686	0.744732	1.20226	0.801678	0.966384	0.959271	0.226966	0.0605	No	0.1807	No	0.7864	No		T303_08020	-0.0599903	0.104356	None	methionyl-tRNA formyltransferase	Translation, ribosomal structure and biogenesis
T303_01475	AIC23699	225	11.46	11.71	54.35	22.96	14.78	9	0.794328	0.737904	1.36773	1.11686	1.00421	0.955596	0.294282	0.1379	No	0.2085	No	0.979	No		T303_01475	-0.0655277	0.00921731	None	recombinase RecA	Replication, recombination and repair
T303_03540	AIC24027	12	59.64	60.23	67.34	62.06	59.8	82	0.981748	0.981748	0.92045	0.92045	0.951099	0.951099	0.0353906	0.0003	Yes	0.002	Yes	0.0699	No		T303_03540	-0.072333	1.15552	None	elongation factor Tu	Translation, ribosomal structure and biogenesis
T303_02465	AIC23848	383	4.71	5.11	25.89	12.59	6.413	3	0.654636	0.549541	1.36773	1.24738	0.954822	0.95101	0.412492	0.1928	No	0.4344	No	0.8407	No		T303_02465	-0.0724679	0.075359	None	diaminopimelate decarboxylase	Amino acid transport and metabolism
T303_09700	AIC25069	272	9.19	12.13	51.43	26.79	12.32	8	0.928966	1.23595	0.787046	0.972747	0.981177	0.950857	0.187431	0.0424	Yes	0.1087	No	0.8537	No		T303_09700	-0.0727	0.0686947	None	mRNA degradation ribonuclease J1/J2, metallo-beta-lactamase superfamily enzyme	Translation, ribosomal structure and biogenesis
T303_09635	AIC25056	504	2.12	3.86	42.89	12.63	3.641	4	0.831764	0.77983	1.0666	1.07647	0.938664	0.94918	0.154932	0.0186	Yes	0.1165	No	0.4863	No		T303_09635	-0.0752465	0.313096	None	DNA polymerase I	Replication, recombination and repair
T303_02635	AIC23878	558	1.7	3.2	38.21	5.711	2.181	3	0.698232	0.758578	1.13763	1.27057	0.966253	0.948102	0.281037	0.098	No	0.2554	No	0.8257	No		T303_02635	-0.0768852	0.0831777	None	peptide synthetase	not assigned
T303_03140	AIC23959	542	1.96	5.22	34.77	22.43	4.486	5	0.954993	1.05682	0.847227	0.937562	0.94915	0.946277	0.0859245	0.0038	Yes	0.0248	Yes	0.3218	No		T303_03140	-0.0796651	0.492414	None	ribonuclease	Translation, ribosomal structure and biogenesis
T303_05990	AIC24436	493	2.2	2.22	40.29	17.96	6.796	2	0.903649	0.937562	0.954993	0.981748	0.944488	0.946277	0.0327333	0.0002	Yes	0.0017	Yes	0.0427	Yes		T303_05990	-0.0796651	1.36957	None	type I restriction endonuclease subunit S	not assigned
T303_03630	AIC24040	327	6.59	6.71	32.46	17.05	12.79	5	0.660694	0.887156	1	1.33045	0.969576	0.943578	0.278903	0.0986	No	0.2463	No	0.8413	No		T303_03630	-0.0837863	0.0750491	None	glycyl-tRNA synthase subunit alpha	Translation, ribosomal structure and biogenesis
T303_05040	AIC24282	328	6.51	6.8	24.15	7.289	4.214	5	0.49204	0.465586	1.72187	1.39316	1.01816	0.942598	0.637173	0.4415	No	0.4915	No	0.9581	No		T303_05040	-0.0852853	0.0185892	None	Ca2+, Mn2+-P-type ATPase	Inorganic ion transport and metabolism
T303_02065	AIC23783	521	2.04	2.1	24.5	7.229	5.622	2	0.787046	1.14815	0.758578	1.09648	0.947564	0.941762	0.203219	0.0404	Yes	0.1775	No	0.6414	No		T303_02065	-0.0865656	0.192871	None	adapter protein mecA	Signal transduction mechanisms
T303_09585	AIC25047	162	15.28	16.19	91.14	67.09	59.49	11	1.31826	0.954993	0.92045	0.666807	0.965126	0.937721	0.268201	0.0879	No	0.2401	No	0.8116	No		T303_09585	-0.0927692	0.090658	None	30S ribosomal protein S18	Translation, ribosomal structure and biogenesis
T303_00100	AIC23497	337	6.19	6.92	43.53	21.18	13.24	6	1.22462	1.02802	0.847227	0.672977	0.943209	0.937622	0.23708	0.0572	No	0.2384	No	0.6646	No		T303_00100	-0.0929222	0.17744	None	NAD(P)H-dependent glycerol-3-phosphate dehydrogenase	Energy production and conversion
T303_04565	AIC24201	549	1.82	2.84	40.85	6.62	3.944	4	1.28233	2.208	0.328095	0.591562	1.1025	0.936946	0.839691	0.6701	No	0.4853	No	0.8229	No		T303_04565	-0.0939617	0.0846529	None	S1 RNA-binding protein	Transcription
T303_02670	AIC23883	154	15.56	17.75	53.24	34.37	24.51	12	1.05682	1.67494	0.534564	0.816582	1.02073	0.9367	0.485568	0.3334	No	0.3764	No	0.9373	No		T303_02670	-0.0943407	0.0281214	None	methionine ABC transporter ATP-binding protein	Amino acid transport and metabolism
T303_08960	AIC24936	258	9.78	10.16	37.92	22.29	12.29	7	0.613762	0.794328	1.07647	1.33045	0.953752	0.935397	0.315157	0.1155	No	0.3261	No	0.7883	No		T303_08960	-0.0963497	0.103308	None	aspartyl/glutamyl-tRNA amidotransferase subunit B	Translation, ribosomal structure and biogenesis
T303_01675	AIC23718	266	9.38	9.8	40.94	17.67	10.96	7	0.990832	0.554626	1.69044	0.879023	1.02873	0.934927	0.47836	0.3392	No	0.3573	No	0.912	No		T303_01675	-0.097074	0.0400052	None	cysteinyl-tRNA synthease	Translation, ribosomal structure and biogenesis
T303_08305	AIC24817	570	1.47	3.49	50.36	25.18	7.554	4	1.15878	0.912011	0.954993	0.751623	0.944351	0.933502	0.167612	0.024	Yes	0.1278	No	0.5542	No		T303_08305	-0.0992755	0.256333	None	amino acid ABC transporter substrate-binding protein	Amino acid transport and metabolism
T303_00025	AIC23488	83	25.11	27.12	39.1	34.59	27.32	21	1.01859	0.731139	1.09648	0.847227	0.923359	0.932909	0.16511	0.0197	Yes	0.1587	No	0.4217	No		T303_00025	-0.100191	0.374996	None	argininosuccinate synthase	Amino acid transport and metabolism
T303_08415	AIC24839	288	8.28	10.34	50.07	17.15	3.89	8	0.83946	0.394457	2.0893	1.01859	1.08545	0.929026	0.718832	0.5926	No	0.4437	No	0.8274	No		T303_08415	-0.10621	0.0822845	None	CRISPR-associated protein Csn1	Defense mechanisms
T303_00490	AIC23552	165	15.04	15.1	76.56	62.5	58.59	9	0.92045	1.04713	0.809096	0.937562	0.928559	0.929006	0.0974288	0.0047	Yes	0.0467	Yes	0.2388	No		T303_00490	-0.10624	0.621966	None	50S ribosomal protein L17	Translation, ribosomal structure and biogenesis
T303_07245	AIC24641	286	8.31	8.68	39.17	18.61	12.5	7	0.570164	1.48594	0.501187	1.28233	0.959905	0.926247	0.497657	0.2651	No	0.4992	No	0.8822	No		T303_07245	-0.11053	0.0544329	None	RNA helicase	Replication, recombination and repair
T303_01980	AIC23768	251	10.09	12.02	43.44	18.27	10.15	8	0.794328	0.765597	1.1272	1.05682	0.935985	0.925573	0.182813	0.0283	Yes	0.1656	No	0.5341	No		T303_01980	-0.111582	0.272377	None	GTP pyrophosphokinase	Transcription
T303_08160	AIC24788	500	2.15	2.29	38.99	11.47	8.716	3	0.963829	1.00925	0.83946	0.887156	0.924925	0.925492	0.0760603	0.0022	Yes	0.0263	Yes	0.1429	No		T303_08160	-0.111707	0.844968	None	adenylate cyclase	Function unknown
T303_00950	AIC23628	92	23.06	24.45	88.16	72.37	67.11	13	0.946237	0.698232	1.19124	0.903649	0.93484	0.924943	0.202343	0.0365	Yes	0.2001	No	0.5654	No		T303_00950	-0.112563	0.247644	None	50S ribosomal protein L9	Translation, ribosomal structure and biogenesis
T303_02315	AIC23824	253	10.02	12.4	34.21	12.85	9.484	9	1.09648	0.903649	0.946237	0.772681	0.929761	0.924943	0.133444	0.0115	Yes	0.0953	No	0.3698	No		T303_02315	-0.112563	0.432033	None	leucyl-tRNA synthase	Translation, ribosomal structure and biogenesis
T303_06505	AIC24508	306	7.43	7.65	90.76	27.73	18.49	4	0.870964	0.879022	0.963829	1.00925	0.930767	0.921426	0.0670996	0.0016	Yes	0.0171	Yes	0.131	No		T303_06505	-0.11806	0.882729	None	50S ribosomal protein L20	Translation, ribosomal structure and biogenesis
T303_07890	AIC24742	351	5.61	5.78	36.08	15.46	6.443	4	0.711214	0.580764	1.21339	1.1272	0.908141	0.919206	0.309364	0.0852	No	0.4353	No	0.5944	No		T303_07890	-0.121541	0.225921	None	galactokinase	Carbohydrate transport and metabolism
T303_06485	AIC24505	138	16.49	16.8	30.77	20.51	14.1	9	1.15878	1.2942	0.580764	0.679204	0.928235	0.91899	0.351108	0.1245	No	0.4318	No	0.7101	No		T303_06485	-0.121878	0.14868	None	dipeptidase PepV	Amino acid transport and metabolism
T303_03780	AIC24067	38	36.52	36.69	85.71	64.02	63.49	20	0.903649	0.928966	0.895365	0.928966	0.914237	0.916308	0.0173414	< 0.0001	Yes	0.0005	Yes	0.0022	Yes		T303_03780	-0.126096	2.65758	None	50S ribosomal protein L10	Translation, ribosomal structure and biogenesis
T303_03450	AIC24013	231	11.13	11.51	60.05	20.09	13.55	8	0.77983	0.903649	0.928966	1	0.903111	0.916308	0.0917505	0.0032	Yes	0.0615	No	0.1251	No		T303_03450	-0.126096	0.902743	None	homoserine dehydrogenase	Amino acid transport and metabolism
T303_08285	AIC24813	246	10.25	10.68	70.69	58.62	50	8	1.8197	1.08643	0.737904	0.42462	1.01716	0.912165	0.599432	0.415	No	0.4687	No	0.9579	No		T303_08285	-0.132633	0.0186798	None	30S ribosomal protein S21	not assigned
T303_01350	AIC23679	524	2.03	2.16	25	15.76	15.76	3	0.972747	1.45881	0.559758	0.847227	0.959637	0.909987	0.375006	0.1671	No	0.3846	No	0.8434	No		T303_01350	-0.136082	0.0739664	None	phosphoribosylglycinamide formyltransferase	Nucleotide transport and metabolism
T303_01430	AIC23690	505	2.12	2.38	25.23	5.986	2.23	4	0.928966	0.787046	1.03753	0.887156	0.910174	0.908061	0.103703	0.0049	Yes	0.0726	No	0.1816	No		T303_01430	-0.139139	0.740884	None	DNA mismatch repair protein MutS	Replication, recombination and repair
T303_06845	AIC24570	27	41.42	42.66	68.73	59.29	59.29	36	0.83946	0.903649	0.903649	0.912011	0.889692	0.903649	0.0337194	0.0002	Yes	0.0056	Yes	0.0073	Yes		T303_06845	-0.146165	2.13668	None	6-phosphofructokinase	Carbohydrate transport and metabolism
T303_00935	AIC23625	66	29.01	29.23	76.52	58.26	47.83	27	0.809096	0.879022	0.92045	0.981748	0.897579	0.899736	0.0725283	0.0016	Yes	0.0384	Yes	0.0665	No		T303_00935	-0.152426	1.17718	None	30S ribosomal protein S4	Translation, ribosomal structure and biogenesis
T303_09530	AIC25037	210	12.03	12.13	59.68	38.17	38.17	12	0.77983	0.724436	1.14815	1.01859	0.917753	0.899211	0.199706	0.0314	Yes	0.2336	No	0.4705	No		T303_09530	-0.153269	0.32744	None	elongation factor P	Translation, ribosomal structure and biogenesis
T303_09590	AIC25048	421	4.03	4.03	18.02	11.63	11.63	4	0.809096	0.946237	0.847227	0.990832	0.898348	0.896732	0.0845102	0.0025	Yes	0.0551	No	0.0954	No		T303_09590	-0.157251	1.02045	None	single-stranded DNA-binding protein	Replication, recombination and repair
T303_01730	AIC23728	137	16.55	18.53	78.38	72.3	58.78	29	0.912011	0.92045	0.879023	0.879023	0.897626	0.895517	0.0217564	< 0.0001	Yes	0.0013	Yes	0.0025	Yes		T303_01730	-0.159208	2.60206	None	50S ribosomal protein L13	Translation, ribosomal structure and biogenesis
T303_03280	AIC23984	556	1.76	1.89	22.97	3.547	2.872	2	0.981748	0.751623	1.04713	0.809096	0.897399	0.895422	0.13974	0.0104	Yes	0.1639	No	0.2383	No		T303_03280	-0.15936	0.622876	None	ABC transporter	Defense mechanisms
T303_01050	AIC23648	141	16.4	20.56	46.3	26.85	15.93	16	0.816582	0.685488	1.22462	0.972747	0.924858	0.894665	0.231783	0.048	Yes	0.2718	No	0.5629	No		T303_01050	-0.160581	0.249569	None	ABC transporter ATP-binding protein	General function prediction only
T303_06690	AIC24543	388	4.57	4.81	27.3	12.46	6.528	3	0.758578	1.1272	0.666807	1.01859	0.892793	0.888584	0.215912	0.0326	Yes	0.3353	No	0.3939	No		T303_06690	-0.170419	0.404614	None	UDP-galactose-4-epimerase	Cell wall/membrane/envelope biogenesis
T303_02595	AIC23870	420	4.04	4.17	59.52	29.76	23.21	6	0.862979	0.847227	0.928966	0.912011	0.887796	0.887495	0.0389148	0.0002	Yes	0.0089	Yes	0.0104	Yes		T303_02595	-0.17219	1.98297	None	urease accessory protein UreE	Posttranslational modification, protein turnover, chaperones
T303_08970	AIC24938	394	4.48	4.51	35	35	25	2	0.685488	0.824138	0.946237	1.13763	0.898373	0.885188	0.191802	0.0248	Yes	0.2707	No	0.367	No		T303_08970	-0.175945	0.435334	None	glutamyl-tRNA amidotransferase subunit C	Translation, ribosomal structure and biogenesis
T303_03210	AIC23971	257	9.87	10.91	77.08	62.5	47.92	13	1.43219	1.07647	0.691831	0.519996	0.93012	0.884148	0.407624	0.1672	No	0.4874	No	0.7543	No		T303_03210	-0.17764	0.122456	None	50S ribosomal protein L27	Translation, ribosomal structure and biogenesis
T303_03120	AIC23956	482	2.36	2.81	26.04	13.89	5.556	3	0.946237	0.751623	1.02802	0.816582	0.885615	0.88141	0.12473	0.0069	Yes	0.1588	No	0.164	No		T303_03120	-0.182115	0.785156	None	acetyl-CoA carboxylase subunit beta	Lipid transport and metabolism
T303_02475	AIC23850	255	10	10.01	60.49	58.02	58.02	7	1.31826	1.05682	0.704693	0.57544	0.913802	0.880756	0.337764	0.1063	No	0.4548	No	0.645	No		T303_02475	-0.183186	0.19044	None	hypothetical protein	Function unknown
T303_08965	AIC24937	350	5.66	6.03	41.6	23.57	9.016	6	0.847227	1.45881	0.586138	0.912011	0.951048	0.879619	0.366646	0.1531	No	0.3943	No	0.8068	No		T303_08965	-0.185049	0.0932341	None	aspartyl/glutamyl-tRNA amidotransferase subunit A	Translation, ribosomal structure and biogenesis
T303_03295	AIC23985	179	14.02	14.95	66.94	31.02	24.08	10	0.625173	0.862979	0.895365	1.34276	0.93157	0.879172	0.299431	0.0908	No	0.3575	No	0.6787	No		T303_03295	-0.185783	0.168322	None	uridylate kinase	Nucleotide transport and metabolism
T303_07345	AIC24656	65	29.21	29.78	38.11	36.59	34.76	22	1.03753	0.887156	0.870964	0.717794	0.87836	0.87906	0.130701	0.0076	Yes	0.1934	No	0.1596	No		T303_07345	-0.185967	0.796967	None	lactate dehydrogenase	Energy production and conversion
T303_08070	AIC24772	354	5.55	6.55	34.39	21.66	12.42	6	0.928966	0.870964	0.887156	0.824138	0.877806	0.87906	0.0433277	0.0003	Yes	0.0153	Yes	0.011	Yes		T303_08070	-0.185967	1.95861	None	peptide ABC transporter ATP-binding protein	not assigned
T303_09095	AIC24962	219	11.8	17.41	64.78	46.15	27.53	10	0.879022	0.928966	0.879023	0.862979	0.887497	0.879023	0.0286618	< 0.0001	Yes	0.0037	Yes	0.0043	Yes		T303_09095	-0.186028	2.36653	None	amino acid ABC transporter ATP-binding protein	Amino acid transport and metabolism
T303_08340	AIC24824	289	8.11	12.15	46.75	40.65	30.08	8	0.608135	0.586138	1.14815	1.19124	0.883417	0.878144	0.331158	0.0865	No	0.5399	No	0.5321	No		T303_08340	-0.18747	0.274007	None	peptide ABC transporter ATP-binding protein	Amino acid transport and metabolism
T303_01620	AIC23708	48	33.99	35.11	72.55	61.18	54.9	36	1.18032	1.04713	0.704693	0.60256	0.883676	0.875911	0.274333	0.0561	No	0.4652	No	0.4587	No		T303_01620	-0.191144	0.338471	None	30S ribosomal protein S2	Translation, ribosomal structure and biogenesis
T303_08060	AIC24770	485	2.29	2.39	41.81	15.52	6.466	3	0.912011	1.01859	0.758578	0.83946	0.88216	0.875735	0.110454	0.0048	Yes	0.1334	No	0.1226	No		T303_08060	-0.191433	0.91151	None	multidrug ABC transporter ATP-binding protein	Defense mechanisms
T303_00270	AIC23527	7	72.08	72.25	67.66	39.27	29.79	45	0.816582	0.724436	1.02802	0.928966	0.8745	0.872774	0.132171	0.0076	Yes	0.2093	No	0.1538	No		T303_00270	-0.196319	0.813044	None	DNA-directed RNA polymerase subunit beta'	Transcription
T303_02200	AIC23806	238	10.86	12.02	48.13	37.76	21.99	7	1.03753	0.679204	1.0666	0.704693	0.872005	0.871111	0.20851	0.0262	Yes	0.3968	No	0.3071	No		T303_02200	-0.199072	0.51272	None	hypothetical protein	Transcription
T303_00020	AIC23487	213	11.94	12.28	45.42	19.35	11.2	8	1.14815	0.534564	1.41906	0.591562	0.923334	0.869858	0.431084	0.1789	No	0.5262	No	0.7456	No		T303_00020	-0.201148	0.127494	None	argininosuccinate lyase	Amino acid transport and metabolism
T303_03660	AIC24045	235	10.91	11.48	65.48	51.98	30.56	8	1.28233	0.457088	1.31826	0.413047	0.867681	0.86971	0.500077	0.1823	No	0.72	No	0.6333	No		T303_03660	-0.201394	0.198391	None	peptidyl-prolyl cis-trans isomerase	Posttranslational modification, protein turnover, chaperones
T303_02785	AIC23901	110	19.46	20.45	58.28	37.87	24.26	16	1.10662	0.809096	0.92045	0.660693	0.874216	0.864773	0.187957	0.0201	Yes	0.3452	No	0.2732	No		T303_02785	-0.209607	0.563519	None	seryl-tRNA synthase	Translation, ribosomal structure and biogenesis
T303_09770	AIC25079	8	68.49	68.31	75.76	55.27	46.03	78	0.928966	0.831764	0.895365	0.794328	0.862606	0.863564	0.0608001	0.0007	Yes	0.0545	No	0.0203	Yes		T303_09770	-0.211625	1.6925	None	elongation factor P	Translation, ribosomal structure and biogenesis
T303_06655	AIC24536	68	28.2	28.64	62.09	54.15	43.68	20	1.00925	1.27057	0.554626	0.717794	0.888062	0.863524	0.316846	0.0804	No	0.5076	No	0.5308	No		T303_06655	-0.211692	0.275069	None	glutamine ABC transporter substrate-binding protein	Amino acid transport and metabolism
T303_02950	AIC23932	170	14.58	14.92	68.22	44.92	34.32	9	0.981748	0.515229	1.52757	0.744732	0.942319	0.86324	0.434172	0.198	No	0.4835	No	0.8077	No		T303_02950	-0.212166	0.0927499	None	amino acid ABC transporter ATPase	Amino acid transport and metabolism
T303_00300	AIC23532	396	4.38	5.38	34.09	7.168	6.469	6	1.23595	1.07647	0.648634	0.554626	0.878918	0.86255	0.328984	0.0832	No	0.5525	No	0.515	No		T303_00300	-0.21332	0.288193	None	acetolactate synthase	Amino acid transport and metabolism
T303_00555	AIC23565	75	26.66	28.21	97.73	96.21	78.79	23	1.09648	0.809096	0.912011	0.679204	0.874197	0.860553	0.176162	0.0169	Yes	0.3189	No	0.2485	No		T303_00555	-0.216663	0.604674	None	30S ribosomal protein S8	Translation, ribosomal structure and biogenesis
T303_07195	AIC24632	160	15.35	16.76	44	31.11	24.22	14	0.717794	0.724436	1.11686	0.990832	0.887481	0.857634	0.198893	0.0255	Yes	0.3198	No	0.3401	No		T303_07195	-0.221566	0.468393	None	phosphoglucosamine mutase	Carbohydrate transport and metabolism
T303_02900	AIC23922	320	6.95	7.24	36.66	19.2	10.22	7	0.432514	0.586138	1.1272	1.99526	1.03528	0.856668	0.705944	0.5077	No	0.5057	No	0.9267	No		T303_02900	-0.223192	0.0330608	None	cysteine desulfhydrase	Amino acid transport and metabolism
T303_00570	AIC23568	91	23.22	27.37	99.01	94.06	87.13	24	1.15878	1.13763	0.57544	0.564937	0.859195	0.856533	0.333855	0.0776	No	0.6272	No	0.4609	No		T303_00570	-0.223418	0.336393	None	50S ribosomal protein L24	Translation, ribosomal structure and biogenesis
T303_01650	AIC23713	510	2.07	2.22	36.97	6.398	3.555	2	0.765597	0.564937	1.28233	0.946237	0.889775	0.855917	0.304537	0.0742	No	0.4863	No	0.5215	No		T303_01650	-0.224457	0.282746	None	D-alanyl-D-alanine carboxypeptidase	Cell wall/membrane/envelope biogenesis
T303_02910	AIC23924	245	10.27	11.04	84.21	44.5	32.06	8	0.946237	0.672977	0.887156	0.824138	0.832627	0.855647	0.117531	0.0041	Yes	0.3595	No	0.0652	No		T303_02910	-0.224912	1.18575	None	uracil phosphoribosyltransferase	Nucleotide transport and metabolism
T303_00220	AIC23518	405	4.17	4.78	46.8	13.05	10.84	6	0.972747	0.847227	0.862979	0.751623	0.858644	0.855103	0.0905947	0.0023	Yes	0.1428	No	0.0524	No		T303_00220	-0.22583	1.28067	None	acetate kinase	Energy production and conversion
T303_05610	AIC24370	441	3.27	4.19	59.15	27.82	9.859	3	0.794328	0.539511	1.43219	0.912011	0.919509	0.85317	0.375484	0.1358	No	0.4819	No	0.697	No		T303_05610	-0.229096	0.156767	None	ribosome biogenesis GTPase A	Translation, ribosomal structure and biogenesis
T303_00940	AIC23626	439	3.34	3.44	56	42	24	2	0.549541	0.847227	0.855067	1.31826	0.892523	0.851147	0.317459	0.0827	No	0.4938	No	0.5469	No		T303_00940	-0.23252	0.262092	None	hypothetical protein	Function unknown
T303_02025	AIC23775	111	19.45	20.39	93.52	74.07	33.33	18	1.28233	0.946237	0.751623	0.570164	0.887589	0.84893	0.304689	0.0733	No	0.4937	No	0.5141	No		T303_02025	-0.236282	0.288952	None	30S ribosomal protein S15	Translation, ribosomal structure and biogenesis
T303_02815	AIC23907	557	1.71	1.9	37.78	11.11	6.296	2	0.801678	0.660694	1.09648	0.895365	0.863554	0.848521	0.182799	0.0175	Yes	0.3779	No	0.2323	No		T303_02815	-0.236977	0.633951	None	HAD hydrolase	General function prediction only
T303_03155	AIC23961	419	4.04	4.23	29.7	12.54	8.581	3	0.92045	1.2942	0.559758	0.772681	0.886771	0.846565	0.309345	0.0756	No	0.5025	No	0.5171	No		T303_03155	-0.240307	0.286425	None	6-phosphofructokinase	Carbohydrate transport and metabolism
T303_08765	AIC24899	480	2.4	2.54	33.58	7.711	4.726	4	0.816582	0.744732	0.946237	0.870964	0.844629	0.843773	0.085213	0.0018	Yes	0.1748	No	0.0356	Yes		T303_08765	-0.245073	1.44855	None	tryptophan synthase subunit beta	Amino acid transport and metabolism
T303_09445	AIC25021	428	3.69	3.91	38.61	12.8	6.074	3	1.1695	0.946237	0.737904	0.549541	0.850795	0.842071	0.267195	0.0437	Yes	0.5845	No	0.3455	No		T303_09445	-0.247987	0.461552	None	haloacid dehalogenase	General function prediction only
T303_08740	AIC24894	391	4.5	4.73	45.4	18.68	5.172	3	0.731139	0.724436	0.963829	0.937562	0.839242	0.834351	0.129171	0.0057	Yes	0.3575	No	0.0886	No		T303_08740	-0.261274	1.05257	None	D-alanine--D-alanine ligase	Cell wall/membrane/envelope biogenesis
T303_04060	AIC24117	147	15.86	16.79	62.99	33.58	20.34	12	1.1695	0.630957	1.03753	0.580764	0.854687	0.834243	0.293045	0.0559	No	0.6006	No	0.3944	No		T303_04060	-0.261461	0.404063	None	ATP-dependent protease	Posttranslational modification, protein turnover, chaperones
T303_00620	AIC23578	82	25.19	27.19	71.5	61.84	61.84	16	0.691831	0.772681	0.887156	0.981748	0.833354	0.829918	0.127313	0.0052	Yes	0.3878	No	0.0791	No		T303_00620	-0.268959	1.10182	None	50S ribosomal protein L4	Translation, ribosomal structure and biogenesis
T303_05345	AIC24332	472	2.55	4.63	50.39	12.89	5.078	2	0.544503	0.801678	0.855067	1.44544	0.911672	0.828372	0.380799	0.1341	No	0.5086	No	0.6743	No		T303_05345	-0.271649	0.171147	None	cyclic nucleotide-binding protein	Function unknown
T303_05575	AIC24363	45	34.6	34.71	56.17	41.56	30.93	23	1.05682	0.724436	0.928966	0.654636	0.841214	0.826701	0.184963	0.0157	Yes	0.4929	No	0.1845	No		T303_05575	-0.274562	0.734004	None	GMP synthase	Nucleotide transport and metabolism
T303_08560	AIC24864	296	7.81	7.97	73.33	57.78	46.67	9	1.02802	1.55597	0.390841	0.625173	0.899999	0.826594	0.510377	0.215	No	0.6436	No	0.7213	No		T303_08560	-0.274749	0.141884	None	30S ribosomal protein S16	Translation, ribosomal structure and biogenesis
T303_08205	AIC24797	361	5.27	5.54	40.9	19.95	6.983	3	0.765597	0.515229	1.31826	0.887156	0.87156	0.826376	0.335649	0.0837	No	0.585	No	0.4998	No		T303_08205	-0.275129	0.301204	None	polysaccharide ABC exporter ATP-binding protein	Carbohydrate transport and metabolism
T303_02230	AIC23812	562	1.61	2.73	39.3	7.891	3.642	4	0.787046	0.887156	0.758578	0.862979	0.823939	0.825012	0.0609746	0.0006	Yes	0.1704	No	0.0103	Yes		T303_02230	-0.277513	1.98716	None	ABC transporter permease	General function prediction only
T303_03905	AIC24088	348	5.75	5.89	29.13	21.26	11.81	5	0.49204	0.660694	0.981748	1.21339	0.836967	0.821221	0.322853	0.0641	No	0.7029	No	0.3869	No		T303_03905	-0.284158	0.412401	None	peptidase M20	General function prediction only
T303_05530	AIC24361	451	2.97	4.86	64.11	24.4	10.53	3	0.92045	0.398107	1.77011	0.717794	0.951615	0.819122	0.5865	0.3203	No	0.578	No	0.8794	No		T303_05530	-0.28785	0.0558135	None	amino acid ABC transporter ATPase	Amino acid transport and metabolism
T303_09485	AIC25029	42	35.64	36.8	52.53	33.33	19.67	22	1.25892	0.879022	0.751623	0.57544	0.866253	0.815323	0.289866	0.058	No	0.551	No	0.4242	No		T303_09485	-0.294557	0.372429	None	preprotein translocase subunit SecA	Intracellular trafficking, secretion, and vesicular transport
T303_05665	AIC24381	532	2.01	2.06	35.05	9.278	9.278	2	0.608135	0.772681	0.855067	1.08643	0.830577	0.813874	0.199073	0.0181	Yes	0.5811	No	0.1873	No		T303_05665	-0.297123	0.727462	None	sulfurtransferase	Inorganic ion transport and metabolism
T303_08035	AIC24765	315	7.17	7.29	54.55	37.8	15.79	3	0.809096	0.666807	1.1272	0.816582	0.854921	0.812839	0.194157	0.0195	Yes	0.4423	No	0.2319	No		T303_08035	-0.298958	0.634699	None	guanylate kinase	Nucleotide transport and metabolism
T303_07265	AIC24645	61	30.35	30.98	47.31	31.2	21.84	21	0.954993	0.855067	0.758578	0.765597	0.833558	0.810332	0.0921046	0.0021	Yes	0.2567	No	0.0364	Yes		T303_07265	-0.303416	1.4389	None	phosphoenolpyruvate-protein phosphotransferase	Carbohydrate transport and metabolism
T303_09735	AIC25074	17	52.74	53.75	77.94	67.17	58.15	39	1.07647	1.01859	0.564937	0.597035	0.814257	0.807813	0.27071	0.0371	Yes	0.7611	No	0.2636	No		T303_09735	-0.307906	0.579055	None	phosphoglycerate kinase	Carbohydrate transport and metabolism
T303_00350	AIC23537	252	10.06	10.49	35.34	20.29	8.399	7	0.666807	0.990832	0.613762	0.946237	0.804409	0.806522	0.191615	0.014	Yes	0.7376	No	0.1339	No		T303_00350	-0.310214	0.873219	None	endopeptidase	Posttranslational modification, protein turnover, chaperones
T303_05360	AIC24335	511	2.07	2.13	30.36	12.21	8.581	2	0.448745	1.0666	0.539511	1.27057	0.831357	0.803053	0.399923	0.1009	No	0.7763	No	0.461	No		T303_05360	-0.316432	0.336299	None	sporulation protein	Transcription
T303_03370	AIC23999	195	12.92	13.34	30.45	13.98	11.48	9	0.787046	0.564937	1.08643	0.809096	0.811876	0.798071	0.213683	0.0197	Yes	0.7163	No	0.1765	No		T303_03370	-0.325411	0.753255	None	oligopeptidase PepB	Amino acid transport and metabolism
T303_07180	AIC24629	555	1.76	2.12	22.14	11.83	11.83	5	0.672977	0.487529	1.27057	0.92045	0.837882	0.796713	0.338615	0.072	No	0.7122	No	0.4089	No		T303_07180	-0.327868	0.388383	None	hypothetical protein	Coenzyme transport and metabolism
T303_00520	AIC23558	273	9.1	9.62	63.76	36.7	36.7	8	0.636796	1.05682	0.559758	0.954993	0.802091	0.795894	0.241048	0.0257	Yes	0.8026	No	0.1991	No		T303_00520	-0.329352	0.700929	None	adenylate kinase	Nucleotide transport and metabolism
T303_03995	AIC24106	539	1.99	2.3	31.59	9.091	2.727	2	0.972747	0.870964	0.717794	0.619441	0.795237	0.794379	0.157211	0.0077	Yes	0.7623	No	0.08	No		T303_03995	-0.332101	1.09691	None	1,2-diacylglycerol 3-glucosyltransferase	Cell wall/membrane/envelope biogenesis
T303_06415	AIC24496	476	2.51	2.59	45.68	14.4	6.584	2	0.519996	0.816582	0.758578	1.47231	0.891867	0.78758	0.407692	0.139	No	0.5898	No	0.6325	No		T303_06415	-0.344502	0.198939	None	epsB	Signal transduction mechanisms
T303_02895	AIC23921	375	4.88	5.07	23.35	15.66	7.418	4	0.534564	1.25892	0.483059	1.03753	0.828519	0.786046	0.380651	0.0895	No	0.7757	No	0.434	No		T303_02895	-0.347314	0.36251	None	cystathionine gamma-synthase	Amino acid transport and metabolism
T303_04345	AIC24166	13	57.62	58.35	80.18	69.12	66.59	91	1.34276	0.928966	0.642688	0.457088	0.842877	0.785827	0.385663	0.0985	No	0.7279	No	0.4748	No		T303_04345	-0.347716	0.323489	None	enolase	Carbohydrate transport and metabolism
T303_04230	AIC24146	483	2.35	3.45	58.8	23.94	8.803	4	0.244343	1.34276	0.21677	1.31826	0.780534	0.7813	0.635237	0.2005	No	0.9738	No	0.5392	No		T303_04230	-0.356052	0.26825	None	tetrahydrofolate dehydrogenase	Coenzyme transport and metabolism
T303_03785	AIC24068	90	23.56	23.72	96.06	93.7	70.87	19	0.887156	0.928966	0.625173	0.672977	0.778568	0.780066	0.151757	0.0063	Yes	0.9095	No	0.0616	No		T303_03785	-0.358331	1.21042	None	50S ribosomal protein L7/L12	Translation, ribosomal structure and biogenesis
T303_00605	AIC23575	144	16.19	16.3	85.87	78.26	78.26	12	1.21339	0.928966	0.630957	0.474242	0.811889	0.779962	0.32744	0.0585	No	0.8112	No	0.3339	No		T303_00605	-0.358524	0.476384	None	30S ribosomal protein S19	Translation, ribosomal structure and biogenesis
T303_00810	AIC23609	198	12.65	13.28	42.88	23.33	13.38	10	0.92045	0.981748	0.630957	0.636796	0.792488	0.778623	0.184866	0.0119	Yes	0.8174	No	0.1104	No		T303_00810	-0.361004	0.957031	None	aspartyl-tRNA synthetase	Translation, ribosomal structure and biogenesis
T303_00625	AIC23579	80	25.96	26.31	54.33	45.67	45.67	20	1.25892	0.963829	0.591562	0.409261	0.805894	0.777695	0.380104	0.0804	No	0.8592	No	0.3823	No		T303_00625	-0.362723	0.417596	None	50S ribosomal protein L3	Translation, ribosomal structure and biogenesis
T303_09595	AIC25049	157	15.48	15.74	95.83	93.75	54.17	13	0.737904	0.870964	0.698232	0.816582	0.780921	0.777243	0.0776042	0.0009	Yes	0.7823	No	0.011	Yes		T303_09595	-0.363562	1.95861	None	30S ribosomal protein S6	Translation, ribosomal structure and biogenesis
T303_00040	AIC23490	29	40.41	41.52	78.6	66.81	65.07	37	0.816582	0.862979	0.711214	0.737904	0.78217	0.777243	0.0700202	0.0007	Yes	0.7357	No	0.0084	Yes		T303_00040	-0.363562	2.07572	None	50S ribosomal protein L1	Translation, ribosomal structure and biogenesis
T303_03420	AIC24007	206	12.15	13.43	43	22.65	18.07	10	0.524808	0.937562	0.613762	1.41906	0.873797	0.775662	0.40447	0.1257	No	0.6407	No	0.5768	No		T303_03420	-0.3665	0.238975	None	diaminopimelate aminotransferase	Amino acid transport and metabolism
T303_03350	AIC23996	89	23.78	25.64	44.98	26.39	19.04	13	1.13763	0.724436	0.824138	0.515229	0.800357	0.774287	0.259087	0.0308	Yes	0.8254	No	0.2209	No		T303_03350	-0.36906	0.655804	None	methionyl-tRNA synthetase	Translation, ribosomal structure and biogenesis
T303_00500	AIC23554	159	15.38	15.43	58.27	55.12	54.33	11	0.77983	1.35519	0.47863	0.765597	0.844811	0.772713	0.367456	0.0895	No	0.7083	No	0.4603	No		T303_00500	-0.371995	0.336959	None	30S ribosomal protein S11	Translation, ribosomal structure and biogenesis
T303_08455	AIC24846	321	6.94	7.31	100	62.39	39.32	5	0.559758	0.654636	0.887156	1.02802	0.782392	0.770896	0.213849	0.0168	Yes	0.9096	No	0.1347	No		T303_08455	-0.375392	0.870632	None	arsenate reductase	Inorganic ion transport and metabolism
T303_06400	AIC24494	563	1.59	3.07	29.67	7.473	4.835	4	0.895365	0.519996	1.07647	0.642688	0.783628	0.769026	0.25007	0.0258	Yes	0.9154	No	0.182	No		T303_06400	-0.378895	0.739929	None	epsE	Cell wall/membrane/envelope biogenesis
T303_05955	AIC24429	380	4.78	5.24	38.6	17.98	10.75	7	0.717794	1.10662	0.510505	0.816582	0.787876	0.767188	0.247838	0.0257	Yes	0.8898	No	0.1855	No		T303_05955	-0.382347	0.731656	None	tRNA modification GTPase	Translation, ribosomal structure and biogenesis
T303_03235	AIC23975	474	2.52	4.34	47.26	10.45	9.204	6	0.642688	0.879022	0.654636	0.895365	0.767928	0.766829	0.137964	0.0045	Yes	0.9864	No	0.0436	Yes		T303_03235	-0.383023	1.36051	None	CCA-adding protein	Translation, ribosomal structure and biogenesis
T303_00610	AIC23576	24	42.81	42.68	92.42	78.34	75.81	31	1.15878	0.847227	0.685488	0.510505	0.800499	0.766358	0.275603	0.0361	Yes	0.8349	No	0.2435	No		T303_00610	-0.38391	0.613501	None	50S ribosomal protein L2	Translation, ribosomal structure and biogenesis
T303_04145	AIC24131	468	2.63	3.85	32.36	12.41	6.326	3	0.787046	0.731139	0.801678	0.744732	0.766149	0.765889	0.0335826	< 0.0001	Yes	0.8674	No	0.0008	Yes		T303_04145	-0.384793	3.09691	None	peptidoglycan branched peptide synthesis protein	Cell wall/membrane/envelope biogenesis
T303_00545	AIC23563	119	18.21	19.59	80.17	74.38	70.25	10	0.862979	0.83946	0.685488	0.691831	0.769939	0.765646	0.0943792	0.0015	Yes	0.9885	No	0.0165	Yes		T303_00545	-0.385252	1.78252	None	50S ribosomal protein L18	Translation, ribosomal structure and biogenesis
T303_04265	AIC24152	369	5.12	5.3	30.43	12.37	10.03	4	0.809096	0.691831	0.801678	0.724436	0.75676	0.763057	0.0577849	0.0003	Yes	0.6959	No	0.0035	Yes		T303_04265	-0.390137	2.45593	None	GTP-binding protein	Translation, ribosomal structure and biogenesis
T303_07050	AIC24610	313	7.2	7.92	48.24	21.08	12.88	6	0.737904	0.642688	0.862979	0.787046	0.757654	0.762475	0.0923119	0.0013	Yes	0.8186	No	0.0135	Yes		T303_07050	-0.391238	1.86967	None	histidinol dehydrogenase	Amino acid transport and metabolism
T303_09650	AIC25059	553	1.77	2.36	55.24	48.57	31.43	2	0.505825	1.07647	0.474242	1.01859	0.768781	0.762208	0.322993	0.0461	Yes	0.9981	No	0.2476	No		T303_09650	-0.391743	0.606249	None	hypothetical protein	not assigned
T303_06940	AIC24588	519	2.04	2.32	35.21	29.58	8.451	2	1.92309	0.432514	1.08643	0.258226	0.925064	0.75947	0.754846	0.3937	No	0.7074	No	0.8553	No		T303_06940	-0.396936	0.0678815	None	exodeoxyribonuclease VII small subunit	Replication, recombination and repair
T303_07340	AIC24655	353	5.56	6.26	36	10.36	4.192	5	0.534564	0.37325	1.21339	0.981748	0.775738	0.758156	0.389076	0.0741	No	0.9753	No	0.3325	No		T303_07340	-0.399433	0.478208	None	DNA gyrase subunit A	Replication, recombination and repair
T303_05330	AIC24330	341	5.96	9.73	53.93	34.27	28.09	6	1.01859	1.44544	0.343558	0.49204	0.824907	0.755315	0.504999	0.1565	No	0.8395	No	0.5379	No		T303_05330	-0.404849	0.269298	None	7-cyano-7-deazaguanine reductase	Translation, ribosomal structure and biogenesis
T303_07865	AIC24737	9	68.23	68.52	52.14	40.06	32.07	54	0.619441	0.737904	0.772681	0.83946	0.742371	0.755292	0.0921532	0.0012	Yes	0.6013	No	0.0113	Yes		T303_07865	-0.404893	1.94692	None	beta-galactosidase	Carbohydrate transport and metabolism
T303_04930	AIC24263	222	11.6	12.78	96.25	96.25	95	17	0.816582	0.831764	0.685488	0.648634	0.745617	0.751035	0.0921564	0.0012	Yes	0.6441	No	0.0117	Yes		T303_04930	-0.413047	1.93181	None	50S ribosomal protein L31	Translation, ribosomal structure and biogenesis
T303_08005	AIC24759	488	2.26	2.39	26.16	5.939	1.766	2	0.937562	0.816582	0.672977	0.685488	0.778152	0.751035	0.124548	0.0036	Yes	0.8948	No	0.0378	Yes		T303_08005	-0.413047	1.42251	None	serine/threonine protein kinase	Signal transduction mechanisms
T303_07065	AIC24613	407	4.15	4.46	29.71	15.14	8.286	3	1.28233	1.01859	0.483059	0.390841	0.793705	0.750825	0.427446	0.0986	No	0.916	No	0.4056	No		T303_07065	-0.413452	0.391902	None	histidinol-phosphate aminotransferase	Amino acid transport and metabolism
T303_03710	AIC24055	214	11.91	12.61	49.71	40.46	25.43	7	0.801678	0.660694	0.879023	0.698232	0.759907	0.749955	0.0992982	0.0017	Yes	0.8635	No	0.0169	Yes		T303_03710	-0.415124	1.77211	None	phosphoribosyl transferase	Nucleotide transport and metabolism
T303_00495	AIC23553	41	35.71	36.88	77.88	50.64	50	23	0.711214	0.744732	0.751623	0.801678	0.752312	0.748177	0.0373453	< 0.0001	Yes	0.4324	No	0.0009	Yes		T303_00495	-0.418548	3.04576	None	DNA-directed RNA polymerase subunit alpha	Transcription
T303_06005	AIC24438	481	2.38	2.53	36.27	10.13	4.248	2	0.413047	0.954993	0.529663	1.1695	0.766801	0.742328	0.355414	0.0576	No	0.9901	No	0.2808	No		T303_06005	-0.429871	0.551603	None	riboflavin biosynthesis protein RibF	Coenzyme transport and metabolism
T303_00565	AIC23567	43	35.15	37.7	96.67	90	76.11	35	0.972747	0.887156	0.597035	0.554626	0.752891	0.742096	0.208138	0.0134	Yes	0.8854	No	0.0981	No		T303_00565	-0.430323	1.00833	None	50S ribosomal protein L5	Translation, ribosomal structure and biogenesis
T303_06336	AIC25182	239	10.82	11.07	36.44	19.45	12.33	6	0.724436	0.554626	0.981748	0.758578	0.754847	0.741507	0.175605	0.0084	Yes	0.8805	No	0.0683	No		T303_06336	-0.431468	1.16558	None	UDP-galactopyranose mutase	Cell wall/membrane/envelope biogenesis
T303_06650	AIC24535	34	38.66	38.71	83.53	56.47	46.27	34	0.862979	0.654636	0.824138	0.648634	0.747597	0.739387	0.111962	0.0022	Yes	0.7253	No	0.0204	Yes		T303_06650	-0.435598	1.69037	None	arginine ABC transporter ATP-binding protein	Amino acid transport and metabolism
T303_07045	AIC24609	368	5.14	5.45	37.63	22.16	14.43	3	0.376704	0.679204	0.794328	1.1695	0.754934	0.736766	0.327724	0.0448	Yes	0.9361	No	0.2317	No		T303_07045	-0.440722	0.635074	None	imidazoleglycerol-phosphate dehydratase	Amino acid transport and metabolism
T303_02295	AIC23821	323	6.68	6.74	48.04	43.58	25.14	7	0.711214	0.444631	1.18032	0.758578	0.773686	0.734896	0.30428	0.0407	Yes	0.9783	No	0.2336	No		T303_02295	-0.444389	0.631527	None	transcription antitermination protein NusG	Transcription
T303_04815	AIC24242	93	22.72	23.5	40.11	23.72	14.04	17	0.717794	0.613762	0.895365	0.751623	0.744636	0.734709	0.116356	0.0024	Yes	0.7013	No	0.0219	Yes		T303_04815	-0.444756	1.65956	None	phosphoenolpyruvate carboxylase	Energy production and conversion
T303_08195	AIC24795	440	3.32	3.94	28.45	11.45	4.714	5	0.855067	0.879022	0.570164	0.613762	0.729504	0.734414	0.160112	0.0057	Yes	0.654	No	0.0431	Yes		T303_08195	-0.445334	1.36552	None	alpha-L-Rha alpha-1,3-L-rhamnosyltransferase	Cell wall/membrane/envelope biogenesis
T303_00540	AIC23562	52	32.01	32.05	87.2	85.37	85.37	24	0.731139	0.801678	0.704693	0.724436	0.740487	0.727788	0.0423107	0.0001	Yes	0.2678	No	0.0012	Yes		T303_00540	-0.458411	2.92082	None	30S ribosomal protein S5	Translation, ribosomal structure and biogenesis
T303_08835	AIC24912	322	6.84	7.71	80.34	38.76	23.6	4	0.559758	0.660694	0.794328	0.879023	0.72345	0.727511	0.141374	0.0039	Yes	0.5636	No	0.0297	Yes		T303_08835	-0.458959	1.52724	None	hypothetical protein	not assigned
T303_00310	AIC23533	95	22.41	24.87	32.43	27.57	23.42	18	0.474242	0.505825	0.981748	0.946237	0.727013	0.726031	0.274327	0.025	Yes	0.7785	No	0.1407	No		T303_00310	-0.461897	0.851706	None	dihydroxyacetone kinase	General function prediction only
T303_07055	AIC24611	423	4.01	5.35	36.57	21.3	13.43	5	0.608135	0.809096	0.642688	0.887156	0.736769	0.725892	0.133223	0.0035	Yes	0.6597	No	0.0289	Yes		T303_07055	-0.462174	1.5391	None	ATP phosphoribosyltransferase	Amino acid transport and metabolism
T303_05255	AIC24317	62	30.31	30.46	68.8	49.6	38.4	16	0.751623	0.685488	0.765597	0.698232	0.725235	0.724928	0.0393036	< 0.0001	Yes	0.1113	No	0.0008	Yes		T303_05255	-0.464091	3.09691	None	membrane protein	Cell wall/membrane/envelope biogenesis
T303_03090	AIC23950	330	6.42	6.93	30.19	19.48	12.01	4	0.666807	0.744732	0.698232	0.787046	0.724204	0.721482	0.052724	0.0002	Yes	0.1864	No	0.0019	Yes		T303_03090	-0.470964	2.72125	None	ACP S-malonyltransferase	Lipid transport and metabolism
T303_06060	AIC24449	39	35.95	36.34	37.35	22.81	20.33	32	0.691831	0.672977	0.744732	0.751623	0.715291	0.718281	0.0388486	< 0.0001	Yes	0.0693	No	0.0007	Yes		T303_06060	-0.477379	3.1549	None	aminopeptidase N	Amino acid transport and metabolism
T303_08430	AIC24842	271	9.22	13.26	49.54	16.62	7.692	8	0.717794	0.928966	0.564937	0.717794	0.732373	0.717794	0.149565	0.0047	Yes	0.6562	No	0.0373	Yes		T303_08430	-0.478358	1.42829	None	DNA gyrase subunit B	Replication, recombination and repair
T303_00505	AIC23555	67	28.48	28.58	84.3	69.42	61.16	18	0.912011	0.77983	0.654636	0.60256	0.737259	0.717233	0.138228	0.0039	Yes	0.6754	No	0.032	Yes		T303_00505	-0.479486	1.49485	None	30S ribosomal protein S13	Translation, ribosomal structure and biogenesis
T303_06885	AIC24578	19	49.83	51.47	83.48	81.74	66.96	41	0.83946	0.758578	0.666807	0.60256	0.716851	0.712692	0.103828	0.0015	Yes	0.3876	No	0.0121	Yes		T303_06885	-0.488649	1.91721	None	phosphoglycerate mutase	Carbohydrate transport and metabolism
T303_07395	AIC24664	57	31.03	31.61	43.5	28.8	22.06	19	0.862979	0.672977	0.751623	0.608135	0.723928	0.7123	0.109706	0.0018	Yes	0.4697	No	0.0151	Yes		T303_07395	-0.489444	1.82102	None	phenylalanyl-tRNA synthase subunit beta	Translation, ribosomal structure and biogenesis
T303_00030	AIC23489	211	12	12.74	51.65	29.34	13.84	7	0.731139	0.772681	0.672977	0.685488	0.715571	0.708314	0.0455453	0.0001	Yes	0.0999	No	0.0011	Yes		T303_00030	-0.49754	2.95861	None	glutamyl-tRNA synthase	Translation, ribosomal structure and biogenesis
T303_02845	AIC23913	78	26.33	27.6	53.67	39.49	35.19	20	0.608135	0.809096	0.630957	0.77983	0.707005	0.705394	0.102119	0.0014	Yes	0.3102	No	0.0105	Yes		T303_02845	-0.503499	1.97881	None	transcription elongation factor NusA	Transcription
T303_03730	AIC24059	51	32.66	35.57	44.48	26.72	21.06	34	0.847227	0.630957	0.765597	0.580764	0.706136	0.698277	0.122219	0.0023	Yes	0.378	No	0.0171	Yes		T303_03730	-0.518129	1.767	None	carbamoyl phosphate synthase large subunit	Amino acid transport and metabolism
T303_03300	AIC23986	139	16.44	18.85	81.62	49.73	38.38	11	1.23595	0.524808	0.870964	0.37325	0.751242	0.697886	0.384457	0.0649	No	0.9315	No	0.2863	No		T303_03300	-0.518938	0.543179	None	ribosome recycling factor	Translation, ribosomal structure and biogenesis
T303_02515	AIC23857	132	17.26	17.63	70.98	53.73	38.04	11	0.758578	0.529663	0.895365	0.636796	0.7051	0.697687	0.15759	0.0048	Yes	0.4755	No	0.0333	Yes		T303_02515	-0.519349	1.47756	None	ribosomal large subunit pseudouridine synthase B	Translation, ribosomal structure and biogenesis
T303_02805	AIC23905	261	9.69	11.53	45.76	28.79	12.42	6	0.879022	0.990832	0.413047	0.515229	0.699533	0.697126	0.278755	0.023	Yes	0.6515	No	0.1201	No		T303_02805	-0.52051	0.920457	None	PTS mannose transporter subunit IIAB	Carbohydrate transport and metabolism
T303_06840	AIC24569	2	91.58	92.82	78.8	73.8	66.6	91	0.77983	0.801678	0.591562	0.613762	0.696708	0.696796	0.109337	0.0016	Yes	0.2768	No	0.0115	Yes		T303_06840	-0.521192	1.9393	None	pyruvate kinase	Carbohydrate transport and metabolism
T303_00005	AIC23484	545	1.91	4.77	38.68	8.883	5.731	4	0.496592	0.801678	0.591562	0.928966	0.7047	0.69662	0.196477	0.009	Yes	0.5583	No	0.0574	No		T303_00005	-0.521556	1.24109	None	DNA-binding protein	General function prediction only
T303_00630	AIC23580	109	19.83	20.55	91.18	81.37	76.47	12	0.691831	0.772681	0.672977	0.698232	0.70893	0.695032	0.0438315	0.0001	Yes	0.0707	No	0.0009	Yes		T303_00630	-0.524849	3.04576	None	30S ribosomal protein S10	Translation, ribosomal structure and biogenesis
T303_00840	AIC23614	250	10.14	10.28	91.84	69.39	67.35	6	0.698232	1.11686	0.42462	0.685488	0.731301	0.69186	0.2863	0.0285	Yes	0.8083	No	0.1572	No		T303_00840	-0.531447	0.803547	None	50S ribosomal protein L33	Translation, ribosomal structure and biogenesis
T303_08085	AIC24775	248	10.2	10.72	33.6	17.51	9.256	6	0.717794	0.887156	0.529663	0.660693	0.698827	0.689244	0.148209	0.0039	Yes	0.4124	No	0.0269	Yes		T303_08085	-0.536914	1.57025	None	peptide ABC transporter permease	not assigned
T303_06445	AIC24499	226	11.31	14.08	48.7	31.23	23.42	11	0.744732	0.60256	0.809096	0.630957	0.696836	0.687845	0.0968235	0.0011	Yes	0.2318	No	0.0082	Yes		T303_06445	-0.539845	2.08619	None	purine nucleoside phosphorylase	Nucleotide transport and metabolism
T303_06385	AIC24492	457	2.88	3.05	44.79	10.81	8.494	5	0.515229	0.597035	0.772681	0.824138	0.677271	0.684858	0.145337	0.0033	Yes	0.2952	No	0.0212	Yes		T303_06385	-0.546123	1.67366	None	epsG	not assigned
T303_00575	AIC23569	79	26.15	26.32	87.7	72.13	67.21	15	0.765597	0.928966	0.519996	0.60256	0.70428	0.684078	0.181247	0.0072	Yes	0.5255	No	0.047	Yes		T303_00575	-0.547767	1.3279	None	50S ribosomal protein L14	Translation, ribosomal structure and biogenesis
T303_02730	AIC23895	249	10.17	10.26	41.05	16.59	16.59	5	0.954993	0.765597	0.60256	0.461318	0.696117	0.684078	0.212703	0.0108	Yes	0.5413	No	0.0647	No		T303_02730	-0.547767	1.1891	None	PhoB family transcriptional regulator	Signal transduction mechanisms
T303_03055	AIC23943	241	10.5	10.96	61.06	21.68	11.73	7	0.809096	0.534564	0.824138	0.554626	0.680606	0.681861	0.157385	0.0043	Yes	0.3422	No	0.027	Yes		T303_03055	-0.552451	1.56864	None	aspartate kinase	Amino acid transport and metabolism
T303_00560	AIC23566	339	6.02	6.17	44.26	44.26	34.43	4	0.83946	0.60256	0.758578	0.564937	0.691384	0.680569	0.129512	0.0026	Yes	0.3157	No	0.0175	Yes		T303_00560	-0.555187	1.75696	None	30S ribosomal protein S14	Translation, ribosomal structure and biogenesis
T303_00275	AIC23528	6	79.5	79.54	58.59	40.82	29.92	43	0.597035	0.879022	0.496592	0.744732	0.679346	0.670884	0.16765	0.0051	Yes	0.3623	No	0.0315	Yes		T303_00275	-0.575866	1.50169	None	DNA-directed RNA polymerase subunit beta	Transcription
T303_08030	AIC24764	304	7.51	8.28	94.23	69.23	35.58	5	0.636796	1.13763	0.42462	0.698232	0.724319	0.667514	0.299435	0.031	Yes	0.7839	No	0.1628	No		T303_08030	-0.58313	0.788346	None	DNA-directed RNA polymerase subunit omega	Transcription
T303_09780	AIC25081	125	17.74	17.8	85.4	59.85	49.64	13	0.787046	0.691831	0.642688	0.554626	0.669048	0.667259	0.0970049	0.001	Yes	0.1309	No	0.0064	Yes		T303_09780	-0.58368	2.19382	None	30S ribosomal protein S12	Translation, ribosomal structure and biogenesis
T303_09120	AIC24967	465	2.69	3.01	34.46	9.233	2.341	2	0.824138	0.654636	0.679204	0.534564	0.673136	0.66692	0.11886	0.0018	Yes	0.2044	No	0.0118	Yes		T303_09120	-0.584415	1.92812	None	formate acetyltransferase	Energy production and conversion
T303_01110	AIC23656	184	13.73	13.96	54.99	25.34	19.68	8	1.19124	0.672977	0.648634	0.37325	0.721526	0.660806	0.341369	0.0428	Yes	0.7982	No	0.2013	No		T303_01110	-0.597702	0.696156	None	GTP-binding protein YchF	Translation, ribosomal structure and biogenesis
T303_07255	AIC24643	15	55.21	55.46	77.15	62.26	52.41	47	0.937562	0.597035	0.724436	0.47863	0.684416	0.660736	0.196357	0.0082	Yes	0.4513	No	0.0488	Yes		T303_07255	-0.597855	1.31158	None	glyceraldehyde-3-phosphate dehydrogenase	Energy production and conversion
T303_05225	AIC24313	200	12.6	16.86	83.13	62.65	57.83	10	0.724436	0.758578	0.549541	0.591562	0.656029	0.657999	0.101146	0.001	Yes	0.1112	No	0.0065	Yes		T303_05225	-0.603843	2.18709	None	30S ribosomal protein S20	Translation, ribosomal structure and biogenesis
T303_09805	AIC25174	529	2.02	2.02	18.26	5.479	5.479	2	0.194089	0.47863	0.824138	3.31131	1.20204	0.651384	1.42958	0.8997	No	0.5876	No	0.7958	No		T303_09805	-0.61842	0.0991961	None	ribulose-phosphate 3-epimerase	Carbohydrate transport and metabolism
T303_08535	AIC24859	462	2.77	2.82	24.81	10.15	7.895	3	0.452898	0.666807	0.625173	0.946237	0.672779	0.64599	0.204474	0.0087	Yes	0.4152	No	0.0493	Yes		T303_08535	-0.630417	1.30715	None	dihydropteroate synthase	Coenzyme transport and metabolism
T303_09005	AIC24945	319	7.01	8.69	29.89	16.09	10.73	6	0.586138	0.704693	0.586138	0.744732	0.655425	0.645416	0.0816586	0.0006	Yes	0.0686	No	0.0035	Yes		T303_09005	-0.6317	2.45593	None	GTP-sensing transcriptional pleiotropic repressor codY	Transcription
T303_00175	AIC23510	338	6.08	6.09	36.23	15.46	13.04	3	0.809096	0.691831	0.597035	0.549541	0.661876	0.644433	0.114593	0.0016	Yes	0.1578	No	0.0097	Yes		T303_00175	-0.633897	2.01323	None	tRNA-binding protein	Translation, ribosomal structure and biogenesis
T303_07430	AIC24670	134	16.69	17.1	51.96	35.47	23.46	10	0.591562	0.801678	0.534564	0.691831	0.654909	0.641696	0.117474	0.0016	Yes	0.1469	No	0.0098	Yes		T303_07430	-0.640037	2.00877	None	aspartate-semialdehyde dehydrogenase	Amino acid transport and metabolism
T303_02380	AIC23834	344	5.81	6.25	33.39	15.48	9.839	8	0.461318	0.672977	0.608135	1	0.685607	0.640556	0.22753	0.0124	Yes	0.5157	No	0.0699	No		T303_02380	-0.642604	1.15552	None	hypothetical protein	not assigned
T303_02590	AIC23869	191	13.13	14.48	32.17	17.13	11.71	9	0.685488	0.524808	0.737904	0.591562	0.63494	0.638525	0.0951623	0.0008	Yes	0.0666	No	0.0046	Yes		T303_02590	-0.647185	2.33724	None	urease subunit alpha	Amino acid transport and metabolism
T303_01340	AIC23677	174	14.33	15.08	48.02	27.56	18.16	9	0.519996	0.591562	0.679204	0.744732	0.633873	0.635383	0.0984933	0.0009	Yes	0.0709	No	0.005	Yes		T303_01340	-0.654302	2.30103	None	amidophosphoribosyltransferase	Nucleotide transport and metabolism
T303_08465	AIC24848	60	30.4	30.49	82.91	54.08	38.52	20	0.559758	0.452898	0.801678	0.704693	0.629757	0.632225	0.15422	0.0032	Yes	0.1683	No	0.0172	Yes		T303_08465	-0.661489	1.76447	None	3-phosphoglycerate dehydrogenase	Coenzyme transport and metabolism
T303_06720	AIC24549	550	1.81	2.28	44.81	15.58	8.442	2	0.887156	0.293765	1.09648	0.359749	0.659287	0.623453	0.394288	0.0475	Yes	0.6161	No	0.1824	No		T303_06720	-0.681648	0.738975	None	30S ribosomal protein S1	Defense mechanisms
T303_02605	AIC23872	150	15.8	16.39	50	39.22	31.37	10	0.772681	0.380189	0.870964	0.469894	0.623432	0.621287	0.235434	0.0105	Yes	0.3037	No	0.0494	Yes		T303_02605	-0.686667	1.30627	None	urease accessory protein UreG	Posttranslational modification, protein turnover, chaperones
T303_07155	AIC24625	94	22.48	25.23	60.63	38.22	30.17	16	0.870964	0.474242	0.765597	0.409261	0.630016	0.619919	0.223186	0.0093	Yes	0.3008	No	0.0452	Yes		T303_07155	-0.689848	1.34486	None	dTDP-glucose 4,6-dehydratase	Cell wall/membrane/envelope biogenesis
T303_02585	AIC23868	293	7.97	8.01	41.75	28.16	28.16	4	0.801678	0.60256	0.636796	0.496592	0.634406	0.619678	0.126481	0.0018	Yes	0.1228	No	0.0103	Yes		T303_02585	-0.69041	1.98716	None	urease subunit beta	Amino acid transport and metabolism
T303_03305	AIC23987	236	10.9	11.34	56.52	29.77	16.05	8	0.895365	0.461318	0.765597	0.37325	0.623882	0.613457	0.247002	0.012	Yes	0.3242	No	0.0556	No		T303_03305	-0.704966	1.25493	None	S1 RNA-binding protein	General function prediction only
T303_02235	AIC23813	453	2.95	3.01	27.34	7.491	7.491	2	0.496592	0.912011	0.398107	0.724436	0.632787	0.610514	0.230932	0.0103	Yes	0.3226	No	0.0501	No		T303_02235	-0.711903	1.30016	None	ABC transporter ATP-binding protein	General function prediction only
T303_04970	AIC24271	548	1.86	1.99	22.89	5.97	5.97	2	0.337287	0.862979	0.353183	0.903649	0.614275	0.608081	0.311171	0.0217	Yes	0.3928	No	0.0893	No		T303_04970	-0.717665	1.04915	None	tRNA threonylcarbamoyl adenosine modification protein	Translation, ribosomal structure and biogenesis
T303_00550	AIC23564	104	21.07	22.89	88.2	83.71	56.74	22	0.685488	0.801678	0.436516	0.529663	0.613336	0.607576	0.162219	0.0035	Yes	0.1504	No	0.0175	Yes		T303_00550	-0.718864	1.75696	None	50S ribosomal protein L6	Translation, ribosomal structure and biogenesis
T303_07165	AIC24627	178	14.13	14.57	52.6	37.02	19.72	8	0.524808	0.717794	0.428549	0.679204	0.587588	0.602006	0.134885	0.0018	Yes	0.0742	No	0.0088	Yes		T303_07165	-0.732151	2.05552	None	dTDP-glucose pyrophosphorylase	Cell wall/membrane/envelope biogenesis
T303_08845	AIC24914	77	26.46	27.24	49.3	27.1	19.23	17	0.564937	0.77983	0.432514	0.630957	0.60206	0.597947	0.144408	0.0024	Yes	0.1036	No	0.0118	Yes		T303_08845	-0.74191	1.92812	None	dihydroxy-acid dehydratase	Amino acid transport and metabolism
T303_08515	AIC24855	506	2.12	2.18	29.93	7.566	3.618	2	0.201372	0.954993	0.239883	1.09648	0.623182	0.597438	0.468668	0.0631	No	0.5774	No	0.2062	No		T303_08515	-0.743139	0.685711	None	UDP-N-acetylenolpyruvoylglucosamine reductase	Cell wall/membrane/envelope biogenesis
T303_05160	AIC24303	85	25.02	25.75	38.31	24.46	21.76	15	0.824138	0.376704	0.758578	0.353183	0.578151	0.567641	0.247827	0.0101	Yes	0.2208	No	0.0423	Yes		T303_05160	-0.81695	1.37366	None	formate--tetrahydrofolate ligase	Nucleotide transport and metabolism
T303_03115	AIC23955	175	14.24	14.6	45.12	26.03	17.35	7	0.47863	0.340408	0.870964	0.654636	0.58616	0.566633	0.229317	0.0084	Yes	0.2087	No	0.0365	Yes		T303_03115	-0.819513	1.43771	None	acetyl-CoA carboxylase biotin carboxylase subunit	Lipid transport and metabolism
T303_03545	AIC24028	133	16.91	17.97	54.37	44.05	34.52	17	0.92045	0.672977	0.448745	0.331131	0.593326	0.560861	0.260131	0.0122	Yes	0.2692	No	0.0522	No		T303_03545	-0.834285	1.28233	None	triosephosphate isomerase	Carbohydrate transport and metabolism
T303_06455	AIC24500	364	5.21	5.51	39.95	16.13	7.692	4	0.328095	0.816582	0.331131	0.787046	0.565714	0.559088	0.272895	0.0126	Yes	0.2327	No	0.05	Yes		T303_06455	-0.838852	1.30103	None	phosphopentomutase	Carbohydrate transport and metabolism
T303_00465	AIC23551	50	32.81	35.04	60.75	44.71	44.71	33	0.801678	0.642688	0.474242	0.380189	0.574699	0.558465	0.18625	0.0044	Yes	0.1279	No	0.0197	Yes		T303_00465	-0.840462	1.70553	None	fructose-1,6-bisphosphate aldolase	Carbohydrate transport and metabolism
T303_08075	AIC24773	224	11.53	11.76	33.8	21.88	14.96	6	0.515229	0.787046	0.394457	0.597035	0.573442	0.556132	0.164932	0.0031	Yes	0.0982	No	0.014	Yes		T303_08075	-0.846501	1.85387	None	peptide ABC transporter ATP-binding protein	Amino acid transport and metabolism
T303_01330	AIC23675	86	24.95	27.44	84.26	68.51	60.43	20	0.679204	0.660694	0.42462	0.436516	0.550258	0.548605	0.138498	0.0017	Yes	0.0508	No	0.0074	Yes		T303_01330	-0.866161	2.13077	None	phosphoribosylaminoimidazole-succinocarboxamide synthase	Nucleotide transport and metabolism
T303_01300	AIC23670	340	6	6.18	45.54	20.31	13.85	5	0.529663	0.787046	0.366438	0.544503	0.556912	0.537083	0.173338	0.0033	Yes	0.0917	No	0.0145	Yes		T303_01300	-0.896783	1.83863	None	ribose-phosphate pyrophosphokinase	Amino acid transport and metabolism
T303_03050	AIC23942	55	31.3	34.09	67.27	63.03	48.48	25	0.831764	0.529663	0.539511	0.363078	0.566004	0.534587	0.19479	0.0048	Yes	0.1282	No	0.021	Yes		T303_03050	-0.903503	1.67778	None	aspartate--ammonia ligase	Amino acid transport and metabolism
T303_07350	AIC24657	260	9.71	9.87	33.41	18.22	11.06	5	0.313329	0.469894	0.57544	1.1695	0.632041	0.522667	0.374137	0.0375	Yes	0.5165	No	0.1439	No		T303_07350	-0.936036	0.841939	None	NADH oxidase	Lipid transport and metabolism
T303_06460	AIC24501	193	13.09	13.49	68.58	53.1	30.97	7	0.359749	0.534564	0.49204	0.758578	0.536233	0.513302	0.165871	0.0027	Yes	0.0673	No	0.0113	Yes		T303_06460	-0.96212	1.94692	None	ribose 5-phosphate isomerase	Carbohydrate transport and metabolism
T303_05520	AIC24359	426	3.85	4.03	24.77	17.43	17.43	3	0.277971	0.685488	0.337287	0.824138	0.531221	0.511388	0.265421	0.0102	Yes	0.1708	No	0.0386	Yes		T303_05520	-0.96751	1.41341	None	hypothetical protein	Transcription
T303_00600	AIC23574	96	22.38	23.85	97.37	81.58	75.44	18	0.691831	0.816582	0.299226	0.322107	0.532437	0.506969	0.26126	0.0098	Yes	0.1676	No	0.0373	Yes		T303_00600	-0.980031	1.42829	None	50S ribosomal protein L22	Translation, ribosomal structure and biogenesis
T303_01945	AIC23761	373	4.96	5.48	45.88	16.48	11.61	7	0.310456	0.383707	0.597035	0.717794	0.502248	0.490371	0.188221	0.0034	Yes	0.0658	No	0.0132	Yes		T303_01945	-1.02805	1.87943	None	CTP synthetase	Nucleotide transport and metabolism
T303_07425	AIC24669	309	7.33	7.6	39.01	20.74	17.96	7	0.260615	0.801678	0.229087	0.717794	0.502294	0.489205	0.299512	0.0129	Yes	0.1727	No	0.0449	Yes		T303_07425	-1.03149	1.34775	None	dihydrodipicolinate synthase	Amino acid transport and metabolism
T303_00590	AIC23572	180	13.99	14.42	69.34	56.2	48.91	8	0.895365	0.559758	0.401791	0.267917	0.531208	0.480774	0.270491	0.0108	Yes	0.1767	No	0.0405	Yes		T303_00590	-1.05657	1.39254	None	50S ribosomal protein L16	Translation, ribosomal structure and biogenesis
T303_08860	AIC24916	424	4.01	4.03	19.72	12.68	6.573	2	0.912011	0.401791	0.549541	0.244343	0.526921	0.475666	0.285373	0.0123	Yes	0.1881	No	0.0452	Yes		T303_08860	-1.07198	1.34486	None	tRNA (guanine-N(7)-)-methyltransferase	Translation, ribosomal structure and biogenesis
T303_00295	AIC23531	265	9.4	9.56	57.59	51.27	39.87	7	0.180302	0.591562	0.272898	0.744732	0.447373	0.43223	0.265193	0.0076	Yes	0.0936	No	0.0251	Yes		T303_00295	-1.21013	1.60033	None	acetolactate synthase	Amino acid transport and metabolism
T303_04610	AIC24210	374	4.96	5.17	27.65	7.373	7.373	4	0.201372	0.870964	0.159956	0.630957	0.465812	0.416165	0.343946	0.0167	Yes	0.1759	No	0.053	No		T303_04610	-1.26477	1.27572	None	protease	Posttranslational modification, protein turnover, chaperones
T303_03580	AIC25119	509	2.08	2.15	41.59	15.93	11.5	2	0.648634	0.131826	0.519996	0.108643	0.352275	0.325911	0.273199	0.0061	Yes	0.0553	No	0.0178	Yes		T303_03580	-1.61745	1.74958	None	nitrogen regulatory protein P-II	Signal transduction mechanisms

## Sheet: Cd3 vs Cd1
									Fold change (ratio)							One sample t-test							Volcano plot
Locus_tag	GenBank Accession	N	Unused	Total	%Cov	%Cov(50)	%Cov(95)	Peptides(95%)	118:113	119:113	118:117	119:117	Fold change (mean)	Fold change (median)	Fold change (SD)	P-value (two tailed) µ=1.3	Significant? µ=1.3	P-value (two tailed) µ=0.7692	Significant? µ=0.7692	P-value (two tailed) µ=1	Significant? µ=1	DEPs (based on µ=1.3 & µ=0.7692)	Locus_tag	Log2_FCmedian	MinusLog10_pvalue	Label	GenBank_annotation	COG description
T303_02230	AIC23812	562	1.61	2.73	39.3	7.891	3.642	4	0.685488	0.666807	0.660693	0.642688	0.663919	0.66375	0.0176516	< 0.0001	Yes	0.0013	Yes	0.0001	Yes	Down	T303_02230	-0.591288	4	Down	ABC transporter permease	General function prediction only
T303_06400	AIC24494	563	1.59	3.07	29.67	7.473	4.835	4	0.465586	0.487529	0.554626	0.586138	0.52347	0.521077	0.0563924	0.0001	Yes	0.0032	Yes	0.0005	Yes	Down	T303_06400	-0.940431	3.30103	Down	epsE	Cell wall/membrane/envelope biogenesis
T303_04230	AIC24146	483	2.35	3.45	58.8	23.94	8.803	4	0.636796	0.366438	0.648634	0.387258	0.509781	0.512027	0.15381	0.002	Yes	0.0433	Yes	0.0078	Yes	Down	T303_04230	-0.965709	2.10791	Down	tetrahydrofolate dehydrogenase	Coenzyme transport and metabolism
T303_04145	AIC24131	468	2.63	3.85	32.36	12.41	6.326	3	0.57544	0.409261	0.580764	0.413047	0.494628	0.494244	0.0964244	0.0005	Yes	0.0107	Yes	0.0019	Yes	Down	T303_04145	-1.01671	2.72125	Down	peptidoglycan branched peptide synthesis protein	Cell wall/membrane/envelope biogenesis
T303_08165	AIC24789	197	12.78	13.93	58.75	23.74	23.74	9	0.570164	0.405508	0.529663	0.380189	0.471381	0.467586	0.0927543	0.0004	Yes	0.0077	Yes	0.0014	Yes	Down	T303_08165	-1.0967	2.85387	Down	ribose-phosphate pyrophosphokinase	Nucleotide transport and metabolism
T303_03580	AIC25119	509	2.08	2.15	41.59	15.93	11.5	2	0.432514	0.60256	0.340408	0.47863	0.463528	0.455572	0.109054	0.0006	Yes	0.0112	Yes	0.0022	Yes	Down	T303_03580	-1.13425	2.65758	Down	nitrogen regulatory protein P-II	Signal transduction mechanisms
T303_00030	AIC23489	211	12	12.74	51.65	29.34	13.84	7	0.660694	0.291072	0.559758	0.263027	0.443637	0.425415	0.197056	0.0032	Yes	0.0456	Yes	0.011	Yes	Down	T303_00030	-1.23306	1.95861	Down	glutamyl-tRNA synthase	Translation, ribosomal structure and biogenesis
T303_01405	AIC23685	36	37.73	38.22	77.08	55.79	49.54	32	0.591562	0.237684	0.625173	0.239883	0.423575	0.415722	0.213822	0.0038	Yes	0.0481	Yes	0.0125	Yes	Down	T303_01405	-1.26631	1.90309	Down	adenylosuccinate lyase	Nucleotide transport and metabolism
T303_09715	AIC25072	308	7.36	7.87	69.35	49.19	25	7	0.420727	0.465586	0.376704	0.405509	0.417131	0.413118	0.0371046	< 0.0001	Yes	0.0003	Yes	0.0001	Yes	Down	T303_09715	-1.27538	4	Down	repressor of the glutamine synthetase, MerR family transcriptional regulator	Transcription
T303_07050	AIC24610	313	7.2	7.92	48.24	21.08	12.88	6	0.448745	0.277971	0.515229	0.353183	0.398782	0.400964	0.104452	0.0004	Yes	0.0058	Yes	0.0014	Yes	Down	T303_07050	-1.31845	2.85387	Down	histidinol dehydrogenase	Amino acid transport and metabolism
T303_07285	AIC24649	279	8.59	10.33	39.57	17.25	8.906	12	0.630957	0.242103	0.559758	0.212814	0.411408	0.40093	0.214719	0.0037	Yes	0.0446	Yes	0.0119	Yes	Down	T303_07285	-1.31858	1.92445	Down	aconitate hydratase	Energy production and conversion
T303_02640	AIC23879	187	13.43	15.22	36.31	11.5	9.489	10	0.505825	0.226986	0.529663	0.2208	0.370819	0.366406	0.169952	0.0016	Yes	0.0183	Yes	0.0051	Yes	Down	T303_02640	-1.44849	2.29243	Down	NUDIX hydrolase	Coenzyme transport and metabolism
T303_05515	AIC24358	105	20.77	21.38	54.49	31.73	21.93	12	0.20893	0.366438	0.340408	0.613762	0.382384	0.353423	0.168956	0.0017	Yes	0.0196	Yes	0.0053	Yes	Down	T303_05515	-1.50053	2.27572	Down	glucosamine-fructose-6-phosphate aminotransferase	Cell wall/membrane/envelope biogenesis
T303_03130	AIC23958	442	3.23	3.43	61.87	16.88	14.37	3	0.666807	0.301995	0.401791	0.21677	0.396841	0.351893	0.195215	0.0027	Yes	0.0317	Yes	0.0085	Yes	Down	T303_03130	-1.50679	2.07058	Down	S-ribosylhomocysteinase	Signal transduction mechanisms
T303_06055	AIC24448	316	7.13	7.4	51.38	21.1	17.43	5	0.465586	0.235505	0.49204	0.2208	0.353483	0.350545	0.145245	0.001	Yes	0.0106	Yes	0.003	Yes	Down	T303_06055	-1.51233	2.52288	Down	PhoU family transcriptional regulator	Inorganic ion transport and metabolism
T303_02315	AIC23824	253	10.02	12.4	34.21	12.85	9.484	9	0.534564	0.192309	0.47863	0.169044	0.343637	0.33547	0.189789	0.0021	Yes	0.0207	Yes	0.0062	Yes	Down	T303_02315	-1.57575	2.20761	Down	leucyl-tRNA synthase	Translation, ribosomal structure and biogenesis
T303_06855	AIC24572	188	13.43	13.78	65.9	52.49	36.4	15	0.394457	0.220801	0.483059	0.270396	0.342178	0.332427	0.118976	0.0005	Yes	0.0056	Yes	0.0016	Yes	Down	T303_06855	-1.58889	2.79588	Down	translation factor (SUA5)	Translation, ribosomal structure and biogenesis
T303_02950	AIC23932	170	14.58	14.92	68.22	44.92	34.32	9	0.387258	0.207014	0.524807	0.272898	0.347994	0.330078	0.139427	0.0008	Yes	0.0091	Yes	0.0026	Yes	Down	T303_02950	-1.59912	2.58503	Down	amino acid ABC transporter ATPase	Amino acid transport and metabolism
T303_04605	AIC24209	377	4.87	4.94	25.57	15.21	13.27	4	0.619441	0.148594	0.483059	0.113763	0.341214	0.315826	0.249243	0.0046	Yes	0.0414	Yes	0.0132	Yes	Down	T303_04605	-1.6628	1.87943	Down	peptidase family U32	Posttranslational modification, protein turnover, chaperones
T303_00290	AIC23530	26	41.79	41.8	57.06	56.47	45.59	44	0.597035	0.16293	0.452898	0.148594	0.340364	0.307914	0.221211	0.0032	Yes	0.0304	Yes	0.0094	Yes	Down	T303_00290	-1.6994	2.02687	Down	ketol-acid reductoisomerase	Amino acid transport and metabolism
T303_03455	AIC25117	438	3.37	3.55	31.12	12.94	11.54	4	0.30761	0.316228	0.267917	0.299226	0.297745	0.303418	0.0210621	< 0.0001	Yes	< 0.0001	Yes	0.0001	Yes	Down	T303_03455	-1.72062	4	Down	homoserine kinase	Amino acid transport and metabolism
T303_03730	AIC24059	51	32.66	35.57	44.48	26.72	21.06	34	0.534564	0.12942	0.452898	0.124738	0.310405	0.291159	0.214305	0.0027	Yes	0.0234	Yes	0.0076	Yes	Down	T303_03730	-1.78012	2.11919	Down	carbamoyl phosphate synthase large subunit	Amino acid transport and metabolism
T303_09765	AIC25078	18	52.37	52.29	73.91	62.03	61.45	55	0.340408	0.167494	0.57544	0.235505	0.329712	0.287957	0.178593	0.0017	Yes	0.0161	Yes	0.0049	Yes	Down	T303_09765	-1.79608	2.3098	Down	glyceraldehyde-3-phosphate dehydrogenase	Carbohydrate transport and metabolism
T303_01355	AIC23680	30	40.16	42.62	58.27	42.29	37.59	35	0.529663	0.155597	0.409261	0.124738	0.304815	0.282429	0.196773	0.0021	Yes	0.018	Yes	0.0058	Yes	Down	T303_01355	-1.82404	2.23657	Down	purine biosynthesis protein purH	Nucleotide transport and metabolism
T303_07020	AIC24604	497	2.17	2.27	49.04	25	20.19	3	0.461318	0.201372	0.356451	0.167494	0.296659	0.278912	0.137175	0.0007	Yes	0.0063	Yes	0.002	Yes	Down	T303_07020	-1.84212	2.69897	Down	phosphoribosyl-ATP pyrophosphatase	Amino acid transport and metabolism
T303_08665	AIC24882	102	21.73	21.99	55.41	33.78	25.62	12	0.672977	0.111686	0.420727	0.0824138	0.321951	0.266206	0.279622	0.006	Yes	0.0494	Yes	0.0167	Yes	Down	T303_08665	-1.90938	1.77728	Down	RNA helicase	Replication, recombination and repair
T303_09710	AIC25071	44	35	37.37	57.46	48.46	38.38	28	0.440555	0.0855067	0.448745	0.0824138	0.264305	0.263031	0.208275	0.0022	Yes	0.0167	Yes	0.0058	Yes	Down	T303_09710	-1.9267	2.23657	Down	glutamine synthetase	Amino acid transport and metabolism
T303_01345	AIC23678	233	11.03	11.31	45.72	26.55	24.48	7	0.457088	0.0672977	0.559758	0.0679204	0.288016	0.262504	0.257933	0.0043	Yes	0.0335	Yes	0.0117	Yes	Down	T303_01345	-1.92959	1.93181	Down	phosphoribosylaminoimidazole synthetase	Nucleotide transport and metabolism
T303_06415	AIC24496	476	2.51	2.59	45.68	14.4	6.584	2	0.313329	0.147231	0.505825	0.207014	0.29335	0.260171	0.157426	0.001	Yes	0.0091	Yes	0.0029	Yes	Down	T303_06415	-1.94247	2.5376	Down	epsB	Signal transduction mechanisms
[truncated: 507 more rows]

## Sheet: Cd4 vs Cd1
									Fold change (ratio)							One sample t-test							Volcano plot
[truncated: 537 more rows]

## Sheet: Cd3 vs Cd2
									Fold change (ratio)							One sample t-test							Volcano plot
[truncated: 537 more rows]

## Sheet: Cd4 vs Cd2
									Fold change (ratio)							One sample t-test							Volcano plot
[truncated: 537 more rows]
